# Supplementary material
Source: publisher site journal article supplement (https://www.spandidos-publications.com/8656/downloadSupplementary)
Supplement: Supplementary file 1 [file downloadSupplementary]

## Sheet: Sheet1
Table SI. SMR analysis on mQTL and GWAS datasets.
Outcome	probeID	ProbeChr	Gene	Probe_bp	topSNP	topSNP_chr	topSNP_bp	A1	A2	Freq	b_GWAS	se_GWAS	p_GWAS	b_eQTL	se_eQTL	p_eQTL	b_SMR	se_SMR	p_SMR	p_HEIDI	nsnp_HEIDI	lo_ci	up_ci	or	or_lci95	or_uci95	OR (95%CI)	FDR	nsnps	PP.H0.abf	PP.H1.abf	PP.H2.abf	PP.H3.abf	PP.H4.abf	PP.H4.abf_conditional	PP.H4.abf_1	PP.H4.abf_2
renal_carcinoma	cg07431106	17	CCL2	32561989	rs113274498	17	32566488	C	T	0.189162	0.139288	0.0403721	0.000560376	-0.775017	0.0373821	1.7707e-95	-0.179722	0.0528082	0.000665772	0.177541	20	-0.283226	-0.0762179	0.835502	0.753349	0.926614	0.836(0.753,0.927)	0.803305	2591	3.94563e-85	0.1305	2.54757e-85	0.0834738	0.786026	0.903998	0.8695	9.41644
renal_carcinoma	cg10148591	19	INSR	7197021	rs4804372	19	7191712	A	G	0.273006	0.12286	0.0383022	0.00133825	-0.645605	0.0346707	2.16928e-77	-0.190302	0.0602014	0.00157179	0.815773	20	-0.308297	-0.0723073	0.826709	0.734697	0.930245	0.827(0.735,0.93)	0.803305	2301	1.09449e-68	0.281459	3.69056e-69	0.0942824	0.624258	0.868786	0.718541	6.62116
renal_carcinoma	cg04202892	2	BCL2L11	111875749	rs7593638	2	111876941	C	A	0.466258	-0.109165	0.0343483	0.00148207	0.830127	0.0293199	2.40776e-176	-0.131504	0.041637	0.00158673	0.584518	20	-0.213113	-0.0498955	0.876776	0.808065	0.951329	0.877(0.808,0.951)	0.803305	1102	3.15031e-165	0.288292	8.81654e-166	0.0800505	0.631658	0.887523	0.711708	7.89074
renal_carcinoma	cg12446953	1	PINK1	20960867	rs10916827	1	20933341	A	G	0.389571	0.125254	0.0357245	0.000454735	-0.230283	0.0324843	1.3504e-12	-0.543911	0.17307	0.0016738	0.446505	18	-0.883128	-0.204694	0.580474	0.413487	0.814897	0.58(0.413,0.815)	0.803305	1797	4.65701e-08	0.155591	9.53551e-09	0.0310448	0.813365	0.963235	0.844409	26.1997
renal_carcinoma	cg12698626	17	CCL2	32581466	rs1019109	17	32615120	G	A	0.187117	0.128422	0.0411309	0.00179456	0.740344	0.0381908	1.02495e-83	0.173463	0.0562724	0.00205233	0.0736452	20	0.0631691	0.283757	1.18942	1.06521	1.32811	1.189(1.065,1.328)	0.803305	2591	5.85201e-74	0.263729	3.77845e-74	0.169715	0.566557	0.769494	0.736271	3.33829
renal_carcinoma	cg00997280	2	BCL2L11	111876752	rs676119	2	111912718	A	G	0.50409	0.112104	0.0347438	0.00125281	0.269311	0.0321002	4.8739e-17	0.416261	0.138222	0.00259927	0.469757	20	0.145346	0.687176	1.51628	1.15644	1.98809	1.516(1.156,1.988)	0.803305	1102	5.35891e-12	0.26637	1.49976e-12	0.0738874	0.659743	0.899285	0.73363	8.92903
renal_carcinoma	cg18646521	2	BCL2L11	111875858	rs1837369	2	111874276	T	C	0.46728	-0.106878	0.0343038	0.00183553	0.387454	0.0330505	9.70711e-32	-0.275847	0.0916099	0.00260302	0.616618	20	-0.455402	-0.0962916	0.758929	0.634193	0.908199	0.759(0.634,0.908)	0.803305	1102	7.8983e-26	0.292898	2.21044e-26	0.0813455	0.625757	0.884959	0.707102	7.69259
renal_carcinoma	cg08884395	6	ESR1	152127887	rs76668415	6	152123971	G	A	0.111452	-0.188933	0.055703	0.000694362	-0.335487	0.0519535	1.0648e-10	0.563161	0.187547	0.00267529	0.551713	11	0.195569	0.930753	1.75622	1.216	2.53642	1.756(1.216,2.536)	0.803305	2270	9.10737e-07	0.0347493	1.32658e-06	0.0497004	0.915548	0.94851	0.965248	18.4213
renal_carcinoma	cg22815214	1	CACNA1S	201083145	rs2281845	1	201081943	T	C	0.40593	0.104158	0.0349744	0.00290025	1.00967	0.024949	0	0.10316	0.0347331	0.00297717	0.640779	20	0.0350831	0.171237	1.10867	1.03571	1.18677	1.109(1.036,1.187)	0.803305	2467	0	0.384781	0	0.126488	0.488731	0.794401	0.615219	3.86385
renal_carcinoma	cg17810781	1	CACNA1S	201082982	rs3738263	1	201083506	G	A	0.41002	0.103988	0.035079	0.00303275	0.994567	0.0251385	0	0.104556	0.0353695	0.00311543	0.730479	20	0.0352318	0.17388	1.11022	1.03586	1.18991	1.11(1.036,1.19)	0.803305	2467	0	0.385443	0	0.126708	0.48785	0.793823	0.614557	3.8502
renal_carcinoma	cg24849736	1	CACNA1S	201084428	rs3738263	1	201083506	G	A	0.41002	0.103988	0.035079	0.00303275	-0.781947	0.0289486	1.08094e-160	-0.132986	0.0451305	0.00321177	0.676997	20	-0.221442	-0.0445302	0.875477	0.801363	0.956447	0.875(0.801,0.956)	0.803305	2467	8.61508e-150	0.385385	2.84296e-150	0.126689	0.487926	0.793873	0.614615	3.85138
renal_carcinoma	cg18114828	19	INSR	7200027	rs1035941	19	7199939	A	G	0.263804	0.114207	0.038544	0.00304639	-0.890483	0.0322558	9.19179e-168	-0.128252	0.0435329	0.00321811	0.237892	20	-0.213576	-0.0429275	0.879632	0.80769	0.957981	0.88(0.808,0.958)	0.803305	2301	2.44063e-155	0.380042	8.22968e-156	0.127656	0.492302	0.794089	0.619958	3.85648
renal_carcinoma	cg00095526	1	CACNA1S	201081686	rs3738263	1	201083506	G	A	0.41002	0.103988	0.035079	0.00303275	0.669944	0.0304962	5.81405e-107	0.155219	0.0528357	0.00330579	0.635342	20	0.051661	0.258777	1.16791	1.05302	1.29534	1.168(1.053,1.295)	0.803305	2467	1.23844e-97	0.38575	4.08684e-98	0.126809	0.487441	0.793555	0.61425	3.8439
renal_carcinoma	cg01987224	1	CACNA1S	201084466	rs3738263	1	201083506	G	A	0.41002	0.103988	0.035079	0.00303275	-0.619957	0.0306938	1.01736e-90	-0.167735	0.0571892	0.00335727	0.490266	20	-0.279826	-0.0556442	0.845578	0.755915	0.945876	0.846(0.756,0.946)	0.803305	2467	3.99125e-82	0.385419	1.3171e-82	0.1267	0.487881	0.793844	0.614581	3.85068
renal_carcinoma	cg20720056	10	ERLIN1	101910498	rs4919429	10	101938630	C	G	0.0715746	0.219575	0.0729377	0.00260867	-0.835455	0.0721308	5.05456e-31	-0.262821	0.0902037	0.00357246	0.160956	7	-0.43962	-0.0860217	0.76888	0.644281	0.917574	0.769(0.644,0.918)	0.803305	1553	0.625447	0.290868	0.0451574	0.0209832	0.0175447	0.455377	0.0385279	0.836133
renal_carcinoma	cg26667550	1	LMNA	156098772	rs568036	1	156110166	G	A	0.0664622	-0.218219	0.0753983	0.00380111	-2.41001	0.0695439	3.81944e-263	0.0905468	0.0313944	0.00392446	0.341728	20	0.0290138	0.15208	1.09477	1.02944	1.16425	1.095(1.029,1.164)	0.803305	1254	3.08103e-214	0.416721	4.47263e-215	0.0599707	0.523308	0.897184	0.583279	8.72607
	cg09152259	2	PROC	128156114	rs35708549	2	128148764	C	T	0.232106	-0.125978	0.0435508	0.00381976	1.10182	0.0312746	6.82384e-272	-0.114337	0.0396593	0.0039394	0.00515859	20	-0.192069	-0.0366048	0.891957	0.82525	0.964057	0.892(0.825,0.964)	0.803305
renal_carcinoma	cg09770475	17	CHRNE	4812443	rs12936083	17	4801887	G	A	0.371166	0.116489	0.0382345	0.00231361	0.303187	0.03454	1.66631e-18	0.384216	0.133489	0.0039987	0.680697	20	0.122578	0.645854	1.46846	1.13041	1.90762	1.468(1.13,1.908)	0.803305	2085	1.2901e-12	0.334032	6.87504e-13	0.177519	0.488449	0.733442	0.665968	2.75153
renal_carcinoma	cg04780086	2	BCL2L11	111875790	rs56952027	2	111877104	T	C	0.466258	-0.109159	0.0343504	0.00148402	0.217919	0.0326424	2.45635e-11	-0.500913	0.174576	0.00411371	0.0837268	17	-0.843082	-0.158744	0.605977	0.430382	0.853215	0.606(0.43,0.853)	0.803305	1102	7.80382e-07	0.28707	2.184e-07	0.079707	0.633222	0.888198	0.712929	7.94437
renal_carcinoma	cg19238380	1	LMNA	156093948	rs568036	1	156110166	G	A	0.0664622	-0.218219	0.0753983	0.00380111	-1.30419	0.0809257	1.973e-58	0.167321	0.0587373	0.00439066	0.490354	17	0.0521959	0.282446	1.18213	1.05358	1.32637	1.182(1.054,1.326)	0.803305	1254	3.26708e-41	0.404808	4.7427e-42	0.0582277	0.536964	0.90217	0.595192	9.22181
renal_carcinoma	cg27182012	1	LMNA	156095157	rs610918	1	156089920	T	C	0.0664622	-0.21265	0.0735126	0.00381943	-1.306	0.0808198	9.74914e-59	0.162825	0.0571831	0.00440725	0.249306	16	0.0507461	0.274904	1.17683	1.05206	1.3164	1.177(1.052,1.316)	0.803305	1254	4.18768e-42	0.363206	6.07911e-43	0.0521408	0.584653	0.91812	0.636794	11.213
renal_carcinoma	cg14190522	9	DAB2IP	124344221	rs657239	9	124330141	C	T	0.169734	-0.143302	0.0494356	0.00374629	0.569129	0.042339	3.42099e-41	-0.251793	0.0888586	0.00460223	0.926736	20	-0.425956	-0.0776301	0.777406	0.653145	0.925307	0.777(0.653,0.925)	0.803305	1686	4.56296e-33	0.397681	9.00162e-34	0.0779285	0.524391	0.870619	0.602319	6.72913
renal_carcinoma	cg23594461	1	CACNA1S	201088537	rs2281845	1	201081943	T	C	0.40593	0.104158	0.0349744	0.00290025	0.28196	0.0322871	2.48248e-18	0.369406	0.131055	0.00482156	0.724538	18	0.112538	0.626274	1.44687	1.11912	1.87063	1.447(1.119,1.871)	0.803305	2467	1.14646e-12	0.37416	3.7833e-13	0.122969	0.502871	0.803514	0.62584	4.08941
renal_carcinoma	cg08885800	1	CACNA1S	201084119	rs3738263	1	201083506	G	A	0.41002	0.103988	0.035079	0.00303275	-0.269838	0.0321313	4.5424e-17	-0.385373	0.137862	0.00518424	0.368603	13	-0.655583	-0.115163	0.680197	0.51914	0.89122	0.68(0.519,0.891)	0.803305	2467	1.51996e-11	0.392061	5.01585e-12	0.1289	0.479038	0.787971	0.607939	3.71635
renal_carcinoma	cg03886523	2	DYSF	71690472	rs10207127	2	71677976	C	T	0.0511247	0.215436	0.0764082	0.0048093	-0.982018	0.0734107	8.23616e-41	-0.219381	0.0795169	0.00579928	0.0374422	5	-0.375234	-0.0635279	0.803016	0.687128	0.938448	0.803(0.687,0.938)	0.803305	2318	5.9469e-05	0.845263	8.8417e-06	0.125642	0.0290263	0.187668	0.154669	0.231023
renal_carcinoma	cg17453456	1	LMNA	156094519	rs10158218	1	156102604	A	C	0.0654397	-0.199943	0.072149	0.00558399	-1.98488	0.077155	6.00396e-146	0.100733	0.0365596	0.0058635	0.23383	20	0.0290762	0.17239	1.10598	1.0295	1.18814	1.106(1.03,1.188)	0.803305	1254	5.274e-113	0.419301	7.65609e-114	0.0603481	0.520351	0.896077	0.580699	8.62249
renal_carcinoma	cg05761882	1	CAPN2	223901187	rs28370029	1	223907538	A	G	0.0480573	0.217628	0.0787328	0.00570742	-1.53321	0.0629795	6.61217e-131	-0.141943	0.0516815	0.00602374	0.498913	14	-0.243239	-0.0406473	0.867671	0.784084	0.960168	0.868(0.784,0.96)	0.803305	1230	4.49506e-107	0.458956	8.05107e-108	0.0817441	0.4593	0.848914	0.541044	5.61875
renal_carcinoma	cg05292330	10	SAR1A	71929509	rs12573097	10	71909903	C	T	0.398773	-0.103536	0.0364961	0.00455545	-0.333874	0.0325365	1.05054e-24	0.310104	0.113411	0.0062508	0.234255	20	0.0878184	0.53239	1.36357	1.09179	1.703	1.364(1.092,1.703)	0.803305	2699	9.0751e-19	0.555501	1.44159e-19	0.0878854	0.356613	0.802282	0.444499	4.05771
renal_carcinoma	cg15892617	1	CACNA1S	201081680	rs7516023	1	201085521	T	C	0.408998	0.0987902	0.0350852	0.00486677	0.297545	0.0315773	4.39377e-21	0.332018	0.123068	0.00697897	0.216116	16	0.0908047	0.573231	1.39378	1.09506	1.77399	1.394(1.095,1.774)	0.803305	2467	2.92887e-15	0.422365	9.66521e-16	0.138941	0.438694	0.759466	0.577635	3.15741
renal_carcinoma	cg23563866	8	SLC39A14	22246575	rs7825432	8	22252285	G	A	0.149284	0.141645	0.0500209	0.00462982	0.382476	0.0452008	2.63491e-17	0.370338	0.137911	0.00724554	0.852246	15	0.100032	0.640644	1.44822	1.10521	1.8977	1.448(1.105,1.898)	0.803305	1846	0.625751	0.0475631	0.288482	0.0219111	0.0162924	0.426463	0.0382035	0.743567
renal_carcinoma	cg16306978	2	APOB	21266953	rs515135	2	21286057	T	C	0.206544	-0.126762	0.0469127	0.00689062	-0.763894	0.0411597	6.86473e-77	0.165942	0.06206	0.00749762	0.781635	20	0.0443044	0.28758	1.1805	1.0453	1.3332	1.181(1.045,1.333)	0.803305	1845	1.34239e-66	0.503162	3.56647e-67	0.133317	0.36352	0.731668	0.496838	2.72673
renal_carcinoma	cg25071744	2	APOB	21266995	rs515135	2	21286057	T	C	0.206544	-0.126762	0.0469127	0.00689062	-0.715861	0.0416066	2.41632e-66	0.177076	0.0663365	0.00759945	0.642536	20	0.0470565	0.307096	1.19372	1.04818	1.35947	1.194(1.048,1.359)	0.803305	1845	1.03489e-56	0.514895	2.7495e-57	0.136449	0.348656	0.718723	0.485105	2.55521
renal_carcinoma	cg25035485	2	APOB	21266500	rs515135	2	21286057	T	C	0.206544	-0.126762	0.0469127	0.00689062	-0.708526	0.0416557	7.03158e-65	0.17891	0.0670419	0.00761634	0.838638	20	0.0475079	0.310312	1.19591	1.04865	1.36385	1.196(1.049,1.364)	0.803305	1845	2.25467e-55	0.503236	5.99024e-56	0.133337	0.363427	0.731589	0.496764	2.72563
renal_carcinoma	cg24309555	2	APOB	21266956	rs515135	2	21286057	T	C	0.206544	-0.126762	0.0469127	0.00689062	-0.685218	0.0419087	4.33053e-60	0.184995	0.0693925	0.0076777	0.790155	20	0.0489857	0.321004	1.20321	1.05021	1.37851	1.203(1.05,1.379)	0.803305	1845	7.20726e-51	0.503427	1.91483e-51	0.133388	0.363185	0.731383	0.496573	2.72278
renal_carcinoma	cg03350299	2	APOB	21266960	rs515135	2	21286057	T	C	0.206544	-0.126762	0.0469127	0.00689062	-0.667986	0.0420077	6.18598e-57	0.189768	0.0712368	0.00772409	0.711703	20	0.0501439	0.329392	1.20897	1.05142	1.39012	1.209(1.051,1.39)	0.803305	1845	5.73658e-48	0.504086	1.5241e-48	0.133564	0.36235	0.730671	0.495914	2.71294
renal_carcinoma	cg16723488	2	APOB	21266947	rs515135	2	21286057	T	C	0.206544	-0.126762	0.0469127	0.00689062	-0.654991	0.0421109	1.49588e-54	0.193533	0.0726962	0.00776293	0.794095	20	0.0510484	0.336018	1.21353	1.05237	1.39936	1.214(1.052,1.399)	0.803305	1845	6.67156e-46	0.505605	1.77251e-46	0.133969	0.360426	0.729024	0.494395	2.69036
renal_carcinoma	cg05337441	2	APOB	21266568	rs515135	2	21286057	T	C	0.206544	-0.126762	0.0469127	0.00689062	-0.645978	0.0423698	1.74536e-52	0.196233	0.0737545	0.00779965	0.817342	20	0.0516742	0.340792	1.21681	1.05303	1.40606	1.217(1.053,1.406)	0.803305	1845	9.05074e-44	0.504843	2.40461e-44	0.133766	0.361391	0.729852	0.495157	2.70167
renal_carcinoma	cg00453258	10	CALHM1	105219172	rs79039404	10	105290489	A	G	0.0490798	0.21396	0.0796883	0.00725396	-1.39277	0.0816345	2.89352e-65	-0.153622	0.0579199	0.00799427	0.80752	19	-0.267145	-0.040099	0.857596	0.765562	0.960694	0.858(0.766,0.961)	0.803305	1575	2.6515e-46	0.500701	4.44357e-47	0.0834952	0.415804	0.832775	0.499299	4.97997
renal_carcinoma	cg27230496	1	SOAT1	179262989	rs12568258	1	179305488	T	C	0.273006	0.114494	0.0401277	0.00432751	-0.272551	0.0379971	7.33988e-13	-0.420083	0.15845	0.00802067	0.30056	5	-0.730645	-0.109521	0.656992	0.481598	0.896263	0.657(0.482,0.896)	0.803305	2787	1.41549e-07	0.437242	5.65064e-08	0.174158	0.388599	0.690527	0.562758	2.2313
renal_carcinoma	cg16374910	1	CACNA1S	201084995	rs2281845	1	201081943	T	C	0.40593	0.104158	0.0349744	0.00290025	-0.181322	0.0316787	1.04173e-08	-0.574435	0.217432	0.0082441	0.158385	9	-1.0006	-0.148268	0.563023	0.367658	0.8622	0.563(0.368,0.862)	0.803305	2467	0.00080339	0.412753	0.000265117	0.135757	0.450422	0.768403	0.586179	3.31785
renal_carcinoma	cg08881019	1	LMNA	156096178	rs2908712	1	156102100	A	C	0.0654397	-0.205107	0.0738836	0.00550191	0.682866	0.0823142	1.07815e-16	-0.300362	0.114094	0.00847369	0.0446575	6	-0.523986	-0.0767378	0.74055	0.592155	0.926133	0.741(0.592,0.926)	0.803305	1254	9.51286e-10	0.39827	1.38095e-10	0.0572711	0.544459	0.904823	0.60173	9.5067
renal_carcinoma	cg23012579	5	ERGIC1	172359545	rs2431213	5	172356957	A	G	0.394683	0.09278	0.0348273	0.00772178	0.551044	0.0322035	1.2227e-65	0.168371	0.0639638	0.00848117	0.171681	20	0.043002	0.29374	1.18338	1.04394	1.34144	1.183(1.044,1.341)	0.803305	1424	0.288746	0.0292649	0.604324	0.0612328	0.0164321	0.211577	0.0776649	0.268354
renal_carcinoma	cg26487948	5	ERGIC1	172359575	rs2431213	5	172356957	A	G	0.394683	0.09278	0.0348273	0.00772178	0.51802	0.0325588	5.37706e-57	0.179105	0.0681676	0.00860343	0.157133	20	0.0454965	0.312713	1.19615	1.04655	1.36713	1.196(1.047,1.367)	0.803305	1424	0.272442	0.0440763	0.570201	0.0922274	0.0210534	0.185852	0.113281	0.228278
renal_carcinoma	cg05392737	1	TOR1AIP2	179784720	rs2794587	1	179772569	G	A	0.384458	-0.0939632	0.0352591	0.00770027	0.508284	0.0327066	1.83897e-54	-0.184864	0.0703813	0.00862431	0.0794008	20	-0.322811	-0.0469167	0.831217	0.72411	0.954167	0.831(0.724,0.954)	0.803305	2806	5.14261e-47	0.502332	2.05985e-47	0.20091	0.296758	0.596298	0.497668	1.47707
renal_carcinoma	cg00924631	2	TRAPPC12	3395801	rs11684337	2	3395287	G	A	0.376278	0.101903	0.0357729	0.00439119	0.220939	0.0331289	2.57427e-11	0.461226	0.176065	0.00880234	0.153094	13	0.116139	0.806313	1.58602	1.12315	2.23964	1.586(1.123,2.24)	0.803305	2382	2.17149e-06	0.464039	3.31396e-07	0.0703526	0.465606	0.868735	0.535959	6.61818
renal_carcinoma	cg05373875	20	SEC23B	18485171	rs6081288	20	18652719	G	A	0.333333	0.11232	0.0403602	0.00538711	-0.268674	0.0351225	2.01548e-14	-0.418051	0.159852	0.00891649	0.17431	20	-0.731361	-0.104741	0.658329	0.481254	0.900558	0.658(0.481,0.901)	0.803305	2473	5.98179e-10	0.571769	2.48551e-10	0.237386	0.190845	0.445659	0.428231	0.803943
renal_carcinoma	cg00262681	5	MAPK9	179720254	rs7702282	5	179720255	A	G	0.295501	0.101715	0.0388581	0.00885474	-0.96035	0.031633	1.9045e-202	-0.105915	0.0406125	0.00910899	0.633352	20	-0.185515	-0.0263145	0.899501	0.830676	0.974029	0.9(0.831,0.974)	0.803305	1062	0.838038	0.125797	0.0283263	0.00424843	0.00359049	0.458034	0.00783892	0.845134
renal_carcinoma	cg19765450	1	CACNA1S	201081382	rs3738263	1	201083506	G	A	0.41002	0.103988	0.035079	0.00303275	0.175941	0.0322058	4.68111e-08	0.59104	0.226842	0.00917349	0.581518	6	0.14643	1.03565	1.80587	1.15769	2.81694	1.806(1.158,2.817)	0.803305	2467	0.00121693	0.28625	0.000401583	0.0938438	0.618287	0.868221	0.712131	6.58847
	cg04548956	11	SERPINH1	75298463	rs7482921	11	75357570	C	G	0.0480573	-0.234793	0.0809569	0.00372894	-0.468695	0.0797244	4.12894e-09	0.500951	0.192603	0.00929664			0.123449	0.878453	1.65029	1.13139	2.40717	1.65(1.131,2.407)	0.803305
renal_carcinoma	cg22202357	6	MICB	31475762	rs13192469	6	31526856	C	T	0.0439673	-0.212112	0.075894	0.00519242	-0.531522	0.0807879	4.72892e-11	0.399066	0.155135	0.0101005	0.707833	5	0.0950014	0.703131	1.49043	1.09966	2.02007	1.49(1.1,2.02)	0.811859	2320	0.0506007	0.672533	0.0180643	0.240074	0.0187281	0.0723644	0.258802	0.0780095
renal_carcinoma	cg00776917	14	PRKD1	30691759	rs1956467	14	30691706	T	C	0.43865	-0.0934317	0.0356111	0.0086988	0.340471	0.0320316	2.17884e-26	-0.274419	0.107733	0.0108585	0.159253	10	-0.485576	-0.0632623	0.760014	0.615343	0.938697	0.76(0.615,0.939)	0.811859	1251	0.829986	0.102346	0.0559266	0.0068915	0.00484925	0.413027	0.0117407	0.703656
renal_carcinoma	cg24386596	20	VAPB	56964081	rs4811990	20	56962515	G	C	0.255624	0.0999591	0.0381981	0.0088742	0.385766	0.0348675	1.88044e-28	0.259118	0.101751	0.0108779	0.23214	19	0.059686	0.45855	1.29579	1.0615	1.58178	1.296(1.062,1.582)	0.811859	1162	0.899023	0.0432233	0.0529393	0.00254295	0.00227139	0.471797	0.00481434	0.893212
renal_carcinoma	cg01616178	8	ANK1	41755140	rs9650321	8	41763767	A	G	0.462168	-0.0955187	0.0357175	0.00748889	-0.262093	0.0314415	7.69076e-17	0.364446	0.143119	0.0108825	0.143789	13	0.0839328	0.644959	1.43972	1.08756	1.90591	1.44(1.088,1.906)	0.811859	1657	3.5823e-11	0.587716	7.61807e-12	0.124695	0.287588	0.697549	0.412284	2.30632
renal_carcinoma	cg04601775	6	HLA-DRB1	32557478	rs9271147	6	32577385	T	C	0.137014	-0.165582	0.0647655	0.0105687	-1.05081	0.038528	8.64726e-164	0.157576	0.061904	0.0109126	0.174574	20	0.0362442	0.278908	1.17067	1.03691	1.32169	1.171(1.037,1.322)	0.811859	8082	5.34125e-207	0.463014	5.87501e-207	0.509256	0.0277303	0.0516406	0.536986	0.0544525
renal_carcinoma	cg14206848	20	VAPB	56964089	rs6092640	20	56961459	G	A	0.256646	0.100073	0.0382837	0.00894902	0.367299	0.0346093	2.60038e-26	0.272458	0.107346	0.0111444	0.105947	20	0.0620598	0.482856	1.31319	1.06403	1.6207	1.313(1.064,1.621)	0.811859	1162	0.87323	0.0680662	0.0514205	0.00400482	0.0032782	0.450115	0.00728302	0.818563
renal_carcinoma	cg24514884	6	SGK1	134639203	rs229131	6	134643847	T	C	0.333333	-0.095529	0.0359224	0.00782989	0.277641	0.0332446	6.74237e-17	-0.344074	0.135785	0.0112783	0.206537	20	-0.610213	-0.0779354	0.708876	0.543235	0.925024	0.709(0.543,0.925)	0.811859	1693	0.593794	0.304865	0.0594641	0.0305186	0.0113591	0.271245	0.0418778	0.372203
renal_carcinoma	cg13066889	2	DYSF	71695782	rs13385371	2	71695283	C	T	0.173824	0.114103	0.0444375	0.0102373	0.576583	0.0400634	5.82927e-47	0.197894	0.0782875	0.0114782	0.0198304	20	0.0444505	0.351338	1.21883	1.04545	1.42097	1.219(1.045,1.421)	0.811859	2304	6.65377e-11	0.851021	9.84906e-12	0.125947	0.0230315	0.154596	0.148979	0.182866
renal_carcinoma	cg09203490	14	RTN1	60098107	rs58819707	14	60045393	A	G	0.200409	-0.12282	0.0440333	0.00528296	-0.245105	0.04166	4.01785e-09	0.501091	0.198817	0.0117234	0.838977	16	0.11141	0.890772	1.65052	1.11785	2.43701	1.651(1.118,2.437)	0.811859	2175	0.000135199	0.54581	3.86584e-05	0.155769	0.298246	0.656908	0.454016	1.91467
renal_carcinoma	cg04179148	14	SERPINA1	94858339	rs2402446	14	94866137	T	A	0.470348	-0.0912825	0.0350996	0.00930417	-0.326785	0.0319914	1.70271e-24	0.279335	0.110835	0.0117265	0.60744	18	0.0620984	0.496572	1.32225	1.06407	1.64308	1.322(1.064,1.643)	0.811859	1828	0.738768	0.0586146	0.180205	0.0142895	0.00812206	0.362404	0.0224116	0.568392
renal_carcinoma	cg01126576	10	PRDX3	120949145	rs10430698	10	120952835	C	T	0.294479	0.102548	0.0377739	0.00663204	0.232075	0.0343678	1.45133e-11	0.441873	0.175427	0.0117742	0.838475	10	0.0980361	0.78571	1.55562	1.103	2.19396	1.556(1.103,2.194)	0.811859	1988	1.12053e-06	0.357228	1.41737e-06	0.451672	0.191097	0.297303	0.642769	0.423089
renal_carcinoma	cg25989216	5	ERGIC1	172359526	rs485710	5	172350638	A	G	0.393661	0.0895893	0.0346445	0.00971078	0.344713	0.0326952	5.45927e-26	0.259895	0.103481	0.0120213	0.291776	20	0.0570722	0.462718	1.29679	1.05873	1.58838	1.297(1.059,1.588)	0.811859	1424	0.193147	0.124776	0.404243	0.261129	0.0167055	0.0601275	0.277835	0.0639741
renal_carcinoma	cg19891728	8	ANK1	41754871	rs4737021	8	41751299	A	G	0.468303	-0.0897576	0.0346564	0.00959954	-0.324786	0.0327202	3.20346e-23	0.276359	0.110278	0.0122095	0.0749706	14	0.0602141	0.492504	1.31832	1.06206	1.63641	1.318(1.062,1.636)	0.811859	1657	7.9351e-17	0.611313	1.68747e-17	0.129742	0.258945	0.666204	0.388687	1.99584
renal_carcinoma	cg26706521	6	HLA-B	31325085	rs9266242	6	31325620	T	C	0.266871	-0.107265	0.042714	0.0120309	0.782343	0.0307905	2.02564e-142	-0.137107	0.0548635	0.0124523	0.217934	20	-0.244639	-0.0295745	0.871877	0.782987	0.970859	0.872(0.783,0.971)	0.811859	1220	4.11803e-40	0.761687	1.15943e-40	0.214429	0.0238844	0.100223	0.238313	0.111386
renal_carcinoma	cg19105362	10	SAR1A	71929497	rs10823488	10	71901022	G	A	0.411043	-0.0932909	0.0360899	0.00973912	-0.315356	0.0323756	2.02468e-22	0.295827	0.118403	0.012473	0.636091	20	0.0637571	0.527897	1.34424	1.06583	1.69536	1.344(1.066,1.695)	0.811859	2699	1.49838e-16	0.580172	2.38019e-17	0.0918329	0.327996	0.781261	0.419828	3.57166
renal_carcinoma	cg17554194	6	HLA-B	31324972	rs9266242	6	31325620	T	C	0.266871	-0.107265	0.042714	0.0120309	-0.584951	0.0298663	2.04929e-85	0.183374	0.0736192	0.0127439	0.153674	20	0.0390804	0.327668	1.20126	1.03985	1.38773	1.201(1.04,1.388)	0.811859	1220	2.44056e-23	0.760221	6.87139e-24	0.214014	0.0257649	0.107453	0.239779	0.120389
renal_carcinoma	cg00555085	16	JPH3	87616248	rs4843627	16	87583194	C	A	0.316973	0.0959925	0.0370995	0.0096693	0.313706	0.0343041	5.97135e-20	0.305995	0.122904	0.0127851	0.560802	20	0.0651032	0.546887	1.35798	1.06727	1.72787	1.358(1.067,1.728)	0.811859	2380	0.750015	0.122424	0.103901	0.0169531	0.00670637	0.283454	0.0236594	0.395584
renal_carcinoma	cg00188032	5	ERAP1	96141721	rs41135	5	96166026	C	T	0.465235	-0.0935867	0.0341282	0.0061027	-0.18462	0.0312036	3.28607e-09	0.506915	0.203746	0.0128471	0.196493	6	0.107573	0.906257	1.66016	1.11357	2.47504	1.66(1.114,2.475)	0.811859	2485	0.000328101	0.747796	6.35109e-05	0.144645	0.107168	0.425587	0.251813	0.740906
renal_carcinoma	cg19844326	8	ANK1	41755409	rs11989207	8	41739152	T	C	0.465235	-0.0933683	0.0354074	0.0083649	-0.231331	0.0317125	2.99484e-13	0.403613	0.162753	0.0131415	0.130204	4	0.0846171	0.722609	1.49722	1.0883	2.0598	1.497(1.088,2.06)	0.818249	1657	8.53546e-08	0.584664	1.81514e-08	0.124043	0.291293	0.701343	0.415336	2.34833
renal_carcinoma	cg15225267	6	HLA-C	31276187	rs9266232	6	31325424	G	T	0.265849	-0.106989	0.0426217	0.0120666	-0.428198	0.0327242	4.00802e-39	0.249858	0.101352	0.0136922	0.0805242	20	0.0512081	0.448508	1.28384	1.05254	1.56597	1.284(1.053,1.566)	0.840183	912	1.59367e-13	0.733917	4.35213e-14	0.200358	0.0657249	0.247009	0.266083	0.328037
renal_carcinoma	cg20716080	15	CLN6	68522777	rs1554223	15	68545603	G	A	0.439673	-0.0911634	0.036948	0.0136119	0.815986	0.0294357	3.90274e-169	-0.111722	0.0454592	0.0139857	0.890408	20	-0.200822	-0.022622	0.894293	0.818058	0.977632	0.894(0.818,0.978)	0.845937	1177	0.890968	0.055948	0.0473135	0.00296823	0.00280268	0.485656	0.00577091	0.944226
renal_carcinoma	cg12089439	8	TUSC3	15398333	rs35130332	8	15487843	G	A	0.464213	0.0865312	0.0345954	0.0123763	0.323151	0.0321893	1.02617e-23	0.267773	0.110329	0.0152228	0.953651	20	0.0515282	0.484018	1.30705	1.05288	1.62258	1.307(1.053,1.623)	0.884448	1740	0.736486	0.0538884	0.188268	0.0137679	0.00759018	0.355377	0.0213581	0.551295
renal_carcinoma	cg07363185	2	APOB	21346839	rs11687710	2	21371068	C	T	0.297546	0.09909	0.0371629	0.00766758	0.195307	0.0333891	4.93258e-09	0.507355	0.209116	0.0152582	0.558554	4	0.0974876	0.917222	1.66089	1.1024	2.50233	1.661(1.102,2.502)	0.884448	1845	0.00026264	0.621303	6.97785e-05	0.164855	0.21351	0.564297	0.378365	1.29514
renal_carcinoma	cg14348540	8	SLC39A14	22224272	rs4871996	8	22257302	C	T	0.165644	0.119869	0.0480068	0.0125279	0.463517	0.046248	1.21497e-23	0.258607	0.106736	0.015399	0.637158	16	0.0494044	0.46781	1.29512	1.05065	1.59649	1.295(1.051,1.596)	0.884448	1730	0.593351	0.0578773	0.271209	0.0264034	0.0511596	0.659588	0.0775631	1.93761
	cg09331409	11	SERPINH1	75315116	rs61895123	11	75329816	C	A	0.0531697	-0.236821	0.0883994	0.00738441	0.451335	0.0797376	1.51153e-08	-0.524713	0.216692	0.015458			-0.949429	-0.0999967	0.591725	0.386962	0.90484	0.592(0.387,0.905)	0.884448
renal_carcinoma	cg18669823	7	CRHR2	30725669	rs62446897	7	30729574	A	G	0.0838446	-0.172169	0.0715686	0.0161434	-2.25033	0.0363948	0	0.0765085	0.0318277	0.016224	0.387219	20	0.0141262	0.138891	1.07951	1.01423	1.149	1.08(1.014,1.149)	0.905922	2138	0	0.654404	0	0.0589187	0.286677	0.829515	0.345596	4.86563
renal_carcinoma	cg16061436	1	IL10	206910867	rs12137965	1	206911180	G	C	0.245399	0.105234	0.0432649	0.0150023	-0.556207	0.0381678	4.19179e-48	-0.1892	0.0788617	0.0164339	0.675477	20	-0.343769	-0.0346311	0.827621	0.709093	0.965962	0.828(0.709,0.966)	0.905922	344	0.944816	0.039028	0.0138114	0.000568741	0.00177535	0.757373	0.00234409	3.12155
renal_carcinoma	cg04981410	6	HLA-B	31325427	rs2523587	6	31327400	T	C	0.265849	-0.0990814	0.0410363	0.0157575	-0.617162	0.0298875	9.86514e-95	0.160544	0.0669449	0.0164782	0.301571	20	0.029332	0.291756	1.17415	1.02977	1.33878	1.174(1.03,1.339)	0.905922	1224	8.40467e-16	0.733204	2.36711e-16	0.206441	0.0603549	0.226221	0.266796	0.292359
renal_carcinoma	cg24935556	2	APOB	21291088	rs668948	2	21291529	G	A	0.206544	-0.120674	0.0471883	0.0105494	0.293092	0.0431206	1.06794e-11	-0.411726	0.17202	0.0166892	0.298491	9	-0.748885	-0.0745668	0.662506	0.472893	0.928145	0.663(0.473,0.928)	0.905922	1845	1.36874e-06	0.51023	3.63649e-07	0.135204	0.354564	0.723943	0.489768	2.62243
renal_carcinoma	cg16626884	2	DYSF	71693389	rs75463085	2	71696040	T	C	0.163599	0.114322	0.045281	0.0115789	-0.29774	0.041506	7.31461e-13	-0.383966	0.161227	0.0172411	0.848104	8	-0.699971	-0.0679611	0.681155	0.4966	0.934297	0.681(0.497,0.934)	0.910824	2312	0.591688	0.260966	0.0878393	0.0387211	0.0207849	0.34929	0.059506	0.536784
renal_carcinoma	cg09788352	15	CLN6	68522666	rs12148307	15	68542205	G	C	0.443763	-0.0882241	0.0368508	0.0166617	0.634547	0.0309725	2.78849e-93	-0.139035	0.0584694	0.0174111	0.809484	20	-0.253635	-0.024435	0.870198	0.775975	0.975861	0.87(0.776,0.976)	0.910824	1177	0.85359	0.0921147	0.0453286	0.00488753	0.00407877	0.4549	0.00896631	0.834526
renal_carcinoma	cg14394126	4	STIM2	27005430	rs4692137	4	27005235	G	A	0.48773	0.084906	0.0346186	0.0141822	-0.296534	0.0321409	2.80776e-20	-0.286328	0.120799	0.0177741	0.167991	20	-0.523094	-0.049562	0.751016	0.592684	0.951646	0.751(0.593,0.952)	0.910824	1536	6.38603e-14	0.707922	6.47456e-15	0.0715532	0.220525	0.75502	0.292078	3.08197
renal_carcinoma	cg00891176	1	CACNA1S	201082731	rs2057579	1	201099275	C	T	0.404908	0.0909302	0.0355664	0.010569	0.202167	0.03211	3.05282e-10	0.449778	0.189877	0.0178466	0.189607	11	0.0776191	0.821937	1.56796	1.08071	2.2749	1.568(1.081,2.275)	0.910824	2467	4.32245e-05	0.532462	1.4264e-05	0.175419	0.292061	0.624755	0.46748	1.66493
renal_carcinoma	cg05989746	2	TRAPPC12	3425584	rs12476309	2	3404845	G	A	0.359918	0.0900615	0.0355135	0.0112133	0.210274	0.0323476	8.00804e-11	0.428305	0.181289	0.0181492	0.395009	9	0.0729786	0.783631	1.53465	1.07571	2.18941	1.535(1.076,2.189)	0.910824	2382	4.49658e-06	0.610847	6.86235e-07	0.0929268	0.296221	0.761204	0.389148	3.18768
renal_carcinoma	cg16788656	16	JPH3	87616174	rs28702654	16	87616169	C	G	0.281186	0.0929619	0.0378247	0.0139828	0.287249	0.0349941	2.23992e-16	0.323628	0.137455	0.0185509	0.722605	20	0.0542162	0.59304	1.38213	1.05571	1.80948	1.382(1.056,1.809)	0.910824	2380	0.741314	0.131213	0.102696	0.0181706	0.00660647	0.266636	0.0247771	0.363579
renal_carcinoma	cg16785344	12	PXN	120703817	rs3956833	12	120705828	C	A	0.116564	-0.129046	0.0536994	0.0162563	-0.570589	0.0502682	7.34138e-30	0.226162	0.0961983	0.018723	0.83647	10	0.0376133	0.414711	1.25378	1.03833	1.51393	1.254(1.038,1.514)	0.910824	2097	0.512555	0.382209	0.0444454	0.0331149	0.0276757	0.455263	0.0607906	0.835747
renal_carcinoma	cg00583328	8	ANK1	41753348	rs4737021	8	41751299	A	G	0.468303	-0.0897576	0.0346564	0.00959954	-0.183177	0.0327115	2.14623e-08	0.490005	0.208452	0.0187389	0.245348	12	0.0814391	0.898571	1.63232	1.08485	2.45609	1.632(1.085,2.456)	0.910824	1657	0.00164116	0.612261	0.000349007	0.129947	0.255802	0.663131	0.385749	1.96851
renal_carcinoma	cg11747817	18	MPPE1	11912416	rs8093997	18	11911411	A	G	0.298569	-0.0897522	0.0381766	0.0187245	-1.29877	0.0239064	0	0.0691055	0.029422	0.0188354	0.57583	20	0.0114384	0.126773	1.07155	1.0115	1.13516	1.072(1.012,1.135)	0.910824	1536	0.820337	0.107423	0.0599325	0.00784365	0.00446482	0.362743	0.0123085	0.569227
renal_carcinoma	cg11826475	12	PXN	120704006	rs3956833	12	120705828	C	A	0.116564	-0.129046	0.0536994	0.0162563	-0.524437	0.0493609	2.29112e-26	0.246065	0.104981	0.0190832	0.434489	7	0.0403022	0.451828	1.27898	1.04113	1.57118	1.279(1.041,1.571)	0.910824	2097	0.533659	0.373784	0.0462753	0.0323982	0.0138832	0.299974	0.0462814	0.428519
renal_carcinoma	cg09064252	2	DYSF	71693090	rs58981291	2	71693805	C	T	0.161554	0.110226	0.0454539	0.0153081	0.368589	0.0423928	3.48006e-18	0.299049	0.128025	0.0194989	0.0478676	14	0.04812	0.549978	1.34858	1.0493	1.73321	1.349(1.049,1.733)	0.910824	2312	0.0749628	0.776191	0.0111286	0.115207	0.0225106	0.163455	0.137718	0.195392
renal_carcinoma	cg27156259	12	PXN	120688673	rs11065064	12	120707989	T	C	0.112474	-0.132617	0.0547694	0.0154621	-0.42333	0.0508306	8.204e-17	0.313271	0.134735	0.0200669	0.797683	12	0.0491904	0.577352	1.36789	1.05042	1.78131	1.368(1.05,1.781)	0.910824	2062	0.744026	0.171269	0.0634885	0.014608	0.0066086	0.311483	0.0212166	0.452398
renal_carcinoma	cg22576950	15	CLN6	68522787	rs11071996	15	68531108	A	T	0.443763	-0.0849315	0.0364154	0.0196851	0.852389	0.0291746	1.18587e-187	-0.0996393	0.0428575	0.0200773	0.834806	20	-0.18364	-0.0156386	0.905164	0.832235	0.984483	0.905(0.832,0.984)	0.910824	1178	0.891137	0.0558696	0.0473495	0.00296589	0.00267789	0.474485	0.00564377	0.902897
renal_carcinoma	cg07917478	1	TOR1AIP2	179786966	rs2777912	1	179787605	G	A	0.303681	-0.0854241	0.0364584	0.0191265	0.627216	0.0336283	1.22999e-77	-0.136196	0.0585842	0.0200835	0.0334706	20	-0.251021	-0.021371	0.872672	0.778006	0.978856	0.873(0.778,0.979)	0.910824	2806	1.92063e-68	0.603929	7.693e-69	0.241747	0.154324	0.389638	0.396071	0.638373
renal_carcinoma	cg26975524	8	CLN8	1713012	rs6982516	8	1716047	A	G	0.187117	-0.116446	0.0491745	0.0178836	0.523812	0.0433794	1.42911e-33	-0.222305	0.0956663	0.0201385	0.0594235	20	-0.409811	-0.0347991	0.800671	0.663776	0.965799	0.801(0.664,0.966)	0.910824	3202	3.08096e-26	0.747787	4.92785e-27	0.119472	0.132741	0.526305	0.252213	1.11106
renal_carcinoma	cg00174851	7	AKR1B1	134142981	rs1646764	7	134216444	G	C	0.447853	0.0845318	0.0346753	0.0147764	-0.238012	0.0322908	1.69505e-13	-0.355158	0.153448	0.0206398	0.725476	20	-0.655916	-0.0543999	0.701063	0.518966	0.947053	0.701(0.519,0.947)	0.910824	980	0.867103	0.0309063	0.0956868	0.00340769	0.00289669	0.459473	0.00630438	0.850048
renal_carcinoma	cg21279459	6	HLA-B	31324491	rs9266250	6	31325792	A	G	0.305726	-0.0952019	0.041265	0.0210501	-0.815611	0.0277845	2.06955e-189	0.116725	0.05075	0.0214486	0.0534834	20	0.017255	0.216195	1.12381	1.0174	1.24134	1.124(1.017,1.241)	0.910824	1215	1.30213e-41	0.761642	3.6642e-42	0.214303	0.024056	0.100923	0.238358	0.112252
renal_carcinoma	cg17583957	17	MAP2K6	67536299	rs3952613	17	67550367	T	C	0.349693	-0.091943	0.0376074	0.0144929	0.231295	0.0341858	1.32562e-11	-0.397514	0.172885	0.0214878	0.940087	5	-0.736369	-0.0586594	0.671989	0.47885	0.943028	0.672(0.479,0.943)	0.910824	1761	0.665016	0.088338	0.210077	0.0278971	0.00867204	0.237141	0.0365691	0.310858
renal_carcinoma	cg12367389	13	HTR2A	47468154	rs2070040	13	47467626	A	G	0.399796	0.0845447	0.0348374	0.0152313	0.233243	0.032859	1.26312e-12	0.362475	0.157849	0.0216568	0.489422	15	0.053091	0.671859	1.43688	1.05453	1.95787	1.437(1.055,1.958)	0.910824	2004	4.73686e-07	0.541642	3.07263e-07	0.351236	0.107121	0.233707	0.458358	0.304984
renal_carcinoma	cg21407899	3	ITPR1	4867340	rs1051559	3	4867510	G	A	0.172802	-0.0990693	0.0419111	0.0180889	0.38632	0.040996	4.36894e-21	-0.256444	0.111849	0.0218618	0.900309	12	-0.475668	-0.03722	0.773798	0.62147	0.963464	0.774(0.621,0.963)	0.910824	1572	0.704486	0.0477979	0.222899	0.0151135	0.00970424	0.39102	0.0248178	0.64209
renal_carcinoma	cg14973360	2	YWHAQ	9800511	rs4669407	2	9797994	T	C	0.179959	0.103362	0.044456	0.0200693	-0.536952	0.0415216	2.97474e-38	-0.192498	0.0841207	0.0221167	0.393511	8	-0.357375	-0.0276214	0.824896	0.69951	0.972757	0.825(0.7,0.973)	0.910824	2297	4.08864e-30	0.712932	4.81732e-31	0.083796	0.203272	0.708097	0.287068	2.42579
renal_carcinoma	cg15952994	10	ZDHHC6	114206714	rs3824624	10	114206754	G	C	0.290389	0.0917836	0.0399822	0.021698	0.696886	0.0343033	9.39485e-92	0.131705	0.0577377	0.0225428	0.429913	20	0.0185391	0.244871	1.14077	1.01871	1.27746	1.141(1.019,1.277)	0.910824	1386	1.62809e-81	0.751871	1.35095e-82	0.0622023	0.185927	0.749315	0.248129	2.98907
renal_carcinoma	cg24599065	2	CASP8	202093848	rs2037815	2	202101715	G	A	0.48364	-0.0795066	0.0348	0.022332	-0.792805	0.0294362	9.02519e-160	0.100285	0.0440524	0.0228162	0.0253333	20	0.0139423	0.186628	1.10549	1.01404	1.20518	1.105(1.014,1.205)	0.910824	1555	2.46287e-12	0.905307	2.00729e-13	0.0737636	0.0209295	0.221024	0.0946931	0.283737
renal_carcinoma	cg04399631	3	PPARG	12269362	rs17793495	3	12227577	A	G	0.0531697	-0.187142	0.0805804	0.0202101	0.959135	0.0839759	3.26364e-30	-0.195115	0.0857329	0.0228548	0.257437	18	-0.363151	-0.0270785	0.82274	0.695481	0.973285	0.823(0.695,0.973)	0.910824	1894	1.10444e-18	0.620294	1.99125e-19	0.111568	0.268138	0.706172	0.379706	2.40335
renal_carcinoma	cg17976121	11	CCND1	69451115	rs1352075	11	69457293	T	C	0.511247	0.0803878	0.0351624	0.0222435	-0.474109	0.0309698	6.68095e-53	-0.169555	0.0749877	0.0237525	0.363896	20	-0.316531	-0.0225791	0.84404	0.728673	0.977674	0.844(0.729,0.978)	0.910824	2062	4.24917e-48	0.00154092	2.75228e-45	0.998091	0.000368282	0.00036885	0.998459	0.000368986
renal_carcinoma	cg20394284	9	JAK2	4984206	rs10758669	9	4981602	C	A	0.354806	-0.0817944	0.0359164	0.0227649	0.60539	0.0325707	4.09647e-77	-0.13511	0.0597714	0.0237932	0.599188	20	-0.252262	-0.0179581	0.87362	0.777041	0.982202	0.874(0.777,0.982)	0.910824	2635	0.316048	0.476685	0.0761086	0.114776	0.0163821	0.124904	0.131158	0.142731
renal_carcinoma	cg03480583	15	CLN6	68524819	rs12148307	15	68542205	G	C	0.443763	-0.0882241	0.0368508	0.0166617	0.221932	0.0323851	7.23674e-12	-0.397528	0.175887	0.0238128	0.644145	6	-0.742267	-0.0527895	0.671979	0.476034	0.94858	0.672(0.476,0.949)	0.910824	1183	0.886769	0.0599999	0.0472849	0.00319661	0.00274963	0.462415	0.00594624	0.86017
renal_carcinoma	cg00476054	13	DLEU2	50705383	rs706610	13	50715734	C	T	0.445808	0.080022	0.0345532	0.0205634	-0.305276	0.0295311	4.7707e-25	-0.26213	0.115992	0.0238281	0.135318	20	-0.489474	-0.0347857	0.769411	0.612949	0.965812	0.769(0.613,0.966)	0.910824	1675	2.12393e-18	0.751296	2.1645e-19	0.0763925	0.172312	0.692838	0.248704	2.25561
renal_carcinoma	cg06164712	16	JPH3	87584709	rs9939461	16	87584748	G	A	0.388548	-0.0836128	0.0364118	0.021658	0.404532	0.0322895	5.22876e-36	-0.20669	0.0915091	0.023903	0.64307	20	-0.386048	-0.0273322	0.813272	0.679738	0.973038	0.813(0.68,0.973)	0.910824	2463	3.73888e-05	0.843631	5.35002e-06	0.120681	0.0356459	0.228022	0.156327	0.295374
renal_carcinoma	cg23838231	2	CYP1B1	38306612	rs4646430	2	38306415	G	C	0.290389	-0.0856855	0.0376872	0.0229903	-0.669057	0.0357157	2.67313e-78	0.128069	0.0567422	0.024006	0.507153	20	0.0168543	0.239284	1.13663	1.017	1.27034	1.137(1.017,1.27)	0.910824	2543	4.63389e-69	0.631844	1.6951e-69	0.230994	0.137162	0.372565	0.368156	0.593791
renal_carcinoma	cg03555881	6	HLA-C	31275551	rs35303934	6	31234222	A	G	0.127812	0.138728	0.0609427	0.0228238	-0.848675	0.0503898	1.1969e-63	-0.163464	0.0724621	0.0240795	0.0678159	20	-0.30549	-0.0214383	0.849197	0.736762	0.97879	0.849(0.737,0.979)	0.910824	908	4.32785e-11	0.770032	1.1815e-11	0.210198	0.0197694	0.0859661	0.229968	0.0940514
renal_carcinoma	cg13173536	2	TRAPPC12	3403300	rs62120497	2	3403318	A	G	0.246421	-0.100651	0.0433631	0.02028	-0.347133	0.036311	1.17749e-21	0.28995	0.128547	0.0240959	0.240054	20	0.0379979	0.541902	1.33636	1.03873	1.71927	1.336(1.039,1.719)	0.910824	2382	4.13824e-15	0.722766	6.31547e-16	0.110136	0.167097	0.602731	0.277234	1.51719
renal_carcinoma	cg02697402	16	JPH3	87616984	rs8059726	16	87611967	G	T	0.114519	-0.122152	0.0504594	0.0154863	-0.285839	0.0480106	2.62213e-09	0.427346	0.190566	0.0249283	0.548459	7	0.0538366	0.800855	1.53318	1.05531	2.22745	1.533(1.055,2.227)	0.910824	2378	0.743357	0.127431	0.102916	0.0176337	0.00866269	0.329425	0.0262964	0.491257
renal_carcinoma	cg17159058	8	CLN8	1704075	rs2293977	8	1711121	C	G	0.183027	-0.109756	0.0485006	0.0236366	0.664727	0.0424851	3.53184e-55	-0.165114	0.0737224	0.0251117	0.143621	20	-0.30961	-0.0206181	0.847797	0.733733	0.979593	0.848(0.734,0.98)	0.910824	3202	7.75628e-46	0.719225	1.24058e-46	0.114871	0.165904	0.59088	0.280775	1.44427
renal_carcinoma	cg07636176	2	APOB	21267175	rs11693545	2	21292377	A	C	0.317996	0.0841808	0.0373762	0.024306	0.601249	0.0327622	3.1869e-75	0.14001	0.0626306	0.0253855	0.200731	20	0.017254	0.262766	1.15029	1.0174	1.30052	1.15(1.017,1.301)	0.910824	1845	5.11389e-67	0.704057	1.35866e-67	0.186946	0.108997	0.368304	0.295943	0.58304
renal_carcinoma	cg21234082	9	DAB2IP	124363848	rs60631092	9	124362522	T	C	0.285276	0.0845787	0.037807	0.0252787	-1.27922	0.0243892	0	-0.0661174	0.0295816	0.0254118	0.350906	20	-0.124097	-0.00813746	0.936021	0.883294	0.991896	0.936(0.883,0.992)	0.910824	1686	0	0.712127	0	0.140338	0.147535	0.512501	0.287873	1.05128
renal_carcinoma	cg04297152	1	SOAT1	179262983	rs72713497	1	179255478	T	A	0.240286	0.097572	0.0432616	0.0241087	-0.542769	0.0390038	5.07785e-44	-0.179767	0.0807455	0.0259913	0.283162	20	-0.338028	-0.0215058	0.835465	0.713175	0.978724	0.835(0.713,0.979)	0.910824	2787	7.14297e-36	0.597206	2.85147e-36	0.23824	0.164554	0.408532	0.402794	0.690709
renal_carcinoma	cg17111025	2	BCL2L11	111936357	rs879623	2	111946824	G	A	0.507157	0.0823104	0.034694	0.0176698	0.210461	0.0326653	1.17174e-10	0.391096	0.175668	0.0259923	0.0940317	9	0.0467867	0.735405	1.4786	1.0479	2.08633	1.479(1.048,2.086)	0.910824	1102	3.81424e-06	0.624359	1.06746e-06	0.174534	0.201103	0.535365	0.375637	1.15223
renal_carcinoma	cg23755969	6	SSR1	7269198	rs17672692	6	7214499	T	C	0.180982	0.102934	0.0432233	0.0172443	0.259774	0.041557	4.07771e-10	0.396246	0.178054	0.0260525	0.806342	20	0.0472602	0.745232	1.48623	1.04839	2.10693	1.486(1.048,2.107)	0.910824	2546	4.95663e-05	0.726588	7.67144e-06	0.112294	0.16106	0.5892	0.273354	1.43427
renal_carcinoma	cg25369168	1	TOR1AIP2	179784495	rs2777912	1	179787605	G	A	0.303681	-0.0854241	0.0364584	0.0191265	0.232802	0.0337576	5.33799e-12	-0.366939	0.165399	0.0265203	0.216055	14	-0.691121	-0.042757	0.692852	0.501014	0.958144	0.693(0.501,0.958)	0.910824	2806	1.53307e-06	0.551842	6.14065e-07	0.22081	0.227345	0.507291	0.448156	1.0296
	cg20108357	11	BDNF	27718978	rs1488831	11	27637014	T	G	0.0603272	-0.174317	0.0723723	0.0160129	0.392347	0.0697413	1.84702e-08	-0.444294	0.200655	0.0268139			-0.837578	-0.0510102	0.641277	0.432757	0.950269	0.641(0.433,0.95)	0.910824
renal_carcinoma	cg01406280	11	CCND1	69454447	rs2930975	11	69451837	C	G	0.49182	0.0837134	0.036022	0.020128	0.232162	0.0322946	6.53228e-13	0.360582	0.163065	0.0270165	0.258815	17	0.0409746	0.680189	1.43416	1.04183	1.97425	1.434(1.042,1.974)	0.910824	2062	1.47626e-10	0.00154099	9.56205e-08	0.998136	0.000323128	0.000323627	0.998459	0.000323731
renal_carcinoma	cg15114474	11	CCND1	69451412	rs602652	11	69462642	A	G	0.51227	0.081334	0.0344348	0.0181779	-0.200073	0.0322765	5.69274e-10	-0.406522	0.184182	0.0273023	0.260648	7	-0.767519	-0.0455253	0.665962	0.464163	0.955495	0.666(0.464,0.955)	0.910824	2062	1.6261e-07	0.00154065	0.000105326	0.997916	0.000437621	0.000438343	0.998354	0.000438535
renal_carcinoma	cg03663874	16	PDIA2	332515	rs28680674	16	412974	A	G	0.220859	-0.0969363	0.0430472	0.024331	-0.382509	0.037534	2.17544e-24	0.253422	0.115254	0.0278906	0.0390949	20	0.0275242	0.47932	1.28843	1.02791	1.61498	1.288(1.028,1.615)	0.910824	1238	0.838731	0.118706	0.0341048	0.00482323	0.00363555	0.429796	0.00845878	0.753759
renal_carcinoma	cg01089589	2	PDIA6	10920095	rs6714903	2	10919957	G	T	0.112474	0.117792	0.0532825	0.0270566	-0.876034	0.0553712	2.22545e-56	-0.13446	0.0614134	0.0285656	0.66419	20	-0.25483	-0.0140897	0.874188	0.775048	0.986009	0.874(0.775,0.986)	0.910824	2921	8.1073e-45	0.715927	1.18195e-45	0.104194	0.179879	0.633215	0.284073	1.7264
renal_carcinoma	cg25518571	5	TERT	1286042	rs7705526	5	1285974	A	C	0.339468	0.106843	0.046484	0.0215345	-0.247491	0.0345505	7.88283e-13	-0.431703	0.197253	0.028628	0.152548	4	-0.818319	-0.0450871	0.649402	0.441173	0.955914	0.649(0.441,0.956)	0.910824	1068	7.77876e-07	0.694398	1.26711e-07	0.112921	0.192681	0.630497	0.305602	1.70634
renal_carcinoma	cg09177106	11	CCND1	69451645	rs1385874	11	69451580	G	A	0.494888	0.0816475	0.0359982	0.0233232	-0.263383	0.032152	2.5732e-16	-0.309995	0.141818	0.0288257	0.279577	15	-0.587958	-0.0320317	0.733451	0.55546	0.968476	0.733(0.555,0.968)	0.910824	2062	1.91439e-13	0.00154099	1.23999e-10	0.998131	0.000328313	0.00032882	0.998459	0.000328928
renal_carcinoma	cg11191049	14	ENTPD5	74485465	rs11848920	14	74476866	G	A	0.0817996	0.158926	0.0674829	0.0185203	0.393429	0.0675993	5.88416e-09	0.40395	0.185035	0.029029	0.102786	5	0.0412814	0.766619	1.49773	1.04215	2.15248	1.498(1.042,2.152)	0.910824	1779	0.00918705	0.665665	0.00142973	0.103374	0.220345	0.680668	0.323718	2.13154
renal_carcinoma	cg02275294	1	SOAT1	179262462	rs2050450	1	179258190	A	G	0.269939	-0.0885212	0.0385206	0.0215605	-0.241684	0.0363651	3.01081e-11	0.366268	0.168643	0.0298666	0.0588807	7	0.0357277	0.696808	1.44234	1.03637	2.00734	1.442(1.036,2.007)	0.910824	2786	0.000106356	0.281328	4.24552e-05	0.111694	0.606829	0.844551	0.718523	5.43298
renal_carcinoma	cg07611925	21	KCNE2	35736383	rs41260744	21	35736384	A	G	0.0807771	0.149486	0.0676954	0.0272295	-0.712605	0.0603459	3.5204e-32	-0.209774	0.0966437	0.0299624	0.620426	10	-0.399196	-0.0203523	0.810767	0.670859	0.979853	0.811(0.671,0.98)	0.910824	1517	0.843514	0.0653802	0.0805554	0.00623948	0.00431083	0.408597	0.0105503	0.690895
renal_carcinoma	cg20408276	2	CYP1B1	38300586	rs10178134	2	38308068	A	G	0.291411	-0.0835472	0.0378608	0.0273357	0.42952	0.0365867	7.96776e-32	-0.194513	0.0896905	0.0301046	0.681732	20	-0.370306	-0.0187196	0.823235	0.690523	0.981455	0.823(0.691,0.981)	0.910824	2543	4.2079e-25	0.644445	1.53927e-25	0.235621	0.119934	0.337314	0.355555	0.50901
	cg16377108	12	HSPB8	119557318	rs73213728	12	119539814	G	A	0.0449898	0.150075	0.0650681	0.0210864	0.400737	0.0636519	3.05898e-10	0.374498	0.172924	0.0303356			0.035567	0.713429	1.45426	1.03621	2.04098	1.454(1.036,2.041)	0.910824
renal_carcinoma	cg18410316	6	HLA-C	31207788	rs35303934	6	31234222	A	G	0.127812	0.138728	0.0609427	0.0228238	-0.353456	0.0506266	2.91771e-12	-0.39249	0.181353	0.0304462	0.701943	8	-0.747942	-0.0370381	0.675373	0.47334	0.963639	0.675(0.473,0.964)	0.910824	622	0.753158	0.0314243	0.198214	0.0082612	0.00894307	0.519817	0.0172043	1.08254
renal_carcinoma	cg27474382	6	TAP2	32807551	rs3763364	6	32807520	T	A	0.42638	-0.0751903	0.034615	0.0298416	-0.649501	0.0301101	3.37202e-103	0.115766	0.0535643	0.0306756	0.711214	20	0.01078	0.220752	1.12273	1.01084	1.24701	1.123(1.011,1.247)	0.910824	8082	5.0099e-94	0.442077	5.51055e-94	0.486183	0.0717396	0.128583	0.557923	0.147557
renal_carcinoma	cg01667837	7	GPR37	124405605	rs4731224	7	124484286	A	G	0.445808	0.0772284	0.0348217	0.0265668	0.310585	0.032455	1.07197e-21	0.248655	0.115088	0.0307292	0.550864	4	0.0230825	0.474227	1.2823	1.02335	1.60677	1.282(1.023,1.607)	0.910824	2129	3.88967e-17	0.670118	1.18822e-17	0.204583	0.125298	0.379828	0.329882	0.612455
renal_carcinoma	cg06570125	5	MAPK9	179723634	rs3805705	5	179738237	C	T	0.245399	0.0883177	0.0403413	0.028578	-0.50308	0.0381048	8.48177e-40	-0.175554	0.0812837	0.0307906	0.521126	20	-0.33487	-0.0162379	0.838992	0.715431	0.983893	0.839(0.715,0.984)	0.910824	1056	0.91157	0.0542374	0.0306733	0.00182333	0.00169633	0.481959	0.00351967	0.930349
renal_carcinoma	cg04412200	7	PDIA4	148680425	rs822544	7	148676145	C	T	0.274029	-0.0876165	0.0390509	0.024855	-0.27221	0.0343677	2.36532e-15	0.321871	0.149103	0.0308726	0.288968	17	0.0296291	0.614113	1.37971	1.03007	1.84802	1.38(1.03,1.848)	0.910824	975	0.90496	0.0553887	0.0345028	0.00210873	0.00303944	0.590392	0.00514817	1.44136
renal_carcinoma	cg19479654	19	GDF15	18496921	rs1059022	19	18499151	T	C	0.169734	-0.098	0.0448425	0.0288575	0.531462	0.0411559	3.78267e-38	-0.184397	0.0855755	0.0311785	0.0381755	17	-0.352125	-0.016669	0.831606	0.703192	0.983469	0.832(0.703,0.983)	0.910824	1649	2.0025e-30	0.795812	1.11207e-31	0.0440346	0.160153	0.784343	0.204188	3.63699
renal_carcinoma	cg06096245	17	GOSR2	45018418	rs17676978	17	45010824	A	G	0.109407	-0.120602	0.0558934	0.0309502	-1.68177	0.0409043	0	0.0717113	0.0332806	0.0311816	0.184849	20	0.00648132	0.136941	1.07435	1.0065	1.14676	1.074(1.007,1.147)	0.910824	1422	1.59903e-75	0.721084	1.38737e-76	0.0623471	0.216569	0.776467	0.278916	3.47361
renal_carcinoma	cg02162897	2	CYP1B1	38300537	rs10178134	2	38308068	A	G	0.291411	-0.0835472	0.0378608	0.0273357	0.353389	0.0370914	1.61085e-21	-0.236417	0.109973	0.0315724	0.780978	20	-0.451964	-0.0208699	0.789451	0.636377	0.979346	0.789(0.636,0.979)	0.910824	2543	2.87364e-15	0.639929	1.05119e-15	0.233963	0.126108	0.35023	0.360071	0.539007
renal_carcinoma	cg02780743	19	GDF15	18496932	rs1059022	19	18499151	T	C	0.169734	-0.098	0.0448425	0.0288575	0.463787	0.0410398	1.29859e-29	-0.211304	0.098479	0.031899	0.0265541	16	-0.404323	-0.0182852	0.809528	0.667429	0.981881	0.81(0.667,0.982)	0.910824	1649	1.34022e-22	0.797538	7.44278e-24	0.0441322	0.15833	0.782022	0.202462	3.58763
renal_carcinoma	cg05192293	10	SAR1A	71934086	rs4293019	10	71897517	T	G	0.41002	-0.0826064	0.0376088	0.0280586	-0.323905	0.0327384	4.43135e-23	0.255033	0.118937	0.032012	0.452155	20	0.0219165	0.48815	1.2905	1.02216	1.6293	1.291(1.022,1.629)	0.910824	2699	5.95109e-17	0.62883	9.45337e-18	0.0996188	0.271551	0.731608	0.37117	2.7259
renal_carcinoma	cg08498179	16	PDIA2	334749	rs12599449	16	397269	T	A	0.152352	-0.107742	0.0482452	0.0255339	-0.322549	0.0428293	5.0338e-14	0.334034	0.156013	0.0322681	0.786049	20	0.0282485	0.639819	1.39659	1.02865	1.89614	1.397(1.029,1.896)	0.910824	1242	0.91504	0.0442249	0.037311	0.00180166	0.00162249	0.473838	0.00342415	0.900555
renal_carcinoma	cg08006727	9	RNF183	116061614	rs10124895	9	116028559	A	C	0.253579	-0.0854308	0.0391266	0.0290028	-0.35273	0.0344029	1.14811e-24	0.242199	0.113412	0.0327153	0.056492	20	0.0199115	0.464487	1.27405	1.02011	1.5912	1.274(1.02,1.591)	0.910824	2251	1.48705e-18	0.794378	2.53871e-19	0.135547	0.0700746	0.340794	0.205622	0.516976
renal_carcinoma	cg00257789	2	TRAPPC12	3451506	rs6747650	2	3451507	G	A	0.374233	0.0763583	0.0357562	0.0327182	1.33093	0.0148877	0	0.0573722	0.0268733	0.0327679	0.25188	20	0.00470053	0.110044	1.05905	1.00471	1.11633	1.059(1.005,1.116)	0.910824	2382	0	0.76172	0	0.116126	0.122153	0.512648	0.23828	1.0519
renal_carcinoma	cg00071265	20	PSMA7	60717158	rs3746651	20	60718420	C	T	0.193252	-0.0941496	0.0437753	0.0314962	0.705388	0.0405106	6.64236e-68	-0.133472	0.0625301	0.0327998	0.664637	20	-0.256031	-0.010913	0.875052	0.774118	0.989146	0.875(0.774,0.989)	0.910824	2696	3.77239e-58	0.736502	5.98284e-59	0.116659	0.146839	0.557269	0.263498	1.25871
renal_carcinoma	cg20727362	22	CYB5R3	43045952	rs2267456	22	43029809	A	G	0.112474	0.112808	0.0528193	0.0327005	-1.7308	0.039952	0	-0.0651769	0.0305543	0.0329124	0.463211	20	-0.125063	-0.00529047	0.936902	0.882441	0.994723	0.937(0.882,0.995)	0.910824	1681	0.00661885	0.855209	0.000506488	0.0653701	0.0722954	0.525153	0.137665	1.10594
renal_carcinoma	cg11854928	12	NOS1	117768754	rs571895	12	117771132	A	T	0.204499	-0.103657	0.0456518	0.0231706	0.271399	0.0441539	7.91296e-10	-0.381937	0.179319	0.0331774	0.509831	8	-0.733402	-0.0304718	0.682538	0.480272	0.969988	0.683(0.48,0.97)	0.910824	1298	0.860497	0.0739442	0.0570557	0.00489931	0.00360336	0.423792	0.00850267	0.735484
renal_carcinoma	cg08162780	19	GDF15	18497064	rs1059022	19	18499151	T	C	0.169734	-0.098	0.0448425	0.0288575	0.381566	0.041274	2.35887e-20	-0.256836	0.120761	0.033436	0.0132561	12	-0.493528	-0.0201444	0.773495	0.610469	0.980057	0.773(0.61,0.98)	0.910824	1649	6.18855e-14	0.809386	3.43675e-15	0.0448027	0.145812	0.764956	0.190614	3.25453
renal_carcinoma	cg24455365	1	PINK1	20961229	rs3121395	1	20970344	T	C	0.099182	-0.117418	0.0547018	0.0318319	0.657373	0.0497168	6.51917e-40	-0.178617	0.0843021	0.0341093	0.0256109	20	-0.343849	-0.0133849	0.836426	0.709036	0.986704	0.836(0.709,0.987)	0.910824	1797	8.8863e-32	0.688846	1.81953e-32	0.140875	0.170279	0.547249	0.311154	1.20872
renal_carcinoma	cg21182461	9	DAB2IP	124362291	rs4836859	9	124363849	A	G	0.285276	0.0843195	0.0378044	0.0257199	-0.244306	0.036786	3.10988e-11	-0.345139	0.163235	0.0344844	0.396133	6	-0.66508	-0.0251984	0.708122	0.514233	0.975116	0.708(0.514,0.975)	0.910824	1686	2.78131e-06	0.724056	5.48685e-07	0.142706	0.133235	0.482839	0.27594	0.933634
renal_carcinoma	cg09139047	6	HLA-DRB1	32552042	rs9271525	6	32589842	G	A	0.140082	-0.117383	0.0555373	0.0345512	-1.63034	0.0251566	0	0.0719988	0.034083	0.0346474	0.162177	20	0.00519612	0.138801	1.07465	1.00521	1.1489	1.075(1.005,1.149)	0.910824	8082	0	0.397287	0	0.436823	0.165891	0.27524	0.602713	0.379767
renal_carcinoma	cg17183232	1	PINK1	20958590	rs1781455	1	20947222	T	C	0.0725971	0.133862	0.0618389	0.0304109	-0.566909	0.0588415	5.71679e-22	-0.236127	0.1118	0.0346828	0.42086	11	-0.455255	-0.016999	0.78968	0.634286	0.983145	0.79(0.634,0.983)	0.910824	1797	1.06504e-14	0.594609	2.18073e-15	0.121466	0.283926	0.700374	0.405391	2.33749
renal_carcinoma	cg15982117	6	HLA-DRB1	32552106	rs9271525	6	32589842	G	A	0.140082	-0.117383	0.0555373	0.0345512	-1.52511	0.0285519	0	0.0769666	0.0364438	0.0346928	0.306779	20	0.00553675	0.148396	1.08001	1.00555	1.15997	1.08(1.006,1.16)	0.910824	8082	0	0.422642	0	0.464765	0.112592	0.195013	0.577358	0.242256
renal_carcinoma	cg12867728	6	HLA-DRB1	32549283	rs9271525	6	32589842	G	A	0.140082	-0.117383	0.0555373	0.0345512	0.985505	0.0403249	6.57256e-132	-0.119109	0.0565645	0.0352288	0.143707	20	-0.229975	-0.00824258	0.887711	0.794553	0.991791	0.888(0.795,0.992)	0.910824	8082	2.53831e-119	0.400202	2.79197e-119	0.440036	0.159761	0.266359	0.599798	0.363064
renal_carcinoma	cg18511546	6	HLA-C	31238388	rs2523578	6	31328542	G	A	0.200409	-0.0934236	0.0442907	0.0349162	0.884449	0.0307999	2.41081e-181	-0.105629	0.0502121	0.035408	0.062247	20	-0.204045	-0.00721328	0.899758	0.815426	0.992813	0.9(0.815,0.993)	0.910824	797	5.35644e-68	0.775745	1.44647e-68	0.20947	0.0147848	0.0659288	0.224255	0.0705822
renal_carcinoma	cg09579932	17	TRPV1	3499165	rs161369	17	3527071	T	C	0.464213	-0.0807078	0.0363812	0.0265282	-0.215853	0.0326728	3.9349e-11	0.373902	0.177795	0.0354661	0.771295	10	0.0254238	0.72238	1.45339	1.02575	2.05933	1.453(1.026,2.059)	0.910824	2073	0.719663	0.19508	0.0620184	0.016805	0.00643377	0.276855	0.0232387	0.382849
renal_carcinoma	cg09406615	3	BCHE	165555103	rs79697219	3	165556726	C	A	0.0777096	-0.149635	0.0691929	0.0305737	-0.569042	0.0639467	5.65111e-19	0.262959	0.125135	0.0356047	0.503427	8	0.0176944	0.508224	1.30077	1.01785	1.66234	1.301(1.018,1.662)	0.910824	2708	4.99691e-12	0.743881	7.58053e-13	0.112707	0.143413	0.559945	0.256119	1.27244
renal_carcinoma	cg17454857	20	ERGIC3	34127524	rs7263068	20	34121244	T	C	0.146217	-0.109123	0.0511105	0.0327584	-0.56986	0.0490234	3.1036e-31	0.19149	0.0911899	0.0357372	0.854176	20	0.0127578	0.370222	1.21105	1.01284	1.44806	1.211(1.013,1.448)	0.910824	1488	9.40479e-24	0.752938	7.79429e-25	0.0622155	0.184846	0.748178	0.247062	2.97107
renal_carcinoma	cg18097763	6	HLA-DRB1	32548402	rs9271525	6	32589842	G	A	0.140082	-0.117383	0.0555373	0.0345512	-0.713877	0.0413059	6.34992e-67	0.16443	0.0783764	0.0359097	0.192504	20	0.0108123	0.318048	1.17872	1.01087	1.37444	1.179(1.011,1.374)	0.910824	8082	1.06644e-57	0.397577	1.17301e-57	0.437142	0.165281	0.27436	0.602423	0.378094
renal_carcinoma	cg18241877	12	PXN	120706015	rs1151830	12	120682408	G	A	0.116564	-0.113553	0.0530941	0.0324596	0.518336	0.0494707	1.09455e-25	-0.219071	0.104544	0.036127	0.398667	16	-0.423977	-0.0141648	0.803265	0.654439	0.985935	0.803(0.654,0.986)	0.910824	2100	0.581527	0.328093	0.0504856	0.0284722	0.0114217	0.286302	0.0398939	0.401154
renal_carcinoma	cg04242898	22	CYB5R3	43043131	rs2285141	22	43032870	T	G	0.114519	0.11203	0.0526519	0.0333578	0.623412	0.0528204	3.78949e-32	0.179705	0.0858191	0.0362605	0.839322	20	0.0114996	0.34791	1.19686	1.01157	1.41611	1.197(1.012,1.416)	0.910824	1674	0.85077	0.075179	0.0649321	0.00573439	0.00338427	0.371137	0.00911865	0.590171
renal_carcinoma	cg04400110	19	INSR	7198500	rs2396188	19	7199534	G	A	0.42638	-0.0779997	0.0353641	0.0274109	-0.219218	0.0329495	2.86864e-11	0.355809	0.169953	0.0362982	0.932904	5	0.0227011	0.688917	1.42733	1.02296	1.99156	1.427(1.023,1.992)	0.910824	2301	3.75893e-06	0.65207	1.26749e-06	0.219747	0.128178	0.368408	0.347925	0.583301
renal_carcinoma	cg02081976	1	SOAT1	179262564	rs12138973	1	179254984	G	A	0.269939	-0.0847845	0.0388658	0.0291489	-0.246644	0.0350063	1.84536e-12	0.343753	0.164959	0.037172	0.118495	11	0.0204334	0.667073	1.41023	1.02064	1.94852	1.41(1.021,1.949)	0.910824	2786	4.15959e-07	0.23664	1.66042e-07	0.0937921	0.669568	0.877132	0.76336	7.13885
renal_carcinoma	cg17152484	7	GPR37	124405757	rs6945104	7	124557915	A	G	0.445808	0.0778474	0.0349107	0.0257541	0.192151	0.0330132	5.86938e-09	0.405136	0.194561	0.037314	0.685009	7	0.0237964	0.786476	1.49951	1.02408	2.19564	1.5(1.024,2.196)	0.910824	2129	4.93202e-05	0.671561	1.50664e-05	0.205026	0.123348	0.375632	0.328374	0.60162
renal_carcinoma	cg18023771	7	OSBPL3	24874132	rs17292110	7	24877165	T	A	0.148262	-0.114041	0.0510726	0.0255543	0.257576	0.0450443	1.07607e-08	-0.442747	0.212863	0.0375287	0.377474	6	-0.859958	-0.0255355	0.64227	0.42318	0.974788	0.642(0.423,0.975)	0.910824	1634	0.795334	0.100725	0.0865556	0.0109554	0.00642935	0.369826	0.0173848	0.586864
renal_carcinoma	cg00306510	4	TLR3	187003000	rs3775292	4	187003025	C	G	0.199387	-0.109473	0.0511277	0.0322611	-0.330673	0.0387893	1.53003e-17	0.33106	0.159419	0.037833	0.317966	20	0.0185988	0.643521	1.39244	1.01877	1.90317	1.392(1.019,1.903)	0.910824	1930	0.803409	0.0859677	0.0957698	0.0102431	0.00461008	0.310377	0.0148532	0.450067
renal_carcinoma	cg27531490	6	TNF	31542459	rs1800630	6	31542476	A	C	0.143149	0.0996662	0.0477483	0.0368591	0.769922	0.0460512	9.55638e-63	0.12945	0.0624986	0.0383362	0.160951	20	0.00695274	0.251947	1.1382	1.00698	1.28653	1.138(1.007,1.287)	0.910824	2368	0.000174785	0.713333	6.49206e-05	0.264933	0.0214939	0.0750414	0.286427	0.0811295
renal_carcinoma	cg08764465	8	TUSC3	15308417	rs7006693	8	15308172	G	C	0.240286	-0.0977592	0.0437641	0.0254976	-0.204715	0.0370148	3.19101e-08	0.477538	0.230559	0.0383383	0.341067	4	0.0256424	0.929434	1.6121	1.02597	2.53307	1.612(1.026,2.533)	0.910824	2041	0.569105	0.135138	0.228455	0.0542353	0.0130663	0.194146	0.0673016	0.24092
renal_carcinoma	cg05357619	17	NFE2L1	46134798	rs117508783	17	46024254	T	A	0.0501022	-0.22439	0.108398	0.0384463	-2.18567	0.0664139	1.59024e-237	0.102664	0.0496927	0.0388302	0.32194	20	0.00526631	0.200062	1.10812	1.00528	1.22148	1.108(1.005,1.221)	0.910824	1795	4.15388e-193	0.740864	4.17017e-194	0.0741921	0.184943	0.713694	0.259136	2.49277
renal_carcinoma	cg22765178	2	NCK2	106378429	rs4851844	2	106378488	A	C	0.378323	0.0787598	0.0353525	0.0258908	-0.181263	0.0329689	3.84116e-08	-0.434506	0.210438	0.0389446	0.83195	3	-0.846964	-0.0220475	0.647584	0.428714	0.978194	0.648(0.429,0.978)	0.910824	2505	0.00678123	0.672704	0.0017787	0.176307	0.142429	0.446857	0.318736	0.80785
renal_carcinoma	cg09538452	19	GDF15	18496756	rs8101249	19	18501830	C	A	0.169734	-0.0972262	0.0444364	0.0286707	0.258387	0.041434	4.48583e-10	-0.376281	0.182254	0.0389613	0.0641058	6	-0.733499	-0.0190632	0.686409	0.480226	0.981117	0.686(0.48,0.981)	0.910824	1649	0.000109111	0.812671	6.05941e-06	0.0449887	0.142226	0.759694	0.187214	3.16136
renal_carcinoma	cg17159161	6	HLA-B	31323760	rs116234817	6	31321364	A	G	0.0593047	0.163592	0.0795689	0.0397842	1.73216	0.0668604	5.53788e-148	0.0944442	0.0460807	0.0404094	0.372356	20	0.00412603	0.184762	1.09905	1.00413	1.20293	1.099(1.004,1.203)	0.910824	1213	7.96012e-15	0.763027	2.23962e-15	0.214659	0.0223143	0.0941639	0.236973	0.103953
renal_carcinoma	cg11184109	3	RFT1	53164962	rs6784207	3	53167474	A	C	0.291411	-0.0800893	0.0380151	0.0351371	0.311799	0.0359425	4.13758e-18	-0.256862	0.125466	0.0406319	0.514738	20	-0.502775	-0.0109486	0.773475	0.60485	0.989111	0.773(0.605,0.989)	0.910824	1356	6.3214e-13	0.746036	1.18081e-13	0.139242	0.114722	0.451727	0.253964	0.823908
renal_carcinoma	cg01331992	9	RPS6	19379118	rs41270113	9	19380239	T	A	0.0920245	0.141884	0.0662029	0.0320999	-0.449831	0.0652752	5.52828e-12	-0.315415	0.154126	0.0407089	0.22062	10	-0.617502	-0.013328	0.729486	0.53929	0.98676	0.729(0.539,0.987)	0.910824	2850	1.05105e-05	0.752191	1.88271e-06	0.134624	0.113173	0.456717	0.247797	0.840661
renal_carcinoma	cg01517384	6	HLA-B	31323856	rs116234817	6	31321364	A	G	0.0593047	0.163592	0.0795689	0.0397842	1.46877	0.0697036	1.4475e-98	0.111381	0.0544311	0.0407302	0.430705	20	0.00469604	0.218066	1.11782	1.00471	1.24367	1.118(1.005,1.244)	0.910824	1213	2.49628e-30	0.75838	7.02341e-31	0.213346	0.0282746	0.117021	0.24162	0.13253
renal_carcinoma	cg00166653	2	SLC8A1	40429179	rs10176641	2	40480379	A	G	0.0889571	-0.124268	0.0597126	0.0374242	-0.562543	0.0527172	1.39189e-26	0.220905	0.108147	0.0410898	0.626722	20	0.00893688	0.432873	1.2472	1.00898	1.54168	1.247(1.009,1.542)	0.910824	1937	9.38671e-19	0.780245	1.2594e-19	0.104569	0.115187	0.524158	0.219755	1.10154
renal_carcinoma	cg02099572	13	COL4A1	110885345	rs61963290	13	110884861	A	T	0.106339	-0.126164	0.0593784	0.0336077	-0.395013	0.0541134	2.88344e-13	0.319392	0.156558	0.0413421	0.168314	4	0.0125383	0.626246	1.37629	1.01262	1.87057	1.376(1.013,1.871)	0.910824	2679	3.36554e-07	0.673932	8.15297e-08	0.163096	0.162971	0.499808	0.326068	0.999233
renal_carcinoma	cg21005607	7	NPY	24376838	rs2722403	7	24382726	G	T	0.177914	0.0929599	0.0449466	0.0386182	-0.497911	0.0428139	2.91246e-31	-0.1867	0.0916867	0.0417221	0.29368	20	-0.366406	-0.00699407	0.829693	0.693221	0.99303	0.83(0.693,0.993)	0.910824	1034	0.785919	0.177823	0.0259963	0.00587754	0.00438481	0.427272	0.0102624	0.746028
renal_carcinoma	cg01992590	17	COL1A1	48277042	rs2586494	17	48273155	A	C	0.133947	0.100425	0.0486149	0.038855	-0.569133	0.0479245	1.58472e-32	-0.176452	0.0867018	0.0418348	0.0736712	11	-0.346388	-0.00651647	0.838239	0.707238	0.993505	0.838(0.707,0.994)	0.910824	1197	0.110452	0.508981	0.0642769	0.29618	0.0201101	0.0635813	0.31629	0.0678983
renal_carcinoma	cg23987736	1	CDC42	22380393	rs12740705	1	22421113	T	C	0.168712	0.107109	0.0511746	0.036348	0.39856	0.0495474	8.69391e-16	0.26874	0.132674	0.042809	0.345767	13	0.00869896	0.528781	1.30831	1.00874	1.69686	1.308(1.009,1.697)	0.910824	2140	2.39652e-10	0.757183	2.90436e-11	0.0916124	0.151204	0.62271	0.242817	1.65048
renal_carcinoma	cg02145102	6	HLA-C	31276418	rs9266234	6	31325494	T	C	0.270961	-0.0903526	0.0422343	0.03241	-0.206607	0.033515	7.0652e-10	0.437316	0.216378	0.0432719	0.26448	20	0.0132151	0.861417	1.54855	1.0133	2.36651	1.549(1.013,2.367)	0.910824	912	0.481522	0.2903	0.131498	0.07926	0.0174197	0.180179	0.0966797	0.219779
renal_carcinoma	cg18861827	3	GOLGB1	121469168	rs73179983	3	121473986	A	C	0.253579	-0.08963	0.0414007	0.0303923	0.211592	0.0378539	2.27454e-08	-0.423598	0.209826	0.043507	0.69904	3	-0.834857	-0.012339	0.654687	0.433937	0.987737	0.655(0.434,0.988)	0.910824	2043	0.0815433	0.656384	0.0160231	0.128861	0.117188	0.476278	0.246049	0.909411
renal_carcinoma	cg09852920	17	COL1A1	48277216	rs2586494	17	48273155	A	C	0.133947	0.100425	0.0486149	0.038855	0.459172	0.0484801	2.7624e-21	0.218708	0.108364	0.0435627	0.0274701	10	0.00631456	0.431101	1.24447	1.00633	1.53895	1.244(1.006,1.539)	0.910824	1197	0.38373	0.232833	0.223311	0.135472	0.0246536	0.153964	0.160126	0.181983
	cg14159970	14	PRKD1	30440412	rs178916	14	30440408	G	A	0.0807771	0.170003	0.0807195	0.0351961	-0.466177	0.0662549	1.9767e-12	-0.364675	0.180743	0.043628			-0.718931	-0.0104187	0.694422	0.487273	0.989635	0.694(0.487,0.99)	0.910824
renal_carcinoma	cg26537098	17	TRPV1	3506137	rs17634022	17	3509158	C	G	0.242331	-0.0838234	0.0411922	0.0418576	-0.574574	0.0373813	2.57744e-53	0.145888	0.0723173	0.043661	0.264815	20	0.00414609	0.28763	1.15707	1.00415	1.33326	1.157(1.004,1.333)	0.910824	2068	0.737075	0.178576	0.0634477	0.0153664	0.00553497	0.264814	0.0209013	0.3602
renal_carcinoma	cg15246511	2	APOB	21267212	rs1367113	2	21295832	A	G	0.329243	0.074183	0.0364727	0.0419587	0.495135	0.0335431	2.60736e-49	0.149824	0.0743582	0.0439159	0.21233	20	0.00408193	0.295566	1.16163	1.00409	1.34389	1.162(1.004,1.344)	0.910824	1845	4.08001e-42	0.707234	1.08398e-42	0.187794	0.104972	0.358552	0.292766	0.558973
renal_carcinoma	cg25043378	8	ANK1	41522857	rs563118	8	41521663	T	C	0.447853	0.070002	0.0344083	0.0419059	0.461316	0.0328038	6.42293e-45	0.151744	0.0753637	0.0440629	0.506636	20	0.00403115	0.299457	1.16386	1.00404	1.34913	1.164(1.004,1.349)	0.910824	1448	0.363272	0.0555021	0.486287	0.0742762	0.0206633	0.217647	0.0949394	0.278195
renal_carcinoma	cg07208333	5	PIK3R1	67584380	rs10940161	5	67567985	C	G	0.248466	0.0860188	0.0398208	0.0307615	-0.209133	0.0376459	2.7719e-08	-0.411311	0.204298	0.0440837	0.531531	5	-0.811735	-0.0108869	0.662781	0.444087	0.989172	0.663(0.444,0.989)	0.910824	1965	0.00268093	0.781426	0.000293105	0.0853024	0.130297	0.604348	0.2156	1.52748
renal_carcinoma	cg19853760	22	LGALS1	38071677	rs9622675	22	38053665	T	G	0.400818	0.073337	0.0358413	0.0407404	0.353779	0.0321529	3.69534e-28	0.207296	0.103047	0.0442543	0.997614	20	0.00532388	0.409268	1.23035	1.00534	1.50572	1.23(1.005,1.506)	0.910824	977	1.6007e-05	0.733125	5.34019e-06	0.24456	0.0222933	0.0835413	0.266854	0.0911566
renal_carcinoma	cg25123895	2	APOB	21267113	rs62122516	2	21295439	T	A	0.329243	0.0737979	0.0364637	0.0429831	0.588098	0.032837	9.9243e-72	0.125486	0.0623974	0.0443176	0.214781	20	0.0031871	0.247785	1.1337	1.00319	1.28118	1.134(1.003,1.281)	0.910824	1845	1.45433e-63	0.708794	3.86387e-64	0.18821	0.102995	0.353685	0.291206	0.547234
renal_carcinoma	cg15614872	7	ESYT2	158531752	rs2089227	7	158642108	G	A	0.112474	0.110559	0.0542622	0.0415999	-0.641727	0.0521892	9.49736e-35	-0.172284	0.0857096	0.0444215	0.519888	17	-0.340275	-0.00429318	0.84174	0.711575	0.995716	0.842(0.712,0.996)	0.910824	2709	8.87641e-16	0.870541	1.00586e-16	0.098617	0.0308418	0.238236	0.129459	0.312743
renal_carcinoma	cg09861922	2	APOB	21451686	rs35239705	2	21451687	A	G	0.218814	-0.0965758	0.0473631	0.0414448	-0.520409	0.0439314	2.25882e-32	0.185577	0.0923497	0.0444841	0.631647	20	0.00457159	0.366582	1.20391	1.00458	1.4428	1.204(1.005,1.443)	0.910824	1612	5.37276e-13	0.711791	1.39187e-13	0.184293	0.103916	0.360557	0.288209	0.563862
renal_carcinoma	cg14599440	18	MPPE1	11909634	rs34755275	18	11909259	A	G	0.259714	-0.0823669	0.0396501	0.0377697	0.2909	0.0387783	6.30392e-14	-0.283145	0.141431	0.0452845	0.257064	20	-0.56035	-0.00594024	0.753411	0.571009	0.994077	0.753(0.571,0.994)	0.910824	1541	0.84063	0.0873428	0.0616702	0.00640367	0.00395338	0.381709	0.0103571	0.617361
renal_carcinoma	cg02389323	16	PIEZO1	88786976	rs4401037	16	88786967	C	T	0.109407	-0.121089	0.0604999	0.0453418	-1.48605	0.0382378	0	0.0814837	0.0407659	0.0456278	0.982069	20	0.00158254	0.161385	1.0849	1.00158	1.17514	1.085(1.002,1.175)	0.910824	1582	0.154583	0.715297	0.0184238	0.0852255	0.0264706	0.236987	0.111696	0.310594
renal_carcinoma	cg21064451	22	LGALS1	38071534	rs62236669	22	38065337	C	T	0.399796	0.0727845	0.0358874	0.0425463	0.370122	0.032731	1.19792e-29	0.19665	0.0985081	0.0459031	0.910589	20	0.00357412	0.389726	1.21732	1.00358	1.47658	1.217(1.004,1.477)	0.910824	975	0.00126429	0.738102	0.000419937	0.245148	0.0150662	0.0578994	0.260214	0.0614577
renal_carcinoma	cg12533658	17	STARD3	37809838	rs1107794	17	37823600	C	T	0.0562372	0.173245	0.0837745	0.0386404	0.482762	0.0633835	2.60594e-14	0.358863	0.179814	0.0459622	0.0360824	5	0.00642756	0.711298	1.4317	1.00645	2.03663	1.432(1.006,2.037)	0.910824	1118	3.30239e-07	0.7847	1.61103e-08	0.0381035	0.177196	0.823021	0.2153	4.65039
renal_carcinoma	cg25738176	17	ATP2A3	3848506	rs62071735	17	3852055	G	A	0.259714	0.0798919	0.039758	0.0444888	-0.516454	0.037387	2.10622e-43	-0.154693	0.0777928	0.0467534	0.959213	20	-0.307167	-0.00221911	0.856678	0.735528	0.997783	0.857(0.736,0.998)	0.910824	1064	0.701335	0.0598501	0.211625	0.0180504	0.00914013	0.336152	0.0271905	0.506368
renal_carcinoma	cg27262398	11	SLN	107578793	rs535346	11	107587316	C	A	0.376278	-0.0741433	0.0351098	0.0347072	-0.193365	0.0331239	5.29466e-09	0.383437	0.193088	0.0470536	0.736066	3	0.00498452	0.761889	1.46732	1.005	2.14232	1.467(1.005,2.142)	0.910824	1155	0.7826	0.0526108	0.147935	0.00993814	0.00691555	0.410329	0.0168537	0.69586
renal_carcinoma	cg18940763	22	XBP1	29197846	rs2013784	22	28923933	C	T	0.116564	0.0999254	0.0480322	0.0374905	-0.333446	0.0510672	6.59658e-11	-0.299675	0.151183	0.0474564	0.152397	19	-0.595994	-0.00335632	0.741059	0.551015	0.996649	0.741(0.551,0.997)	0.910824	1719	0.000259653	0.776469	4.76033e-05	0.142273	0.0809507	0.362644	0.223223	0.568983
renal_carcinoma	cg20546782	17	TRPV1	3505636	rs62069928	17	3514598	T	C	0.244376	-0.0829863	0.0411144	0.0435468	-0.396402	0.0381686	2.88532e-25	0.209349	0.10566	0.0475516	0.360541	20	0.0022554	0.416443	1.23288	1.00226	1.51656	1.233(1.002,1.517)	0.910824	2068	0.837928	0.0797888	0.0721291	0.00686496	0.00328941	0.32394	0.0101544	0.479159
renal_carcinoma	cg25599198	17	ATP2A3	3848156	rs730900	17	3851451	T	C	0.256646	0.0790743	0.0397266	0.04654	0.712833	0.0354176	4.32162e-90	0.11093	0.0560025	0.0476138	0.981691	20	0.0011651	0.220695	1.11732	1.00117	1.24694	1.117(1.001,1.247)	0.910824	1063	0.727149	0.0458054	0.206406	0.0129945	0.00764559	0.370424	0.0206401	0.58837
renal_carcinoma	cg23325242	22	CYB5R3	43044788	rs28365957	22	43045695	A	G	0.114519	0.105241	0.0530887	0.0474391	1.69418	0.0409837	0	0.0621191	0.031372	0.0476941	0.535974	20	0.00062998	0.123608	1.06409	1.00063	1.13157	1.064(1.001,1.132)	0.910824	1678	0.13837	0.76424	0.0105753	0.0583805	0.0284344	0.327529	0.0868149	0.487052
renal_carcinoma	cg07748036	3	EDEM1	5230340	rs11716864	3	5167241	A	G	0.125767	-0.110716	0.0541828	0.0410147	0.379476	0.0478408	2.15535e-15	-0.29176	0.147445	0.0478411	0.185434	20	-0.580752	-0.0027678	0.746948	0.559477	0.997236	0.747(0.559,0.997)	0.910824	2688	5.72776e-09	0.692909	2.10177e-09	0.254207	0.0528841	0.17221	0.307091	0.208036
renal_carcinoma	cg24251862	22	CYB5R3	43045736	rs28365958	22	43045643	G	C	0.114519	0.107618	0.0538884	0.0458191	-0.694356	0.0521424	1.85545e-40	-0.15499	0.078477	0.0482715	0.471338	20	-0.308805	-0.00117508	0.856424	0.734324	0.998826	0.856(0.734,0.999)	0.910824	1680	0.626162	0.291904	0.0478904	0.0223137	0.0117298	0.344552	0.0340435	0.525674
renal_carcinoma	cg04059188	22	CYB5R3	43045723	rs28365958	22	43045643	G	C	0.114519	0.107618	0.0538884	0.0458191	-0.657744	0.0527735	1.18042e-35	-0.163617	0.0829742	0.0486207	0.320792	20	-0.326246	-0.000987568	0.849067	0.721627	0.999013	0.849(0.722,0.999)	0.910824	1680	0.760042	0.15967	0.0581298	0.012202	0.00995543	0.449304	0.0221574	0.815885
renal_carcinoma	cg04188764	6	MICA	31380491	rs2523578	6	31328542	G	A	0.200409	-0.0934236	0.0442907	0.0349162	-0.19012	0.0343276	3.05238e-08	0.491393	0.249285	0.0487003	0.659145	3	0.0027944	0.979992	1.63459	1.0028	2.66443	1.635(1.003,2.664)	0.910824	1736	0.567695	0.191623	0.169322	0.0571397	0.0142201	0.199274	0.0713598	0.248866
renal_carcinoma	cg13178487	1	CLCC1	109505686	rs13303114	1	109577783	A	G	0.261759	0.0934991	0.0454938	0.0398591	-0.249926	0.0358839	3.28749e-12	-0.374107	0.189789	0.0487035	0.80322	10	-0.746093	-0.00212056	0.687903	0.474215	0.997882	0.688(0.474,0.998)	0.910824	1580	5.74432e-07	0.790127	6.06774e-08	0.0833348	0.126538	0.602927	0.209873	1.51843
renal_carcinoma	cg08100522	3	SCN5A	38675834	rs9844378	3	38700871	A	G	0.334356	-0.0732797	0.0368946	0.0470122	-0.46915	0.0345583	5.58698e-42	0.156197	0.0794786	0.0493832	0.12714	20	0.000418944	0.311975	1.16906	1.00042	1.36612	1.169(1,1.366)	0.910824	1876	1.5874e-34	0.715715	4.29419e-35	0.193523	0.0907618	0.319264	0.284285	0.468997
renal_carcinoma	cg13809528	2	PDIA6	10951921	rs10192112	2	10958948	T	C	0.110429	0.109283	0.0535242	0.041177	0.421511	0.058164	4.2629e-13	0.259264	0.131925	0.0493869	0.549666	7	0.000691	0.517837	1.29598	1.00069	1.67839	1.296(1.001,1.678)	0.910824	2886	3.81675e-07	0.732601	5.52822e-08	0.105949	0.161449	0.603777	0.267398	1.52383
renal_carcinoma	cg27573570	1	SPCS2	28422839	rs556596	1	28409396	T	G	0.437628	0.0693916	0.0349054	0.0468129	0.422062	0.0324089	9.05043e-39	0.164411	0.0836601	0.0493883	0.262492	20	0.000437204	0.328385	1.1787	1.00044	1.38872	1.179(1,1.389)	0.910824	938	0.888632	0.0730562	0.0323227	0.00265397	0.00333547	0.556891	0.00598944	1.25678
	cg04463386	11	SERPINH1	75295186	rs1231128	11	75298797	G	A	0.311861	-0.0799659	0.0396534	0.0437354	-0.289787	0.0348818	9.7589e-17	0.275947	0.14081	0.0500299	0.633906	6	-4.06e-05	0.551935	1.31778	0.999959	1.73661	1.318(1,1.737)	0.910824
	cg20210373	17	TRPV1	3505714	rs62069928	17	3514598	T	C	0.244376	-0.0829863	0.0411144	0.0435468	-0.300403	0.0379187	2.3316e-15	0.27625	0.141236	0.0504719	0.04419	6	-0.00057256	0.553073	1.31818	0.999428	1.73859	1.318(0.999,1.739)	0.910824
	cg14311320	7	GPR37	124405732	rs1557969	7	124405738	G	A	0.493865	0.0679582	0.0345192	0.0489867	0.465114	0.0317447	1.31369e-48	0.146111	0.0748836	0.0510366	0.719304	4	-0.000660856	0.292883	1.15732	0.999339	1.34029	1.157(0.999,1.34)	0.910824
	cg11479568	8	ANK1	41522951	rs563118	8	41521663	T	C	0.447853	0.070002	0.0344083	0.0419059	0.226121	0.0338354	2.3415e-11	0.309578	0.159062	0.0516226	0.435611	16	-0.00218352	0.62134	1.36285	0.997819	1.86142	1.363(0.998,1.861)	0.910824
	cg26170930	17	GOSR2	45020358	rs10853086	17	45006109	A	G	0.367076	0.0732061	0.0367662	0.0464673	-0.307042	0.0333204	3.11778e-20	-0.238424	0.122507	0.0516297	0.241211	20	-0.478538	0.00168972	0.787869	0.619689	1.00169	0.788(0.62,1.002)	0.910824
	cg15611809	5	PIK3R1	67483833	rs6449955	5	67482828	A	T	0.302658	0.0771781	0.0377591	0.0409574	-0.213975	0.0342392	4.11987e-10	-0.360687	0.185664	0.0520531	0.627242	13	-0.724588	0.00321444	0.697197	0.484524	1.00322	0.697(0.485,1.003)	0.910824
	cg14509581	15	CLN6	68522181	rs7402649	15	68436575	C	A	0.43047	-0.0719758	0.034791	0.0385645	0.183228	0.0326005	1.90518e-08	-0.392821	0.202333	0.0522028	0.178072	9	-0.789394	0.00375168	0.67515	0.45412	1.00376	0.675(0.454,1.004)	0.910824
	cg04422903	11	CCDC88B	64108550	rs66493355	11	64108539	T	C	0.303681	0.0709177	0.0363737	0.0512119	-0.677406	0.0326036	6.9825e-96	-0.10469	0.0539314	0.0522374	0.814004	20	-0.210396	0.00101554	0.900604	0.810264	1.00102	0.901(0.81,1.001)	0.910824
	cg03634778	6	HLA-C	31276797	rs74657444	6	31234835	T	C	0.107362	-0.134256	0.0679499	0.0481771	-0.465448	0.04541	1.18474e-24	0.288444	0.148676	0.0523691	0.204697	20	-0.00296096	0.579849	1.33435	0.997043	1.78577	1.334(0.997,1.786)	0.910824
	cg23044053	10	ITGB1	33294676	rs16933862	10	33296362	G	A	0.0736196	0.131452	0.0640409	0.0401086	-0.378251	0.0638405	3.12412e-09	-0.347526	0.17918	0.0524363			-0.698719	0.0036668	0.706434	0.497222	1.00367	0.706(0.497,1.004)	0.910824
	cg09075484	6	DST	56727416	rs78770879	6	56714058	C	T	0.193252	0.0875451	0.0450705	0.0520884	0.893499	0.0386795	4.62092e-118	0.0979801	0.0506208	0.0529202	0.286351	20	-0.00123667	0.197197	1.10294	0.998764	1.21798	1.103(0.999,1.218)	0.910824
	cg26502817	6	HSPA1L	31779953	rs114141192	6	31165843	T	C	0.0736196	0.112636	0.0553457	0.041838	-0.445491	0.0715979	4.90482e-10	-0.252835	0.130712	0.0530774			-0.509031	0.00336052	0.776596	0.601078	1.00337	0.777(0.601,1.003)	0.910824
	cg26183504	5	PIK3R1	67648495	rs12108976	5	67651015	C	A	0.091002	0.123873	0.0628301	0.0486609	-0.482829	0.0550787	1.84854e-18	-0.256556	0.13338	0.0544169	0.918805	3	-0.517981	0.0048688	0.773712	0.595722	1.00488	0.774(0.596,1.005)	0.910824
	cg13410000	15	FURIN	91357521	rs17274947	15	91361016	A	G	0.168712	0.0846388	0.0428103	0.048034	0.339958	0.0417467	3.84479e-16	0.248968	0.129586	0.0546995	0.733061	20	-0.00502056	0.502957	1.2827	0.994992	1.6536	1.283(0.995,1.654)	0.910824
	cg26308477	20	PIGT	44065479	rs73124654	20	44058109	T	A	0.0603272	0.178175	0.0905346	0.0490641	0.629383	0.0730316	6.81598e-18	0.283095	0.14755	0.0550298	0.0822598	4	-0.006103	0.572293	1.32723	0.993916	1.77233	1.327(0.994,1.772)	0.910824
	cg20651995	2	GFPT1	69525471	rs4077916	2	69527512	T	C	0.373211	-0.074916	0.0382295	0.0500378	0.292486	0.0330588	8.95441e-19	-0.256135	0.133873	0.0557133	0.700438	20	-0.518526	0.00625608	0.774037	0.595397	1.00628	0.774(0.595,1.006)	0.910824
	cg27144224	6	MICA	31371837	rs72866766	6	31321184	C	T	0.0940695	-0.134681	0.0699133	0.0540544	0.999789	0.0616448	3.72939e-59	-0.134709	0.0704196	0.055754	0.0547443	14	-0.272731	0.00331342	0.87397	0.761297	1.00332	0.874(0.761,1.003)	0.910824
	cg25583983	6	MICA	31371820	rs72866766	6	31321184	C	T	0.0940695	-0.134681	0.0699133	0.0540544	0.953628	0.0617374	7.96206e-54	-0.14123	0.0738809	0.0559286	0.055654	14	-0.286037	0.00357656	0.86829	0.751235	1.00358	0.868(0.751,1.004)	0.910824
	cg01895612	11	H19	2020286	rs2107425	11	2021075	T	C	0.305726	-0.0749265	0.0386247	0.0523968	-0.381701	0.0342792	8.46837e-29	0.196296	0.102715	0.0559948	0.461973	17	-0.0050254	0.397617	1.21689	0.994987	1.48827	1.217(0.995,1.488)	0.910824
	cg25281616	11	H19	2020279	rs2107425	11	2021075	T	C	0.305726	-0.0749265	0.0386247	0.0523968	-0.382988	0.0347727	3.27051e-28	0.195637	0.102403	0.0560748	0.466539	17	-0.00507288	0.396347	1.21609	0.99494	1.48638	1.216(0.995,1.486)	0.910824
	cg09013975	17	ATP2A3	3847872	rs730900	17	3851451	T	C	0.256646	0.0790743	0.0397266	0.04654	-0.147809	0.0218467	1.32636e-11	-0.534976	0.28016	0.0561925	0.915417	10	-1.08409	0.0141376	0.585683	0.33821	1.01424	0.586(0.338,1.014)	0.910824
	cg12036877	1	BGLAP	156211896	rs2253358	1	156228060	C	T	0.231084	-0.081984	0.0428378	0.055643	0.665511	0.0367411	2.49267e-73	-0.12319	0.0647266	0.0570109	0.49498	20	-0.250054	0.00367414	0.884096	0.778759	1.00368	0.884(0.779,1.004)	0.910824
	cg09996284	1	BGLAP	156211851	rs2253358	1	156228060	C	T	0.231084	-0.081984	0.0428378	0.055643	0.550226	0.0376163	1.8808e-48	-0.149001	0.0785186	0.0577426	0.647086	20	-0.302897	0.00489546	0.861568	0.738675	1.00491	0.862(0.739,1.005)	0.910824
	cg06799180	5	PDCD6	266963	rs1574220	5	314518	C	T	0.0674847	0.14228	0.0713504	0.0461406	-0.35595	0.0579234	7.98722e-10	-0.39972	0.21074	0.0578621	0.996691	9	-0.81277	0.0133304	0.670508	0.443627	1.01342	0.671(0.444,1.013)	0.910824
	cg00025823	17	CRHR1	43909151	rs17763104	17	43905795	A	G	0.116564	-0.117307	0.0585747	0.0452099	-0.276273	0.0469763	4.07499e-09	0.424607	0.223973	0.0579876	0.148386	4	-0.0143801	0.863594	1.52899	0.985723	2.37167	1.529(0.986,2.372)	0.910824
	cg13282594	1	BGLAP	156211609	rs2253358	1	156228060	C	T	0.231084	-0.081984	0.0428378	0.055643	0.482411	0.0378569	3.41013e-37	-0.169946	0.0897954	0.0584117	0.661465	20	-0.345945	0.00605298	0.84371	0.707551	1.00607	0.844(0.708,1.006)	0.910824
	cg09152813	2	NCK2	106391379	rs6736701	2	106390440	T	G	0.457055	-0.0669288	0.0353979	0.0586568	-1.04514	0.0256496	0	0.0640381	0.0339055	0.0589288	0.987019	20	-0.00241668	0.130493	1.06613	0.997586	1.13939	1.066(0.998,1.139)	0.910824
	cg09271097	7	CREB3L2	137620868	rs273988	7	137624559	A	G	0.5	-0.0656004	0.0345626	0.0576934	-0.566933	0.0306043	1.30731e-76	0.115711	0.0612833	0.0590078	0.582901	20	-0.00440427	0.235826	1.12267	0.995605	1.26595	1.123(0.996,1.266)	0.910824
	cg02866639	17	RPA1	1808743	rs62067518	17	1828855	A	C	0.109407	-0.124503	0.0644913	0.0535402	-0.428796	0.0498335	7.66025e-18	0.290355	0.15414	0.0596044	0.442799	9	-0.0117594	0.592469	1.3369	0.988309	1.80845	1.337(0.988,1.808)	0.910824
	cg25134647	12	KRAS	25454990	rs4963868	12	25454814	T	C	0.431493	0.0653578	0.0347042	0.0596623	1.2713	0.0152705	0	0.0514102	0.0273052	0.0597276	0.719168	20	-0.00210799	0.104928	1.05275	0.997894	1.11063	1.053(0.998,1.111)	0.910824
	cg21436520	6	GCLC	53413189	rs510088	6	53408789	A	G	0.313906	0.0741496	0.0381428	0.0518956	0.257073	0.034292	6.55048e-14	0.288438	0.153281	0.0598689	0.800068	3	-0.0119928	0.588869	1.33434	0.988079	1.80195	1.334(0.988,1.802)	0.910824
	cg17880118	13	COL4A1	110892021	rs656034	13	110889842	G	A	0.153374	-0.0947727	0.0502214	0.0591474	-0.955163	0.0409157	1.56225e-120	0.0992215	0.0527504	0.0599773	0.31962	20	-0.00416928	0.202612	1.10431	0.995839	1.2246	1.104(0.996,1.225)	0.910824
	cg15349474	11	CHEK1	125494878	rs551711	11	125567128	C	T	0.158487	0.0938618	0.0482262	0.0516211	-0.300705	0.0419014	7.152e-13	-0.312139	0.166171	0.0603229	0.736359	13	-0.637834	0.0135562	0.73188	0.528436	1.01365	0.732(0.528,1.014)	0.910824
	cg08642081	11	SERPINH1	75293457	rs694844	11	75295368	A	T	0.47137	0.0692691	0.0357304	0.0525429	-0.243829	0.0322975	4.37019e-14	-0.284089	0.151293	0.0604174	0.337184	12	-0.580623	0.0124453	0.7527	0.55955	1.01252	0.753(0.56,1.013)	0.910824
	cg00776405	8	TG	133967862	rs2741225	8	133956084	A	C	0.399796	-0.0700073	0.0354137	0.0480594	-0.193874	0.0324501	2.30759e-09	0.361097	0.192403	0.0605489	0.131873	7	-0.0160129	0.738207	1.4349	0.984115	2.09218	1.435(0.984,2.092)	0.910824
	cg14663278	1	BGLAP	156211409	rs2253358	1	156228060	C	T	0.231084	-0.081984	0.0428378	0.055643	0.366923	0.0383394	1.06498e-21	-0.223436	0.11906	0.0605639	0.657439	7	-0.456794	0.0099216	0.799766	0.633311	1.00997	0.8(0.633,1.01)	0.910824
	cg17589175	11	PRDX5	64085337	rs11231741	11	64046885	T	C	0.299591	0.070026	0.0364442	0.0546738	-0.284662	0.0337056	3.02666e-17	-0.245997	0.131298	0.0609882	0.646443	15	-0.503341	0.0113471	0.781925	0.604508	1.01141	0.782(0.605,1.011)	0.910824
	cg20049005	11	H19	2025906	rs11042194	11	2028062	A	G	0.40593	-0.0695874	0.0358647	0.0523462	-0.232825	0.0327293	1.13015e-12	0.298883	0.159669	0.0612211	0.323062	19	-0.0140682	0.611834	1.34835	0.98603	1.84381	1.348(0.986,1.844)	0.910824
	cg06489569	16	JPH3	87589319	rs2334209	16	87589322	A	G	0.436605	0.0664265	0.0347126	0.0556693	-0.289861	0.0329321	1.34673e-18	-0.229167	0.122554	0.0614934	0.173187	20	-0.469373	0.0110388	0.795196	0.625394	1.0111	0.795(0.625,1.011)	0.910824
	cg07163735	17	MAPT	43971906	rs538628	17	44787313	C	G	0.219836	0.0906771	0.0467716	0.0525353	0.277663	0.0396437	2.48826e-12	0.326573	0.174782	0.0616978	0.795872	12	-0.0159997	0.669146	1.38621	0.984128	1.95257	1.386(0.984,1.953)	0.910824
	cg14762436	7	OSBPL3	24917750	rs6979475	7	24917974	A	G	0.262781	0.0733444	0.0392721	0.0618187	-1.38572	0.0217789	0	-0.0529287	0.0283528	0.061931	0.745124	20	-0.1085	0.00264279	0.948448	0.897179	1.00265	0.948(0.897,1.003)	0.910824
	cg12457376	22	COMT	19928061	rs9606186	22	19920359	C	G	0.415133	0.0663221	0.0349848	0.0579947	-0.341731	0.032976	3.65239e-25	-0.194077	0.104074	0.0622104	0.696606	17	-0.398062	0.00990804	0.823594	0.67162	1.00996	0.824(0.672,1.01)	0.910824
	cg14379630	6	MICB	31461850	rs2395043	6	31461966	T	C	0.283231	-0.0712236	0.038127	0.0617534	-0.676567	0.030246	7.92797e-111	0.105272	0.0565498	0.0626621	0.832494	20	-0.00556561	0.21611	1.11101	0.99445	1.24124	1.111(0.994,1.241)	0.910824
	cg16018154	17	RPTOR	78863570	rs11870045	17	78864421	T	C	0.448875	0.0735815	0.0394422	0.0621038	-0.722515	0.0300528	1.02303e-127	-0.101841	0.0547542	0.0628908	0.86204	20	-0.209159	0.00547723	0.903173	0.811266	1.00549	0.903(0.811,1.005)	0.910824
	cg18079499	14	CALM3	90868646	rs941501	14	90975018	T	C	0.470348	0.0652606	0.0342552	0.0567635	-0.278906	0.0329008	2.30734e-17	-0.233988	0.125883	0.0630603	0.762953	7	-0.480719	0.0127427	0.791371	0.618339	1.01282	0.791(0.618,1.013)	0.910824
	cg09277749	1	TMCO1	165826270	rs12125493	1	165847489	C	T	0.425358	-0.0693767	0.0352478	0.0490387	0.182242	0.0326066	2.28238e-08	-0.380685	0.205055	0.0633822	0.677981	6	-0.782593	0.0212228	0.683393	0.457219	1.02145	0.683(0.457,1.021)	0.910824
	cg22763897	20	PIGT	44065402	rs73124654	20	44058109	T	A	0.0603272	0.178175	0.0905346	0.0490641	0.401211	0.0727032	3.41946e-08	0.444093	0.239573	0.0637845			-0.0254701	0.913656	1.55908	0.974852	2.49342	1.559(0.975,2.493)	0.910824
	cg00022866	11	CCDC88B	64108440	rs7122759	11	64089673	T	C	0.302658	0.067263	0.0362394	0.0634429	-0.979041	0.0290035	8.7408e-250	-0.0687029	0.0370711	0.0638429	0.778078	20	-0.141362	0.00395646	0.933604	0.868175	1.00396	0.934(0.868,1.004)	0.910824
	cg17464989	19	JSRP1	2255419	rs2865074	19	2255819	T	C	0.165644	-0.10357	0.0531536	0.0513539	-0.244862	0.0409779	2.29432e-09	0.422974	0.228325	0.0639529	0.655901	6	-0.024543	0.870491	1.52649	0.975756	2.38808	1.526(0.976,2.388)	0.910824
	cg17034036	11	CAT	34461028	rs61882280	11	34516093	T	C	0.253579	-0.0779677	0.0410753	0.0576745	0.311562	0.037626	1.22672e-16	-0.250248	0.135256	0.0642883	0.966926	20	-0.51535	0.0148538	0.778608	0.597292	1.01496	0.779(0.597,1.015)	0.910824
	cg12041056	22	MIAT	27053247	rs8142049	22	27067792	T	C	0.364008	-0.0676616	0.0355944	0.0573139	-0.25239	0.0326687	1.11201e-14	0.268084	0.145235	0.0649131	0.752078	20	-0.0165766	0.552745	1.30746	0.98356	1.73802	1.307(0.984,1.738)	0.910824
	cg03539623	11	SERPINH1	75294284	rs1228367	11	75294238	C	A	0.470348	0.0650272	0.0351481	0.0643002	0.748846	0.0289321	1.03752e-147	0.0868365	0.0470561	0.0649816	0.260972	20	-0.00539346	0.179066	1.09072	0.994621	1.1961	1.091(0.995,1.196)	0.910824
	cg11712482	22	COMT	19928667	rs3788319	22	19929551	A	G	0.472393	0.0648565	0.0349859	0.0637689	0.545226	0.0304905	1.63421e-71	0.118954	0.0645115	0.0651962	0.823087	20	-0.00748854	0.245397	1.12632	0.992539	1.27813	1.126(0.993,1.278)	0.910824
	cg11608582	17	ATP2A3	3843121	rs1800912	17	3844787	G	C	0.255624	0.0764394	0.0400572	0.0563582	-0.259628	0.0370728	2.50194e-12	-0.294419	0.159912	0.0656026	0.838974	10	-0.607847	0.0190085	0.744964	0.544522	1.01919	0.745(0.545,1.019)	0.910824
	cg26677004	1	TOR1AIP2	179787968	rs2777914	1	179790983	A	G	0.351738	-0.0684537	0.0355433	0.0541143	-0.214057	0.0343811	4.78488e-10	0.319792	0.173809	0.0657825	0.0514928	6	-0.0208736	0.660458	1.37684	0.979343	1.93568	1.377(0.979,1.936)	0.910824
	cg19227924	17	SLC6A4	28565709	rs11656408	17	28637173	G	A	0.382413	-0.066962	0.0354194	0.0586848	0.273702	0.0344523	1.95164e-15	-0.244653	0.133022	0.0658877	0.757892	20	-0.505376	0.0160701	0.782976	0.603279	1.0162	0.783(0.603,1.016)	0.910824
	cg18397357	17	SLC6A4	28565258	rs11656408	17	28637173	G	A	0.382413	-0.066962	0.0354194	0.0586848	0.272739	0.03449	2.62051e-15	-0.245517	0.133525	0.065955	0.843067	20	-0.507226	0.016192	0.7823	0.602164	1.01632	0.782(0.602,1.016)	0.910824
	cg07687610	12	DNM1L	32832045	rs1971910	12	32897437	C	T	0.171779	0.101236	0.052181	0.0523685	-0.266647	0.0463116	8.52817e-09	-0.379663	0.206504	0.0659852			-0.784411	0.0250848	0.684092	0.456389	1.0254	0.684(0.456,1.025)	0.910824
	cg06749854	11	H19	2020030	rs2107425	11	2021075	T	C	0.305726	-0.0749265	0.0386247	0.0523968	-0.194454	0.0341028	1.18411e-08	0.385318	0.209812	0.0662852	0.266348	3	-0.0259135	0.79655	1.47008	0.974419	2.21787	1.47(0.974,2.218)	0.910824
	cg23922804	12	NR4A1	52436085	rs744690	12	52441484	G	T	0.200409	-0.0885932	0.0479829	0.0648413	-0.623183	0.0418328	3.44796e-50	0.142162	0.0775856	0.0669022	0.248184	20	-0.00990578	0.29423	1.15276	0.990143	1.34209	1.153(0.99,1.342)	0.910824
	cg05377161	11	SERPINH1	75294346	rs1228367	11	75294238	C	A	0.470348	0.0650272	0.0351481	0.0643002	0.397685	0.0300334	5.05755e-40	0.163514	0.0892402	0.0669076	0.289501	20	-0.0113968	0.338425	1.17764	0.988668	1.40274	1.178(0.989,1.403)	0.910824
	cg05188837	16	JPH3	87605249	rs4843630	16	87593599	T	C	0.264826	-0.0732561	0.0386074	0.0577667	0.245164	0.0358327	7.81422e-12	-0.298804	0.163419	0.0674818	0.827056	20	-0.619105	0.0214972	0.741705	0.538426	1.02173	0.742(0.538,1.022)	0.910824
	cg07219769	22	LGALS1	38071455	rs62236672	22	38074343	T	C	0.331288	0.0671508	0.0365684	0.0663124	0.603137	0.032636	2.95215e-76	0.111336	0.0609289	0.0676535	0.635788	20	-0.00808464	0.230757	1.11777	0.991948	1.25955	1.118(0.992,1.26)	0.910824
	cg16847696	7	GPR37	124405760	rs2267708	7	124392512	T	C	0.49591	0.0667809	0.0346349	0.0538381	0.183344	0.0322731	1.33899e-08	0.364238	0.199491	0.0678742	0.594141	8	-0.0267644	0.75524	1.43942	0.973591	2.12812	1.439(0.974,2.128)	0.910824
	cg15926585	22	COMT	19928445	rs5746847	22	19921003	T	C	0.41411	0.0656275	0.0349735	0.0605876	0.250888	0.032455	1.07263e-14	0.261581	0.143447	0.0682222	0.931687	17	-0.0195751	0.542737	1.29898	0.980615	1.72071	1.299(0.981,1.721)	0.910824
	cg21925465	7	CD36	79998779	rs304775	7	80003674	G	A	0.241309	0.0787541	0.0416149	0.0584311	-0.265574	0.0390509	1.04104e-11	-0.296543	0.162652	0.0682767	0.254723	7	-0.615341	0.0222549	0.743384	0.540457	1.0225	0.743(0.54,1.023)	0.910824
	cg00908042	22	CYB5R3	43059020	rs135095	22	43064857	T	C	0.125767	-0.0913225	0.0495029	0.0650681	-0.576702	0.0487509	2.74575e-32	0.158353	0.0868755	0.0683399	0.541741	20	-0.011923	0.328629	1.17158	0.988148	1.38906	1.172(0.988,1.389)	0.910824
	cg23353432	20	MMP9	44639847	rs3918249	20	44638136	C	T	0.381391	-0.0668891	0.0357944	0.061664	-0.275885	0.0346136	1.58137e-15	0.242453	0.133262	0.0688553	0.650799	16	-0.0187405	0.503647	1.27437	0.981434	1.65474	1.274(0.981,1.655)	0.910824
	cg03001484	6	LMBRD1	70507230	rs4707384	6	70508734	A	G	0.449898	0.0647229	0.0353815	0.0673565	-0.506021	0.0327694	8.55838e-54	-0.127906	0.0704099	0.0692805	0.555158	20	-0.265909	0.0100974	0.879936	0.766509	1.01015	0.88(0.767,1.01)	0.910824
	cg05222850	7	CREB3L2	137618712	rs13228781	7	137629249	T	C	0.0981595	0.107933	0.0593119	0.0687953	-1.29345	0.0473798	4.28716e-164	-0.0834462	0.0459573	0.0694115	0.552593	13	-0.173523	0.00663011	0.919941	0.840698	1.00665	0.92(0.841,1.007)	0.910824
	cg12241333	15	MIR211	31355430	rs7166442	15	31355824	T	C	0.436605	-0.0672485	0.035185	0.0559683	-0.192667	0.0333882	7.9029e-09	0.34904	0.192377	0.0696236	0.0782392	14	-0.0280189	0.726099	1.41771	0.97237	2.067	1.418(0.972,2.067)	0.910824
	cg03591376	19	RTN2	45998201	rs60396460	19	46003546	C	T	0.097137	0.107678	0.0589029	0.0675401	0.644952	0.0500557	5.48998e-38	0.166955	0.0922437	0.0703056	0.35731	17	-0.0138427	0.347753	1.1817	0.986253	1.41588	1.182(0.986,1.416)	0.910824
	cg08762424	6	HLA-C	31275881	rs114151681	6	31269697	A	G	0.0623722	0.127045	0.0700557	0.0697573	2.28551	0.0797617	1.41987e-180	0.0555871	0.0307135	0.0703172	0.920956	20	-0.00461136	0.115786	1.05716	0.995399	1.12276	1.057(0.995,1.123)	0.910824
	cg17250082	6	HLA-C	31275875	rs114151681	6	31269697	A	G	0.0623722	0.127045	0.0700557	0.0697573	2.092	0.0832444	2.2907e-139	0.0607289	0.0335745	0.0704852	0.938318	20	-0.00507712	0.126535	1.06261	0.994936	1.13489	1.063(0.995,1.135)	0.910824
	cg13758780	9	DAB2IP	124329514	rs548828	9	124329828	A	G	0.353783	0.0656676	0.0359563	0.0678022	0.43645	0.034234	3.15725e-37	0.150459	0.0832245	0.0706277	0.200699	20	-0.012661	0.313579	1.16237	0.987419	1.36831	1.162(0.987,1.368)	0.910824
	cg06077899	12	DNM1L	32832894	rs10844299	12	32844234	A	G	0.161554	0.0909717	0.0501245	0.0695367	0.707965	0.0435973	2.68473e-59	0.128498	0.0712416	0.0712805	0.0826551	20	-0.0111355	0.268132	1.13712	0.988926	1.30752	1.137(0.989,1.308)	0.910824
	cg16976520	7	ESYT2	158588852	rs7787431	7	158606039	C	T	0.108384	-0.09848	0.0542208	0.069328	0.747238	0.049808	7.08558e-51	-0.131792	0.0730915	0.0713709	0.919626	20	-0.275051	0.0114673	0.876523	0.759533	1.01153	0.877(0.76,1.012)	0.910824
	cg04153489	8	ANK1	41655983	rs10092989	8	41665510	T	G	0.138037	0.102345	0.0548593	0.0620979	-0.299202	0.0436409	7.08124e-12	-0.342061	0.190019	0.0718384	0.500594	3	-0.714498	0.0303762	0.710305	0.489438	1.03084	0.71(0.489,1.031)	0.910824
	cg10441070	6	ESR1	152126250	rs488133	6	152125444	T	C	0.323108	0.0696367	0.0370592	0.0602356	-0.212683	0.0342727	5.44871e-10	-0.32742	0.182059	0.0721096	0.125692	11	-0.684256	0.0294156	0.720781	0.504466	1.02985	0.721(0.504,1.03)	0.910824
	cg20733077	13	DLEU2	50700845	rs2066590	13	50701190	A	G	0.214724	-0.080209	0.0444478	0.0711423	0.801661	0.0376321	1.07446e-100	-0.100054	0.0556432	0.0721568	0.553206	20	-0.209115	0.00900667	0.904789	0.811302	1.00905	0.905(0.811,1.009)	0.910824
	cg08004525	13	DLEU2	50703549	rs2066590	13	50701190	A	G	0.214724	-0.080209	0.0444478	0.0711423	-0.767822	0.0378104	1.11092e-91	0.104463	0.0581162	0.0722587	0.520216	20	-0.00944475	0.218371	1.11011	0.9906	1.24405	1.11(0.991,1.244)	0.910824
	cg14352032	17	SLC6A4	28564834	rs11656408	17	28637173	G	A	0.382413	-0.066962	0.0354194	0.0586848	0.197855	0.0344606	9.38458e-09	-0.33844	0.188472	0.0725418	0.334817	15	-0.707845	0.0309651	0.712882	0.492705	1.03145	0.713(0.493,1.031)	0.910824
	cg22157087	6	ESR1	152012887	rs3020333	6	152010254	G	A	0.468303	0.0625797	0.0348894	0.0728673	0.991993	0.0253134	0	0.0630848	0.0352078	0.0731674	0.0222673	20	-0.00592249	0.132092	1.06512	0.994095	1.14121	1.065(0.994,1.141)	0.910824
	cg18241337	3	SSR3	156271892	rs3821686	3	156265940	T	C	0.283231	0.0712592	0.0395978	0.0719278	0.666192	0.0360866	4.26019e-76	0.106965	0.0597208	0.0732796	0.469779	20	-0.0100878	0.224018	1.1129	0.989963	1.25109	1.113(0.99,1.251)	0.910824
	cg08904394	11	CCDC88B	64108902	rs11231749	11	64095178	C	T	0.302658	0.0674797	0.0363233	0.0632038	0.227088	0.0350156	8.85328e-11	0.297152	0.166386	0.0741112	0.15349	15	-0.0289646	0.623269	1.34602	0.971451	1.86501	1.346(0.971,1.865)	0.910824
	cg07980830	8	GRINA	145063362	rs11784833	8	145063412	C	T	0.384458	0.0646358	0.0361789	0.0740081	1.1944	0.022266	0	0.0541157	0.0303072	0.0741684	0.0504767	20	-0.00528641	0.113518	1.05561	0.994728	1.12021	1.056(0.995,1.12)	0.910824
	cg12094903	6	TAP2	32808689	rs9276810	6	32810443	A	G	0.451943	-0.0618191	0.0343799	0.0721581	-0.447773	0.0311704	8.53869e-47	0.138059	0.0773788	0.0743917	0.471679	20	-0.0136034	0.289721	1.14804	0.986489	1.33606	1.148(0.986,1.336)	0.910824
	cg17419597	1	BGLAP	156211529	rs2540168	1	156223823	C	T	0.246421	-0.0772408	0.042903	0.0718044	0.485958	0.0367345	5.97436e-40	-0.158945	0.0890993	0.074438	0.819801	17	-0.33358	0.0156896	0.853043	0.716355	1.01581	0.853(0.716,1.016)	0.910824
	cg11251858	6	ESR1	152129036	rs2077647	6	152129077	C	T	0.441718	-0.0634515	0.0343628	0.0648169	-0.219488	0.0326848	1.87701e-11	0.289089	0.16237	0.0750046	0.0145154	12	-0.0291562	0.607334	1.33521	0.971265	1.83553	1.335(0.971,1.836)	0.910824
	cg21551182	2	NCK2	106399873	rs7602442	2	106402795	C	T	0.448875	-0.0636678	0.0354274	0.0723147	-0.409872	0.0328548	1.01865e-35	0.155336	0.0873276	0.0752775	0.850891	20	-0.0158261	0.326498	1.16805	0.984298	1.38611	1.168(0.984,1.386)	0.910824
	cg23476401	11	H19	2020296	rs2251375	11	2019496	A	C	0.305726	-0.0697199	0.0387599	0.0720562	-0.414191	0.0349679	2.28708e-32	0.168328	0.0946527	0.0753425	0.609576	18	-0.0171913	0.353847	1.18332	0.982956	1.42454	1.183(0.983,1.425)	0.910824
	cg23552192	8	UBXN2B	59323544	rs12681835	8	59275360	A	G	0.290389	-0.075014	0.0402615	0.0624386	0.216163	0.0365979	3.49597e-09	-0.347025	0.195302	0.0755914	0.422366	8	-0.729817	0.0357669	0.706788	0.481997	1.03641	0.707(0.482,1.036)	0.910824
	cg00237904	11	H19	2020314	rs2251375	11	2019496	A	C	0.305726	-0.0697199	0.0387599	0.0720562	-0.391939	0.0345722	8.62243e-30	0.177885	0.10013	0.075644	0.604261	19	-0.0183698	0.37414	1.19469	0.981798	1.45374	1.195(0.982,1.454)	0.910824
	cg02886509	11	H19	2020556	rs2251375	11	2019496	A	C	0.305726	-0.0697199	0.0387599	0.0720562	-0.396428	0.0354673	5.26876e-29	0.17587	0.0990309	0.0757473	0.558203	20	-0.0182306	0.369971	1.19228	0.981935	1.44769	1.192(0.982,1.448)	0.910824
	cg17145806	1	ICMT	6295537	rs3747974	1	6285458	C	T	0.102249	0.125039	0.067609	0.0643935	0.375486	0.0593819	2.56127e-10	0.333006	0.187601	0.0758851	0.993521	5	-0.034692	0.700704	1.39516	0.965903	2.01517	1.395(0.966,2.015)	0.910824
	cg07428004	7	LEP	127912372	rs4731437	7	127912566	T	C	0.141104	-0.0934721	0.0524783	0.0748869	0.904437	0.0469606	1.17557e-82	-0.103348	0.0582708	0.0761313	0.0308747	6	-0.217559	0.0108628	0.901813	0.80448	1.01092	0.902(0.804,1.011)	0.910824
	cg00240178	6	EEF1A1	74232108	rs59021418	6	74139212	A	G	0.0388548	-0.162301	0.0876707	0.0641318	0.492283	0.0800709	7.84219e-10	-0.329691	0.185988	0.0762877	0.900689	3	-0.694227	0.0348455	0.719146	0.49946	1.03546	0.719(0.499,1.035)	0.910824
	cg24843609	1	BGLAP	156211434	rs1800247	1	156211825	C	T	0.230061	-0.0789767	0.0443178	0.0747404	0.627676	0.0377017	3.10495e-62	-0.125824	0.0710095	0.0764058	0.627412	20	-0.265003	0.0133546	0.88177	0.767204	1.01344	0.882(0.767,1.013)	0.910824
	cg07212837	8	GRINA	145068773	rs11136252	8	145084493	C	T	0.40593	0.0649283	0.035394	0.0665879	-0.223916	0.0327483	8.05954e-12	-0.289967	0.163658	0.0764301	0.0798304	20	-0.610737	0.0308027	0.748288	0.542951	1.03128	0.748(0.543,1.031)	0.910824
	cg12048225	6	TAP2	32808669	rs9276810	6	32810443	A	G	0.451943	-0.0618191	0.0343799	0.0721581	-0.332069	0.0321268	4.83363e-25	0.186163	0.105087	0.0764754	0.553956	20	-0.0198075	0.392134	1.20462	0.980387	1.48014	1.205(0.98,1.48)	0.910824
	cg04581938	6	MICA	31364999	rs3130922	6	31461089	A	G	0.325153	-0.0681059	0.0369075	0.0649921	0.212726	0.0339215	3.58449e-10	-0.320158	0.180853	0.0766833	0.739851	16	-0.67463	0.0343139	0.726034	0.509345	1.03491	0.726(0.509,1.035)	0.910824
	cg02561726	2	DUSP19	183943938	rs72890325	2	183928068	G	T	0.104294	0.112447	0.060949	0.065048	-0.34751	0.0553458	3.41018e-10	-0.323578	0.182802	0.0767108	0.77202	13	-0.68187	0.0347139	0.723556	0.505671	1.03532	0.724(0.506,1.035)	0.910824
	cg18491744	8	ANK1	41580834	rs2304871	8	41585438	A	G	0.267894	0.0694242	0.0390961	0.0757767	-0.633732	0.0349969	2.74485e-73	-0.109548	0.0619877	0.0771851	0.15596	20	-0.231044	0.0119479	0.896239	0.793705	1.01202	0.896(0.794,1.012)	0.910824
	cg11519176	1	BGLAP	156211801	rs2540168	1	156223823	C	T	0.246421	-0.0772408	0.042903	0.0718044	0.342547	0.0370642	2.4196e-20	-0.22549	0.127601	0.0772049	0.921498	12	-0.475588	0.024608	0.798125	0.62152	1.02491	0.798(0.622,1.025)	0.910824
	cg25574978	11	H19	2020496	rs2251375	11	2019496	A	C	0.305726	-0.0697199	0.0387599	0.0720562	-0.335691	0.0358811	8.30817e-21	0.207691	0.117578	0.077327	0.467476	15	-0.0227619	0.438144	1.23083	0.977495	1.54983	1.231(0.977,1.55)	0.910824
	cg23165623	6	ESR1	152128411	rs2077647	6	152129077	C	T	0.441718	-0.0634515	0.0343628	0.0648169	-0.197995	0.0328547	1.67666e-09	0.32047	0.181518	0.0774795	0.138912	6	-0.0353053	0.676245	1.37778	0.965311	1.96648	1.378(0.965,1.966)	0.910824
	cg24304618	18	CYB5A	71959402	rs77731706	18	71956673	A	G	0.101227	0.0956175	0.0530583	0.0715261	0.399615	0.045464	1.49964e-18	0.239274	0.135535	0.0774966	0.650838	20	-0.0263746	0.504923	1.27033	0.97397	1.65686	1.27(0.974,1.657)	0.910824
	cg08948964	11	DRD2	113285594	rs11608109	11	113303448	G	C	0.388548	-0.0643646	0.035459	0.0694956	-0.243325	0.0322395	4.43956e-14	0.264521	0.149882	0.0775873	0.978224	19	-0.0292477	0.55829	1.30281	0.971176	1.74768	1.303(0.971,1.748)	0.910824
	cg14948434	7	SUMF2	56132159	rs10274148	7	56093454	G	T	0.207566	-0.0722033	0.0408992	0.0774971	-1.22762	0.0270167	0	0.0588157	0.033341	0.0777209	0.165751	20	-0.00653266	0.124164	1.06058	0.993489	1.1322	1.061(0.993,1.132)	0.910824
	cg11580676	1	BGLAP	156211415	rs1800247	1	156211825	C	T	0.230061	-0.0789767	0.0443178	0.0747404	0.479371	0.0387277	3.43855e-35	-0.164751	0.0934031	0.0777542	0.756189	19	-0.347821	0.0183191	0.848105	0.706225	1.01849	0.848(0.706,1.018)	0.910824
	cg02657360	11	H19	2020560	rs2251375	11	2019496	A	C	0.305726	-0.0697199	0.0387599	0.0720562	-0.321351	0.0358059	2.83824e-19	0.216959	0.123014	0.0777845	0.343244	20	-0.0241484	0.458066	1.24229	0.976141	1.58101	1.242(0.976,1.581)	0.910824
	cg06517429	10	CASP7	115439635	rs3127111	10	115410828	A	T	0.376278	-0.062733	0.0352383	0.0750347	-0.427128	0.0338361	1.56826e-36	0.146872	0.0833168	0.0779328	0.650176	20	-0.0164289	0.310173	1.15821	0.983705	1.36366	1.158(0.984,1.364)	0.910824
	cg27650870	8	ANK1	41583136	rs1025870	8	41594628	A	G	0.43047	-0.0628536	0.0352969	0.0749596	0.396908	0.0325826	3.89608e-34	-0.158358	0.0898749	0.0780718	0.558303	20	-0.334513	0.0177968	0.853544	0.715687	1.01796	0.854(0.716,1.018)	0.910824
	cg11381564	6	TAP2	32808619	rs9276810	6	32810443	A	G	0.451943	-0.0618191	0.0343799	0.0721581	-0.278387	0.0315787	1.18998e-18	0.222062	0.126039	0.0780958	0.527368	14	-0.0249744	0.469098	1.24865	0.975335	1.59855	1.249(0.975,1.599)	0.910824
	cg24670453	1	BGLAP	156211892	rs2540168	1	156223823	C	T	0.246421	-0.0772408	0.042903	0.0718044	0.312781	0.0369983	2.81667e-17	-0.246948	0.140242	0.0782605	0.806282	6	-0.521822	0.0279263	0.781181	0.593438	1.02832	0.781(0.593,1.028)	0.910824
	cg26826350	7	SHH	155592408	rs1636874	7	155586100	T	C	0.334356	-0.0696602	0.0383305	0.0691628	-0.254404	0.0358863	1.34928e-12	0.273817	0.15554	0.0783352	0.36496	9	-0.0310414	0.578675	1.31497	0.969435	1.78367	1.315(0.969,1.784)	0.910824
	cg27372170	11	H19	2021103	rs2251375	11	2019496	A	C	0.305726	-0.0697199	0.0387599	0.0720562	0.301869	0.0354508	1.66356e-17	-0.230961	0.131233	0.0784206	0.616034	20	-0.488178	0.0262557	0.79377	0.613744	1.0266	0.794(0.614,1.027)	0.910824
	cg23729443	1	BGLAP	156211840	rs2540168	1	156223823	C	T	0.246421	-0.0772408	0.042903	0.0718044	0.309787	0.0372581	9.20499e-17	-0.249335	0.141701	0.078479	0.831751	9	-0.527069	0.028399	0.779319	0.590333	1.02881	0.779(0.59,1.029)	0.910824
	cg24937136	1	PARP1	226593346	rs2255403	1	226576270	G	A	0.153374	-0.0802998	0.0455616	0.0779942	1.20653	0.0398363	1.69001e-201	-0.0665543	0.0378264	0.078498	0.642619	20	-0.140694	0.00758544	0.935612	0.868755	1.00761	0.936(0.869,1.008)	0.910824
	cg15716042	19	ACER1	6325134	rs112959873	19	6326113	A	G	0.0828221	0.125684	0.0682519	0.0655529	-0.388409	0.0674278	8.39319e-09	-0.323586	0.184482	0.0794266	0.172239	9	-0.685171	0.0379987	0.72355	0.504004	1.03873	0.724(0.504,1.039)	0.910824
	cg07311956	18	PTPN2	12911027	rs8083335	18	12902446	A	G	0.101227	0.106395	0.0598001	0.0752112	0.565871	0.0540799	1.26934e-25	0.18802	0.107195	0.0794306	0.864683	14	-0.0220822	0.398122	1.20686	0.97816	1.48903	1.207(0.978,1.489)	0.910824
	cg14646039	5	GRIA1	152729842	rs2974110	5	152632473	G	A	0.0787321	0.112761	0.0633539	0.0750986	-0.575476	0.0607786	2.84172e-21	-0.195944	0.112018	0.0802522	0.926291	10	-0.415499	0.0236113	0.822058	0.660011	1.02389	0.822(0.66,1.024)	0.910824
	cg25693349	6	TAP2	32808596	rs9276810	6	32810443	A	G	0.451943	-0.0618191	0.0343799	0.0721581	-0.236805	0.0321565	1.78299e-13	0.261055	0.149447	0.0806719	0.460636	15	-0.0318611	0.553971	1.2983	0.968641	1.74015	1.298(0.969,1.74)	0.910824
	cg26618058	12	NOS1	118022239	rs4767576	12	118040694	A	C	0.291411	-0.0711421	0.0392561	0.0699468	0.21716	0.034109	1.93198e-10	-0.327602	0.187951	0.0813307	0.592052	15	-0.695986	0.040782	0.72065	0.498583	1.04162	0.721(0.499,1.042)	0.910824
	cg24547396	22	COMT	19928740	rs5993883	22	19937638	T	G	0.468303	0.0604575	0.034515	0.0798374	0.504216	0.0315154	1.29798e-57	0.119904	0.0688619	0.0816441	0.620184	20	-0.0150653	0.254873	1.12739	0.985048	1.2903	1.127(0.985,1.29)	0.910824
	cg08198773	8	CLN8	1697536	rs6558523	8	1702504	T	C	0.246421	-0.0756544	0.0423173	0.0738099	-0.295405	0.0385353	1.77682e-14	0.256104	0.147096	0.0816715	0.353835	20	-0.0322042	0.544412	1.29189	0.968309	1.72359	1.292(0.968,1.724)	0.910824
	cg06765785	11	H19	2020391	rs2251375	11	2019496	A	C	0.305726	-0.0697199	0.0387599	0.0720562	-0.234811	0.0343345	7.97855e-12	0.296919	0.170683	0.0819297			-0.0376197	0.631458	1.34571	0.963079	1.88035	1.346(0.963,1.88)	0.910824
	cg20608990	2	CASP8	202097607	rs12620010	2	202099256	G	T	0.470348	0.0615525	0.0351254	0.0797113	0.436441	0.0320115	2.51884e-42	0.141033	0.0811436	0.0821992	0.100985	20	-0.0180085	0.300074	1.15146	0.982153	1.34996	1.151(0.982,1.35)	0.910824
	cg09977718	17	RPTOR	78854273	rs2016817	17	78859004	T	C	0.252556	0.0684829	0.0392848	0.0812917	-0.734158	0.0337454	6.08676e-105	-0.0932808	0.0536815	0.0822689	0.288996	20	-0.198497	0.0119349	0.910938	0.819963	1.01201	0.911(0.82,1.012)	0.910824
	cg17127702	1	PARP1	226594323	rs932002	1	226577306	T	C	0.153374	-0.0793836	0.0456375	0.0819574	1.3524	0.0383755	4.67436e-272	-0.0586983	0.0337866	0.0823298	0.367304	20	-0.12492	0.00752344	0.942991	0.882567	1.00755	0.943(0.883,1.008)	0.910824
	cg06485447	10	TIAL1	121357400	rs28652753	10	121357265	G	A	0.174847	-0.0797737	0.044968	0.0760612	-0.343111	0.0405762	2.76784e-17	0.232501	0.133913	0.0825259	0.137993	19	-0.0299685	0.49497	1.26175	0.970476	1.64045	1.262(0.97,1.64)	0.910824
	cg13831388	17	RPTOR	78857859	rs2016817	17	78859004	T	C	0.252556	0.0684829	0.0392848	0.0812917	0.643046	0.0338024	1.08608e-80	0.106498	0.0613477	0.0825697	0.22762	20	-0.0137435	0.226739	1.11238	0.986351	1.2545	1.112(0.986,1.255)	0.910824
	cg11023901	7	BRAF	140625783	rs1267636	7	140492039	C	T	0.0787321	0.110151	0.0627284	0.0790898	0.729665	0.0658128	1.45108e-28	0.150961	0.0870404	0.0828519	0.960381	20	-0.0196382	0.32156	1.16295	0.980553	1.37928	1.163(0.981,1.379)	0.910824
	cg21314106	2	FN1	216300292	rs1837121	2	216292331	G	A	0.233129	-0.0714483	0.0401307	0.075012	-0.271518	0.0362217	6.57912e-14	0.263144	0.151913	0.0832375	0.177431	7	-0.0346055	0.560893	1.30101	0.965986	1.75224	1.301(0.966,1.752)	0.910824
	cg21464091	20	PCNA	5100652	rs73074166	20	5112714	A	T	0.0817996	-0.113278	0.0644854	0.0789775	0.481894	0.0537736	3.20178e-19	-0.235069	0.136363	0.0847361	0.530095	10	-0.50234	0.0322025	0.790516	0.605113	1.03273	0.791(0.605,1.033)	0.910824
	cg16068808	7	ESYT2	158551361	rs6944346	7	158621602	A	G	0.0787321	-0.115575	0.0642396	0.0719995	-0.341353	0.0568445	1.91293e-09	0.338579	0.196456	0.0848101	0.58101	20	-0.0464748	0.723633	1.40295	0.954589	2.06191	1.403(0.955,2.062)	0.910824
	cg02894139	18	ADCYAP1	900972	rs2846583	18	902965	T	A	0.281186	0.0671142	0.0377009	0.0750476	-0.248137	0.0364015	9.31769e-12	-0.270472	0.157031	0.0849955	0.63964	8	-0.578253	0.0373088	0.763019	0.560877	1.03801	0.763(0.561,1.038)	0.910824
	cg23712594	1	PARP1	226591890	rs932002	1	226577306	T	C	0.153374	-0.0793836	0.0456375	0.0819574	0.549813	0.0453838	8.82426e-34	-0.144383	0.0838566	0.0851089	0.662321	20	-0.308742	0.0199759	0.865556	0.73437	1.02018	0.866(0.734,1.02)	0.910824
	cg06617879	17	RPTOR	78849431	rs2289762	17	78859110	A	G	0.253579	0.0684807	0.0392836	0.0812914	0.376392	0.0356566	4.76423e-26	0.18194	0.105782	0.0854422	0.192637	20	-0.0253927	0.389273	1.19954	0.974927	1.47591	1.2(0.975,1.476)	0.910824
	cg10957001	12	APAF1	99118507	rs79955712	12	99118508	A	G	0.095092	0.0980253	0.0570219	0.0855994	-1.95877	0.0359799	0	-0.0500443	0.0291256	0.0857554	0.779538	20	-0.10713	0.00704188	0.951187	0.898408	1.00707	0.951(0.898,1.007)	0.910824
	cg19938199	15	TPM1	63233164	rs923424	15	63242283	T	C	0.322086	-0.065689	0.0365721	0.0724704	-0.202611	0.0351171	7.94651e-09	0.324212	0.189048	0.0863509			-0.0463221	0.694746	1.38294	0.954734	2.0032	1.383(0.955,2.003)	0.910824
	cg01245766	14	ZFYVE1	73494282	rs10151436	14	73616095	T	A	0.104294	-0.104855	0.0594678	0.0778619	0.390224	0.053098	1.99507e-13	-0.268705	0.156719	0.0864239	0.528606	14	-0.575874	0.0384642	0.764369	0.562213	1.03921	0.764(0.562,1.039)	0.910824
	cg26675785	16	ABCC1	16170184	rs2074085	16	16195898	G	A	0.107362	0.0983499	0.0563647	0.0810048	-0.424436	0.0482764	1.47187e-18	-0.231719	0.135389	0.0869882	0.315604	13	-0.497081	0.0336434	0.793169	0.608303	1.03422	0.793(0.608,1.034)	0.910824
	cg02251850	17	RPTOR	78851503	rs2016817	17	78859004	T	C	0.252556	0.0684829	0.0392848	0.0812917	0.321685	0.0364157	1.01271e-18	0.212888	0.124477	0.0872184	0.625522	10	-0.0310869	0.456863	1.23725	0.969391	1.57911	1.237(0.969,1.579)	0.910824
	cg17182837	8	ANK1	41585554	rs1872877	8	41585571	C	T	0.359918	-0.0604368	0.0354053	0.0878222	0.994809	0.0276336	8.37208e-284	-0.0607522	0.03563	0.0881788	0.17139	20	-0.130587	0.0090826	0.941056	0.87758	1.00912	0.941(0.878,1.009)	0.910824
	cg25195673	2	GFPT1	69614945	rs6735037	2	69660104	C	A	0.380368	-0.0609322	0.0355137	0.0862105	0.446993	0.0325192	5.41988e-43	-0.136316	0.0800668	0.0886573	0.604081	20	-0.293247	0.0206149	0.872567	0.745838	1.02083	0.873(0.746,1.021)	0.910824
	cg00881894	2	SCN1A	166930521	rs1020852	2	166927659	T	C	0.217791	-0.0705412	0.0414281	0.0886171	-1.58655	0.021706	0	0.044462	0.0261191	0.0887036	0.189704	20	-0.00673144	0.0956554	1.04547	0.993291	1.10038	1.045(0.993,1.1)	0.910824
	cg13660174	9	SURF4	136238392	rs9411397	9	136188214	A	G	0.108384	0.103922	0.0590205	0.0782773	-0.329612	0.0513129	1.3311e-10	-0.315284	0.185666	0.0894833	0.94565	15	-0.679189	0.0486214	0.729582	0.507028	1.04982	0.73(0.507,1.05)	0.910824
	cg18590995	1	PARP1	226558496	rs12143101	1	226545785	C	G	0.154397	-0.0798068	0.046027	0.0829338	0.379183	0.0460038	1.68748e-16	-0.21047	0.124042	0.0897393	0.983935	15	-0.453592	0.0326523	0.810203	0.635342	1.03319	0.81(0.635,1.033)	0.910824
	cg15785389	6	TAP2	32802938	rs241430	6	32802820	T	C	0.406953	-0.0634659	0.0363241	0.0806008	-0.232175	0.0327642	1.37804e-12	0.273354	0.161137	0.089809	0.387899	7	-0.0424745	0.589183	1.31437	0.958415	1.80251	1.314(0.958,1.803)	0.910824
	cg20780708	1	CPT2	53662814	rs72673121	1	53662823	A	C	0.207566	0.0762047	0.0443123	0.0854837	0.34579	0.0380381	9.847e-20	0.220379	0.130421	0.0910761	0.922153	7	-0.0352462	0.476004	1.24655	0.965368	1.60963	1.247(0.965,1.61)	0.910824
	cg18039789	11	BRSK2	1422947	rs4255564	11	1405725	C	T	0.295501	0.0694809	0.0410418	0.0904688	0.84889	0.0335271	1.9478e-141	0.0818492	0.0484556	0.0911891	0.0984119	20	-0.0131238	0.176822	1.08529	0.986962	1.19342	1.085(0.987,1.193)	0.910824
	cg22402121	13	F7	113735031	rs491247	13	113735031	T	C	0.377301	-0.0778106	0.0460051	0.0907707	-0.830486	0.0300963	1.30292e-167	0.0936929	0.0554994	0.091377	0.20765	20	-0.0150859	0.202472	1.09822	0.985027	1.22443	1.098(0.985,1.224)	0.910824
	cg13872627	6	HLA-C	31238036	rs2523594	6	31326629	C	T	0.299591	-0.0660561	0.0390275	0.0905409	0.625339	0.03084	2.05727e-91	-0.105632	0.0626272	0.0916638	0.194164	20	-0.228381	0.0171173	0.899756	0.795821	1.01726	0.9(0.796,1.017)	0.910824
	cg10524915	14	SERPINA1	94857046	rs1122629	14	94855831	A	G	0.509202	0.0615833	0.0356774	0.0843268	0.259418	0.0327392	2.30389e-15	0.23739	0.140754	0.0916877	0.22339	10	-0.0384878	0.513268	1.26794	0.962243	1.67074	1.268(0.962,1.671)	0.910824
	cg03817794	11	BRSK2	1475775	rs4255564	11	1405725	C	T	0.295501	0.0694809	0.0410418	0.0904688	0.65097	0.0346126	6.5782e-79	0.106734	0.0633021	0.0917741	0.0591745	20	-0.0173381	0.230806	1.11264	0.982811	1.25961	1.113(0.983,1.26)	0.910824
	cg09619347	11	CCDC88B	64107520	rs7947143	11	64090422	A	G	0.159509	-0.0838149	0.0496376	0.0913086	-0.940424	0.0403969	7.13456e-120	0.0891246	0.0529209	0.0921603	0.116326	20	-0.0146004	0.19285	1.09322	0.985506	1.2127	1.093(0.986,1.213)	0.910824
	cg09790617	11	BRSK2	1466508	rs4255564	11	1405725	C	T	0.295501	0.0694809	0.0410418	0.0904688	0.553824	0.0357519	4.00468e-54	0.125457	0.0745475	0.0923926	0.093965	20	-0.0206561	0.27157	1.13367	0.979556	1.31202	1.134(0.98,1.312)	0.910824
	cg09450823	11	BRSK2	1431833	rs4255564	11	1405725	C	T	0.295501	0.0694809	0.0410418	0.0904688	0.549584	0.0367405	1.37014e-50	0.126425	0.0751547	0.0925318	0.127979	20	-0.0208782	0.273728	1.13476	0.979338	1.31486	1.135(0.979,1.315)	0.910824
	cg13880458	11	BRSK2	1474456	rs4255564	11	1405725	C	T	0.295501	0.0694809	0.0410418	0.0904688	0.503177	0.0357705	6.0744e-45	0.138084	0.082154	0.0928015	0.0696854	20	-0.0229378	0.299106	1.14807	0.977323	1.34865	1.148(0.977,1.349)	0.910824
	cg08782002	17	CCDC47	61847885	rs7213888	17	61581337	T	C	0.403885	0.0638136	0.036431	0.0798375	0.191789	0.0323938	3.20879e-09	0.332728	0.198092	0.0930234	0.00201597	20	-0.0555323	0.720988	1.39477	0.945981	2.05646	1.395(0.946,2.056)	0.910824
	cg19713911	11	BRSK2	1410081	rs4255564	11	1405725	C	T	0.295501	0.0694809	0.0410418	0.0904688	-0.473853	0.036026	1.63368e-39	-0.14663	0.0873275	0.0931367	0.221098	20	-0.317792	0.0245319	0.863613	0.727754	1.02484	0.864(0.728,1.025)	0.910824
	cg08654091	1	PSEN2	227015418	rs6426550	1	227028745	G	C	0.228016	0.0665748	0.0391481	0.0890202	0.366542	0.0351748	1.997e-25	0.181629	0.108217	0.0932718	0.389832	20	-0.0304763	0.393734	1.19917	0.969983	1.48251	1.199(0.97,1.483)	0.910824
	cg01713272	18	PTPN2	12911711	rs8089518	18	12898564	G	C	0.097137	0.101729	0.0605347	0.0928582	1.04886	0.0526916	3.63743e-88	0.0969902	0.05792	0.094022	0.959526	20	-0.016533	0.210513	1.10185	0.983603	1.23431	1.102(0.984,1.234)	0.910824
	cg26194090	6	SSR1	7269433	rs7763140	6	7269567	T	C	0.175869	0.0732165	0.0430348	0.0888806	0.357903	0.0385066	1.47787e-20	0.204571	0.122239	0.0942236	0.840352	20	-0.0350174	0.444159	1.227	0.965589	1.55918	1.227(0.966,1.559)	0.910824
	cg13633881	9	ADAMTS13	136297879	rs28647808	9	136305530	G	C	0.0817996	-0.114228	0.0682455	0.0941744	-2.18674	0.0308187	0	0.0522366	0.0312175	0.094266	0.646284	20	-0.0089497	0.113423	1.05363	0.99109	1.12011	1.054(0.991,1.12)	0.910824
	cg16762085	7	ESYT2	158551108	rs62480285	7	158588859	G	A	0.105317	-0.0926924	0.0551511	0.0928215	-0.852212	0.0506974	2.06944e-63	0.108767	0.0650379	0.0944534	0.980087	20	-0.0187073	0.236241	1.1149	0.981467	1.26648	1.115(0.981,1.266)	0.910824
	cg14467281	9	DNAJA1	33044611	rs20583	9	33026572	T	C	0.48773	0.0573695	0.0339835	0.0913808	0.393779	0.0322893	3.29069e-34	0.14569	0.0871238	0.0944823	0.431099	20	-0.0250726	0.316453	1.15684	0.975239	1.37225	1.157(0.975,1.372)	0.910824
	cg19494188	11	BRSK2	1466780	rs4255564	11	1405725	C	T	0.295501	0.0694809	0.0410418	0.0904688	0.374369	0.0364812	1.04556e-24	0.185595	0.111111	0.0948496	0.0819768	20	-0.0321826	0.403373	1.20393	0.96833	1.49686	1.204(0.968,1.497)	0.910824
	cg09461792	7	AGR3	17055230	rs35175691	7	17055372	T	G	0.235174	-0.0664243	0.0391253	0.089558	0.357609	0.0383138	1.02261e-20	-0.185746	0.111203	0.0948546	0.815305	20	-0.403704	0.0322119	0.830485	0.667842	1.03274	0.83(0.668,1.033)	0.910824
	cg13856295	9	NOTCH1	139396418	rs3124594	9	139396408	G	A	0.531697	-0.0760549	0.045416	0.0940069	0.659212	0.0310667	6.3389e-100	-0.115372	0.0691085	0.0950304	0.516266	20	-0.250825	0.0200807	0.891035	0.778159	1.02028	0.891(0.778,1.02)	0.910824
	cg13435792	12	ERP27	15092434	rs34356871	12	15089824	G	A	0.378323	-0.0602714	0.0360534	0.094578	-0.89168	0.0289226	1.04284e-208	0.0675931	0.0404925	0.0950628	0.747035	20	-0.0117722	0.146958	1.06993	0.988297	1.15831	1.07(0.988,1.158)	0.910824
	cg04574046	7	ESYT2	158551048	rs6459905	7	158589461	A	G	0.105317	-0.0926469	0.0552047	0.0932995	-0.697923	0.0508747	7.87105e-43	0.132747	0.0796882	0.0957483	0.834774	20	-0.0234419	0.288936	1.14196	0.976831	1.33501	1.142(0.977,1.335)	0.910824
	cg09963080	16	CREBBP	4017270	rs7202049	16	4043241	A	G	0.0787321	0.128019	0.0761121	0.0925739	-0.813544	0.0718064	9.35432e-30	-0.157359	0.0945816	0.0961644	0.4886	11	-0.342739	0.0280209	0.854397	0.709823	1.02842	0.854(0.71,1.028)	0.910824
	cg25630794	11	BRSK2	1471617	rs4255564	11	1405725	C	T	0.295501	0.0694809	0.0410418	0.0904688	0.324314	0.0360455	2.31208e-19	0.21424	0.12877	0.0961654	0.103159	19	-0.0381492	0.466629	1.23892	0.962569	1.59461	1.239(0.963,1.595)	0.910824
	cg18764804	1	PARP1	226596668	rs56033994	1	226545433	C	A	0.154397	-0.0786236	0.0460348	0.0876517	0.337355	0.0458384	1.84379e-13	-0.233059	0.140084	0.0961712	0.870991	7	-0.507624	0.0415056	0.792107	0.601924	1.04238	0.792(0.602,1.042)	0.910824
	cg07758738	18	PTPN2	12911528	rs8089518	18	12898564	G	C	0.097137	0.101729	0.0605347	0.0928582	0.645634	0.054784	4.65902e-32	0.157565	0.0947085	0.0961763	0.60638	19	-0.0280637	0.343194	1.17066	0.972326	1.40944	1.171(0.972,1.409)	0.910824
	cg03695103	11	BRSK2	1471594	rs4255564	11	1405725	C	T	0.295501	0.0694809	0.0410418	0.0904688	0.317767	0.0368158	6.06757e-18	0.218654	0.131618	0.096658	0.10508	15	-0.0393173	0.476625	1.2444	0.961446	1.61063	1.244(0.961,1.611)	0.910824
	cg16098170	19	JSRP1	2255848	rs10409081	19	2257514	T	C	0.161554	-0.0880202	0.0521927	0.0917096	-0.392579	0.0409566	9.22478e-22	0.22421	0.13499	0.0967263	0.585623	11	-0.0403704	0.48879	1.25133	0.960434	1.63034	1.251(0.96,1.63)	0.910824
	cg26367591	11	BRSK2	1412270	rs4255564	11	1405725	C	T	0.295501	0.0694809	0.0410418	0.0904688	-0.308851	0.0360156	9.86719e-18	-0.224966	0.13545	0.0967386	0.086996	18	-0.490448	0.040516	0.798543	0.612352	1.04135	0.799(0.612,1.041)	0.910824
	cg18247172	15	FURIN	91370233	rs404623	15	91367271	G	C	0.40593	-0.0616501	0.0358924	0.0858627	-0.214983	0.0333757	1.18455e-10	0.286768	0.172789	0.096986			-0.0518984	0.625434	1.33212	0.949425	1.86906	1.332(0.949,1.869)	0.910824
	cg14655837	2	NCK2	106357707	rs78160588	2	106353656	T	C	0.232106	0.070693	0.0408242	0.0833368	0.206128	0.0355706	6.83631e-09	0.342957	0.206706	0.0970851	0.889705	7	-0.0621868	0.748101	1.40911	0.939707	2.11298	1.409(0.94,2.113)	0.910824
	cg21272897	1	HSPG2	22191453	rs74229164	1	22188762	T	C	0.235174	0.0721283	0.0434582	0.0969717	1.25043	0.0291533	0	0.0576828	0.0347806	0.0972217	0.0130605	20	-0.0104872	0.125853	1.05938	0.989568	1.13412	1.059(0.99,1.134)	0.910824
	cg19846667	14	TRA	22191856	rs61972064	14	22273725	A	G	0.269939	-0.0689482	0.0401729	0.0861099	-0.238742	0.0374898	1.91273e-10	0.288798	0.174273	0.0974879	0.945465	18	-0.0527771	0.630373	1.33482	0.948591	1.87831	1.335(0.949,1.878)	0.910824
	cg26220203	1	CACNA1S	201100716	rs12025414	1	201100496	G	A	0.245399	0.0687181	0.0408519	0.092544	0.361825	0.038236	2.99369e-21	0.189921	0.114675	0.0976883	0.0793099	20	-0.034842	0.414684	1.20915	0.965758	1.51389	1.209(0.966,1.514)	0.910824
	cg15559938	1	MAPKAPK2	206837731	rs11119297	1	206851035	C	T	0.116564	-0.0981445	0.0572453	0.086445	-0.362117	0.0572136	2.46409e-10	0.27103	0.163782	0.0979613	0.0311024	6	-0.0499827	0.592043	1.31131	0.951246	1.80768	1.311(0.951,1.808)	0.910824
	cg03307360	1	PSEN2	227058426	rs7512804	1	227028287	G	C	0.200409	0.0679716	0.0405084	0.0933542	0.346827	0.0354287	1.25002e-22	0.195981	0.1185	0.0981591	0.754068	20	-0.036279	0.428241	1.2165	0.964371	1.53456	1.217(0.964,1.535)	0.910824
	cg19584649	7	ESYT2	158607898	rs62475608	7	158632467	C	T	0.141104	0.0807467	0.0488253	0.0981705	-1.57617	0.0297323	0	-0.0512297	0.0309923	0.0983341	0.703951	20	-0.111975	0.00951521	0.95006	0.894067	1.00956	0.95(0.894,1.01)	0.910824
	cg14288399	11	CCDC88B	64110785	rs2276014	11	64081445	A	G	0.158487	-0.0828584	0.0495406	0.0944187	0.443688	0.0418748	3.12344e-26	-0.186749	0.113039	0.0985182	0.366726	20	-0.408305	0.0348074	0.829652	0.664776	1.03542	0.83(0.665,1.035)	0.910824
	cg06937201	7	ESYT2	158551084	rs13233513	7	158590740	T	A	0.105317	-0.0935021	0.0563408	0.0969992	-0.820858	0.0512146	8.17035e-58	0.113908	0.0690035	0.0987889	0.994296	20	-0.0213389	0.249155	1.12065	0.978887	1.28294	1.121(0.979,1.283)	0.910824
	cg14306344	11	BRSK2	1427294	rs4255564	11	1405725	C	T	0.295501	0.0694809	0.0410418	0.0904688	0.263575	0.0358628	1.98907e-13	0.26361	0.15979	0.0989984	0.0996595	12	-0.0495784	0.576798	1.30162	0.951631	1.78033	1.302(0.952,1.78)	0.910824
	cg01606800	14	SERPINA1	94855990	rs8008743	14	94857010	G	C	0.498978	0.0596509	0.0354785	0.0926994	-0.277231	0.0325244	1.54434e-17	-0.215167	0.13044	0.0990364	0.113586	18	-0.470829	0.0404954	0.806407	0.624484	1.04133	0.806(0.624,1.041)	0.910824
	cg10336193	1	MAPKAPK2	206848389	rs35125368	1	206872631	A	G	0.168712	-0.0761163	0.0458327	0.0967652	0.540761	0.0381128	1.08015e-45	-0.140758	0.0853346	0.099049	0.253838	20	-0.308014	0.0264978	0.8687	0.734905	1.02685	0.869(0.735,1.027)	0.910824
	cg17565113	12	KRT5	52915036	rs596453	12	52916143	T	C	0.111452	0.0997241	0.0592513	0.0923617	-0.422981	0.0529301	1.33513e-15	-0.235765	0.143153	0.0995707	0.583736	6	-0.516345	0.0448149	0.789966	0.596698	1.04583	0.79(0.597,1.046)	0.910824
	cg07072475	14	CALM3	90850234	rs2300498	14	90865462	C	G	0.112474	-0.0886722	0.0537641	0.0990892	1.26671	0.0476196	6.67999e-156	-0.070002	0.0425254	0.0997382	0.105541	20	-0.153352	0.0133478	0.932392	0.857828	1.01344	0.932(0.858,1.013)	0.910824
	cg26407544	1	PINK1	20945355	rs12045107	1	20952194	T	C	0.197342	0.0699199	0.0422523	0.0979618	-0.606745	0.0392065	5.06692e-54	-0.115238	0.0700347	0.0998799	0.0440598	20	-0.252506	0.02203	0.891154	0.776852	1.02227	0.891(0.777,1.022)	0.910824
	cg01708924	11	PRDX5	64089278	rs2276014	11	64081445	A	G	0.158487	-0.0828584	0.0495406	0.0944187	0.38761	0.0427883	1.31915e-19	-0.213767	0.129971	0.100024	0.307903	20	-0.46851	0.0409762	0.807537	0.625934	1.04183	0.808(0.626,1.042)	0.910824
	cg17664577	20	MMP9	44642114	rs6017721	20	44616397	G	A	0.408998	-0.0612112	0.0368336	0.0965471	-0.381223	0.0339072	2.50338e-29	0.160565	0.0976694	0.100183	0.617848	20	-0.030867	0.351997	1.17417	0.969604	1.4219	1.174(0.97,1.422)	0.910824
	cg05194552	16	CREBBP	3873444	rs2530890	16	3904546	G	C	0.183027	0.0851496	0.0500876	0.089128	0.257378	0.0399361	1.15792e-10	0.330835	0.201264	0.10022	0.621529	13	-0.0636424	0.725312	1.39213	0.93834	2.06538	1.392(0.938,2.065)	0.910824
	cg15820961	6	HLA-DRB1	32558459	rs13206219	6	32577847	T	G	0.137014	0.121835	0.0741194	0.100223	-1.69962	0.0247306	0	-0.0716838	0.0436218	0.100321	0.111828	20	-0.157183	0.0138149	0.930825	0.854548	1.01391	0.931(0.855,1.014)	0.910824
	cg25591867	12	CKAP4	106641008	rs10861605	12	106825747	G	A	0.200409	-0.0729928	0.0427078	0.0874285	-0.232768	0.0390188	2.43831e-09	0.313586	0.19086	0.100379	0.814477	12	-0.0604996	0.687672	1.36832	0.941294	1.98908	1.368(0.941,1.989)	0.910824
	cg24018948	6	TAP2	32800412	rs41316552	6	32799923	C	T	0.160532	-0.0799151	0.0485884	0.100024	-0.982749	0.0427262	4.54548e-117	0.0813179	0.0495675	0.100891	0.418852	20	-0.0158344	0.17847	1.08472	0.98429	1.19539	1.085(0.984,1.195)	0.910824
	cg17170354	18	PTPN2	12911359	rs8089518	18	12898564	G	C	0.097137	0.101729	0.0605347	0.0928582	0.425482	0.0564746	4.91944e-14	0.239091	0.145769	0.100963	0.829042	10	-0.0466162	0.524798	1.27009	0.954454	1.69012	1.27(0.954,1.69)	0.910824
	cg07652408	11	BRSK2	1459488	rs4255564	11	1405725	C	T	0.295501	0.0694809	0.0410418	0.0904688	0.240823	0.0364009	3.69422e-11	0.288515	0.175914	0.100987	0.174577	6	-0.0562764	0.633306	1.33444	0.945278	1.88383	1.334(0.945,1.884)	0.910824
	cg02181506	14	SERPINA1	94856984	rs1570141	14	94856637	A	G	0.43865	-0.0594549	0.0356809	0.0956546	-0.300453	0.0329802	8.23111e-20	0.197884	0.120727	0.101192	0.146716	12	-0.0387409	0.434509	1.21882	0.962	1.5442	1.219(0.962,1.544)	0.910824
	cg21180572	9	DNAJA1	33043903	rs20583	9	33026572	T	C	0.48773	0.0573695	0.0339835	0.0913808	0.219495	0.0322888	1.06186e-11	0.26137	0.159528	0.10134	0.579176	12	-0.0513049	0.574045	1.29871	0.949989	1.77543	1.299(0.95,1.775)	0.910824
	cg11449372	19	JSRP1	2255658	rs10409081	19	2257514	T	C	0.161554	-0.0880202	0.0521927	0.0917096	-0.280498	0.0412196	1.01075e-11	0.3138	0.1917	0.101645	0.896578	9	-0.061932	0.689532	1.36862	0.939947	1.99278	1.369(0.94,1.993)	0.910824
	cg08835221	22	LGALS1	38071607	rs41280035	22	38054038	G	A	0.326176	0.0603446	0.0367053	0.10017	0.434232	0.0331988	4.29927e-39	0.138969	0.0851943	0.102849	0.987908	20	-0.0280118	0.30595	1.14909	0.972377	1.35791	1.149(0.972,1.358)	0.910824
	cg18297349	5	MZB1	138726375	rs3923060	5	138775301	C	T	0.296524	-0.0677306	0.0403992	0.0936343	0.247282	0.035939	5.95961e-12	-0.2739	0.168153	0.10334	0.545335	14	-0.60348	0.0556799	0.760408	0.546905	1.05726	0.76(0.547,1.057)	0.910824
	cg17253307	6	TAP2	32806417	rs2071466	6	32805307	T	C	0.278119	-0.06318	0.0376773	0.0935675	0.229805	0.0335533	7.43888e-12	-0.274929	0.168796	0.103363	0.762392	13	-0.605769	0.0559112	0.759626	0.545655	1.0575	0.76(0.546,1.058)	0.910824
	cg23207412	1	CPT2	53638985	rs3102042	1	53643674	A	G	0.298569	-0.066002	0.0397451	0.0967871	0.303926	0.0369407	1.91301e-16	-0.217165	0.13341	0.103566	0.851062	5	-0.478649	0.0443186	0.804797	0.61962	1.04532	0.805(0.62,1.045)	0.910824
	cg09516202	3	ADIPOQ	186544945	rs28448753	3	186545536	C	G	0.351738	-0.0649505	0.038715	0.0934138	0.230531	0.0346317	2.80159e-11	-0.281743	0.17319	0.103782	0.962393	3	-0.621195	0.0577094	0.754468	0.537302	1.05941	0.754(0.537,1.059)	0.910824
	cg16985288	1	PSEN2	227015456	rs12403248	1	227008386	A	G	0.199387	0.0677155	0.0401523	0.0917057	0.222052	0.0365722	1.26639e-09	0.304953	0.18767	0.104174	0.737791	20	-0.0628802	0.672786	1.35656	0.939056	1.95969	1.357(0.939,1.96)	0.910824
	cg15465743	11	BRSK2	1413145	rs7395567	11	1413056	T	C	0.290389	0.0669381	0.0411889	0.104131	-1.33525	0.0223709	0	-0.0501315	0.0308588	0.104259	0.0923633	20	-0.110615	0.0103517	0.951104	0.895284	1.01041	0.951(0.895,1.01)	0.910824
	cg17658113	11	BRSK2	1413282	rs7395567	11	1413056	T	C	0.290389	0.0669381	0.0411889	0.104131	-1.33166	0.0224503	0	-0.0502667	0.0309421	0.104261	0.0927844	20	-0.110913	0.0103798	0.950976	0.895016	1.01043	0.951(0.895,1.01)	0.910824
	cg12186219	11	BRSK2	1463541	rs7395567	11	1413056	T	C	0.290389	0.0669381	0.0411889	0.104131	1.2921	0.023983	0	0.0518057	0.031892	0.104289	0.0855824	20	-0.0107026	0.114314	1.05317	0.989354	1.1211	1.053(0.989,1.121)	0.910824
	cg07267067	12	SOAT2	53497074	rs2280698	12	53497288	G	A	0.0674847	0.111876	0.0683693	0.101766	-0.952373	0.0708558	3.47721e-41	-0.117471	0.0723184	0.1043	0.175959	20	-0.259215	0.0242731	0.889166	0.771657	1.02457	0.889(0.772,1.025)	0.910824
	cg12064373	11	BRSK2	1457153	rs7395567	11	1413056	T	C	0.290389	0.0669381	0.0411889	0.104131	1.26342	0.0249114	0	0.0529817	0.0326179	0.104309	0.0360912	20	-0.0109494	0.116913	1.05441	0.98911	1.12402	1.054(0.989,1.124)	0.910824
	cg25271479	11	BRSK2	1457346	rs7395567	11	1413056	T	C	0.290389	0.0669381	0.0411889	0.104131	1.2395	0.0254249	0	0.0540041	0.0332487	0.104323	0.0609398	20	-0.0111634	0.119172	1.05549	0.988899	1.12656	1.055(0.989,1.127)	0.910824
	cg11661000	11	BRSK2	1413315	rs7395567	11	1413056	T	C	0.290389	0.0669381	0.0411889	0.104131	-1.21515	0.0259115	0	-0.0550863	0.0339165	0.104339	0.0942511	20	-0.121563	0.01139	0.946403	0.885536	1.01146	0.946(0.886,1.011)	0.910824
	cg25007680	1	PARK7	8021821	rs226253	1	8027706	T	C	0.403885	0.0582033	0.0352326	0.09854	-0.271107	0.0304986	6.15641e-19	-0.214688	0.132183	0.104341	0.554722	20	-0.473767	0.0443907	0.806793	0.622653	1.04539	0.807(0.623,1.045)	0.910824
	cg17429870	11	BRSK2	1463662	rs7395567	11	1413056	T	C	0.290389	0.0669381	0.0411889	0.104131	1.20711	0.0266279	0	0.0554532	0.0341438	0.104354	0.0808149	20	-0.0114686	0.122375	1.05702	0.988597	1.13018	1.057(0.989,1.13)	0.910824
	cg10590925	11	BRSK2	1463620	rs7395567	11	1413056	T	C	0.290389	0.0669381	0.0411889	0.104131	1.19366	0.0270559	0	0.056078	0.0345298	0.104366	0.0866238	20	-0.0116004	0.123756	1.05768	0.988467	1.13174	1.058(0.988,1.132)	0.910824
	cg14064268	11	BRSK2	1463554	rs7395567	11	1413056	T	C	0.290389	0.0669381	0.0411889	0.104131	1.16507	0.0277877	0	0.0574541	0.0353797	0.104391	0.0807226	20	-0.0118901	0.126798	1.05914	0.98818	1.13519	1.059(0.988,1.135)	0.910824
	cg24603028	12	SOAT2	53497306	rs2280698	12	53497288	G	A	0.0674847	0.111876	0.0683693	0.101766	-0.941819	0.0714712	1.18072e-39	-0.118787	0.0731503	0.104402	0.664996	10	-0.262162	0.0245876	0.887997	0.769387	1.02489	0.888(0.769,1.025)	0.910824
	cg15803845	11	BRSK2	1474777	rs7395567	11	1413056	T	C	0.290389	0.0669381	0.0411889	0.104131	1.04536	0.0297968	1.22628e-269	0.0640335	0.0394439	0.104502	0.0829604	20	-0.0132765	0.141344	1.06613	0.986811	1.15182	1.066(0.987,1.152)	0.910824
	cg21665078	3	EIF2B5	183852786	rs111427065	3	183868861	A	G	0.132924	0.0803582	0.0475676	0.0911529	0.249441	0.0425191	4.44919e-09	0.322153	0.198446	0.104508	0.634601	9	-0.0668012	0.711107	1.3801	0.935381	2.03624	1.38(0.935,2.036)	0.910824
	cg17416644	11	BRSK2	1474841	rs7395567	11	1413056	T	C	0.290389	0.0669381	0.0411889	0.104131	0.995719	0.0304381	1.02327e-234	0.0672259	0.041417	0.104558	0.0981094	20	-0.0139514	0.148403	1.06954	0.986145	1.15998	1.07(0.986,1.16)	0.910824
	cg03553914	11	BRSK2	1475899	rs7395567	11	1413056	T	C	0.290389	0.0669381	0.0411889	0.104131	0.991051	0.0310011	3.01304e-224	0.0675425	0.0416145	0.104578	0.0647759	20	-0.0140219	0.149107	1.06988	0.986076	1.1608	1.07(0.986,1.161)	0.910824
	cg11307363	11	BRSK2	1474588	rs7395567	11	1413056	T	C	0.290389	0.0669381	0.0411889	0.104131	0.951456	0.0322506	2.71691e-191	0.0703533	0.043356	0.104656	0.053066	20	-0.0146245	0.155331	1.07289	0.985482	1.16804	1.073(0.985,1.168)	0.910824
	cg15416440	13	COL4A1	110899996	rs7319995	13	110896944	C	T	0.172802	-0.0743098	0.0454092	0.101746	-0.518655	0.0413747	4.77043e-36	0.143274	0.0882947	0.104658	0.214414	20	-0.0297836	0.316332	1.15405	0.970656	1.37209	1.154(0.971,1.372)	0.910824
	cg01660630	11	BRSK2	1432205	rs7395567	11	1413056	T	C	0.290389	0.0669381	0.0411889	0.104131	0.930569	0.032218	1.92365e-183	0.0719324	0.0443321	0.104679	0.0631239	20	-0.0149585	0.158823	1.07458	0.985153	1.17213	1.075(0.985,1.172)	0.910824
	cg21919719	11	BRSK2	1446802	rs7395567	11	1413056	T	C	0.290389	0.0669381	0.0411889	0.104131	0.924636	0.0324019	4.13444e-179	0.072394	0.0446183	0.104692	0.113147	20	-0.0150579	0.159846	1.07508	0.985055	1.17333	1.075(0.985,1.173)	0.910824
	cg26677995	11	BRSK2	1422907	rs7395567	11	1413056	T	C	0.290389	0.0669381	0.0411889	0.104131	0.867972	0.0331252	2.47103e-151	0.0771201	0.0475454	0.104797	0.113538	20	-0.0160689	0.170309	1.08017	0.98406	1.18567	1.08(0.984,1.186)	0.910824
	cg19613205	11	BRSK2	1458414	rs7395567	11	1413056	T	C	0.290389	0.0669381	0.0411889	0.104131	0.657946	0.0253895	4.6152e-148	0.101738	0.0627253	0.104812	0.0602768	20	-0.0212036	0.22468	1.10709	0.97902	1.25192	1.107(0.979,1.252)	0.910824
	cg06787104	11	BRSK2	1457119	rs7395567	11	1413056	T	C	0.290389	0.0669381	0.0411889	0.104131	0.852695	0.0330361	6.67205e-147	0.0785018	0.0484001	0.104817	0.0835527	20	-0.0163624	0.173366	1.08167	0.983771	1.1893	1.082(0.984,1.189)	0.910824
	cg06812836	11	BRSK2	1455362	rs7395567	11	1413056	T	C	0.290389	0.0669381	0.0411889	0.104131	0.849625	0.0335673	2.40985e-141	0.0787855	0.0485788	0.104844	0.0813827	20	-0.0164289	0.174	1.08197	0.983705	1.19006	1.082(0.984,1.19)	0.910824
	cg02030652	11	BRSK2	1412397	rs7395567	11	1413056	T	C	0.290389	0.0669381	0.0411889	0.104131	-0.826222	0.0333379	1.35947e-135	-0.0810171	0.0499592	0.104875	0.0689427	20	-0.178937	0.0169029	0.922178	0.836158	1.01705	0.922(0.836,1.017)	0.910824
	cg05404940	11	BRSK2	1446911	rs7395567	11	1413056	T	C	0.290389	0.0669381	0.0411889	0.104131	0.834659	0.0337144	2.62085e-135	0.0801981	0.0494544	0.104877	0.048844	20	-0.0167325	0.177129	1.0835	0.983407	1.19378	1.084(0.983,1.194)	0.910824
	cg13713155	4	LRPAP1	3522139	rs6789	4	3514695	G	A	0.277096	-0.0605538	0.0370615	0.102286	-0.452231	0.034118	4.22572e-40	0.1339	0.0825729	0.104889	0.92564	20	-0.0279429	0.295743	1.14328	0.972444	1.34412	1.143(0.972,1.344)	0.910824
	cg10026995	11	BRSK2	1475820	rs7395567	11	1413056	T	C	0.290389	0.0669381	0.0411889	0.104131	0.76751	0.0334286	1.18002e-116	0.0872146	0.0537999	0.104998	0.100862	20	-0.0182332	0.192662	1.09113	0.981932	1.21247	1.091(0.982,1.212)	0.910824
	cg10355759	11	BRSK2	1412345	rs7395567	11	1413056	T	C	0.290389	0.0669381	0.0411889	0.104131	-0.763332	0.0337163	1.75702e-113	-0.087692	0.0540982	0.105023	0.0824362	20	-0.193724	0.0183405	0.916043	0.823885	1.01851	0.916(0.824,1.019)	0.910824
	cg15411034	11	BRSK2	1466891	rs7395567	11	1413056	T	C	0.290389	0.0669381	0.0411889	0.104131	0.760535	0.0345569	2.40382e-107	0.0880145	0.0543053	0.105074	0.0823423	20	-0.0184239	0.194453	1.092	0.981745	1.21465	1.092(0.982,1.215)	0.910824
	cg27182106	3	RPN1	128417740	rs4557179	3	128366726	C	A	0.393661	0.0618288	0.036755	0.0925327	0.20851	0.0345529	1.59437e-09	0.296527	0.182995	0.105145	0.29288	19	-0.0621432	0.655197	1.34518	0.939748	1.92552	1.345(0.94,1.926)	0.910824
	cg14621221	11	BRSK2	1422804	rs7395567	11	1413056	T	C	0.290389	0.0669381	0.0411889	0.104131	0.671369	0.0350863	1.29543e-81	0.0997039	0.0615715	0.105379	0.0862165	20	-0.0209762	0.220384	1.10484	0.979242	1.24656	1.105(0.979,1.247)	0.910824
	cg12939085	11	PPP1CA	67166104	rs2286620	11	67166984	C	T	0.0766871	0.106734	0.0643697	0.0972889	0.524089	0.0698448	6.20765e-14	0.203656	0.125785	0.10543	0.250014	7	-0.0428826	0.450195	1.22588	0.958024	1.56862	1.226(0.958,1.569)	0.910824
	cg07067744	11	BRSK2	1421172	rs7395567	11	1413056	T	C	0.290389	0.0669381	0.0411889	0.104131	0.655649	0.0353757	1.10011e-76	0.102094	0.0630627	0.105461	0.0903847	20	-0.0215089	0.225697	1.10749	0.978721	1.2532	1.107(0.979,1.253)	0.910824
	cg18049328	11	BRSK2	1421209	rs7395567	11	1413056	T	C	0.290389	0.0669381	0.0411889	0.104131	0.647705	0.0355391	3.26032e-74	0.103347	0.0638444	0.105506	0.0633872	20	-0.021788	0.228482	1.10888	0.978448	1.25669	1.109(0.978,1.257)	0.910824
	cg17018661	11	BRSK2	1480166	rs7395567	11	1413056	T	C	0.290389	0.0669381	0.0411889	0.104131	0.59682	0.0354892	1.8337e-63	0.112158	0.0693355	0.105746	0.110921	20	-0.0237396	0.248056	1.11869	0.97654	1.28153	1.119(0.977,1.282)	0.910824
	cg04984852	11	BRSK2	1463935	rs7395567	11	1413056	T	C	0.290389	0.0669381	0.0411889	0.104131	0.564737	0.0358889	8.6121e-56	0.11853	0.0733226	0.105976	0.0735399	20	-0.0251823	0.262242	1.12584	0.975132	1.29984	1.126(0.975,1.3)	0.910824
	cg16414796	11	BRSK2	1413890	rs7395567	11	1413056	T	C	0.290389	0.0669381	0.0411889	0.104131	0.562902	0.0362171	1.79064e-54	0.118916	0.0735714	0.106022	0.0808581	20	-0.0252839	0.263116	1.12628	0.975033	1.30098	1.126(0.975,1.301)	0.910824
	cg00182727	20	MMP9	44640501	rs3761159	20	44634957	T	C	0.390593	-0.0580675	0.0355684	0.102561	-0.386698	0.0336592	1.50493e-30	0.150163	0.0929038	0.106024	0.767281	20	-0.0319284	0.332254	1.16202	0.968576	1.39411	1.162(0.969,1.394)	0.910824
	cg27662877	18	CYB5A	71959595	rs2042059	18	71907845	T	C	0.107362	0.0904565	0.0537917	0.0926447	0.261169	0.0456512	1.05921e-08	0.346352	0.214678	0.106667	0.73919	20	-0.0744169	0.767121	1.4139	0.928285	2.15356	1.414(0.928,2.154)	0.910824
	cg07220821	9	NOTCH1	139402658	rs3812603	9	139402908	T	C	0.42229	0.0769626	0.0473493	0.104073	-0.418432	0.0316314	6.01771e-40	-0.183931	0.11401	0.106682	0.36275	20	-0.407391	0.0395286	0.831993	0.665384	1.04032	0.832(0.665,1.04)	0.910824
	cg06592006	9	NOTCH1	139404917	rs7863729	9	139381236	C	T	0.143149	0.0856489	0.0523665	0.10193	-0.403983	0.0412715	1.26233e-22	-0.212011	0.131422	0.1067	0.979047	14	-0.469598	0.0455761	0.808956	0.625253	1.04663	0.809(0.625,1.047)	0.910824
	cg19014730	6	FKBP5	35635985	rs9394309	6	35621781	G	A	0.311861	0.062082	0.0376812	0.099443	0.279243	0.0352379	2.29047e-15	0.222323	0.137826	0.10673	0.226509	20	-0.047816	0.492462	1.24897	0.953309	1.63634	1.249(0.953,1.636)	0.910824
	cg18539086	11	BRSK2	1432030	rs7395567	11	1413056	T	C	0.290389	0.0669381	0.0411889	0.104131	0.457959	0.0359601	3.76877e-37	0.146166	0.0906696	0.106946	0.0588722	20	-0.0315464	0.323878	1.15739	0.968946	1.38248	1.157(0.969,1.382)	0.910824
	cg00298481	11	BDNF	27722063	rs11030107	11	27694835	G	A	0.234151	-0.0700046	0.041648	0.0927894	0.207925	0.0365703	1.30335e-08	-0.336682	0.208873	0.106984	0.0622183	5	-0.746073	0.0727091	0.714136	0.474225	1.07542	0.714(0.474,1.075)	0.910824
	cg09600088	11	BRSK2	1464485	rs7395567	11	1413056	T	C	0.290389	0.0669381	0.0411889	0.104131	0.457293	0.0362419	1.68462e-36	0.146379	0.0908152	0.106998	0.0976518	20	-0.0316188	0.324377	1.15763	0.968876	1.38317	1.158(0.969,1.383)	0.910824
	cg24152776	6	CNR1	89200366	rs9353559	6	89159292	C	G	0.364008	-0.0577834	0.0354824	0.103416	-0.351629	0.0321419	7.42838e-28	0.164331	0.10202	0.107231	0.651011	20	-0.0356282	0.36429	1.1786	0.964999	1.43949	1.179(0.965,1.439)	0.910824
	cg09461507	11	BRSK2	1460312	rs7395567	11	1413056	T	C	0.290389	0.0669381	0.0411889	0.104131	0.427807	0.0358656	8.45365e-33	0.156468	0.0971687	0.107339	0.0498386	20	-0.0339827	0.346919	1.16937	0.966588	1.4147	1.169(0.967,1.415)	0.910824
	cg03228449	2	FN1	216299545	rs1250243	2	216297656	C	T	0.253579	0.0667101	0.0408058	0.102086	-0.353226	0.0386318	6.052e-20	-0.18886	0.117355	0.107551	0.525918	17	-0.418876	0.0411558	0.827902	0.657786	1.04201	0.828(0.658,1.042)	0.910824
	cg09291824	11	BRSK2	1421113	rs7395567	11	1413056	T	C	0.290389	0.0669381	0.0411889	0.104131	0.420885	0.0364601	7.94212e-31	0.159041	0.0988277	0.107555	0.072944	20	-0.0346613	0.352743	1.17239	0.965933	1.42297	1.172(0.966,1.423)	0.910824
	cg14021073	11	BRSK2	1410385	rs7395567	11	1413056	T	C	0.290389	0.0669381	0.0411889	0.104131	-0.405869	0.0360654	2.22071e-29	-0.164925	0.102536	0.107734	0.130183	20	-0.365896	0.0360456	0.847957	0.693575	1.0367	0.848(0.694,1.037)	0.910824
	cg06183244	6	CNR1	89089654	rs9353559	6	89159292	C	G	0.364008	-0.0577834	0.0354824	0.103416	0.33247	0.0326465	2.33875e-24	-0.1738	0.108079	0.107817	0.804186	16	-0.385635	0.0380348	0.840465	0.680019	1.03877	0.84(0.68,1.039)	0.910824
	cg08012275	11	BRSK2	1464300	rs7395567	11	1413056	T	C	0.290389	0.0669381	0.0411889	0.104131	0.378019	0.0359111	6.51953e-26	0.177076	0.110251	0.108248	0.0564121	20	-0.039016	0.393168	1.19372	0.961735	1.48167	1.194(0.962,1.482)	0.910824
	cg07212747	16	HMOX2	4539233	rs4785969	16	4536934	T	A	0.292434	0.0666703	0.0403589	0.0985479	-0.250177	0.03705	1.45397e-11	-0.266492	0.166079	0.108579	0.459324	19	-0.592007	0.0590228	0.766062	0.553216	1.0608	0.766(0.553,1.061)	0.910824
	cg03440556	10	SCD	102107757	rs683854	10	102099093	C	A	0.43865	-0.0573618	0.035631	0.107424	0.603129	0.0316864	8.86523e-81	-0.095107	0.0592879	0.10868	0.386859	20	-0.211311	0.0210973	0.909276	0.809522	1.02132	0.909(0.81,1.021)	0.910824
	cg09197799	17	ERN1	62207616	rs3088093	17	62206438	A	G	0.145194	0.0918064	0.0547765	0.0937347	0.269355	0.048654	3.09229e-08	0.340838	0.212477	0.108688			-0.0756169	0.757293	1.40613	0.927171	2.1325	1.406(0.927,2.132)	0.910824
	cg00370047	11	BRSK2	1481436	rs7395567	11	1413056	T	C	0.290389	0.0669381	0.0411889	0.104131	0.361746	0.0364185	2.98993e-23	0.185042	0.115375	0.108753	0.102076	20	-0.041093	0.411177	1.20327	0.95974	1.50859	1.203(0.96,1.509)	0.910824
	cg16598679	14	CALM3	90851046	rs2300498	14	90865462	C	G	0.112474	-0.0886722	0.0537641	0.0990892	0.359266	0.0526665	9.00771e-12	-0.246815	0.153962	0.108914	0.035255	3	-0.548581	0.0549505	0.781285	0.577769	1.05649	0.781(0.578,1.056)	0.910824
	cg13379236	4	EGF	110833808	rs11568904	4	110865465	G	A	0.391616	-0.061844	0.0369738	0.0943974	-0.188013	0.0335395	2.07394e-08	0.328935	0.205223	0.108976	0.627659	11	-0.0733021	0.731172	1.38949	0.92932	2.07751	1.389(0.929,2.078)	0.910824
	cg05342945	12	COL2A1	48394962	rs3809324	12	48399028	T	G	0.225971	-0.0744137	0.0444429	0.0940588	-0.212184	0.0388037	4.54794e-08	0.350704	0.219054	0.109379	0.381495	3	-0.0786418	0.78005	1.42007	0.924371	2.18158	1.42(0.924,2.182)	0.910824
	cg12405684	11	BRSK2	1414627	rs7395567	11	1413056	T	C	0.290389	0.0669381	0.0411889	0.104131	0.328182	0.0358896	6.00687e-20	0.203966	0.127473	0.109582	0.0787048	13	-0.0458811	0.453813	1.22626	0.955156	1.5743	1.226(0.955,1.574)	0.910824
	cg10490888	11	BRSK2	1472610	rs7395567	11	1413056	T	C	0.290389	0.0669381	0.0411889	0.104131	0.324097	0.03631	4.42311e-19	0.206537	0.129178	0.109851	0.0583023	16	-0.0466519	0.459726	1.22941	0.95442	1.58364	1.229(0.954,1.584)	0.910824
	cg25753010	13	BRCA2	32889434	rs9534174	13	32893791	A	G	0.496933	0.0587992	0.0355854	0.0984656	-0.208977	0.0333975	3.91789e-10	-0.281367	0.176121	0.110137	0.312117	7	-0.626564	0.0638302	0.754751	0.534425	1.06591	0.755(0.534,1.066)	0.910824
	cg04875514	12	SOAT2	53497147	rs2280698	12	53497288	G	A	0.0674847	0.111876	0.0683693	0.101766	-0.521146	0.0718839	4.17284e-13	-0.214673	0.13449	0.110445	0.780392	4	-0.478273	0.0489274	0.806805	0.619853	1.05014	0.807(0.62,1.05)	0.910824
	cg08141873	11	HRAS	534632	rs12785860	11	531224	G	A	0.313906	-0.0645177	0.0401238	0.107842	0.432615	0.0340515	5.56535e-37	-0.149134	0.093487	0.110658	0.680441	20	-0.332369	0.0341005	0.861454	0.717223	1.03469	0.861(0.717,1.035)	0.910824
	cg06300961	11	BRSK2	1459507	rs7395567	11	1413056	T	C	0.290389	0.0669381	0.0411889	0.104131	0.299995	0.0360138	8.0845e-17	0.223131	0.139887	0.110695	0.0621635	15	-0.0510475	0.49731	1.24998	0.950234	1.64429	1.25(0.95,1.644)	0.910824
	cg23882724	8	SLC39A14	22223971	rs73670409	8	22226769	G	T	0.0807771	0.143922	0.0872169	0.0989102	0.477888	0.0770563	5.58205e-10	0.301162	0.188855	0.110785	0.215093	4	-0.0689938	0.671318	1.35143	0.933332	1.95681	1.351(0.933,1.957)	0.910824
	cg25560215	11	CSNK2A1	11426039	rs12283371	11	11639915	T	C	0.356851	0.057919	0.0351429	0.0993323	-0.209848	0.0334703	3.61792e-10	-0.276005	0.173158	0.110948	0.36362	4	-0.615395	0.0633847	0.758809	0.540428	1.06544	0.759(0.54,1.065)	0.910824
	cg10490202	17	RPTOR	78867631	rs12937510	17	78854496	T	C	0.242331	0.0640713	0.0399833	0.109056	-0.541829	0.0357525	7.02019e-52	-0.11825	0.0742047	0.111033	0.820996	20	-0.263691	0.0271912	0.888474	0.768211	1.02756	0.888(0.768,1.028)	0.910824
	cg14089881	1	ICMT	6296630	rs4908868	1	6287543	G	C	0.0899796	0.109829	0.0684048	0.108369	0.77238	0.0597	2.75813e-38	0.142195	0.089243	0.111082	0.925253	6	-0.0327213	0.317111	1.1528	0.967808	1.37316	1.153(0.968,1.373)	0.910824
	cg00565882	2	CYP1B1	38300707	rs73930005	2	38346917	G	C	0.148262	-0.0759364	0.0473031	0.108424	0.61654	0.0475095	1.64798e-38	-0.123165	0.0773082	0.111121	0.21318	20	-0.274689	0.0283591	0.884118	0.759808	1.02877	0.884(0.76,1.029)	0.910824
	cg16793525	11	BRSK2	1422319	rs7395567	11	1413056	T	C	0.290389	0.0669381	0.0411889	0.104131	0.296351	0.036814	8.28284e-16	0.225874	0.141791	0.111158	0.0786465	9	-0.0520364	0.503784	1.25342	0.949294	1.65497	1.253(0.949,1.655)	0.910824
	cg02596281	2	IL1B	113595614	rs6735739	2	113609886	T	C	0.355828	0.0582417	0.0363409	0.109013	-0.46339	0.0330538	1.18857e-44	-0.125686	0.0789349	0.111323	0.0354827	20	-0.280398	0.0290264	0.881892	0.755483	1.02945	0.882(0.755,1.029)	0.910824
	cg16744911	10	SCD	102108974	rs683854	10	102099093	C	A	0.43865	-0.0573618	0.035631	0.107424	0.347272	0.0330229	7.28393e-26	-0.165178	0.103798	0.111532	0.698705	20	-0.368622	0.0382661	0.847743	0.691687	1.03901	0.848(0.692,1.039)	0.910824
	cg09167291	11	BRSK2	1468535	rs7395567	11	1413056	T	C	0.290389	0.0669381	0.0411889	0.104131	0.279881	0.0364141	1.51745e-14	0.239166	0.15042	0.111836	0.109561	20	-0.0556572	0.533989	1.27019	0.945863	1.70572	1.27(0.946,1.706)	0.910824
	cg17724175	1	MCL1	150552817	rs6587756	1	150546865	A	T	0.347648	-0.0577897	0.0362796	0.111183	0.752283	0.0312126	2.38935e-128	-0.0768191	0.0483312	0.111963	0.623869	20	-0.171548	0.0179101	0.926057	0.84236	1.01807	0.926(0.842,1.018)	0.910824
	cg14741143	3	SSR3	156273315	rs7638642	3	156278306	C	T	0.460123	0.0571446	0.0356417	0.108867	0.385979	0.0324528	1.27846e-32	0.148051	0.0931763	0.112075	0.184473	20	-0.0345745	0.330677	1.15957	0.966016	1.39191	1.16(0.966,1.392)	0.910824
	cg06264984	2	CYP1B1	38300885	rs73930005	2	38346917	G	C	0.148262	-0.0759364	0.0473031	0.108424	0.529511	0.0476371	1.05451e-28	-0.143409	0.0902603	0.112098	0.184944	20	-0.320319	0.0335012	0.8664	0.725917	1.03407	0.866(0.726,1.034)	0.910824
	cg25257677	8	SLC39A14	22223985	rs73670409	8	22226769	G	T	0.0807771	0.143922	0.0872169	0.0989102	0.449605	0.0770525	5.37748e-09	0.320107	0.201593	0.112312			-0.0750153	0.715229	1.37728	0.927729	2.04466	1.377(0.928,2.045)	0.910824
	cg03735511	8	CLU	27461800	rs9331888	8	27468862	G	C	0.300613	-0.0639958	0.0399086	0.108812	0.400024	0.0359251	8.48037e-29	-0.15998	0.100795	0.112471	0.873296	14	-0.357538	0.0375782	0.852161	0.699396	1.03829	0.852(0.699,1.038)	0.910824
	cg23372535	11	BRSK2	1446386	rs7395567	11	1413056	T	C	0.290389	0.0669381	0.0411889	0.104131	0.260852	0.036171	5.52845e-13	0.256613	0.161861	0.112878	0.15897	20	-0.0606346	0.573861	1.29254	0.941167	1.77511	1.293(0.941,1.775)	0.910824
	cg27238079	10	ITGB1	33247273	rs10827084	10	32911166	G	A	0.0552147	-0.166366	0.103781	0.108924	0.772752	0.0731021	4.06767e-26	-0.21529	0.135836	0.112982	0.253737	20	-0.481529	0.0509486	0.806308	0.617838	1.05227	0.806(0.618,1.052)	0.910824
	cg14929208	3	SSR3	156273297	rs7638642	3	156278306	C	T	0.460123	0.0571446	0.0356417	0.108867	0.341612	0.0328187	2.25435e-25	0.167279	0.105564	0.113053	0.21901	20	-0.0396264	0.374184	1.18208	0.961148	1.45381	1.182(0.961,1.454)	0.910824
	cg04662369	17	RPTOR	78754318	rs9915667	17	78754340	A	G	0.440695	-0.0566125	0.0356858	0.112645	0.888389	0.0273505	1.93752e-231	-0.0637249	0.040217	0.113074	0.963101	20	-0.14255	0.0151004	0.938263	0.867144	1.01522	0.938(0.867,1.015)	0.910824
	cg14780427	17	RPTOR	78754372	rs9915667	17	78754340	A	G	0.440695	-0.0566125	0.0356858	0.112645	0.852757	0.0278206	2.48555e-206	-0.0663876	0.0419036	0.113127	0.916351	20	-0.148519	0.0157435	0.935768	0.861984	1.01587	0.936(0.862,1.016)	0.910824
	cg25554036	4	WFS1	6271136	rs13107806	4	6271071	T	C	0.395706	-0.0553775	0.0349363	0.112944	-1.05992	0.0252002	0	0.0522468	0.0329847	0.1132	0.349621	20	-0.0124032	0.116897	1.05364	0.987673	1.124	1.054(0.988,1.124)	0.910824
	cg14416269	4	WFS1	6271139	rs13107806	4	6271071	T	C	0.395706	-0.0553775	0.0349363	0.112944	-1.00643	0.0267835	0	0.0550237	0.034744	0.113264	0.320223	20	-0.0130745	0.123122	1.05657	0.987011	1.13102	1.057(0.987,1.131)	0.910824
	cg14479303	9	NOTCH1	139402887	rs3124598	9	139403554	T	C	0.421268	0.0758476	0.047566	0.110808	-0.414647	0.0313872	7.6107e-40	-0.182921	0.115547	0.113403	0.56873	20	-0.409393	0.0435511	0.832834	0.664053	1.04451	0.833(0.664,1.045)	0.910824
	cg26764761	16	JPH3	87682142	rs748554	16	87682775	G	T	0.498978	-0.0547922	0.0346102	0.113394	1.24114	0.0172284	0	-0.0441467	0.0278926	0.113481	0.546802	20	-0.0988162	0.0105228	0.956814	0.905909	1.01058	0.957(0.906,1.011)	0.910824
	cg03834411	16	JPH3	87682036	rs748554	16	87682775	G	T	0.498978	-0.0547922	0.0346102	0.113394	1.18303	0.0197292	0	-0.0463151	0.0292658	0.11352	0.519153	20	-0.103676	0.0110459	0.954741	0.901517	1.01111	0.955(0.902,1.011)	0.910824
	cg03885646	3	SSR3	156273458	rs7638642	3	156278306	C	T	0.460123	0.0571446	0.0356417	0.108867	0.318156	0.0327515	2.62198e-22	0.179612	0.113541	0.113671	0.247137	20	-0.0429284	0.402152	1.19675	0.95798	1.49504	1.197(0.958,1.495)	0.910824
	cg21369886	7	CD36	80305251	rs13226433	7	80308171	A	C	0.439673	-0.0569392	0.0359523	0.113252	-0.798547	0.0294062	2.16628e-162	0.0713035	0.0450987	0.113865	0.97705	20	-0.01709	0.159697	1.07391	0.983055	1.17316	1.074(0.983,1.173)	0.910824
	cg02393097	8	CLU	27473422	rs9314349	8	27474202	G	A	0.387526	-0.0585719	0.0355972	0.0998857	0.192418	0.0338295	1.28629e-08	-0.304399	0.192585	0.11397			-0.681866	0.0730676	0.737567	0.505673	1.0758	0.738(0.506,1.076)	0.910824
	cg17818435	12	SOAT2	53497138	rs2280698	12	53497288	G	A	0.0674847	0.111876	0.0683693	0.101766	-0.432883	0.0719695	1.80093e-09	-0.258444	0.16368	0.114345			-0.579257	0.0623688	0.772252	0.560315	1.06435	0.772(0.56,1.064)	0.910824
	cg26378201	17	GH1	61996501	rs3020619	17	61993137	G	A	0.260736	0.0646133	0.0401885	0.107888	-0.316206	0.0379038	7.28404e-17	-0.204339	0.129435	0.114403	0.738093	20	-0.458032	0.0493536	0.815186	0.632527	1.05059	0.815(0.633,1.051)	0.910824
	cg02183170	14	LGALS3	55595698	rs17253695	14	55574610	T	A	0.328221	0.0624695	0.0392429	0.111414	-0.409938	0.0335842	2.87705e-34	-0.152388	0.0965395	0.11445	0.724529	20	-0.341605	0.0368294	0.858655	0.710629	1.03752	0.859(0.711,1.038)	0.910824
	cg24084836	14	POMT2	77767735	rs2363642	14	77785621	T	C	0.294479	-0.0613764	0.0382102	0.108212	-0.29252	0.0356723	2.40003e-16	0.209819	0.133107	0.114951	0.23347	19	-0.0510707	0.470709	1.23345	0.950211	1.60113	1.233(0.95,1.601)	0.910824
	cg21737444	22	LGALS1	38071591	rs62236671	22	38069305	A	G	0.335378	0.0577899	0.0365862	0.114209	0.738472	0.0307571	2.19743e-127	0.078256	0.0496503	0.114992	0.599985	20	-0.0190586	0.175571	1.0814	0.981122	1.19193	1.081(0.981,1.192)	0.910824
	cg27071793	6	HLA-C	31275718	rs2596474	6	31326223	G	A	0.361963	0.0682866	0.0432023	0.113964	0.624421	0.0317155	2.72076e-86	0.10936	0.0694103	0.115128	0.138925	20	-0.0266842	0.245404	1.11556	0.973669	1.27814	1.116(0.974,1.278)	0.910824
	cg05443795	16	JPH3	87682572	rs748554	16	87682775	G	T	0.498978	-0.0547922	0.0346102	0.113394	0.483215	0.0309688	6.9124e-55	-0.113391	0.0719927	0.115249	0.725614	20	-0.254497	0.0277147	0.892802	0.775307	1.0281	0.893(0.775,1.028)	0.910824
	cg11772193	11	BRSK2	1471691	rs7395567	11	1413056	T	C	0.290389	0.0669381	0.0411889	0.104131	0.232809	0.0365933	1.99055e-10	0.287524	0.182602	0.115352	0.100611	9	-0.0703759	0.645424	1.33312	0.932043	1.9068	1.333(0.932,1.907)	0.910824
	cg01264106	22	LGALS1	38071602	rs62236671	22	38069305	A	G	0.335378	0.0577899	0.0365862	0.114209	0.628127	0.0321703	6.7225e-85	0.0920035	0.0584368	0.115393	0.919691	20	-0.0225326	0.20654	1.09637	0.977719	1.22942	1.096(0.978,1.229)	0.910824
	cg00383763	1	SYT2	202682124	rs4561090	1	202685803	G	A	0.314928	0.0619045	0.0389004	0.111529	-0.369424	0.0353362	1.39646e-25	-0.16757	0.106513	0.115664	0.279606	20	-0.376335	0.0411955	0.845717	0.686372	1.04206	0.846(0.686,1.042)	0.910824
	cg15836722	2	IL1B	113593785	rs6735739	2	113609886	T	C	0.355828	0.0582417	0.0363409	0.109013	-0.274154	0.0337397	4.45257e-16	-0.212442	0.13511	0.115868	0.317311	13	-0.477258	0.0523736	0.808607	0.620483	1.05377	0.809(0.62,1.054)	0.910824
	cg25671118	18	PIK3C3	39584467	rs4447506	18	39510074	G	A	0.365031	-0.0604485	0.0374457	0.106463	-0.227406	0.033126	6.65471e-12	0.265818	0.169156	0.116082	0.311059	20	-0.0657278	0.597364	1.3045	0.936386	1.81732	1.304(0.936,1.817)	0.910824
	cg12989344	11	HRAS	534232	rs12628	11	534242	G	A	0.312883	-0.0638574	0.0401795	0.111992	0.322477	0.0350073	3.21011e-20	-0.198022	0.126437	0.11731	0.173574	20	-0.445839	0.0497945	0.820352	0.640287	1.05106	0.82(0.64,1.051)	0.910824
	cg27619353	22	LGALS1	38071651	rs62236671	22	38069305	A	G	0.335378	0.0577899	0.0365862	0.114209	0.377272	0.0331941	6.20146e-30	0.153178	0.0979078	0.117696	0.99347	20	-0.0387213	0.345077	1.16553	0.962019	1.4121	1.166(0.962,1.412)	0.910824
	cg18703951	6	CNR1	88856120	rs1870832	6	89157027	G	A	0.364008	-0.0575667	0.0354673	0.10457	0.186263	0.0324407	9.37635e-09	-0.309062	0.197877	0.118315	0.931777	3	-0.696901	0.0787769	0.734135	0.498127	1.08196	0.734(0.498,1.082)	0.910824
	cg08203127	16	PDIA2	331727	rs369440	16	330925	G	A	0.097137	0.100322	0.0628466	0.110423	-0.442907	0.0587785	4.87623e-14	-0.226507	0.145045	0.118373	0.0460639	20	-0.510795	0.0577812	0.797314	0.600018	1.05948	0.797(0.6,1.059)	0.910824
	cg09417849	16	PDIA2	331892	rs369440	16	330925	G	A	0.097137	0.100322	0.0628466	0.110423	-0.44075	0.059307	1.07236e-13	-0.227616	0.145842	0.118595	0.0264946	20	-0.513466	0.0582343	0.79643	0.598418	1.05996	0.796(0.598,1.06)	0.910824
	cg18016565	1	MCL1	150552671	rs6587756	1	150546865	A	T	0.347648	-0.0577897	0.0362796	0.111183	0.259744	0.0336323	1.13577e-14	-0.222487	0.142614	0.118745	0.560032	20	-0.50201	0.0570364	0.800525	0.605312	1.05869	0.801(0.605,1.059)	0.910824
	cg26132320	20	MMP9	44640353	rs3761158	20	44634912	A	G	0.417178	-0.0558799	0.0355639	0.116124	-0.420323	0.0332413	1.19857e-36	0.132945	0.0852616	0.118935	0.523076	20	-0.0341677	0.300058	1.14219	0.966409	1.34994	1.142(0.966,1.35)	0.910824
	cg12644059	15	FURIN	91361926	rs2239291	15	91357926	A	G	0.331288	-0.0580591	0.0363122	0.109845	0.238281	0.0342234	3.34254e-12	-0.243658	0.156359	0.119155	0.467844	20	-0.550122	0.0628056	0.783756	0.57688	1.06482	0.784(0.577,1.065)	0.910824
	cg18065728	5	CD74	149781668	rs11742769	5	149771286	T	C	0.117587	0.0974085	0.0600942	0.105033	0.264687	0.0482447	4.10328e-08	0.368014	0.23674	0.120064			-0.0959964	0.832024	1.44486	0.908467	2.29797	1.445(0.908,2.298)	0.910824
	cg06850651	11	KCNQ1OT1	2785580	rs4430486	11	2785391	G	C	0.154397	-0.0746074	0.0478831	0.119206	-0.787923	0.0414764	1.8098e-80	0.0946887	0.0609754	0.120447	0.718915	20	-0.0248231	0.2142	1.09932	0.975482	1.23887	1.099(0.975,1.239)	0.910824
	cg05351887	16	CREBBP	3988869	rs7199418	16	3994927	C	G	0.0899796	-0.0915723	0.0581723	0.115451	0.493066	0.0559715	1.25998e-18	-0.18572	0.11985	0.121235	0.617362	17	-0.420626	0.049186	0.830506	0.656636	1.05042	0.831(0.657,1.05)	0.910824
	cg08851727	1	ICMT	6296770	rs12067847	1	6268708	C	G	0.0828221	0.129366	0.0817604	0.113591	0.462409	0.0608503	2.98137e-14	0.279765	0.180606	0.121374	0.927	4	-0.0742228	0.633753	1.32282	0.928465	1.88467	1.323(0.928,1.885)	0.910824
	cg16035382	7	KDELR2	6523282	rs62456201	7	6079839	A	G	0.276074	-0.0632973	0.0396366	0.110279	0.22452	0.0357377	3.33294e-10	-0.281923	0.182154	0.121689	0.388805	5	-0.638945	0.0750988	0.754332	0.527849	1.07799	0.754(0.528,1.078)	0.910824
	cg15617853	13	HTR2A	47669359	rs1431768	13	47669350	A	G	0.344581	0.0556193	0.0358095	0.120376	-0.584056	0.0332269	3.64327e-69	-0.0952293	0.0615507	0.121822	0.585862	20	-0.215869	0.0254101	0.909164	0.805841	1.02574	0.909(0.806,1.026)	0.910824
	cg14228332	4	SEC24D	119757509	rs56042726	4	119751777	A	T	0.0552147	-0.099023	0.06344	0.118549	0.70361	0.0636914	2.26223e-28	-0.140736	0.0910591	0.122215	0.986144	20	-0.319212	0.0377398	0.868719	0.726722	1.03846	0.869(0.727,1.038)	0.910824
	cg08161617	14	HSPA2	65006777	rs4313734	14	65005228	C	T	0.311861	-0.0584238	0.0370383	0.114706	0.269415	0.0351529	1.80091e-14	-0.216854	0.140358	0.122345	0.412347	14	-0.491956	0.0582477	0.805047	0.611429	1.05998	0.805(0.611,1.06)	0.910824
	cg16321523	8	ZFAND1	82633764	rs72603870	8	82651292	G	C	0.125767	0.0861694	0.0539353	0.110122	0.316374	0.0525181	1.70056e-09	0.272366	0.176373	0.122526	0.487068	8	-0.0733251	0.618057	1.31307	0.929299	1.85532	1.313(0.929,1.855)	0.910824
	cg14284257	7	PON2	95060347	rs4729189	7	95057959	T	A	0.213701	-0.067743	0.043741	0.121446	-0.666072	0.0364081	9.1311e-75	0.101705	0.065905	0.122779	0.140883	20	-0.0274688	0.230879	1.10706	0.972905	1.25971	1.107(0.973,1.26)	0.910824
	cg00673290	2	APOB	21266727	rs1367117	2	21263900	A	G	0.298569	0.0590184	0.0380508	0.120892	0.505678	0.0329626	4.07034e-53	0.116711	0.0756308	0.122789	0.396985	20	-0.0315254	0.264947	1.12379	0.968966	1.30336	1.124(0.969,1.303)	0.910824
	cg00142150	22	LGALS1	38071001	rs62236671	22	38069305	A	G	0.335378	0.0577899	0.0365862	0.114209	0.240547	0.0334447	6.36679e-13	0.240244	0.155721	0.122883	0.874696	18	-0.0649692	0.545457	1.27156	0.937096	1.7254	1.272(0.937,1.725)	0.910824
	cg26963277	11	KCNQ1OT1	2722407	rs231350	11	2713649	A	C	0.341513	-0.0565144	0.0362673	0.119168	-0.357763	0.0330724	2.8417e-27	0.157966	0.102419	0.122987	0.993762	20	-0.0427752	0.358707	1.17113	0.958127	1.43148	1.171(0.958,1.431)	0.910824
	cg19381766	7	ACTB	5597647	rs852531	7	5597677	A	G	0.337423	-0.0630838	0.0406668	0.120845	-0.490871	0.0350239	1.25656e-44	0.128514	0.0833521	0.123117	0.958609	20	-0.0348561	0.291884	1.13714	0.965744	1.33895	1.137(0.966,1.339)	0.910824
	cg14606382	20	PRNP	4573199	rs6076703	20	4571478	C	A	0.310838	-0.0574019	0.0368594	0.119395	0.369192	0.0345084	1.03303e-26	-0.15548	0.10089	0.123298	0.980493	20	-0.353224	0.0422644	0.856004	0.70242	1.04317	0.856(0.702,1.043)	0.910824
	cg13996963	8	TUSC3	15398278	rs1429087	8	15400574	C	A	0.349693	-0.0600162	0.0374837	0.109349	-0.186268	0.0330874	1.80653e-08	0.322203	0.209216	0.123548	0.147104	20	-0.0878604	0.732266	1.38016	0.915889	2.07979	1.38(0.916,2.08)	0.910824
	cg21806090	12	CACNA1C	2198034	rs2239028	12	2332210	T	C	0.0817996	-0.109126	0.0699229	0.118603	-0.543694	0.0586625	1.89364e-20	0.200713	0.130418	0.123804	0.00750483	8	-0.0549063	0.456332	1.22227	0.946574	1.57827	1.222(0.947,1.578)	0.910824
	cg01400712	2	POMC	25352206	rs2099598	2	25347046	C	T	0.228016	-0.066167	0.0426804	0.121072	-0.489676	0.0393552	1.5367e-35	0.135124	0.0878344	0.123952	0.666046	20	-0.0370314	0.307279	1.14468	0.963646	1.35972	1.145(0.964,1.36)	0.910824
	cg02712222	6	SSR1	7314903	rs113316204	6	7316956	C	T	0.161554	0.06705	0.0433112	0.121599	-0.529204	0.0406749	1.06531e-38	-0.1267	0.0824195	0.124231	0.415464	20	-0.288242	0.0348422	0.880998	0.74958	1.03546	0.881(0.75,1.035)	0.910824
	cg17661940	11	PPP1CA	67168617	rs646834	11	66932753	C	A	0.0746421	0.100832	0.0634303	0.111915	0.324142	0.0538996	1.81216e-09	0.311072	0.202408	0.124328	0.269625	7	-0.0856477	0.707792	1.36489	0.917918	2.0295	1.365(0.918,2.03)	0.910824
	cg26112457	2	APOB	21267334	rs1367117	2	21263900	A	G	0.298569	0.0590184	0.0380508	0.120892	0.365592	0.0332751	4.41573e-28	0.161432	0.105112	0.124584	0.268627	20	-0.0445875	0.367452	1.17519	0.956392	1.44405	1.175(0.956,1.444)	0.910824
	cg26330577	6	MICB	31474279	rs2242955	6	31474280	A	G	0.108384	0.0848616	0.0550488	0.123178	-0.826657	0.0512037	1.24173e-58	-0.102656	0.066895	0.124885	0.522789	20	-0.23377	0.0284582	0.902437	0.791544	1.02887	0.902(0.792,1.029)	0.910824
	cg21226938	9	SEC16A	139384074	rs10870070	9	139374952	A	C	0.143149	0.0804396	0.0515768	0.118852	0.361077	0.042007	8.27976e-18	0.222777	0.145174	0.124894	0.840925	10	-0.061764	0.507318	1.24954	0.940105	1.66083	1.25(0.94,1.661)	0.910824
	cg20293942	13	DLEU2	50701256	rs9316484	13	50645164	C	T	0.212679	-0.0666655	0.0434665	0.125098	1.45552	0.0246916	0	-0.0458018	0.0298733	0.125226	0.529379	20	-0.104353	0.0127499	0.955231	0.900907	1.01283	0.955(0.901,1.013)	0.910824
	cg23104954	13	DLEU2	50701501	rs9316484	13	50645164	C	T	0.212679	-0.0666655	0.0434665	0.125098	1.25356	0.0309534	0	-0.0531809	0.0346993	0.125369	0.60739	20	-0.121192	0.0148297	0.948208	0.885864	1.01494	0.948(0.886,1.015)	0.910824
	cg01404873	13	DLEU2	50701050	rs9316484	13	50645164	C	T	0.212679	-0.0666655	0.0434665	0.125098	1.14373	0.0333415	6.95977e-258	-0.0582878	0.0380421	0.125475	0.595192	20	-0.13285	0.0162747	0.943378	0.875596	1.01641	0.943(0.876,1.016)	0.910824
	cg06414921	6	HLA-C	31276504	rs2395475	6	31326920	G	A	0.297546	-0.0600071	0.0387983	0.121949	-0.363578	0.0325132	4.96809e-29	0.165046	0.107728	0.125507	0.12498	20	-0.0461009	0.376193	1.17945	0.954946	1.45673	1.179(0.955,1.457)	0.910824
	cg00822361	3	SSR3	156271246	rs9874927	3	156274344	G	A	0.456033	0.0561088	0.0352083	0.11102	0.181405	0.0326845	2.85357e-08	0.309301	0.201929	0.125588	0.422625	5	-0.0864798	0.705082	1.36247	0.917154	2.02401	1.362(0.917,2.024)	0.910824
	cg00465247	13	DLEU2	50703477	rs9316484	13	50645164	C	T	0.212679	-0.0666655	0.0434665	0.125098	-1.03017	0.0345942	7.3758e-195	0.0647131	0.0422494	0.125599	0.593952	20	-0.0180957	0.147522	1.06685	0.982067	1.15896	1.067(0.982,1.159)	0.910824
	cg18328965	10	SCD	102107584	rs11190478	10	102102132	C	G	0.412065	-0.0541183	0.0350889	0.122996	0.429528	0.0331027	1.68235e-38	-0.125995	0.0822669	0.125637	0.353163	20	-0.287238	0.0352481	0.881619	0.750333	1.03588	0.882(0.75,1.036)	0.910824
	cg09000832	13	DLEU2	50703589	rs9316484	13	50645164	C	T	0.212679	-0.0666655	0.0434665	0.125098	-0.754733	0.0375567	8.02888e-90	0.0883299	0.0577594	0.126197	0.588437	20	-0.0248785	0.201538	1.09235	0.975428	1.22328	1.092(0.975,1.223)	0.910824
	cg02284802	17	RPTOR	78818578	rs2589151	17	78822959	G	A	0.159509	0.0731738	0.0473252	0.122058	0.414149	0.0403948	1.15277e-24	0.176685	0.115563	0.126289	0.0850764	13	-0.0498185	0.403188	1.19326	0.951402	1.49659	1.193(0.951,1.497)	0.910824
	cg13204699	13	DLEU2	50703841	rs9316484	13	50645164	C	T	0.212679	-0.0666655	0.0434665	0.125098	-0.730379	0.0382097	1.89317e-81	0.0912752	0.0597035	0.126312	0.623489	20	-0.0257437	0.208294	1.09557	0.974585	1.23158	1.096(0.975,1.232)	0.910824
	cg26312149	1	TOR1AIP2	179847685	rs17279594	1	179849356	T	A	0.195297	-0.0684191	0.0445659	0.124726	-0.641834	0.0393229	6.86834e-60	0.106599	0.0697417	0.126391	0.667536	20	-0.0300947	0.243293	1.11249	0.970354	1.27544	1.112(0.97,1.275)	0.910824
	cg00385883	3	OXTR	8808259	rs3806675	3	8811646	A	G	0.420245	-0.0628883	0.0405052	0.120519	-0.275546	0.0317557	4.06128e-18	0.228232	0.149334	0.126431	0.103781	19	-0.0644626	0.520927	1.25638	0.937571	1.68359	1.256(0.938,1.684)	0.910824
	cg10322879	2	YWHAQ	9753939	rs17362839	2	9754439	C	T	0.176892	-0.0656378	0.0427967	0.125101	-0.537394	0.0399149	2.56447e-41	0.122141	0.0801525	0.127545	0.110638	20	-0.0349579	0.27924	1.12991	0.965646	1.32212	1.13(0.966,1.322)	0.910824
	cg11774850	2	LPIN1	11881338	rs10191977	2	11881039	G	A	0.420245	0.0542508	0.0345654	0.116528	0.200591	0.0319075	3.24396e-10	0.270455	0.177607	0.127815	0.3481	3	-0.0776547	0.618565	1.31056	0.925284	1.85626	1.311(0.925,1.856)	0.910824
	cg27652893	4	TLR3	187026970	rs6552954	4	187024308	A	T	0.474438	-0.0542096	0.0352653	0.124246	0.342871	0.0320068	8.89885e-27	-0.158105	0.103906	0.128108	0.565086	20	-0.361761	0.0455508	0.85376	0.696449	1.0466	0.854(0.696,1.047)	0.910824
	cg24503796	10	SCD	102107676	rs735877	10	102104521	T	C	0.413088	-0.0532197	0.0348483	0.126715	0.554553	0.0320904	6.54769e-67	-0.0959687	0.0630852	0.128196	0.371159	20	-0.219616	0.0276783	0.908492	0.802827	1.02806	0.908(0.803,1.028)	0.910824
	cg09908042	15	PCSK6	102025217	rs11247300	15	102025218	A	G	0.137014	0.0800169	0.0526697	0.128707	-1.9057	0.0268364	0	-0.0419882	0.0276443	0.128794	0.2096	20	-0.096171	0.0121946	0.958881	0.908309	1.01227	0.959(0.908,1.012)	0.910824
	cg25064352	4	WFS1	6305036	rs6830765	4	6271826	T	C	0.395706	-0.0549201	0.0351638	0.118327	0.212047	0.0329148	1.17669e-10	-0.259	0.170634	0.129048	0.222285	20	-0.593443	0.0754426	0.771823	0.552422	1.07836	0.772(0.552,1.078)	0.910824
	cg00045070	1	PCSK9	55504649	rs2479409	1	55504650	G	A	0.320041	-0.0607337	0.0399953	0.128883	1.2334	0.0240328	0	-0.0492409	0.0324411	0.129051	0.655609	20	-0.112825	0.0143437	0.951952	0.893307	1.01445	0.952(0.893,1.014)	0.910824
	cg23628760	11	BRSK2	1380355	rs10741680	11	1376818	T	C	0.229039	-0.0630969	0.0412168	0.125805	-0.429503	0.0371773	7.14206e-31	0.146907	0.0968027	0.129117	0.473374	20	-0.0428263	0.33664	1.15825	0.958078	1.40024	1.158(0.958,1.4)	0.910824
	cg21163128	11	BSCL2	62477362	rs549312	11	62479846	T	C	0.205521	0.0643172	0.0417475	0.123409	-0.322001	0.0367881	2.08019e-18	-0.199742	0.131643	0.129191	0.98379	6	-0.457762	0.0582783	0.818942	0.632698	1.06001	0.819(0.633,1.06)	0.910824
	cg12634208	8	ANK1	41570802	rs558889	8	41571433	T	C	0.353783	-0.0543055	0.0353711	0.124708	0.333524	0.0343292	2.59066e-22	-0.162823	0.107369	0.129395	0.0908349	20	-0.373266	0.0476202	0.849742	0.688482	1.04877	0.85(0.688,1.049)	0.910824
	cg23923934	6	HLA-B	31322914	rs1140546	6	31322888	A	G	0.236196	-0.0708971	0.0464614	0.127025	0.482794	0.0360699	7.40477e-41	-0.146848	0.0968577	0.12949	0.218004	20	-0.336689	0.0429931	0.863425	0.714131	1.04393	0.863(0.714,1.044)	0.910824
	cg26714263	17	RPTOR	78860511	rs2672878	17	78859894	T	C	0.277096	0.0599593	0.0392766	0.126863	-0.464528	0.0359346	3.16713e-38	-0.129076	0.0851392	0.129505	0.695298	20	-0.295949	0.0377968	0.878907	0.743825	1.03852	0.879(0.744,1.039)	0.910824
	cg02896941	4	PPARGC1A	23890659	rs2970872	4	23889813	A	G	0.441718	-0.0552212	0.0358706	0.123693	0.282784	0.0325723	3.89799e-18	-0.195277	0.128827	0.129568	0.954265	20	-0.447778	0.0572239	0.822607	0.639047	1.05889	0.823(0.639,1.059)	0.910824
	cg22572614	3	TNFSF10	172241975	rs3136591	3	172234969	A	G	0.50409	0.0538865	0.0346952	0.12039	0.220826	0.0326584	1.36385e-11	0.244022	0.161207	0.130097	0.266995	13	-0.0719437	0.559988	1.27637	0.930583	1.75065	1.276(0.931,1.751)	0.910824
	cg09564913	11	STT3A	125463439	rs479195	11	125546479	C	T	0.501022	0.0538101	0.0342621	0.116289	-0.172187	0.0305392	1.71813e-08	-0.31251	0.206558	0.130295	0.801906	12	-0.717364	0.0923437	0.731608	0.488037	1.09674	0.732(0.488,1.097)	0.910824
	cg07664579	5	SLC6A3	1420305	rs10053602	5	1428135	C	T	0.232106	-0.0630855	0.0417118	0.130428	-1.59613	0.0184759	0	0.0395241	0.0261371	0.130487	0.142294	20	-0.0117046	0.0907528	1.04032	0.988364	1.095	1.04(0.988,1.095)	0.910824
	cg19878200	11	TH	2187421	rs4072826	11	2187482	C	G	0.319018	-0.0617578	0.0408213	0.13031	0.857979	0.0305337	9.95947e-174	-0.0719805	0.0476473	0.130866	0.877723	20	-0.165369	0.0214082	0.930549	0.847581	1.02164	0.931(0.848,1.022)	0.910824
	cg00833393	9	CREB3	35731638	rs3750437	9	35757362	T	A	0.338446	-0.0548921	0.0362468	0.129925	0.648399	0.0323784	3.29126e-89	-0.0846579	0.0560617	0.131022	0.591055	20	-0.194539	0.025223	0.918827	0.823214	1.02554	0.919(0.823,1.026)	0.910824
	cg15473617	16	SPG7	89593170	rs3114900	16	89389645	G	C	0.0511247	0.133293	0.0865934	0.123731	-0.598828	0.0771681	8.48975e-15	-0.22259	0.147422	0.131074	0.67752	14	-0.511537	0.0663571	0.800443	0.599573	1.06861	0.8(0.6,1.069)	0.910824
	cg06375761	6	TAPBP	33280408	rs3106191	6	33280505	A	C	0.293456	0.0553942	0.0367068	0.131274	1.18214	0.0270841	0	0.0468592	0.0310697	0.131504	0.926578	20	-0.0140374	0.107756	1.04797	0.986061	1.11378	1.048(0.986,1.114)	0.910824
	cg13638257	6	TAPBP	33280436	rs3106191	6	33280505	A	C	0.293456	0.0553942	0.0367068	0.131274	1.16278	0.0274723	0	0.0476394	0.0315882	0.131519	0.918001	20	-0.0142735	0.109552	1.04879	0.985828	1.11578	1.049(0.986,1.116)	0.910824
	cg26083458	6	TAPBP	33280424	rs3106191	6	33280505	A	C	0.293456	0.0553942	0.0367068	0.131274	1.12538	0.0283933	0	0.0492226	0.0326409	0.131553	0.673071	20	-0.0147536	0.113199	1.05045	0.985355	1.11985	1.05(0.985,1.12)	0.910824
	cg14419102	6	TAPBP	33280400	rs3106191	6	33280505	A	C	0.293456	0.0553942	0.0367068	0.131274	1.12175	0.0286128	0	0.0493819	0.0327471	0.13156	0.813353	20	-0.0148024	0.113566	1.05062	0.985307	1.12027	1.051(0.985,1.12)	0.910824
	cg05431670	6	DAXX	33290873	rs3106191	6	33280505	A	C	0.293456	0.0553942	0.0367068	0.131274	1.04429	0.0295257	5.14595e-274	0.0530448	0.035182	0.131625	0.809921	20	-0.0159119	0.122002	1.05448	0.984214	1.12976	1.054(0.984,1.13)	0.910824
	cg18353226	6	TAPBP	33280390	rs3106191	6	33280505	A	C	0.293456	0.0553942	0.0367068	0.131274	0.991666	0.031124	9.04117e-223	0.0558597	0.0370568	0.131706	0.905553	20	-0.0167716	0.128491	1.05745	0.983368	1.13711	1.057(0.983,1.137)	0.910824
	cg05700142	6	TAPBP	33280454	rs3106191	6	33280505	A	C	0.293456	0.0553942	0.0367068	0.131274	0.971927	0.0314845	3.01843e-209	0.0569942	0.0378122	0.131735	0.877179	20	-0.0171177	0.131106	1.05865	0.983028	1.14009	1.059(0.983,1.14)	0.910824
	cg02863594	6	TAPBP	33280199	rs3106191	6	33280505	A	C	0.293456	0.0553942	0.0367068	0.131274	0.931279	0.0319681	1.43286e-186	0.0594818	0.0394684	0.131791	0.777344	20	-0.0178763	0.13684	1.06129	0.982283	1.14664	1.061(0.982,1.147)	0.910824
	cg20998791	6	TAPBP	33280228	rs3106191	6	33280505	A	C	0.293456	0.0553942	0.0367068	0.131274	0.886283	0.0326479	2.76914e-162	0.0625017	0.0414806	0.13187	0.752793	20	-0.0188003	0.143804	1.0645	0.981375	1.15466	1.064(0.981,1.155)	0.910824
	cg01253676	6	TAPBP	33280212	rs3106191	6	33280505	A	C	0.293456	0.0553942	0.0367068	0.131274	0.856546	0.0329821	1.07958e-148	0.0646716	0.0429268	0.131925	0.85374	20	-0.0194649	0.148808	1.06681	0.980723	1.16045	1.067(0.981,1.16)	0.910824
	cg01654446	6	TAPBP	33280476	rs3106191	6	33280505	A	C	0.293456	0.0553942	0.0367068	0.131274	0.855008	0.032935	1.38401e-148	0.0647879	0.043004	0.131925	0.886751	20	-0.0194999	0.149076	1.06693	0.980689	1.16076	1.067(0.981,1.161)	0.910824
	cg12589538	6	TAPBP	33280149	rs3106191	6	33280505	A	C	0.293456	0.0553942	0.0367068	0.131274	0.808109	0.0333685	1.44701e-129	0.0685479	0.0455112	0.132022	0.838142	20	-0.0206541	0.15775	1.07095	0.979558	1.17087	1.071(0.98,1.171)	0.910824
	cg03780271	6	TAPBP	33280052	rs3106191	6	33280505	A	C	0.293456	0.0553942	0.0367068	0.131274	0.799928	0.0331481	1.15452e-128	0.0692489	0.0459773	0.132027	0.844256	20	-0.0208666	0.159364	1.0717	0.97935	1.17277	1.072(0.979,1.173)	0.910824
	cg18930100	6	TAPBP	33280478	rs3106191	6	33280505	A	C	0.293456	0.0553942	0.0367068	0.131274	0.724931	0.033966	4.546e-101	0.076413	0.0507614	0.132237	0.860583	20	-0.0230793	0.175905	1.07941	0.977185	1.19233	1.079(0.977,1.192)	0.910824
	cg11796996	6	TAPBP	33280159	rs3106191	6	33280505	A	C	0.293456	0.0553942	0.0367068	0.131274	0.724466	0.0341344	5.74464e-100	0.0764621	0.0507954	0.132248	0.907321	20	-0.0230969	0.176021	1.07946	0.977168	1.19246	1.079(0.977,1.192)	0.910824
	cg13826470	6	DAXX	33290842	rs3106191	6	33280505	A	C	0.293456	0.0553942	0.0367068	0.131274	0.666871	0.0320082	2.11276e-96	0.0830658	0.0551876	0.132285	0.748645	20	-0.0251019	0.191233	1.08661	0.975211	1.21074	1.087(0.975,1.211)	0.910824
	cg26521092	6	DAXX	33290857	rs3106191	6	33280505	A	C	0.293456	0.0553942	0.0367068	0.131274	0.613508	0.0315625	3.68979e-84	0.0902909	0.0600111	0.132435	0.85522	20	-0.0273309	0.207913	1.09449	0.973039	1.23111	1.094(0.973,1.231)	0.910824
	cg00521887	18	PIK3C3	39535162	rs3813065	18	39534825	T	C	0.135992	-0.0788366	0.0515851	0.126442	-0.406226	0.0476578	1.54393e-17	0.194071	0.129011	0.132505	0.627945	13	-0.0587906	0.446933	1.21418	0.942904	1.56351	1.214(0.943,1.564)	0.910824
	cg21420366	1	NGF	115880072	rs4634908	1	115879821	G	C	0.489775	-0.0579186	0.0382682	0.130154	0.43094	0.0315642	1.94246e-42	-0.134401	0.0893456	0.13251	0.458079	20	-0.309518	0.0407164	0.874239	0.7338	1.04156	0.874(0.734,1.042)	0.910824
	cg21437561	4	TLR3	187026872	rs6552954	4	187024308	A	T	0.474438	-0.0542096	0.0352653	0.124246	0.234821	0.0321421	2.75816e-13	-0.230855	0.153468	0.132516	0.371058	14	-0.531652	0.0699423	0.793855	0.587633	1.07245	0.794(0.588,1.072)	0.910824
	cg16858587	3	SCN5A	38658093	rs34767956	3	38658143	A	G	0.412065	-0.0536265	0.0354046	0.129854	-0.399086	0.0316286	1.68319e-36	0.134373	0.0893511	0.132612	0.426726	20	-0.0407552	0.309501	1.14382	0.960064	1.36275	1.144(0.96,1.363)	0.910824
	cg26794883	12	CACNA1C	2376330	rs2239028	12	2332210	T	C	0.0817996	-0.109126	0.0699229	0.118603	-0.324145	0.0577082	1.94344e-08	0.336659	0.223887	0.132658	0.127051	3	-0.10216	0.775478	1.40026	0.902886	2.17163	1.4(0.903,2.172)	0.910824
	cg23065768	11	KCNJ11	17411712	rs8192690	11	17414570	T	C	0.0531697	-0.104615	0.0677252	0.12242	-0.472969	0.0730235	9.36023e-11	0.221188	0.147208	0.132954	0.484187	3	-0.0673397	0.509716	1.24756	0.934878	1.66482	1.248(0.935,1.665)	0.910824
	cg11268327	6	MICA	31380198	rs114890635	6	31398376	G	A	0.175869	-0.0812332	0.0540556	0.132898	-1.73172	0.0305016	0	0.046909	0.0312259	0.133034	0.0717494	20	-0.0142938	0.108112	1.04803	0.985808	1.11417	1.048(0.986,1.114)	0.910824
	cg14594111	9	DAB2IP	124463457	rs10818583	9	124422261	A	G	0.213701	-0.0587108	0.039035	0.132567	-0.710822	0.0349022	3.34146e-92	0.0825957	0.0550648	0.133622	0.463538	20	-0.0253313	0.190523	1.0861	0.974987	1.20988	1.086(0.975,1.21)	0.910824
	cg19357849	19	ELAVL1	8071093	rs75800049	19	8092395	A	C	0.212679	-0.0680728	0.0451491	0.131622	0.550896	0.0384476	1.45285e-46	-0.123567	0.0824082	0.133755	0.401752	20	-0.285087	0.0379531	0.883762	0.751949	1.03868	0.884(0.752,1.039)	0.910824
	cg15826479	17	RPTOR	78806493	rs2589158	17	78818603	G	A	0.159509	0.0716704	0.0471533	0.128525	-0.355419	0.0402354	1.0145e-18	-0.201651	0.134619	0.134151	0.936634	6	-0.465504	0.0622022	0.81738	0.627818	1.06418	0.817(0.628,1.064)	0.910824
	cg18773937	2	IL1B	113594611	rs1143627	2	113594387	G	A	0.358896	0.056134	0.0367323	0.126465	-0.249755	0.0338948	1.72517e-13	-0.224756	0.150203	0.134563	0.523996	8	-0.519154	0.0696419	0.798711	0.595024	1.07212	0.799(0.595,1.072)	0.910824
	cg13938349	7	CAMK2B	44364084	rs116913033	7	44365549	T	C	0.157464	-0.0706844	0.0466486	0.129708	0.403456	0.0429231	5.48135e-21	-0.175197	0.117115	0.134669	0.897479	13	-0.404742	0.0543484	0.839292	0.667149	1.05585	0.839(0.667,1.056)	0.910824
	cg14460564	9	SIGMAR1	34638005	rs10972177	9	34629811	A	G	0.148262	0.0722953	0.0474826	0.127868	-0.336591	0.0427224	3.31184e-15	-0.214787	0.143679	0.13494	0.81274	11	-0.496398	0.0668238	0.806713	0.608719	1.06911	0.807(0.609,1.069)	0.910824
	cg09970967	14	PSEN1	73602752	rs61986542	14	73470706	T	C	0.0817996	-0.0955322	0.0631115	0.130101	0.518933	0.0547489	2.58159e-21	-0.184094	0.123159	0.134976	0.844817	20	-0.425486	0.0572976	0.831858	0.653452	1.05897	0.832(0.653,1.059)	0.910824
	cg15676528	2	YWHAQ	9865398	rs4669444	2	9869267	G	A	0.439673	-0.0541926	0.0352579	0.124285	0.200866	0.0316538	2.21399e-10	-0.269795	0.180605	0.135218	0.573058	3	-0.623781	0.0841908	0.763536	0.535914	1.08784	0.764(0.536,1.088)	0.910824
	cg19005390	13	COL4A1	110852582	rs574430	13	110852220	G	A	0.393661	-0.0571423	0.0370514	0.123014	-0.195117	0.0327991	2.7003e-09	0.292862	0.196171	0.135466	0.365451	3	-0.0916332	0.677357	1.34026	0.91244	1.96867	1.34(0.912,1.969)	0.910824
	cg06133205	13	DLEU2	50701960	rs2812203	13	50703690	T	C	0.213701	-0.0662412	0.0438491	0.130875	-0.37239	0.038385	2.97231e-22	0.177881	0.11917	0.135523	0.755252	12	-0.0556922	0.411454	1.19468	0.94583	1.50901	1.195(0.946,1.509)	0.910824
	cg20925383	13	DLEU2	50702410	rs9316484	13	50645164	C	T	0.212679	-0.0666655	0.0434665	0.125098	-0.247266	0.038784	1.82416e-10	0.26961	0.180803	0.135914	0.854959	5	-0.0847639	0.623984	1.30945	0.918729	1.86635	1.309(0.919,1.866)	0.910824
	cg12433386	11	KCNQ1OT1	2722340	rs231356	11	2705343	T	A	0.292434	-0.0570641	0.0376197	0.1293	-0.28026	0.0349208	1.01035e-15	0.203611	0.136608	0.136098	0.998285	20	-0.0641407	0.471363	1.22582	0.937873	1.60218	1.226(0.938,1.602)	0.910824
	cg14178775	9	NOTCH1	139401589	rs11145764	9	139400406	T	C	0.45501	-0.0632338	0.0422001	0.134022	0.417803	0.0306189	2.15443e-42	-0.151348	0.101612	0.136362	0.378483	20	-0.350508	0.0478115	0.859549	0.704331	1.04897	0.86(0.704,1.049)	0.910824
	cg04086445	6	DAXX	33290840	rs3106191	6	33280505	A	C	0.293456	0.0553942	0.0367068	0.131274	-0.323621	0.0349779	2.19983e-20	-0.17117	0.114924	0.136378	0.815082	18	-0.396421	0.054081	0.842678	0.672723	1.05557	0.843(0.673,1.056)	0.910824
	cg22917346	13	LACC1	44453235	rs12853286	13	44446817	A	G	0.503067	-0.0519429	0.0346712	0.134092	0.397193	0.0324657	2.04017e-34	-0.130775	0.0879425	0.137001	0.196515	20	-0.303142	0.0415923	0.877415	0.738494	1.04247	0.877(0.738,1.042)	0.910824
	cg16759221	17	GOSR2	45003025	rs1662596	17	44993118	A	G	0.396728	0.0538431	0.0360212	0.134977	-0.413405	0.0312045	4.6198e-40	-0.130243	0.0876858	0.137455	0.810664	20	-0.302107	0.0416212	0.877882	0.739259	1.0425	0.878(0.739,1.042)	0.910824
	cg26500914	6	DAXX	33288323	rs2282851	6	33280309	T	C	0.293456	0.0554081	0.0367064	0.131172	0.29257	0.0365079	1.1114e-15	0.189384	0.127668	0.137966	0.632721	5	-0.0608453	0.439613	1.2085	0.940969	1.55211	1.209(0.941,1.552)	0.910824
	cg03370490	11	BRSK2	1380305	rs7479216	11	1390885	G	T	0.230061	-0.0615078	0.0412586	0.136017	-0.536322	0.0368153	4.49517e-48	0.114684	0.0773305	0.138063	0.564289	20	-0.0368838	0.266252	1.12152	0.963788	1.30506	1.122(0.964,1.305)	0.910824
	cg00666422	7	LEP	127881440	rs10954173	7	127891440	A	G	0.379346	-0.0554551	0.0363235	0.126836	0.210281	0.0336846	4.30233e-10	-0.263719	0.177829	0.138076	0.980984	8	-0.612264	0.0848258	0.768189	0.542122	1.08853	0.768(0.542,1.089)	0.910824
	cg27457201	17	RPTOR	78854232	rs2004184	17	78859501	C	T	0.280164	0.0592768	0.0395853	0.134278	-0.380274	0.035648	1.4452e-26	-0.155879	0.105118	0.1381	0.462694	20	-0.36191	0.0501523	0.855663	0.696345	1.05143	0.856(0.696,1.051)	0.910824
	cg26624134	11	KCNJ5	128761419	rs11221502	11	128767035	T	C	0.189162	-0.0698882	0.0454024	0.12373	-0.230502	0.0421096	4.40329e-08	0.3032	0.204612	0.138386	0.159472	5	-0.0978395	0.70424	1.35419	0.906794	2.02231	1.354(0.907,2.022)	0.910824
	cg25194807	1	ICMT	6295368	rs4908866	1	6279778	T	G	0.0858896	0.112063	0.075094	0.135621	0.728239	0.061194	1.17658e-32	0.153882	0.103925	0.138686	0.881296	5	-0.049811	0.357575	1.16635	0.951409	1.42986	1.166(0.951,1.43)	0.910824
	cg03477252	6	DAXX	33288180	rs3106191	6	33280505	A	C	0.293456	0.0553942	0.0367068	0.131274	0.271433	0.0361998	6.47095e-14	0.20408	0.137945	0.139025	0.487214	6	-0.0662922	0.474452	1.2264	0.935857	1.60713	1.226(0.936,1.607)	0.910824
	cg03317682	6	ATF6B	32086091	rs635348	6	31902289	G	C	0.0654397	0.111571	0.0753722	0.1388	-1.88286	0.0460512	0	-0.0592564	0.040057	0.139059	0.801188	20	-0.137768	0.0192553	0.942465	0.871301	1.01944	0.942(0.871,1.019)	0.910824
	cg20012848	12	NR4A1	52435420	rs10876229	12	52437082	T	C	0.203476	-0.0710192	0.0478201	0.137509	-0.648865	0.0408243	6.96344e-57	0.109451	0.0740191	0.139223	0.274528	20	-0.0356264	0.254528	1.11567	0.965001	1.28985	1.116(0.965,1.29)	0.910824
	cg06230948	6	TAPBP	33280518	rs3106191	6	33280505	A	C	0.293456	0.0553942	0.0367068	0.131274	0.262779	0.0355713	1.49735e-13	0.210801	0.142572	0.139258	0.807087	20	-0.0686401	0.490242	1.23467	0.933663	1.63271	1.235(0.934,1.633)	0.910824
	cg05498681	20	SRC	35973318	rs6094324	20	35957878	G	A	0.222904	0.0628791	0.0414384	0.129163	0.227214	0.034964	8.11134e-11	0.27674	0.187282	0.139498	0.719147	18	-0.0903327	0.643813	1.31882	0.913627	1.90373	1.319(0.914,1.904)	0.910824
	cg15758240	7	LEP	127876829	rs1349419	7	127877213	A	G	0.448875	-0.0507985	0.0342723	0.138287	0.571417	0.0309423	3.7953e-76	-0.0888992	0.0601707	0.139555	0.211065	20	-0.206834	0.0290354	0.914938	0.813155	1.02946	0.915(0.813,1.029)	0.910824
	cg07123182	11	KCNQ1OT1	2722391	rs231841	11	2723604	T	G	0.356851	-0.0537187	0.0358593	0.134123	-0.30031	0.0336859	4.8784e-19	0.178877	0.121082	0.139588	0.999514	20	-0.0584437	0.416198	1.19587	0.943231	1.51619	1.196(0.943,1.516)	0.910824
	cg03860311	7	CAMK2B	44364211	rs11772021	7	44362545	T	C	0.159509	-0.0688213	0.046044	0.134996	0.406198	0.0425385	1.31022e-21	-0.169428	0.114734	0.139755	0.401202	20	-0.394307	0.0554506	0.844148	0.674147	1.05702	0.844(0.674,1.057)	0.910824
	cg17413943	11	BDNF	27739827	rs10767665	11	27733858	A	G	0.469325	0.0518881	0.03451	0.132693	0.249016	0.0319138	6.05589e-15	0.208372	0.141135	0.139835	0.284537	20	-0.0682526	0.484997	1.23167	0.934025	1.62417	1.232(0.934,1.624)	0.910824
	cg01756424	3	RPN1	128335546	rs74913388	3	128397899	T	C	0.201431	-0.077016	0.0505346	0.127502	0.232379	0.0398584	5.53918e-09	-0.331424	0.224773	0.140352	0.301153	12	-0.771979	0.109131	0.717901	0.462098	1.11531	0.718(0.462,1.115)	0.910824
	cg23715728	6	MICA	31379258	rs114890635	6	31398376	G	A	0.175869	-0.0812332	0.0540556	0.132898	0.361465	0.0474279	2.51021e-14	-0.224733	0.152425	0.140379	0.0658211	10	-0.523486	0.07402	0.798729	0.592452	1.07683	0.799(0.592,1.077)	0.910824
	cg21012647	2	CFLAR	201981814	rs115947566	2	201119367	A	G	0.0460123	0.11627	0.077925	0.13568	0.785933	0.0846531	1.62985e-20	0.147938	0.100422	0.140706	0.627885	6	-0.0488891	0.344765	1.15944	0.952287	1.41166	1.159(0.952,1.412)	0.910824
	cg07746998	6	ESR1	152126785	rs523736	6	152123895	G	A	0.466258	0.0534936	0.0358151	0.135279	-0.286431	0.0322859	7.20375e-19	-0.186759	0.126799	0.140785	0.0791351	20	-0.435285	0.061767	0.829644	0.64708	1.06371	0.83(0.647,1.064)	0.910824
	cg21141812	3	SHISA5	48556323	rs2267846	3	48556339	A	G	0.258691	0.0567365	0.0384866	0.14043	-0.964664	0.0297286	5.59165e-231	-0.0588148	0.0399375	0.14084	0.620959	20	-0.137092	0.0194627	0.942881	0.87189	1.01965	0.943(0.872,1.02)	0.910824
	cg02626977	14	CDKN3	54863550	rs2235961	14	54863577	G	A	0.285276	0.058528	0.0386042	0.129493	0.217628	0.035208	6.36132e-10	0.268936	0.182644	0.140897	0.78239	6	-0.0890462	0.626918	1.30857	0.914803	1.87183	1.309(0.915,1.872)	0.910824
	cg06144361	10	KCNMA1	79003155	rs542007	10	79005918	A	C	0.346626	0.0560055	0.0367166	0.127173	-0.182509	0.0329501	3.04286e-08	-0.306864	0.208666	0.141399	0.531587	9	-0.715849	0.102121	0.735751	0.488777	1.10752	0.736(0.489,1.108)	0.910824
	cg22904406	6	DAXX	33288296	rs3106191	6	33280505	A	C	0.293456	0.0553942	0.0367068	0.131274	0.237507	0.0364368	7.10984e-11	0.233232	0.158638	0.141505	0.604237	4	-0.0776985	0.544162	1.26267	0.925243	1.72316	1.263(0.925,1.723)	0.910824
	cg02427468	7	ESYT2	158575934	rs12698279	7	158523365	T	C	0.102249	-0.0844537	0.0555966	0.128751	-0.307474	0.0526853	5.34528e-09	0.27467	0.186842	0.141544	0.943551	13	-0.0915403	0.64088	1.3161	0.912525	1.89815	1.316(0.913,1.898)	0.910824
	cg22456192	18	CYB5A	71959684	rs2850585	18	71948921	G	A	0.170757	0.0692809	0.0461613	0.133396	0.290167	0.0399819	3.94408e-13	0.238762	0.162451	0.141631	0.687276	20	-0.079642	0.557166	1.26968	0.923447	1.74572	1.27(0.923,1.746)	0.910824
	cg22582364	20	DDRGK1	3185115	rs6037498	20	3185982	T	C	0.0705521	0.0988811	0.0666133	0.137702	-0.626752	0.062418	1.00446e-23	-0.157767	0.107438	0.141983	0.681117	8	-0.368345	0.0528115	0.854049	0.691878	1.05423	0.854(0.692,1.054)	0.910824
	cg13139838	6	MICA	31382197	rs114890635	6	31398376	G	A	0.175869	-0.0812332	0.0540556	0.132898	0.320957	0.0467099	6.36249e-12	-0.253097	0.172401	0.142085	0.124893	6	-0.591003	0.084809	0.776393	0.553772	1.08851	0.776(0.554,1.089)	0.910824
	cg17621507	6	TAPBP	33279666	rs2282851	6	33280309	T	C	0.293456	0.0554081	0.0367064	0.131172	0.220467	0.035449	4.9944e-10	0.251321	0.171328	0.142402			-0.0844819	0.587124	1.28572	0.918988	1.79881	1.286(0.919,1.799)	0.910824
	cg11054816	11	BACE1	117183853	rs477036	11	117183914	C	T	0.465235	-0.0517304	0.0350057	0.139469	-0.367522	0.0319012	1.03829e-30	0.140755	0.0960282	0.142713	0.815194	20	-0.0474603	0.32897	1.15114	0.953648	1.38954	1.151(0.954,1.39)	0.910824
	cg12800803	20	PSMA7	60717299	rs6142947	20	60675133	T	C	0.127812	-0.0815666	0.0541408	0.131922	0.299856	0.0476903	3.22488e-10	-0.272019	0.185667	0.142895	0.369265	10	-0.635926	0.0918883	0.76184	0.529445	1.09624	0.762(0.529,1.096)	0.910824
	cg01295249	2	NCK2	106419144	rs4316956	2	106406225	C	G	0.398773	0.0519322	0.0352915	0.14115	0.478161	0.0321516	5.00504e-50	0.108608	0.0741671	0.143092	0.581795	20	-0.0367595	0.253976	1.11473	0.963908	1.28914	1.115(0.964,1.289)	0.910824
	cg11297256	11	KCNQ1OT1	2720810	rs231841	11	2723604	T	G	0.356851	-0.0537187	0.0358593	0.134123	0.224124	0.033409	1.96634e-11	-0.239683	0.163938	0.143733	0.98626	14	-0.561001	0.0816355	0.786877	0.570637	1.08506	0.787(0.571,1.085)	0.910824
	cg03240059	12	NR4A1	52430400	rs2603762	12	52430661	A	C	0.162577	-0.0732208	0.0497578	0.141144	-0.620189	0.0497606	1.18134e-35	0.118062	0.0807874	0.143908	0.499364	11	-0.0402813	0.276405	1.12531	0.960519	1.31838	1.125(0.961,1.318)	0.910824
	cg20048260	13	COL4A1	110802968	rs2298237	13	110804455	A	G	0.0572597	-0.109513	0.0745828	0.142011	-0.884882	0.0628771	5.54998e-45	0.12376	0.0847431	0.144175			-0.0423365	0.289856	1.13174	0.958547	1.33624	1.132(0.959,1.336)	0.910824
	cg21327887	17	MAPT	43971928	rs199503	17	44862162	A	G	0.214724	0.0714267	0.0477722	0.134875	0.27235	0.0400458	1.03925e-11	0.262261	0.179596	0.144213	0.503549	18	-0.0897472	0.614269	1.29987	0.914162	1.84831	1.3(0.914,1.848)	0.910824
	cg14623093	3	GORASP1	39149090	rs4267596	3	39046361	A	G	0.366053	0.0569525	0.0385399	0.139474	-0.301521	0.0317024	1.88842e-21	-0.188884	0.129352	0.144226	0.539892	20	-0.442414	0.0646459	0.827883	0.642484	1.06678	0.828(0.642,1.067)	0.910824
	cg14144732	14	CDKN3	54863539	rs4251614	14	54868723	A	C	0.285276	0.0576858	0.0385368	0.134419	-0.219841	0.034271	1.41029e-10	-0.262398	0.180003	0.144912	0.928664	6	-0.615204	0.0904079	0.769205	0.540531	1.09462	0.769(0.541,1.095)	0.910824
	cg06070002	1	PRDX1	45986120	rs487174	1	46009536	A	G	0.0817996	-0.0835531	0.0567577	0.140994	0.561338	0.0537855	1.68726e-25	-0.148846	0.102112	0.144931	0.581832	17	-0.348986	0.0512935	0.861702	0.705403	1.05263	0.862(0.705,1.053)	0.910824
	cg12758687	11	DRD2	113346327	rs7934294	11	113369142	A	T	0.0572597	-0.105157	0.0705556	0.136117	0.430112	0.0623621	5.31106e-12	-0.244487	0.167826	0.145177	0.968884	15	-0.573426	0.084452	0.783106	0.563591	1.08812	0.783(0.564,1.088)	0.910824
	cg01951698	16	JPH3	87622589	rs9932746	16	87622525	C	T	0.375256	-0.0573265	0.0380448	0.131858	0.181063	0.0329032	3.73589e-08	-0.316611	0.217854	0.146136	0.494529	4	-0.743605	0.110383	0.728614	0.475397	1.11671	0.729(0.475,1.117)	0.910824
	cg14030282	6	MICB	31461999	rs113239947	6	31461956	T	A	0.265849	0.0602915	0.0414024	0.145328	-0.638955	0.0364856	1.14968e-68	-0.0943596	0.0650207	0.146718	0.0329637	20	-0.2218	0.033081	0.909955	0.801075	1.03363	0.91(0.801,1.034)	0.910824
	cg03182958	2	SGPP2	223288923	rs4488656	2	223285022	G	T	0.464213	0.0516038	0.0346694	0.136631	0.201784	0.032163	3.52374e-10	0.255738	0.176584	0.147546	0.222383	10	-0.0903666	0.601843	1.29141	0.913596	1.82548	1.291(0.914,1.825)	0.910824
	cg03225208	9	DAB2IP	124412094	rs7025486	9	124422403	A	G	0.216769	-0.0577401	0.0388674	0.137393	0.239173	0.0369313	9.40916e-11	-0.241416	0.166728	0.147628	0.308918	5	-0.568203	0.0853709	0.785515	0.566543	1.08912	0.786(0.567,1.089)	0.910824
	cg25424419	17	NOS2	26284491	rs12948499	17	26284469	G	T	0.273006	0.064612	0.0443437	0.145096	0.403503	0.0337446	5.92798e-33	0.160128	0.11071	0.148072	0.857536	20	-0.0568636	0.37712	1.17366	0.944723	1.45808	1.174(0.945,1.458)	0.910824
	cg09978077	22	SREBF2	42229983	rs12628667	22	41988927	C	G	0.416155	-0.0518296	0.0350036	0.138689	-0.219253	0.0328003	2.31745e-11	0.236392	0.163519	0.148275	0.812477	20	-0.0841052	0.556889	1.26667	0.919335	1.74524	1.267(0.919,1.745)	0.910824
	cg00056767	13	LACC1	44453183	rs12853286	13	44446817	A	G	0.503067	-0.0519429	0.0346712	0.134092	0.178374	0.0324122	3.72767e-08	-0.291202	0.201447	0.148303	0.575592	4	-0.686038	0.103634	0.747365	0.503567	1.10919	0.747(0.504,1.109)	0.910824
	cg01474677	9	ABL1	133586259	rs113585858	9	133551751	T	C	0.0685072	-0.100445	0.0691564	0.146381	-0.942279	0.0653317	3.70873e-47	0.106598	0.0737639	0.148423	0.950981	10	-0.0379792	0.251175	1.11249	0.962733	1.28554	1.112(0.963,1.286)	0.910824
	cg26315918	3	C3orf52	111793950	rs10511304	3	111793957	A	G	0.186094	0.0624143	0.0432209	0.148718	1.44849	0.0282976	0	0.0430892	0.0298505	0.148879	0.992169	20	-0.0154178	0.101596	1.04403	0.9847	1.10694	1.044(0.985,1.107)	0.910824
	cg13704531	2	NCK2	106406742	rs4851867	2	106398232	T	C	0.387526	0.0520848	0.0353908	0.141101	-0.233626	0.0316232	1.49285e-13	-0.222941	0.154461	0.148924	0.684093	13	-0.525685	0.0798026	0.800162	0.591151	1.08307	0.8(0.591,1.083)	0.910824
	cg08746591	7	ACTB	5599905	rs10245763	7	5603563	T	C	0.341513	-0.0588951	0.0407186	0.148068	-0.71636	0.0326161	6.45462e-107	0.0822143	0.0569642	0.148946	0.998184	20	-0.0294355	0.193864	1.08569	0.970993	1.21393	1.086(0.971,1.214)	0.910824
	cg04290510	14	CDKN3	54864231	rs4251619	14	54874556	T	C	0.285276	0.0567766	0.0385942	0.14126	0.256115	0.0348641	2.04076e-13	0.221684	0.153683	0.149168	0.971555	11	-0.0795347	0.522903	1.24818	0.923546	1.68692	1.248(0.924,1.687)	0.910824
	cg01762785	22	SREBF2	42226837	rs7287010	22	42234937	C	T	0.429448	-0.0505378	0.0349208	0.147837	-0.536234	0.0306762	2.0187e-68	0.0942458	0.0653451	0.149224	0.859461	20	-0.0338306	0.222322	1.09883	0.966735	1.24897	1.099(0.967,1.249)	0.910824
	cg26296119	11	CREB3L1	46260204	rs7113478	11	46260223	A	G	0.41411	-0.0537917	0.0370212	0.146225	0.38656	0.0326593	2.53928e-32	-0.139155	0.0964898	0.149254	0.739699	20	-0.328275	0.049965	0.870093	0.720165	1.05123	0.87(0.72,1.051)	0.910824
	cg03817164	11	BRSK2	1413990	rs7108690	11	1386742	T	C	0.0572597	-0.124008	0.0856649	0.147731	-1.42551	0.0858005	5.49753e-62	0.086992	0.0603219	0.149266	0.46228	20	-0.0312389	0.205223	1.09089	0.969244	1.2278	1.091(0.969,1.228)	0.910824
	cg23216612	7	RINT1	105171843	rs11766216	7	105193051	A	G	0.245399	0.0571614	0.0392166	0.144956	0.338608	0.0351136	5.25188e-22	0.168813	0.117133	0.149525	0.820261	14	-0.0607677	0.398394	1.1839	0.941042	1.48943	1.184(0.941,1.489)	0.910824
	cg17081048	4	TLR3	187013645	rs4608848	4	187010104	C	T	0.389571	-0.0522879	0.0356423	0.142371	-0.241788	0.0331376	2.95373e-13	0.216255	0.150361	0.150367	0.5592	14	-0.0784526	0.510963	1.24142	0.924546	1.66689	1.241(0.925,1.667)	0.910824
	cg03532331	16	CREBBP	4000474	rs76684367	16	3993816	C	G	0.0541922	-0.10885	0.0754275	0.148992	-1.30322	0.0833783	4.53353e-55	0.0835236	0.0581239	0.150721	0.755885	20	-0.0303992	0.197446	1.08711	0.970058	1.21829	1.087(0.97,1.218)	0.910824
	cg23727079	7	AGR3	16966323	rs847404	7	16966324	A	G	0.379346	-0.0525351	0.0365648	0.150784	-1.26738	0.0194825	0	0.0414517	0.0288577	0.150883	0.296901	20	-0.0151094	0.0980128	1.04232	0.985004	1.10298	1.042(0.985,1.103)	0.910824
	cg16827215	11	CSNK2A1	11292635	rs12282401	11	11292864	T	C	0.214724	0.0605537	0.0421609	0.150931	-1.50523	0.0211849	0	-0.0402289	0.0280153	0.151014	0.523667	20	-0.0951389	0.0146811	0.96057	0.909247	1.01479	0.961(0.909,1.015)	0.910824
	cg03724882	14	CDKN3	54864244	rs2179896	14	54875514	A	G	0.285276	0.0557897	0.0382843	0.145048	0.29325	0.0349671	5.01026e-17	0.190246	0.132508	0.151078	0.992347	19	-0.0694697	0.449962	1.20955	0.932888	1.56825	1.21(0.933,1.568)	0.910824
	cg00577950	21	CSTB	45176447	rs8134507	21	45172379	A	G	0.217791	0.064365	0.0436403	0.14024	-0.238508	0.03804	3.61215e-10	-0.269865	0.187966	0.151085	0.957868	13	-0.638278	0.0985484	0.763483	0.528201	1.10357	0.763(0.528,1.104)	0.910824
	cg09916783	2	POMC	25391911	rs2164411	2	25452906	A	G	0.203476	-0.0685955	0.0462243	0.137817	0.238709	0.0426747	2.22294e-08	-0.28736	0.200341	0.151471	0.843471	11	-0.680028	0.105308	0.750242	0.506603	1.11105	0.75(0.507,1.111)	0.910824
	cg09638344	4	WFS1	6271000	rs4689386	4	6264394	C	T	0.398773	-0.0514703	0.0356125	0.148377	0.355678	0.0328175	2.27231e-27	-0.14471	0.101012	0.151971	0.534685	20	-0.342694	0.0532735	0.865273	0.709856	1.05472	0.865(0.71,1.055)	0.910824
	cg14611152	9	DAB2IP	124463026	rs10985343	9	124415691	C	T	0.232106	-0.0567844	0.0394973	0.150526	-0.542787	0.0356614	2.58244e-52	0.104616	0.0730916	0.152342	0.464699	20	-0.0386435	0.247876	1.11028	0.962094	1.2813	1.11(0.962,1.281)	0.910824
	cg15690316	6	ATF6B	32096359	rs6449	6	32006655	T	C	0.302658	0.0561739	0.0380659	0.140024	0.214103	0.0368206	6.07225e-09	0.262369	0.183429	0.152615	0.141466	6	-0.0971518	0.62189	1.30001	0.907418	1.86244	1.3(0.907,1.862)	0.910824
	cg27514608	4	PPARGC1A	23892540	rs61795680	4	23897314	G	C	0.300613	-0.0536521	0.03693	0.146278	0.278073	0.0353916	3.93335e-15	-0.192942	0.135058	0.153122	0.405166	14	-0.457656	0.0717717	0.82453	0.632765	1.07441	0.825(0.633,1.074)	0.910824
	cg23599843	8	JPH1	75234269	rs28688760	8	75232531	A	G	0.249489	0.0567399	0.0395815	0.151716	-0.624514	0.0372965	6.20126e-63	-0.0908544	0.0636115	0.153214	0.0342315	20	-0.215533	0.0338241	0.913151	0.806112	1.0344	0.913(0.806,1.034)	0.910824
	cg02491905	2	PDIA6	10975305	rs7568397	2	11020903	A	T	0.0961145	-0.0927933	0.0648068	0.152188	-1.02462	0.0523184	2.10395e-85	0.0905636	0.0634184	0.153282	0.555169	7	-0.0337365	0.214864	1.09479	0.966826	1.23969	1.095(0.967,1.24)	0.910824
	cg03438552	6	TAP2	32805548	rs2071544	6	32806121	C	T	0.477505	-0.0493451	0.0344634	0.152198	0.453923	0.0305863	7.98598e-50	-0.108708	0.0762759	0.154101	0.333414	20	-0.258209	0.0407928	0.896992	0.772434	1.04164	0.897(0.772,1.042)	0.910824
	cg13646480	9	PTGS1	125110034	rs3793619	9	124981911	G	C	0.352761	-0.0544285	0.0369023	0.14023	0.182627	0.0334615	4.81986e-08	-0.298031	0.209312	0.154488	0.947007	5	-0.708283	0.112221	0.742278	0.492489	1.11876	0.742(0.492,1.119)	0.910824
	cg23560159	6	TAP2	32805748	rs2071544	6	32806121	C	T	0.477505	-0.0493451	0.0344634	0.152198	0.413561	0.0312859	6.83955e-40	-0.119318	0.0838207	0.154595	0.287679	20	-0.283607	0.0449706	0.887526	0.753063	1.046	0.888(0.753,1.046)	0.910824
	cg06623918	6	UFL1	96969491	rs4598081	6	96975227	A	G	0.374233	-0.0513723	0.0360408	0.154044	-0.803096	0.0321497	1.01177e-137	0.0639678	0.0449504	0.154714	0.585908	20	-0.024135	0.152071	1.06606	0.976154	1.16424	1.066(0.976,1.164)	0.910824
	cg15109207	19	PLA2G4C	48614773	rs153023	19	48624625	T	C	0.466258	0.049187	0.0345019	0.153975	-0.711221	0.0308137	7.12954e-118	-0.0691585	0.0486033	0.154759	0.0464744	20	-0.164421	0.026104	0.933179	0.848385	1.02645	0.933(0.848,1.026)	0.910824
	cg12648759	1	ATF6	161812851	rs61802510	1	161812478	G	T	0.303681	-0.0510138	0.0357582	0.153687	-0.622833	0.0337011	2.93237e-76	0.081906	0.057583	0.154911	0.0077378	20	-0.0309567	0.194769	1.08535	0.969518	1.21503	1.085(0.97,1.215)	0.910824
	cg10088320	6	TAP2	32805759	rs2071544	6	32806121	C	T	0.477505	-0.0493451	0.0344634	0.152198	0.37884	0.0314687	2.22664e-33	-0.130253	0.091612	0.155087	0.264853	20	-0.309813	0.0493065	0.877873	0.733584	1.05054	0.878(0.734,1.051)	0.910824
	cg14266248	8	ASPH	62606211	rs2350923	8	62605259	C	T	0.297546	-0.0546302	0.037598	0.146221	0.238161	0.0345559	5.49978e-12	-0.229383	0.161338	0.155097	0.486875	14	-0.545605	0.0868395	0.795024	0.579491	1.09072	0.795(0.579,1.091)	0.910824
	cg13782615	11	STIM1	4079556	rs2959068	11	4077048	T	A	0.456033	0.0487012	0.034092	0.153142	-0.423042	0.0327088	2.90949e-38	-0.115121	0.0810779	0.15564	0.539113	20	-0.274034	0.0437917	0.891258	0.760306	1.04476	0.891(0.76,1.045)	0.910824
	cg16616514	4	WFS1	6324629	rs36034740	4	6319847	C	T	0.095092	-0.0742296	0.0516635	0.150778	-0.428638	0.0465917	3.58327e-20	0.173175	0.12199	0.155729	0.954566	20	-0.0659254	0.412275	1.18907	0.936201	1.51025	1.189(0.936,1.51)	0.910824
	cg23247955	17	LRRC59	48475522	rs7207714	17	48492706	A	G	0.432515	-0.0504386	0.0355061	0.155444	0.968793	0.0279933	1.91313e-262	-0.0520633	0.0366807	0.155792	0.210227	20	-0.123957	0.0198309	0.949269	0.883417	1.02003	0.949(0.883,1.02)	0.910824
	cg06750564	7	TBXAS1	139637446	rs2284207	7	139640362	C	T	0.366053	0.0543031	0.0370071	0.142275	-0.193134	0.0351754	4.00579e-08	-0.281168	0.198338	0.156302	0.774664	5	-0.66991	0.107574	0.754902	0.511754	1.11357	0.755(0.512,1.114)	0.910824
	cg23019125	17	RPTOR	78820391	rs2248502	17	78821572	A	G	0.152352	0.0676935	0.0475991	0.15498	-0.652974	0.0395924	4.16003e-61	-0.10367	0.0731664	0.156512	0.445635	20	-0.247076	0.0397361	0.901523	0.781081	1.04054	0.902(0.781,1.041)	0.910824
	cg05212892	7	ESYT2	158533877	rs76757895	7	158521614	C	T	0.170757	-0.0687581	0.0476784	0.149268	-0.331889	0.0440778	5.08886e-14	0.207172	0.146269	0.156665	0.329657	20	-0.0795152	0.493859	1.23019	0.923564	1.63863	1.23(0.924,1.639)	0.910824
	cg01777861	4	KDR	56023843	rs7696256	4	56023747	G	A	0.484663	0.048815	0.0344321	0.156273	0.868104	0.0278728	5.89071e-213	0.0562317	0.0397046	0.156702	0.763122	20	-0.0215893	0.134053	1.05784	0.978642	1.14345	1.058(0.979,1.143)	0.910824
	cg17968347	7	SERPINE1	100777740	rs2227679	7	100776302	T	C	0.449898	-0.0505429	0.0350805	0.14965	-0.245197	0.031945	1.64638e-14	0.206132	0.145569	0.156764	0.618395	17	-0.0791832	0.491447	1.22892	0.923871	1.63468	1.229(0.924,1.635)	0.910824
	cg18784875	12	ITPR2	27010516	rs11048749	12	27011425	T	A	0.103272	0.0703463	0.0498196	0.157944	-1.3558	0.0400988	1.33714e-250	-0.0518854	0.0367775	0.158306	0.986259	20	-0.123969	0.0201985	0.949438	0.883407	1.0204	0.949(0.883,1.02)	0.910824
	cg10360906	4	KDR	56023751	rs11936364	4	56019253	T	C	0.484663	0.0483544	0.0342911	0.158505	1.09893	0.0233281	0	0.0440013	0.031218	0.158692	0.788741	20	-0.017186	0.105189	1.04498	0.982961	1.11092	1.045(0.983,1.111)	0.910824
	cg10323433	13	HTR2A	47471562	rs9534512	13	47473921	A	C	0.406953	0.0489048	0.0346193	0.157759	0.653381	0.0311041	5.74424e-98	0.0748489	0.0531045	0.158698	0.361602	20	-0.0292359	0.178934	1.07772	0.971187	1.19594	1.078(0.971,1.196)	0.910824
	cg20906621	3	AGTR1	148416308	rs4681428	3	148277320	G	A	0.274029	0.0585105	0.0408299	0.151849	0.268033	0.0346821	1.09005e-14	0.218296	0.154928	0.158832	0.571187	20	-0.0853629	0.521955	1.24396	0.918179	1.68532	1.244(0.918,1.685)	0.910824
	cg18814083	8	CLU	27445941	rs11135998	8	27434831	A	C	0.0490798	-0.110707	0.078352	0.157671	-1.38821	0.076038	1.8269e-74	0.0797482	0.0566098	0.158914	0.950319	16	-0.031207	0.190703	1.08301	0.969275	1.2101	1.083(0.969,1.21)	0.910824
	cg27068143	13	HTR2A	47471264	rs9534512	13	47473921	A	C	0.406953	0.0489048	0.0346193	0.157759	0.600505	0.0319212	6.009e-79	0.0814395	0.0578125	0.158929	0.346989	20	-0.031873	0.194752	1.08485	0.96863	1.21501	1.085(0.969,1.215)	0.910824
	cg09978860	4	KDR	56023921	rs11936364	4	56019253	T	C	0.484663	0.0483544	0.0342911	0.158505	0.851781	0.0284045	1.42673e-197	0.0567686	0.0403026	0.158965	0.737323	20	-0.0222245	0.135762	1.05841	0.978021	1.14541	1.058(0.978,1.145)	0.910824
	cg23762722	17	CRHR1	43817897	rs112746008	17	44126650	T	C	0.236196	0.0691084	0.0489171	0.157725	-0.61307	0.0371196	2.81058e-61	-0.112725	0.0800818	0.159243	0.309781	20	-0.269685	0.0442353	0.893396	0.76362	1.04523	0.893(0.764,1.045)	0.910824
	cg06411479	4	WFS1	6272229	rs73071607	4	6295853	T	C	0.108384	-0.0748062	0.0526793	0.155599	0.503921	0.0481121	1.13855e-25	-0.148448	0.105495	0.159381	0.655061	20	-0.355218	0.0583222	0.862045	0.70102	1.06006	0.862(0.701,1.06)	0.910824
	cg05281603	11	MIR34C	111384124	rs2187473	11	111383846	T	C	0.155419	0.0864306	0.0608222	0.155306	0.447268	0.0455974	1.02909e-22	0.193241	0.137406	0.159619	0.154527	14	-0.0760748	0.462557	1.21318	0.926747	1.58813	1.213(0.927,1.588)	0.910824
	cg08998192	6	TAP2	32805570	rs2071544	6	32806121	C	T	0.477505	-0.0493451	0.0344634	0.152198	0.236542	0.0316453	7.73326e-14	-0.20861	0.148346	0.159651	0.250831	9	-0.499368	0.0821482	0.811712	0.606914	1.08562	0.812(0.607,1.086)	0.910824
	cg16572876	4	KDR	56024045	rs11936364	4	56019253	T	C	0.484663	0.0483544	0.0342911	0.158505	0.573613	0.0318592	1.79186e-72	0.0842979	0.0599639	0.15978	0.67274	20	-0.0332313	0.201827	1.08795	0.967315	1.22364	1.088(0.967,1.224)	0.910824
	cg07123701	4	KDR	56024434	rs11936364	4	56019253	T	C	0.484663	0.0483544	0.0342911	0.158505	0.54785	0.0313496	2.2026e-68	0.0882621	0.0627955	0.159858	0.660682	19	-0.0348171	0.211341	1.09227	0.965782	1.23533	1.092(0.966,1.235)	0.910824
	cg00972288	10	SIRT1	69644348	rs10823119	10	69689573	T	C	0.348671	-0.0520394	0.036991	0.159484	-0.835509	0.0295962	2.48585e-175	0.0622847	0.0443286	0.160001	0.540888	20	-0.0245994	0.149169	1.06427	0.975701	1.16087	1.064(0.976,1.161)	0.910824
	cg19125767	11	TH	2190111	rs67482701	11	2188436	G	A	0.319018	-0.0584079	0.0407413	0.151678	-0.238185	0.0337269	1.63937e-12	0.245221	0.174538	0.160029	0.901129	20	-0.0968735	0.587315	1.2779	0.907671	1.79915	1.278(0.908,1.799)	0.910824
	cg19784545	4	ANK2	113906536	rs7697332	4	113901228	G	T	0.237219	0.0604783	0.0426313	0.156005	0.390042	0.0384896	3.91555e-24	0.155056	0.110365	0.16004	0.610688	4	-0.0612594	0.371371	1.16772	0.940579	1.44972	1.168(0.941,1.45)	0.910824
	cg01833890	12	CACNA1C	2564063	rs2098027	12	2570803	C	T	0.43047	-0.0518645	0.0358977	0.148517	-0.201013	0.0334016	1.76505e-09	0.258016	0.183658	0.16006	0.585048	6	-0.101954	0.617986	1.29436	0.903071	1.85519	1.294(0.903,1.855)	0.910824
	cg01359532	15	CYP1A2	75045126	rs11072508	15	75062397	C	T	0.397751	-0.051463	0.0363454	0.156793	0.373636	0.0344834	2.34343e-27	-0.137736	0.0981021	0.160318	0.969698	20	-0.330016	0.0545441	0.871329	0.718912	1.05606	0.871(0.719,1.056)	0.910824
	cg15424233	2	YWHAQ	9865477	rs11685771	2	9852110	T	C	0.42229	-0.0524553	0.0371401	0.157843	-0.408039	0.0316246	4.35204e-38	0.128555	0.0915646	0.160326	0.322775	20	-0.0509116	0.308022	1.13718	0.950363	1.36073	1.137(0.95,1.361)	0.910824
	cg09654471	3	ITPR1	4624132	rs73102493	3	4623946	G	A	0.099182	0.0793052	0.0564307	0.159915	-1.5109	0.0487677	9.54806e-211	-0.0524887	0.0373875	0.160345	0.208011	20	-0.125768	0.0207908	0.948865	0.881819	1.02101	0.949(0.882,1.021)	0.910824
	cg00701064	4	WFS1	6280414	rs73071607	4	6295853	T	C	0.108384	-0.0748062	0.0526793	0.155599	-0.438847	0.048384	1.18934e-19	0.170461	0.121503	0.160635	0.797954	20	-0.0676849	0.408607	1.18585	0.934555	1.50472	1.186(0.935,1.505)	0.910824
	cg26012061	7	AGR3	16890775	rs56104377	7	16893129	A	G	0.164622	-0.0749581	0.0525548	0.153786	0.354673	0.0472482	6.06828e-14	-0.211344	0.150829	0.16115	0.210465	7	-0.506969	0.0842808	0.809496	0.602319	1.08793	0.809(0.602,1.088)	0.910824
	cg13910046	12	KRAS	25538221	rs11047990	12	25544576	G	A	0.260736	0.0579003	0.0410376	0.158271	-0.409519	0.0363761	2.11698e-29	-0.141386	0.100993	0.161526	0.45589	15	-0.339332	0.0565603	0.868154	0.712246	1.05819	0.868(0.712,1.058)	0.910824
	cg17086579	11	PITPNM1	67266089	rs11227805	11	67246757	T	C	0.209611	0.0701986	0.0495243	0.15635	-0.357037	0.040413	1.0036e-18	-0.196614	0.140483	0.161646	0.737494	16	-0.471961	0.0787327	0.821508	0.623778	1.08192	0.822(0.624,1.082)	0.910824
	cg20092376	4	KDR	56023423	rs6837695	4	56015840	T	C	0.484663	0.0481585	0.0343036	0.160351	0.559137	0.0314028	6.42707e-71	0.08613	0.0615413	0.161649	0.732271	20	-0.0344909	0.206751	1.08995	0.966097	1.22968	1.09(0.966,1.23)	0.910824
	cg05420994	6	TAP2	32807296	rs2071544	6	32806121	C	T	0.477505	-0.0493451	0.0344634	0.152198	-0.212196	0.0320388	3.51745e-11	0.232545	0.166165	0.161668	0.475426	14	-0.0931384	0.558228	1.26181	0.911067	1.74757	1.262(0.911,1.748)	0.910824
	cg16425829	12	HSPB8	119632544	rs1966544	12	119626122	G	A	0.267894	0.0605063	0.0430294	0.159677	-0.49657	0.0355008	1.85618e-44	-0.121848	0.0870901	0.161781	0.518348	20	-0.292545	0.0488486	0.885283	0.746362	1.05006	0.885(0.746,1.05)	0.910824
	cg12461287	11	GRAMD1B	123430724	rs1290812	11	123416064	A	G	0.246421	0.0561912	0.0397649	0.157631	0.345667	0.035888	5.86747e-22	0.162559	0.11627	0.162078	0.479063	16	-0.0653302	0.390448	1.17652	0.936758	1.47764	1.177(0.937,1.478)	0.910824
	cg05872255	14	PSEN1	73592157	rs7147079	14	73684541	G	A	0.0848671	-0.0914233	0.0633334	0.148873	-0.305382	0.0553224	3.38924e-08	0.299373	0.214365	0.162545	0.666422	5	-0.120782	0.719528	1.34901	0.886227	2.05346	1.349(0.886,2.053)	0.910824
	cg14507310	9	TLR4	121285184	rs7864314	9	121282616	C	T	0.484663	0.0484226	0.034528	0.160791	-0.48662	0.0319802	2.75814e-52	-0.0995081	0.0712555	0.162565	0.465794	20	-0.239169	0.0401527	0.905283	0.787282	1.04097	0.905(0.787,1.041)	0.910824
	cg23065097	2	FKBP1B	24271827	rs1424344	2	24283966	T	C	0.106339	0.0757684	0.053087	0.153508	0.342131	0.0512263	2.40876e-11	0.22146	0.158669	0.162794			-0.0895312	0.532451	1.2479	0.91436	1.7031	1.248(0.914,1.703)	0.910824
	cg12714759	10	SCD	102102351	rs7069475	10	102101280	T	C	0.419223	-0.0504968	0.035381	0.153515	0.219047	0.0339396	1.08916e-10	-0.230529	0.165425	0.163451	0.775119	17	-0.554762	0.093704	0.794113	0.574209	1.09823	0.794(0.574,1.098)	0.910824
	cg03977339	6	HLA-A	29924256	rs114832360	6	29951061	T	C	0.0449898	-0.102241	0.073204	0.162515	-1.344	0.0740926	1.55551e-73	0.0760724	0.0546284	0.163758	0.819251	4	-0.0309993	0.183144	1.07904	0.969476	1.20099	1.079(0.969,1.201)	0.910824
	cg25423002	6	HLA-A	29924299	rs114832360	6	29951061	T	C	0.0449898	-0.102241	0.073204	0.162515	-1.23847	0.0760187	1.13119e-59	0.0825546	0.0593252	0.164056	0.629775	4	-0.0337228	0.198832	1.08606	0.966839	1.21998	1.086(0.967,1.22)	0.910824
	cg01413481	6	HLA-C	31272449	rs9266086	6	31320263	T	C	0.109407	-0.0989744	0.070095	0.157949	0.349539	0.0447582	5.74169e-15	-0.283157	0.203787	0.164688	0.511113	20	-0.68258	0.116266	0.753401	0.505312	1.12329	0.753(0.505,1.123)	0.910824
	cg11270917	2	PDIA6	10975686	rs7568397	2	11020903	A	T	0.0961145	-0.0927933	0.0648068	0.152188	-0.315726	0.055122	1.01761e-08	0.293905	0.211579	0.164802			-0.12079	0.7086	1.34166	0.88622	2.03115	1.342(0.886,2.031)	0.910824
	cg13892386	9	TLR4	120508122	rs17421726	9	120512831	T	C	0.095092	-0.0823247	0.0591337	0.163868	-1.02378	0.0550673	3.76914e-77	0.0804125	0.0579219	0.165048	0.00855963	20	-0.0331144	0.193939	1.08373	0.967428	1.21402	1.084(0.967,1.214)	0.910824
	cg18791773	12	PKP2	33050173	rs35991895	12	33040663	C	G	0.214724	0.0649737	0.0464825	0.162171	-0.458175	0.0406169	1.63977e-29	-0.14181	0.102227	0.165381	0.159693	20	-0.342175	0.0585549	0.867786	0.710224	1.0603	0.868(0.71,1.06)	0.910824
	cg05619024	6	HLA-C	31239411	rs1894743	6	31326794	A	T	0.402863	-0.053131	0.0380953	0.163111	0.409254	0.0313	4.56259e-39	-0.129824	0.0936129	0.165498	0.288043	20	-0.313305	0.0536573	0.87825	0.731027	1.05512	0.878(0.731,1.055)	0.910824
	cg14951292	16	HMOX2	4525986	rs11639998	16	4527109	T	C	0.279141	0.0572884	0.0414024	0.166451	-0.952521	0.0325362	2.11301e-188	-0.060144	0.0435146	0.166924	0.228383	20	-0.145433	0.0251446	0.941629	0.864648	1.02546	0.942(0.865,1.025)	0.910824
	cg08322289	16	HMOX2	4525918	rs11639998	16	4527109	T	C	0.279141	0.0572884	0.0414024	0.166451	-0.846854	0.0334694	3.01272e-141	-0.0676485	0.0489627	0.167084	0.23833	20	-0.163615	0.0283184	0.934589	0.849069	1.02872	0.935(0.849,1.029)	0.910824
	cg11270806	4	PPARGC1A	23892515	rs4568225	4	23898430	T	C	0.301636	-0.0516312	0.036918	0.161952	0.315575	0.0355455	6.8041e-19	-0.16361	0.118429	0.167125	0.642028	17	-0.395731	0.0685108	0.849073	0.673188	1.07091	0.849(0.673,1.071)	0.910824
	cg13730105	9	TLR4	120466837	rs16906010	9	120447687	G	A	0.0501022	-0.0996248	0.0702563	0.156185	-0.386532	0.0640559	1.59666e-09	0.25774	0.186712	0.167459	0.150504	4	-0.108216	0.623696	1.294	0.897434	1.86581	1.294(0.897,1.866)	0.910824
	cg06139259	16	HMOX2	4526053	rs11639998	16	4527109	T	C	0.279141	0.0572884	0.0414024	0.166451	-0.67464	0.0351321	3.49605e-82	-0.084917	0.0615287	0.16755	0.186614	20	-0.205513	0.0356793	0.918589	0.814229	1.03632	0.919(0.814,1.036)	0.910824
	cg03032677	6	CDKN1A	36648794	rs3176336	6	36648816	T	A	0.393661	0.0501442	0.0362648	0.16675	0.68551	0.0315368	9.21108e-105	0.0731487	0.0530089	0.167607	0.540037	20	-0.0307487	0.177046	1.07589	0.969719	1.19369	1.076(0.97,1.194)	0.910824
	cg14988680	1	ATF3	212688417	rs11805307	1	212703592	T	C	0.250511	0.056189	0.0406151	0.166527	0.703027	0.0363288	1.96954e-83	0.0799244	0.0579192	0.167609	0.526791	20	-0.0335972	0.193446	1.08321	0.966961	1.21342	1.083(0.967,1.213)	0.910824
	cg05030953	6	HLA-C	31241000	rs9264486	6	31232482	A	T	0.122699	-0.0721865	0.0522591	0.167181	1.04119	0.0379504	1.03349e-165	-0.0693308	0.0502553	0.167719	0.268873	20	-0.167831	0.0291696	0.933018	0.845497	1.0296	0.933(0.845,1.03)	0.910824
	cg11968804	1	ATF3	212688447	rs11805307	1	212703592	T	C	0.250511	0.056189	0.0406151	0.166527	0.661249	0.0361603	1.05797e-74	0.0849741	0.0615974	0.167738	0.515541	20	-0.0357568	0.205705	1.08869	0.964875	1.22839	1.089(0.965,1.228)	0.910824
	cg01673284	16	HMOX2	4527211	rs11639998	16	4527109	T	C	0.279141	0.0572884	0.0414024	0.166451	-0.622104	0.0358074	1.30737e-67	-0.0920882	0.0667629	0.167793	0.185063	20	-0.222943	0.0387671	0.912025	0.80016	1.03953	0.912(0.8,1.04)	0.910824
	cg08309069	6	HLA-C	31240651	rs9264486	6	31232482	A	T	0.122699	-0.0721865	0.0522591	0.167181	0.82349	0.040246	4.7551e-93	-0.0876592	0.063605	0.168147	0.12895	20	-0.212325	0.0370066	0.916073	0.808702	1.0377	0.916(0.809,1.038)	0.910824
	cg03044407	12	FICD	108908643	rs2287556	12	108956610	C	G	0.170757	-0.0641441	0.0461315	0.164389	0.403892	0.0409609	6.17788e-23	-0.158815	0.115347	0.168562	0.435177	10	-0.384895	0.0672651	0.853154	0.680522	1.06958	0.853(0.681,1.07)	0.910824
	cg02820566	7	FAM20C	187254	rs6976691	7	178277	G	A	0.0674847	-0.0986457	0.0716255	0.168437	-2.35785	0.045988	0	0.0418371	0.0303884	0.168591	0.472121	10	-0.0177242	0.101398	1.04272	0.982432	1.10672	1.043(0.982,1.107)	0.910824
	cg08932654	17	ORMDL3	38084459	rs35557848	17	38087439	T	C	0.208589	0.0561159	0.0405338	0.16623	-0.489854	0.0375039	5.47028e-39	-0.114556	0.0832103	0.168602	0.99229	20	-0.277648	0.0485362	0.891762	0.757563	1.04973	0.892(0.758,1.05)	0.910824
	cg25479708	17	VAMP2	8067759	rs80283923	17	8067755	T	C	0.0480573	-0.117605	0.0848028	0.165502	0.839864	0.0740666	8.37979e-30	-0.140028	0.101724	0.168653	0.271812	20	-0.339407	0.059351	0.869334	0.712192	1.06115	0.869(0.712,1.061)	0.910824
	cg12042135	7	FAM20C	194798	rs6976691	7	178277	G	A	0.0674847	-0.0986457	0.0716255	0.168437	-2.1646	0.0513554	0	0.0455722	0.0331072	0.168665	0.54373	10	-0.0193179	0.110462	1.04663	0.980867	1.11679	1.047(0.981,1.117)	0.910824
	cg26504614	6	MICA	31382102	rs72502587	6	31397631	A	G	0.174847	-0.0907951	0.0641988	0.15728	0.301769	0.0504559	2.21977e-09	-0.300876	0.218608	0.168721	0.196841	8	-0.729348	0.127596	0.74017	0.482223	1.13609	0.74(0.482,1.136)	0.910824
	cg20865618	7	FAM20C	187333	rs6976691	7	178277	G	A	0.0674847	-0.0986457	0.0716255	0.168437	-1.97113	0.0563562	5.16323e-268	0.0500452	0.0363655	0.168767	0.496945	10	-0.0212312	0.121322	1.05132	0.978993	1.12899	1.051(0.979,1.129)	0.910824
	cg12012581	7	FAM20C	194748	rs6976691	7	178277	G	A	0.0674847	-0.0986457	0.0716255	0.168437	-1.66396	0.0606089	6.21513e-166	0.0592837	0.0430994	0.168973			-0.0251911	0.143759	1.06108	0.975124	1.15461	1.061(0.975,1.155)	0.910824
	cg05247640	17	VAMP2	8067776	rs80283923	17	8067755	T	C	0.0480573	-0.117605	0.0848028	0.165502	0.783226	0.075432	2.95692e-25	-0.150154	0.109235	0.169257	0.10786	14	-0.364255	0.0639466	0.860575	0.694714	1.06604	0.861(0.695,1.066)	0.910824
	cg03312984	1	SOAT1	179279856	rs4652409	1	179504641	G	T	0.407975	0.0616578	0.0435054	0.156411	-0.201062	0.0359777	2.2902e-08	-0.306661	0.223227	0.169516	0.176554	14	-0.744186	0.130864	0.7359	0.475121	1.13981	0.736(0.475,1.14)	0.910824
	cg09518720	11	KCNQ1OT1	2721591	rs86392	11	2727185	T	C	0.403885	-0.0502383	0.0354416	0.156338	-0.179546	0.0323896	2.96775e-08	0.279808	0.203747	0.169657	0.984689	9	-0.119536	0.679152	1.32288	0.887332	1.9722	1.323(0.887,1.972)	0.910824
	cg12101586	15	CYP1A1	75019203	rs11072508	15	75062397	C	T	0.397751	-0.051463	0.0363454	0.156793	0.192506	0.0344818	2.36632e-08	-0.267332	0.194779	0.169912	0.750393	11	-0.649099	0.114435	0.765419	0.522516	1.12124	0.765(0.523,1.121)	0.910824
	cg13570982	14	LGALS3	55596240	rs7141706	14	55686601	G	C	0.099182	-0.0870457	0.06156	0.157362	-0.336025	0.0592651	1.42913e-08	0.259045	0.188812	0.17007	0.710693	10	-0.111027	0.629117	1.29569	0.894915	1.87595	1.296(0.895,1.876)	0.910824
	cg10444806	17	ORMDL3	38084428	rs35557848	17	38087439	T	C	0.208589	0.0561159	0.0405338	0.16623	-0.392728	0.0385209	2.08311e-24	-0.142887	0.104158	0.170116	0.922377	13	-0.347037	0.0612627	0.866852	0.706779	1.06318	0.867(0.707,1.063)	0.910824
	cg17519949	19	NOTCH3	15292440	rs1043997	19	15292437	T	C	0.157464	0.0708125	0.0509814	0.164837	0.410585	0.0475283	5.68363e-18	0.172467	0.125763	0.170259	0.134921	7	-0.0740285	0.418962	1.18823	0.928645	1.52038	1.188(0.929,1.52)	0.910824
	cg09782889	6	HSPA1B	31798731	rs1894743	6	31326794	A	T	0.402863	-0.053131	0.0380953	0.163111	0.243946	0.032652	7.95299e-14	-0.217798	0.158861	0.170375	0.698311	20	-0.529166	0.0935696	0.804288	0.589096	1.09809	0.804(0.589,1.098)	0.910824
	cg06545761	16	MAP1LC3B	87441441	rs4294823	16	87421442	A	G	0.435583	0.0489715	0.0353827	0.166343	0.319795	0.0331616	5.23488e-22	0.153134	0.111776	0.170683	0.12182	20	-0.065947	0.372215	1.16548	0.936181	1.45094	1.165(0.936,1.451)	0.910824
	cg15257755	8	SLC39A14	22225668	rs6558040	8	22260263	C	T	0.50818	0.0483592	0.0350755	0.167982	0.378406	0.0323807	1.49992e-31	0.127797	0.0933356	0.17093	0.253974	20	-0.0551408	0.310735	1.13632	0.946352	1.36443	1.136(0.946,1.364)	0.910824
	cg00840332	7	LEP	127881269	rs10249476	7	127877026	T	G	0.371166	-0.04961	0.0353707	0.160745	0.207803	0.0340744	1.0706e-09	-0.238736	0.174656	0.171661	0.954264	7	-0.581062	0.10359	0.787623	0.559304	1.10915	0.788(0.559,1.109)	0.910824
	cg10692870	2	FN1	216300268	rs1250232	2	216306635	C	T	0.233129	-0.0561019	0.0403798	0.164725	-0.277785	0.0371757	7.88581e-14	0.201961	0.147855	0.171956	0.303366	13	-0.0878348	0.491757	1.2238	0.915912	1.63519	1.224(0.916,1.635)	0.910824
	cg00868074	16	MAP1LC3B	87441555	rs4294823	16	87421442	A	G	0.435583	0.0489715	0.0353827	0.166343	0.278146	0.0332307	5.7539e-17	0.176064	0.128937	0.172094	0.100452	20	-0.0766525	0.428781	1.19251	0.926212	1.53538	1.193(0.926,1.535)	0.910824
	cg19751897	1	TXNDC12	52520827	rs115788353	1	52950000	G	A	0.0633947	0.10632	0.0772376	0.168658	0.700384	0.0661192	3.22007e-26	0.151802	0.111206	0.172237	0.235551	16	-0.0661618	0.369766	1.16393	0.935979	1.4474	1.164(0.936,1.447)	0.910824
	cg23697202	6	MAP3K7	91320190	rs72917875	6	91321804	A	G	0.336401	0.0496529	0.0359462	0.167183	-0.297586	0.0339914	2.04565e-18	-0.166852	0.122287	0.172431	0.56596	20	-0.406535	0.0728305	0.846325	0.665954	1.07555	0.846(0.666,1.076)	0.910824
	cg24797456	4	G3BP2	76622044	rs75873797	4	76622022	G	T	0.149284	-0.0666273	0.048898	0.173016	-1.46429	0.0342256	0	0.0455015	0.0334106	0.173233	0.785079	20	-0.0199833	0.110986	1.04655	0.980215	1.11738	1.047(0.98,1.117)	0.910824
	cg00540464	19	CHERP	16655751	rs1020723	19	16727129	G	A	0.0981595	0.0879252	0.0638394	0.168424	-0.488259	0.0544811	3.18858e-19	-0.180079	0.132284	0.173417	0.675006	17	-0.439356	0.0791976	0.835204	0.644452	1.08242	0.835(0.644,1.082)	0.910824
	cg01789501	1	VCAM1	101272300	rs12047382	1	101319255	A	T	0.43047	-0.0488598	0.0349377	0.161968	-0.196717	0.0331367	2.9112e-09	0.248376	0.182466	0.173443	0.729648	4	-0.109257	0.606009	1.28194	0.8965	1.8331	1.282(0.896,1.833)	0.910824
	cg14149680	11	TH	2187632	rs4930043	11	2189983	T	C	0.301636	-0.0555407	0.0407287	0.17267	0.68655	0.0326728	4.99625e-98	-0.0808982	0.0594484	0.173573	0.785387	20	-0.197417	0.0356207	0.922288	0.820848	1.03626	0.922(0.821,1.036)	0.910824
	cg09527270	2	POMC	25390385	rs76645364	2	25393388	G	A	0.206544	-0.0616612	0.045049	0.171075	-0.513813	0.0412381	1.23886e-35	0.120007	0.0882034	0.173649	0.529022	20	-0.0528717	0.292886	1.1275	0.948502	1.34029	1.128(0.949,1.34)	0.910824
	cg15432903	11	KCNJ11	17409602	rs5219	11	17409572	T	C	0.355828	0.0486134	0.0356838	0.173091	-0.805578	0.0302071	1.09219e-156	-0.060346	0.0443536	0.173651	0.636021	20	-0.147279	0.0265871	0.941439	0.863053	1.02694	0.941(0.863,1.027)	0.910824
	cg10394788	9	DAB2IP	124360547	rs2777320	9	124357470	A	G	0.374233	-0.0477934	0.0350231	0.172371	-0.478374	0.0327324	2.26316e-48	0.099908	0.0735312	0.174237	0.0168319	13	-0.0442132	0.244029	1.10507	0.95675	1.27638	1.105(0.957,1.276)	0.910824
	cg13823169	9	TRAF2	139776893	rs10870140	9	139796419	T	C	0.257669	0.0549674	0.0398356	0.167631	-0.27691	0.0364599	3.07993e-14	-0.198503	0.146213	0.174581	0.270396	14	-0.48508	0.0880745	0.819957	0.615648	1.09207	0.82(0.616,1.092)	0.910824
	cg25212351	10	FAS	90751056	rs12775501	10	90750909	T	C	0.391616	0.0494723	0.0360854	0.170382	0.294592	0.0321786	5.43991e-20	0.167935	0.123859	0.175144	0.296238	20	-0.0748286	0.410699	1.18286	0.927902	1.50787	1.183(0.928,1.508)	0.910824
	cg03864215	11	KCNJ11	17408437	rs5219	11	17409572	T	C	0.355828	0.0486134	0.0356838	0.173091	0.449288	0.0324157	1.10352e-43	0.108201	0.0798056	0.175161	0.662789	20	-0.048218	0.26462	1.11427	0.952926	1.30294	1.114(0.953,1.303)	0.910824
	cg26685246	6	TAP2	32805692	rs2071552	6	32806461	G	A	0.465235	-0.046998	0.0344769	0.172828	0.399495	0.0319021	5.62228e-36	-0.117643	0.0868111	0.175364	0.283435	20	-0.287793	0.0525068	0.889013	0.749917	1.05391	0.889(0.75,1.054)	0.910824
	cg10266189	15	B2M	45000293	rs62025997	15	45089174	G	A	0.0869121	-0.0853964	0.0616277	0.165844	-0.378389	0.0582952	8.53211e-11	0.225684	0.166539	0.175371			-0.100732	0.5521	1.25318	0.904175	1.7369	1.253(0.904,1.737)	0.910824
	cg01153817	11	KCNJ11	17409509	rs5219	11	17409572	T	C	0.355828	0.0486134	0.0356838	0.173091	-0.423186	0.0329638	1.00544e-37	-0.114875	0.0847951	0.175503	0.737613	20	-0.281073	0.0513234	0.891478	0.754973	1.05266	0.891(0.755,1.053)	0.910824
	cg05194426	10	CYP2E1	135343193	rs10857768	10	135402703	G	A	0.234151	-0.0598162	0.043495	0.169057	0.309778	0.0402324	1.36361e-14	-0.193094	0.142629	0.175795	0.913555	20	-0.472647	0.0864588	0.824404	0.62335	1.09031	0.824(0.623,1.09)	0.910824
	cg22940798	6	TAP2	32805554	rs2071552	6	32806461	G	A	0.465235	-0.046998	0.0344769	0.172828	0.357948	0.0319222	3.51441e-29	-0.131298	0.0970273	0.175989	0.208183	20	-0.321472	0.0588755	0.876956	0.725081	1.06064	0.877(0.725,1.061)	0.910824
	cg13563634	6	TAP2	32805684	rs2071552	6	32806461	G	A	0.465235	-0.046998	0.0344769	0.172828	0.338374	0.0320777	5.15786e-26	-0.138894	0.102737	0.176398	0.263477	20	-0.340259	0.0624705	0.87032	0.711586	1.06446	0.87(0.712,1.064)	0.910824
	cg11445109	10	CYP2E1	135343248	rs10857768	10	135402703	G	A	0.234151	-0.0598162	0.043495	0.169057	0.293077	0.0403348	3.70005e-13	-0.204097	0.151043	0.176615	0.908546	18	-0.500141	0.0919473	0.815383	0.606445	1.09631	0.815(0.606,1.096)	0.910824
	cg23881368	13	HTR2A	47472343	rs9534513	13	47474138	G	A	0.488753	-0.0469898	0.0347486	0.176286	-0.943884	0.02793	2.36513e-250	0.0497835	0.0368439	0.176632	0.190759	20	-0.0224305	0.121998	1.05104	0.977819	1.12975	1.051(0.978,1.13)	0.910824
	cg18200810	13	HTR2A	47472200	rs9534513	13	47474138	G	A	0.488753	-0.0469898	0.0347486	0.176286	-0.933933	0.0281397	1.54322e-241	0.0503139	0.0372376	0.176645	0.188452	20	-0.0226718	0.1233	1.0516	0.977583	1.13122	1.052(0.978,1.131)	0.910824
	cg05506829	13	HTR2A	47472349	rs9534513	13	47474138	G	A	0.488753	-0.0469898	0.0347486	0.176286	-0.876024	0.0290468	8.16109e-200	0.0536399	0.0397061	0.176721	0.176552	20	-0.0241841	0.131464	1.0551	0.976106	1.1405	1.055(0.976,1.14)	0.910824
	cg09798090	13	HTR2A	47472140	rs9534513	13	47474138	G	A	0.488753	-0.0469898	0.0347486	0.176286	-0.86991	0.0295574	2.19052e-190	0.0540169	0.0399872	0.176742	0.201844	20	-0.024358	0.132392	1.0555	0.975936	1.14156	1.056(0.976,1.142)	0.910824
	cg15692052	13	HTR2A	47472250	rs9534513	13	47474138	G	A	0.488753	-0.0469898	0.0347486	0.176286	-0.743392	0.0310977	2.7158e-126	0.06321	0.046818	0.176977	0.202024	20	-0.0285533	0.154973	1.06525	0.971851	1.16763	1.065(0.972,1.168)	0.910824
	cg10068417	13	DLEU2	50706583	rs790934	13	50697194	A	G	0.0664622	0.0943405	0.0678887	0.16464	0.38146	0.0674806	1.57776e-08	0.247314	0.183269	0.17719			-0.111893	0.606521	1.28058	0.89414	1.83404	1.281(0.894,1.834)	0.910824
	cg01744331	11	KCNQ1OT1	2722358	rs231359	11	2694606	A	C	0.284254	-0.0508324	0.0373763	0.173825	-0.382615	0.0354589	3.82178e-27	0.132855	0.0984593	0.177228	0.992666	20	-0.0601252	0.325835	1.14208	0.941647	1.38519	1.142(0.942,1.385)	0.910824
	cg12854186	6	TAP2	32805398	rs2071552	6	32806461	G	A	0.465235	-0.046998	0.0344769	0.172828	0.305442	0.0323871	4.06273e-21	-0.153869	0.114048	0.177288	0.24044	18	-0.377403	0.0696651	0.857384	0.68564	1.07215	0.857(0.686,1.072)	0.910824
	cg01620540	13	HTR2A	47472064	rs9534513	13	47474138	G	A	0.488753	-0.0469898	0.0347486	0.176286	-0.596564	0.0321703	9.12846e-77	0.0787674	0.0584026	0.177434	0.159257	20	-0.0357017	0.193236	1.08195	0.964928	1.21317	1.082(0.965,1.213)	0.910824
	cg18984983	10	CYP2E1	135342936	rs10857768	10	135402703	G	A	0.234151	-0.0598162	0.043495	0.169057	0.272072	0.0401762	1.27044e-11	-0.219854	0.163129	0.177745	0.956809	15	-0.539587	0.0998788	0.802636	0.582989	1.10504	0.803(0.583,1.105)	0.910824
	cg26887085	6	CNR1	88861706	rs9450898	6	88864063	T	C	0.158487	0.0668063	0.0490867	0.173519	0.381582	0.0408437	9.4097e-21	0.175077	0.129998	0.178055	0.794762	8	-0.0797191	0.429873	1.19134	0.923376	1.53706	1.191(0.923,1.537)	0.910824
	cg23400446	10	CYP2E1	135342560	rs10857768	10	135402703	G	A	0.234151	-0.0598162	0.043495	0.169057	0.266789	0.0401966	3.19918e-11	-0.224208	0.166495	0.178097	0.925764	10	-0.550538	0.102122	0.799149	0.576639	1.10752	0.799(0.577,1.108)	0.910824
	cg05727186	17	CRHR1	43697356	rs62056790	17	43975417	A	G	0.235174	0.061315	0.0452845	0.175737	-0.495264	0.0392465	1.65229e-36	-0.123803	0.0919598	0.178215	0.523734	18	-0.304044	0.0564382	0.883554	0.737828	1.05806	0.884(0.738,1.058)	0.910824
	cg22230640	6	TAP2	32805807	rs2071552	6	32806461	G	A	0.465235	-0.046998	0.0344769	0.172828	0.26933	0.0318662	2.86574e-17	-0.1745	0.129664	0.178373	0.202275	17	-0.428641	0.0796414	0.839877	0.651393	1.0829	0.84(0.651,1.083)	0.910824
	cg17562697	6	MAP3K7	91321801	rs72917863	6	91316513	G	T	0.336401	0.0483874	0.0359378	0.178167	1.03766	0.0277242	1.37217e-306	0.0466312	0.0346559	0.178447	0.639105	20	-0.0212944	0.114557	1.04774	0.978931	1.12138	1.048(0.979,1.121)	0.910824
	cg07439618	3	SCN5A	38648988	rs9871385	3	38641134	C	A	0.355828	0.0480525	0.035436	0.175088	0.322587	0.0326052	4.43186e-23	0.14896	0.110876	0.179118	0.215169	20	-0.068357	0.366277	1.16063	0.933927	1.44235	1.161(0.934,1.442)	0.910824
	cg03321503	6	MAP3K7	91320082	rs72917863	6	91316513	G	T	0.336401	0.0483874	0.0359378	0.178167	-0.636885	0.0328331	8.07486e-84	-0.0759751	0.0565632	0.179211	0.585206	20	-0.186839	0.0348888	0.926839	0.829577	1.0355	0.927(0.83,1.036)	0.910824
	cg03935729	11	CASP12	104405198	rs1893464	11	104505707	A	G	0.0531697	-0.106667	0.0783792	0.173541	-0.491211	0.0591594	1.01366e-16	0.217152	0.161692	0.179274	0.862713	13	-0.0997643	0.534068	1.24253	0.905051	1.70586	1.243(0.905,1.706)	0.910824
	cg10862468	10	CYP2E1	135342218	rs10857768	10	135402703	G	A	0.234151	-0.0598162	0.043495	0.169057	0.24961	0.0404633	6.88121e-10	-0.239639	0.17853	0.179502	0.939326	8	-0.589558	0.11028	0.786912	0.554572	1.11659	0.787(0.555,1.117)	0.910824
	cg08030082	2	POMC	25391839	rs2276597	2	25344464	A	G	0.215746	-0.0588068	0.0433852	0.175271	0.371196	0.0389146	1.44576e-21	-0.158425	0.118054	0.179603	0.575461	20	-0.389811	0.0729608	0.853487	0.677185	1.07569	0.853(0.677,1.076)	0.910824
	cg22159421	11	CAT	34460182	rs508370	11	34488095	T	C	0.40184	0.0487532	0.0353033	0.167285	-0.184767	0.0326566	1.53255e-08	-0.263863	0.196678	0.179727	0.875199	9	-0.649352	0.121626	0.768079	0.522384	1.12933	0.768(0.522,1.129)	0.910824
	cg24530264	10	CYP2E1	135342620	rs10857768	10	135402703	G	A	0.234151	-0.0598162	0.043495	0.169057	0.243872	0.0403693	1.5314e-09	-0.245277	0.182915	0.179942	0.991487	7	-0.60379	0.113236	0.782488	0.546735	1.1199	0.782(0.547,1.12)	0.910824
	cg05700789	16	CREBBP	3999569	rs76013024	16	3980738	C	A	0.0470348	-0.103188	0.0767396	0.17874	1.31403	0.0844221	1.2587e-54	-0.0785275	0.0586177	0.180358	0.631646	20	-0.193418	0.0363632	0.924477	0.824137	1.03703	0.924(0.824,1.037)	0.910824
	cg22509679	12	GABARAPL1	10379548	rs11053803	12	10599662	C	T	0.372188	-0.0493635	0.0362237	0.172964	-0.238109	0.0329839	5.23914e-13	0.207315	0.154818	0.180541	0.149822	20	-0.0961283	0.510758	1.23037	0.908347	1.66655	1.23(0.908,1.667)	0.910824
	cg19413251	10	ITGB1	33265718	rs4298797	10	32711859	G	A	0.102249	0.0857705	0.0632711	0.175225	-0.468244	0.0576905	4.79914e-16	-0.183175	0.136996	0.181196	0.259055	17	-0.451687	0.0853372	0.832622	0.636553	1.08908	0.833(0.637,1.089)	0.910824
	cg24533720	7	EIF2AK1	6099233	rs17136307	7	6064799	T	C	0.4591	-0.049024	0.0355856	0.168316	0.18086	0.0327956	3.49237e-08	-0.271061	0.202804	0.181366	0.901839	5	-0.668557	0.126435	0.76257	0.512448	1.13478	0.763(0.512,1.135)	0.910824
	cg13356366	20	PCNA	5100660	rs36228617	20	5100687	G	A	0.0817996	-0.0845944	0.0630097	0.179414	-0.710227	0.0529174	4.52848e-41	0.119109	0.0891604	0.181584	0.661988	19	-0.0556454	0.293863	1.12649	0.945874	1.3416	1.126(0.946,1.342)	0.910824
	cg08388507	8	TG	133976835	rs2069561	8	133975283	G	A	0.492843	-0.0463119	0.0343056	0.177023	0.288282	0.0317071	9.71974e-20	-0.160648	0.120305	0.181765	0.144694	17	-0.396446	0.0751498	0.851592	0.672707	1.07805	0.852(0.673,1.078)	0.910824
	cg11236311	7	RINT1	105172168	rs34167173	7	105171983	G	C	0.248466	0.053331	0.0399098	0.181455	0.951026	0.0302986	2.909e-216	0.0560773	0.042003	0.18185	0.911008	20	-0.0262486	0.138403	1.05768	0.974093	1.14844	1.058(0.974,1.148)	0.910824
	cg07227024	2	CASP8	202163482	rs9288316	2	202163483	G	A	0.387526	0.0474704	0.0355631	0.181935	1.3502	0.016103	0	0.0351581	0.0263425	0.18199	0.730103	20	-0.0164732	0.0867894	1.03578	0.983662	1.09067	1.036(0.984,1.091)	0.910824
	cg20674635	20	MMP9	44640803	rs3918256	20	44640959	G	A	0.457055	-0.0474769	0.0354934	0.181019	-0.623538	0.0318147	1.57508e-85	0.0761411	0.057055	0.182033	0.451509	20	-0.0356867	0.187969	1.07911	0.964943	1.2068	1.079(0.965,1.207)	0.910824
	cg01934064	17	MAPT	44064242	rs2668668	17	44284641	G	T	0.237219	0.0755872	0.05649	0.180875	0.554709	0.03914	1.35693e-45	0.136265	0.10229	0.182814	0.176393	20	-0.0642234	0.336753	1.14599	0.937795	1.40039	1.146(0.938,1.4)	0.910824
	cg26313301	19	LDLR	11219615	rs892116	19	11221180	A	G	0.424335	-0.0486784	0.0363564	0.180596	-0.398683	0.031767	3.96438e-36	0.122098	0.0917086	0.183068	0.903812	20	-0.0576509	0.301847	1.12986	0.943979	1.35235	1.13(0.944,1.352)	0.910824
	cg10635145	11	BDNF	27742435	rs11030104	11	27684517	G	A	0.220859	0.0561017	0.0420926	0.182591	-0.631369	0.039485	1.498e-57	-0.0888573	0.0668999	0.184108	0.0661194	20	-0.219981	0.0422665	0.914976	0.802534	1.04317	0.915(0.803,1.043)	0.910824
	cg11117266	17	MAPT	43971461	rs112073200	17	44201791	C	G	0.236196	0.0781203	0.0576678	0.175526	-0.263893	0.0391486	1.57522e-11	-0.29603	0.222896	0.184143	0.234248	15	-0.732906	0.140846	0.743765	0.480511	1.15125	0.744(0.481,1.151)	0.910824
	cg27370471	15	PCSK6	101932559	rs3784484	15	101931852	A	G	0.232106	0.0514204	0.0387298	0.184286	1.29913	0.0284447	0	0.0395807	0.0298247	0.184472	0.972809	19	-0.0188757	0.0980371	1.04037	0.981301	1.103	1.04(0.981,1.103)	0.910824
	cg25481635	18	CYB5A	71959313	rs7236071	18	71992294	A	G	0.133947	0.0634768	0.0469076	0.175982	-0.28176	0.0415365	1.17357e-11	-0.225287	0.169761	0.184482	0.559188	19	-0.558019	0.107445	0.798287	0.572342	1.11343	0.798(0.572,1.113)	0.910824
	cg10550816	6	TAP1	32818452	rs2071552	6	32806461	G	A	0.465235	-0.046998	0.0344769	0.172828	-0.18713	0.0322819	6.76132e-09	0.251151	0.189266	0.184517	0.416001	4	-0.11981	0.622112	1.2855	0.887089	1.86286	1.286(0.887,1.863)	0.910824
	cg13167631	2	SLC8A1	40739771	rs10490255	2	40738240	C	T	0.0398773	-0.106148	0.079998	0.184549	-3.04252	0.047582	0	0.0348881	0.026299	0.184643	0.183107	20	-0.0166579	0.0864341	1.0355	0.98348	1.09028	1.036(0.983,1.09)	0.910824
	cg01275932	9	SEC16A	139367244	rs11145760	9	139382594	A	G	0.406953	0.04964	0.0368873	0.178393	0.255249	0.0324501	3.66501e-15	0.194477	0.146615	0.184692	0.434345	20	-0.0928884	0.481842	1.21468	0.911295	1.61905	1.215(0.911,1.619)	0.910824
	cg18865566	20	E2F1	32274387	rs3213141	20	32274380	A	G	0.251534	-0.0558207	0.0409156	0.172476	0.197439	0.0352159	2.0642e-08	-0.282724	0.213279	0.18497	0.339424	6	-0.700751	0.135303	0.753728	0.496213	1.14488	0.754(0.496,1.145)	0.910824
	cg09106728	11	CAT	34464477	rs10488736	11	34489252	T	C	0.305726	-0.0502832	0.0378504	0.184022	-0.632396	0.0331185	2.78238e-81	0.0795122	0.0599971	0.185082	0.795764	20	-0.0380821	0.197107	1.08276	0.962634	1.21787	1.083(0.963,1.218)	0.910824
	cg07599713	6	MAP3K7	91411191	rs282071	6	91297080	C	T	0.315951	-0.0503036	0.0371251	0.175425	-0.225226	0.0356435	2.63506e-10	0.223347	0.168582	0.185218	0.69462	10	-0.107074	0.553768	1.25025	0.898459	1.7398	1.25(0.898,1.74)	0.910824
	cg02747319	2	BOK	242480276	rs78220543	2	242489066	A	G	0.271984	0.0596315	0.0446482	0.181685	-0.399763	0.0391214	1.63837e-24	-0.149167	0.112637	0.185397	0.0932443	20	-0.369936	0.0716015	0.861425	0.690779	1.07423	0.861(0.691,1.074)	0.910824
	cg05927017	18	BCL2	60988155	rs62098660	18	60988146	A	G	0.473415	-0.046422	0.0348978	0.183443	-0.394248	0.0311469	1.01438e-36	0.117748	0.0890048	0.185855	0.71099	20	-0.0567014	0.292197	1.12496	0.944876	1.33937	1.125(0.945,1.339)	0.910824
	cg11668794	6	TAP2	32805877	rs2071552	6	32806461	G	A	0.465235	-0.046998	0.0344769	0.172828	0.170791	0.0313052	4.87877e-08	-0.275178	0.208072	0.185997	0.0685658	6	-0.682999	0.132643	0.759437	0.5051	1.14184	0.759(0.505,1.142)	0.910824
	cg17971003	11	SLN	107582804	rs922756	11	107590219	A	T	0.4182	0.0483864	0.0361351	0.180556	0.257337	0.0331135	7.76505e-15	0.188028	0.142488	0.186969	0.163388	14	-0.0912485	0.467304	1.20687	0.912791	1.59569	1.207(0.913,1.596)	0.910824
	cg09197492	11	KCNQ1	2571399	rs7130209	11	2566400	T	C	0.313906	-0.0504281	0.0381878	0.186658	0.837603	0.0314851	6.24088e-156	-0.0602053	0.0456479	0.1872	0.18681	20	-0.149675	0.0292646	0.941571	0.860988	1.0297	0.942(0.861,1.03)	0.910824
	cg00442205	2	PDIA6	10984512	rs62120316	2	10986130	G	C	0.424335	-0.0470006	0.0356117	0.186899	-0.895227	0.027604	1.00187e-230	0.0525013	0.0398124	0.187264	0.348328	20	-0.025531	0.130534	1.0539	0.974792	1.13944	1.054(0.975,1.139)	0.910824
	cg13621396	4	STIM2	26861261	rs4518229	4	26842217	T	C	0.183027	0.0602567	0.0452787	0.183256	-0.407791	0.041872	2.05606e-22	-0.147764	0.112066	0.187322	0.022055	19	-0.367413	0.0718854	0.862635	0.692523	1.07453	0.863(0.693,1.075)	0.910824
	cg04255879	2	BOK	242480918	rs77985491	2	242487721	A	G	0.274029	0.0579734	0.043431	0.181929	-0.324683	0.0389346	7.48074e-17	-0.178554	0.135467	0.187484	0.00916057	11	-0.444069	0.0869613	0.836479	0.641421	1.09085	0.836(0.641,1.091)	0.910824
	cg03366382	11	INS	2182644	rs689	11	2182224	A	T	0.275051	-0.0553072	0.0418967	0.186807	-0.720071	0.0340297	2.22855e-99	0.076808	0.0582973	0.187663	0.778233	20	-0.0374547	0.191071	1.07983	0.963238	1.21055	1.08(0.963,1.211)	0.910824
	cg23707289	18	BCL2	60988099	rs1801018	18	60985879	C	T	0.473415	-0.0460378	0.03487	0.186745	-0.582736	0.0296123	3.27525e-86	0.0790028	0.0599729	0.187735	0.788827	20	-0.0385441	0.19655	1.08221	0.962189	1.2172	1.082(0.962,1.217)	0.910824
	cg09871133	16	ABCC1	16216108	rs12927675	16	16206170	A	G	0.168712	-0.0697259	0.0523429	0.182828	-0.389714	0.0446045	2.39174e-18	0.178916	0.135863	0.187879	0.563395	4	-0.0873755	0.445207	1.19592	0.916333	1.56081	1.196(0.916,1.561)	0.910824
	cg19797930	2	BOK	242481817	rs76353298	2	242486844	C	T	0.273006	0.0577038	0.0432504	0.182145	-0.319082	0.0390758	3.19506e-16	-0.180843	0.137344	0.187932	0.167446	10	-0.450037	0.0883512	0.834566	0.637604	1.09237	0.835(0.638,1.092)	0.910824
	cg25905215	4	NFKB1	103537858	rs4496586	4	103557311	C	G	0.461145	-0.0460803	0.034475	0.181344	0.237562	0.0324352	2.40341e-13	-0.193971	0.147517	0.188539	0.733047	20	-0.483104	0.0951623	0.823682	0.616865	1.09984	0.824(0.617,1.1)	0.910824
	cg19183733	8	TMEM67	94847404	rs4735240	8	94845671	C	T	0.40593	0.0489473	0.0369697	0.185508	0.345318	0.0315211	6.27857e-28	0.141745	0.107839	0.188705	0.256101	20	-0.0696194	0.353109	1.15228	0.932749	1.42349	1.152(0.933,1.423)	0.910824
	cg23057831	8	ZFAND1	82633454	rs2912812	8	82553311	G	C	0.156442	0.0654249	0.0493482	0.184913	-0.467029	0.0467302	1.61652e-23	-0.140087	0.10659	0.188757	0.0945455	16	-0.349003	0.0688294	0.869283	0.705391	1.07125	0.869(0.705,1.071)	0.910824
	cg11117131	11	SLN	107582818	rs922756	11	107590219	A	T	0.4182	0.0483864	0.0361351	0.180556	0.219326	0.0332493	4.21228e-11	0.220614	0.168115	0.189426	0.0970182	14	-0.108891	0.550119	1.24684	0.896828	1.73346	1.247(0.897,1.733)	0.910824
	cg20146582	3	PDIA5	122785693	rs60704873	3	122781935	G	A	0.0981595	0.0778799	0.0580324	0.179593	0.312725	0.0514935	1.25464e-09	0.249037	0.190047	0.190062	0.587184	4	-0.123455	0.621529	1.28279	0.883861	1.86177	1.283(0.884,1.862)	0.910824
	cg08179530	6	CDKN1A	36648295	rs3176320	6	36646788	G	A	0.337423	0.0496542	0.0370404	0.18007	0.203995	0.0331504	7.57319e-10	0.243409	0.185834	0.190257	0.549067	14	-0.120826	0.607644	1.27559	0.886188	1.8361	1.276(0.886,1.836)	0.910824
	cg21953307	6	EEF1A1	74233640	rs62438400	6	74237769	T	G	0.190184	-0.0573554	0.0436257	0.188606	0.563432	0.0380334	1.18712e-49	-0.101797	0.0777329	0.190342	0.864401	20	-0.254153	0.0505595	0.903213	0.775573	1.05186	0.903(0.776,1.052)	0.910824
	cg10502244	12	COL2A1	48399295	rs11168351	12	48403765	A	G	0.371166	0.0470522	0.0350973	0.180043	-0.20107	0.0336895	2.39684e-09	-0.234009	0.178902	0.190863	0.0447407	20	-0.584657	0.116639	0.791355	0.557297	1.12371	0.791(0.557,1.124)	0.910824
	cg09522027	2	PPP1CB	28974177	rs12475612	2	29030006	G	T	0.41002	0.0460667	0.0351779	0.190354	0.741338	0.0300442	1.98721e-134	0.0621399	0.0475187	0.190977	0.709848	20	-0.0309968	0.155277	1.06411	0.969479	1.16798	1.064(0.969,1.168)	0.910824
	cg10628098	11	SCYL1	65292300	rs11604369	11	65280407	C	G	0.0674847	-0.0972766	0.0740503	0.188962	0.796717	0.0603546	8.70308e-40	-0.122097	0.0934034	0.191145	0.992162	20	-0.305168	0.0609737	0.885063	0.737	1.06287	0.885(0.737,1.063)	0.910824
	cg13025668	2	POMC	25391656	rs2083116	2	25347469	T	C	0.216769	-0.0576199	0.04331	0.183385	0.270094	0.0400777	1.59191e-11	-0.213333	0.163446	0.19182	0.593125	17	-0.533687	0.107021	0.807887	0.586439	1.11296	0.808(0.586,1.113)	0.910824
	cg05578595	3	ADIPOQ	186542905	rs34587333	3	186545784	A	G	0.48364	0.047742	0.0363977	0.189629	0.40795	0.032185	8.12097e-37	0.117029	0.0896973	0.191992	0.676006	14	-0.0587777	0.292836	1.12415	0.942916	1.34022	1.124(0.943,1.34)	0.910824
	cg26241416	6	HSP90AB1	44215763	rs324128	6	44212311	T	C	0.312883	-0.0487595	0.0373452	0.191675	-0.928121	0.0279218	2.84603e-242	0.0525357	0.0402685	0.192017	0.0819213	20	-0.0263906	0.131462	1.05394	0.973955	1.14049	1.054(0.974,1.14)	0.910824
	cg20387815	2	POMC	25391666	rs2083116	2	25347469	T	C	0.216769	-0.0576199	0.04331	0.183385	0.258153	0.0394575	6.04773e-11	-0.2232	0.171202	0.192328	0.447694	13	-0.558756	0.112356	0.799955	0.57192	1.11891	0.8(0.572,1.119)	0.910824
	cg01999046	9	TRAF2	139779708	rs10747039	9	139780499	G	A	0.254601	0.0526487	0.0402527	0.190889	0.497721	0.0354782	1.037e-44	0.10578	0.0812248	0.192812	0.192565	20	-0.0534206	0.264981	1.11158	0.947981	1.30341	1.112(0.948,1.303)	0.910824
	cg15993458	6	TAP1	32820691	rs36229526	6	32820656	T	G	0.0725971	0.0874277	0.0663595	0.187676	0.553941	0.0650354	1.62995e-17	0.157829	0.12122	0.192915	0.305136	4	-0.0797622	0.39542	1.17097	0.923336	1.48501	1.171(0.923,1.485)	0.910824
	cg23558764	8	UBXN8	30635400	rs7017734	8	30635443	T	C	0.120654	-0.06659	0.0509768	0.191457	-0.713864	0.0469393	3.11846e-52	0.0932811	0.0716726	0.193091	0.842395	20	-0.0471972	0.233759	1.09777	0.953899	1.26334	1.098(0.954,1.263)	0.910824
	cg23757825	7	EGFR	55092271	rs58711464	7	55092322	C	T	0.185072	-0.0598822	0.0454567	0.187722	-0.339636	0.0409563	1.10758e-16	0.176313	0.135518	0.193247	0.431889	15	-0.0893023	0.441928	1.19281	0.914569	1.5557	1.193(0.915,1.556)	0.910824
	cg02749887	11	INS	2182540	rs3842753	11	2181060	T	G	0.275051	-0.054291	0.0416508	0.192411	-0.687322	0.0340625	1.52056e-90	0.0789891	0.060725	0.193338	0.570063	20	-0.0400319	0.19801	1.08219	0.960759	1.21897	1.082(0.961,1.219)	0.910824
	cg24338752	11	INS	2182672	rs3842753	11	2181060	T	G	0.275051	-0.054291	0.0416508	0.192411	-0.651883	0.0343291	2.09391e-80	0.0832833	0.0640434	0.193457	0.51547	20	-0.0422418	0.208808	1.08685	0.958638	1.23221	1.087(0.959,1.232)	0.910824
	cg21574853	11	INS	2182573	rs3842753	11	2181060	T	G	0.275051	-0.054291	0.0416508	0.192411	-0.637632	0.0350391	5.38048e-74	0.0851447	0.0654884	0.19355	0.781287	20	-0.0432126	0.213502	1.08887	0.957708	1.23801	1.089(0.958,1.238)	0.910824
	cg23685965	18	CYB5A	71958448	rs1558949	18	71953358	G	A	0.153374	-0.0629449	0.0482299	0.191859	-0.665274	0.0452617	6.60054e-49	0.094615	0.0727816	0.193606	0.811468	17	-0.0480369	0.237267	1.09924	0.953099	1.26778	1.099(0.953,1.268)	0.910824
	cg12449404	2	SLC8A1	40437698	rs13414508	2	40466268	T	C	0.121677	-0.0679159	0.0513737	0.186169	0.326974	0.0460957	1.30887e-12	-0.20771	0.159824	0.193732	0.914093	20	-0.520965	0.105545	0.812443	0.593947	1.11132	0.812(0.594,1.111)	0.910824
	cg25336198	11	INS	2182618	rs3842753	11	2181060	T	G	0.275051	-0.054291	0.0416508	0.192411	-0.564756	0.0350481	2.04258e-58	0.0961317	0.073991	0.193863	0.888189	20	-0.0488907	0.241154	1.1009	0.952285	1.27272	1.101(0.952,1.273)	0.910824
	cg10381200	19	INSR	7198589	rs891087	19	7184518	A	G	0.0725971	0.0802523	0.0606531	0.18579	-0.369046	0.0559747	4.30772e-11	-0.217459	0.167628	0.194538	0.52919	8	-0.54601	0.111092	0.804561	0.579257	1.1175	0.805(0.579,1.117)	0.910824
	cg13403689	6	TAP1	32820641	rs36229526	6	32820656	T	G	0.0725971	0.0874277	0.0663595	0.187676	0.483405	0.0652556	1.28341e-13	0.180858	0.139429	0.194586	0.440443	4	-0.0924228	0.454139	1.19825	0.91172	1.57482	1.198(0.912,1.575)	0.910824
	cg08454507	17	RPTOR	78755406	rs35926934	17	78720002	A	G	0.109407	-0.0691039	0.053085	0.192998	0.744285	0.0484599	3.09346e-53	-0.092846	0.0715792	0.194594	0.989774	20	-0.233141	0.0474492	0.911334	0.792042	1.04859	0.911(0.792,1.049)	0.910824
	cg16015295	17	RPTOR	78793479	rs35926934	17	78720002	A	G	0.109407	-0.0691039	0.053085	0.192998	0.727753	0.0480809	9.3715e-52	-0.0949551	0.073213	0.194641	0.721478	20	-0.238453	0.0485424	0.909414	0.787846	1.04974	0.909(0.788,1.05)	0.910824
	cg26622211	7	OSBPL3	25021720	rs57509322	7	24991002	T	C	0.173824	0.059376	0.0455812	0.192696	0.594834	0.0439648	1.04319e-41	0.0998195	0.0769827	0.194752	0.101972	20	-0.0510666	0.250706	1.10497	0.950215	1.28493	1.105(0.95,1.285)	0.910824
	cg15230985	17	RPTOR	78753887	rs35926934	17	78720002	A	G	0.109407	-0.0691039	0.053085	0.192998	0.691202	0.0487043	1.02986e-45	-0.0999764	0.0771234	0.194866	0.78222	20	-0.251138	0.0511855	0.904859	0.777915	1.05252	0.905(0.778,1.053)	0.910824
	cg23390871	11	INS	2183708	rs689	11	2182224	A	T	0.275051	-0.0553072	0.0418967	0.186807	0.242166	0.0353766	7.62823e-12	-0.228386	0.176196	0.194906	0.372791	15	-0.57373	0.116958	0.795817	0.56342	1.12407	0.796(0.563,1.124)	0.910824
	cg07544653	18	CYB5A	71959407	rs7239564	18	71967031	T	C	0.114519	0.06831	0.0520431	0.189329	0.362862	0.0448893	6.29386e-16	0.188253	0.145302	0.195114	0.458267	20	-0.0965389	0.473045	1.20714	0.907975	1.60487	1.207(0.908,1.605)	0.910824
	cg08180187	4	SOD3	24796689	rs1089070	4	24787903	T	C	0.0552147	0.0980041	0.0744782	0.188215	0.514162	0.070008	2.06791e-13	0.190609	0.14716	0.195233	0.41909	11	-0.0978246	0.479043	1.20999	0.906808	1.61453	1.21(0.907,1.615)	0.910824
	cg14003978	9	ADAMTSL1	18862115	rs4977273	9	18977126	T	A	0.234151	0.0541561	0.0415207	0.192125	0.397662	0.0389124	1.62296e-24	0.136186	0.105259	0.195727	0.2627	20	-0.0701216	0.342494	1.1459	0.93228	1.40846	1.146(0.932,1.408)	0.910824
	cg14245898	19	ILVBL	15248535	rs10407541	19	15250674	G	A	0.134969	0.0705002	0.0544917	0.195742	-1.74827	0.0259168	0	-0.0403257	0.0311746	0.195824	0.888165	20	-0.101428	0.0207765	0.960477	0.903546	1.02099	0.96(0.904,1.021)	0.910824
	cg03715070	17	NFE2L1	46124684	rs7221720	17	46168892	G	A	0.110429	0.0702791	0.0541622	0.194436	0.779531	0.0503549	4.68119e-54	0.0901556	0.0697241	0.195999	0.827159	20	-0.0465036	0.226815	1.09434	0.954561	1.2546	1.094(0.955,1.255)	0.910824
	cg17397004	22	KDELR3	38863644	rs7291841	22	38831661	G	A	0.466258	0.0453881	0.0345813	0.189349	-0.249931	0.0338217	1.472e-13	-0.181603	0.140529	0.19626	0.907051	12	-0.45704	0.0938338	0.833932	0.633155	1.09838	0.834(0.633,1.098)	0.910824
	cg11003009	5	HMGCR	74632112	rs10515197	5	74670454	T	C	0.150307	-0.0615481	0.0467652	0.188137	-0.308251	0.0460068	2.08247e-11	0.199669	0.15461	0.196554	0.988976	6	-0.103367	0.502705	1.221	0.901796	1.65319	1.221(0.902,1.653)	0.910824
	cg20533982	7	ESYT2	158533927	rs34277519	7	158533985	C	A	0.179959	-0.0587848	0.045038	0.191815	0.368077	0.042648	6.10359e-18	-0.159708	0.123752	0.196858	0.960355	20	-0.402262	0.0828459	0.852393	0.668806	1.08637	0.852(0.669,1.086)	0.910824
	cg15748006	2	YWHAQ	9772375	rs73913149	2	9781822	T	C	0.0705521	0.110504	0.084431	0.190601	0.553542	0.0715213	9.97776e-15	0.19963	0.154694	0.196883	0.519034	4	-0.10357	0.50283	1.22095	0.901613	1.65339	1.221(0.902,1.653)	0.910824
	cg26312951	21	MX1	42797847	rs459482	21	42793791	G	C	0.404908	0.0458781	0.0354105	0.195111	0.429281	0.0321869	1.40776e-40	0.106872	0.0828762	0.197211	0.0408843	20	-0.0555654	0.269309	1.11279	0.94595	1.30906	1.113(0.946,1.309)	0.910824
	cg22386583	17	RPTOR	78753756	rs35926934	17	78720002	A	G	0.109407	-0.0691039	0.053085	0.192998	0.464616	0.0495531	6.84441e-21	-0.148733	0.115352	0.197262	0.731434	20	-0.374823	0.0773569	0.861799	0.687411	1.08043	0.862(0.687,1.08)	0.910824
	cg01559770	7	KCNH2	150644459	rs2072411	7	150648986	C	G	0.336401	-0.0518183	0.039712	0.191943	0.281125	0.0335446	5.26464e-17	-0.184325	0.142963	0.197288	0.577575	20	-0.464532	0.0958825	0.831665	0.628429	1.10063	0.832(0.628,1.101)	0.910824
	cg06701500	2	YWHAQ	9771671	rs73913149	2	9781822	T	C	0.0705521	0.110504	0.084431	0.190601	0.525675	0.0715	1.95123e-13	0.210213	0.16314	0.197556	0.431584	3	-0.109541	0.529967	1.23394	0.896245	1.69888	1.234(0.896,1.699)	0.910824
	cg26651303	7	ESYT2	158533204	rs2305476	7	158536376	C	A	0.170757	-0.0582803	0.0452449	0.197708	1.44701	0.0316874	0	-0.0402764	0.0312803	0.197886	0.788466	20	-0.101586	0.021033	0.960524	0.903404	1.02126	0.961(0.903,1.021)	0.910824
	cg13428009	9	SEC16A	139383171	rs4582662	9	139365520	C	G	0.122699	0.071788	0.0554891	0.195759	0.545988	0.0440391	2.68596e-35	0.131483	0.102183	0.198184	0.825747	20	-0.0687957	0.331762	1.14052	0.933517	1.39342	1.141(0.934,1.393)	0.910824
	cg25299676	7	MET	116312739	rs38838	7	116307210	C	T	0.149284	0.0585206	0.0453513	0.196917	0.707249	0.041473	3.3077e-65	0.082744	0.0643068	0.198196	0.505319	12	-0.0432973	0.208785	1.08626	0.957627	1.23218	1.086(0.958,1.232)	0.910824
	cg05471090	18	CYB5A	71959795	rs7239564	18	71967031	T	C	0.114519	0.06831	0.0520431	0.189329	0.297474	0.0457542	7.94864e-11	0.229633	0.17848	0.198231	0.591907	20	-0.120188	0.579454	1.25814	0.886754	1.78506	1.258(0.887,1.785)	0.910824
	cg09575421	11	KCNJ11	17415270	rs2074310	11	17421886	T	C	0.353783	0.0467196	0.0361693	0.196464	0.402905	0.0332057	7.00987e-34	0.115957	0.0902785	0.19899	0.78586	20	-0.0609889	0.292903	1.12295	0.940834	1.34031	1.123(0.941,1.34)	0.910824
	cg09968749	6	TAP1	32820966	rs17213812	6	32815516	T	C	0.0705521	0.0961414	0.0737572	0.192409	-0.535532	0.0715287	7.04896e-14	-0.179525	0.139799	0.199083	0.655618	4	-0.453531	0.094481	0.835667	0.635381	1.09909	0.836(0.635,1.099)	0.910824
	cg19458497	11	ATL3	63403371	rs3017733	11	63554910	T	C	0.158487	0.0655075	0.0503775	0.193487	-0.357455	0.0454745	3.82425e-15	-0.183261	0.142849	0.199528	0.827185	18	-0.463245	0.096723	0.832551	0.629238	1.10156	0.833(0.629,1.102)	0.910824
	cg08329754	17	RPTOR	78797015	rs35926934	17	78720002	A	G	0.109407	-0.0691039	0.053085	0.192998	0.373368	0.0498061	6.55794e-14	-0.185083	0.144306	0.199644	0.549007	17	-0.467923	0.0977568	0.831035	0.626302	1.10269	0.831(0.626,1.103)	0.910824
	cg06111140	7	ESYT2	158575756	rs35865957	7	158528357	T	C	0.105317	-0.0713882	0.0545208	0.190407	-0.336745	0.0528724	1.90248e-10	0.211995	0.165291	0.199649	0.967195	20	-0.111975	0.535965	1.23614	0.894066	1.7091	1.236(0.894,1.709)	0.910824
	cg07185664	17	INPP5K	1412950	rs2302456	17	1374503	T	C	0.0705521	0.096434	0.0745929	0.196079	-0.571815	0.0586299	1.7918e-22	-0.168645	0.13159	0.199985	0.449229	20	-0.426561	0.0892714	0.844809	0.65275	1.09338	0.845(0.653,1.093)	0.910824
	cg11024682	17	SREBF1	17730094	rs11658944	17	17425279	T	C	0.0603272	-0.111341	0.0850661	0.190578	0.426761	0.0680506	3.58211e-10	-0.260897	0.203625	0.200102	0.203996	17	-0.660002	0.138208	0.77036	0.51685	1.14821	0.77(0.517,1.148)	0.910824
	cg02479022	8	SLC39A14	22250005	rs11136017	8	22238030	G	T	0.503067	0.0455268	0.0348727	0.191717	-0.218234	0.0327758	2.76847e-11	-0.208615	0.162837	0.200151	0.167128	20	-0.527776	0.110546	0.811708	0.589916	1.11689	0.812(0.59,1.117)	0.910824
	cg11174089	13	UGGT2	96447007	rs9556529	13	96856278	G	A	0.0715746	0.0959747	0.0747075	0.198907	-1.21195	0.0748581	5.93678e-59	-0.0791903	0.0618362	0.200318	0.655754	9	-0.200389	0.0420087	0.923864	0.818412	1.0429	0.924(0.818,1.043)	0.910824
	cg01926269	2	POMC	25391670	rs13402232	2	25433545	C	T	0.198364	-0.0590689	0.0455344	0.194549	0.33702	0.0419819	9.92735e-16	-0.175268	0.136862	0.200325	0.606931	15	-0.443518	0.0929815	0.839232	0.641775	1.09744	0.839(0.642,1.097)	0.910824
	cg06655861	16	JPH3	87657992	rs7198904	16	87666823	A	G	0.114519	0.0742382	0.0569107	0.192074	0.326305	0.0495762	4.64513e-11	0.227512	0.177802	0.200693	0.87181	11	-0.12098	0.576004	1.25547	0.886052	1.77892	1.255(0.886,1.779)	0.910824
	cg01133262	22	KDELR3	38863905	rs7291841	22	38831661	G	A	0.466258	0.0453881	0.0345813	0.189349	-0.19238	0.0335316	9.62106e-09	-0.23593	0.184399	0.200737	0.994407	8	-0.597352	0.125492	0.789836	0.550267	1.13371	0.79(0.55,1.134)	0.910824
	cg22680073	2	PROC	128162581	rs41280570	2	128176230	T	C	0.305726	0.0480386	0.0373871	0.198828	0.464954	0.0340863	2.3005e-42	0.103319	0.0807663	0.200815	0.034259	20	-0.0549829	0.261621	1.10885	0.946501	1.29903	1.109(0.947,1.299)	0.910824
	cg16179182	5	VTRNA1-1	140090404	rs2563284	5	140126184	A	G	0.200409	-0.0567438	0.0438296	0.195443	0.293434	0.0372583	3.38924e-15	-0.193379	0.151373	0.201426	0.183191	20	-0.49007	0.103312	0.82417	0.612583	1.10884	0.824(0.613,1.109)	0.910824
	cg15977719	7	OSBPL3	25021503	rs57509322	7	24991002	T	C	0.173824	0.059376	0.0455812	0.192696	0.283516	0.0447171	2.29455e-10	0.209427	0.164129	0.201959	0.74677	7	-0.112266	0.53112	1.23297	0.893807	1.70084	1.233(0.894,1.701)	0.910824
	cg21243064	9	SEC16A	139371233	rs10870069	9	139372452	G	A	0.122699	0.0712354	0.0558646	0.202259	-1.79857	0.0218527	0	-0.0396067	0.0310643	0.202313	0.716505	20	-0.100493	0.0212793	0.961167	0.904392	1.02151	0.961(0.904,1.022)	0.910824
	cg27551440	17	RPTOR	78617745	rs12936815	17	78591874	A	G	0.439673	-0.0453533	0.0347221	0.191492	0.175327	0.0315037	2.61723e-08	-0.258678	0.203423	0.203506	0.687488	9	-0.657387	0.140031	0.772072	0.518204	1.15031	0.772(0.518,1.15)	0.910824
	cg20473595	17	ATP2A3	3848169	rs740793	17	3846353	G	A	0.464213	0.0444601	0.0348321	0.20181	0.469452	0.0327525	1.35498e-46	0.0947064	0.074491	0.203593	0.509513	20	-0.051296	0.240709	1.09934	0.949997	1.27215	1.099(0.95,1.272)	0.910824
	cg16151082	8	PLEKHF2	96145483	rs10109640	8	96155426	T	C	0.0521472	-0.0918559	0.0717316	0.200351	-0.810841	0.0766175	3.57406e-26	0.113285	0.0891109	0.20363	0.700611	9	-0.0613724	0.287942	1.11995	0.940473	1.33368	1.12(0.94,1.334)	0.910824
	cg24627299	7	MET	116311496	rs38840	7	116312986	T	C	0.149284	0.0579807	0.0453398	0.200966	0.473495	0.0425909	1.0338e-28	0.122453	0.0963869	0.203932	0.838508	6	-0.0664653	0.311371	1.13027	0.935695	1.3653	1.13(0.936,1.365)	0.910824
	cg02228913	17	MAPT	44058016	rs112572874	17	44072984	G	A	0.236196	0.0557698	0.043895	0.203897	-1.38556	0.0267803	0	-0.0402507	0.0316899	0.204034	0.252222	20	-0.102363	0.0218615	0.960549	0.902702	1.0221	0.961(0.903,1.022)	0.910824
	cg16520312	17	MAPT	43971471	rs113790915	17	43810782	C	G	0.235174	0.0573885	0.0450634	0.202839	-0.593264	0.038115	1.25662e-54	-0.0967334	0.0762122	0.204347	0.26041	20	-0.246109	0.0526425	0.907798	0.781837	1.05405	0.908(0.782,1.054)	0.910824
	cg13974409	11	SCYL1	65292307	rs1194337	11	65259471	T	C	0.0685072	-0.0923128	0.0719864	0.199715	0.518133	0.0595591	3.33419e-18	-0.178164	0.140436	0.204564	0.983145	18	-0.453419	0.0970906	0.836805	0.635452	1.10196	0.837(0.635,1.102)	0.910824
	cg04539240	16	JPH3	87651957	rs75338644	16	87668646	G	C	0.105317	0.0775354	0.0596226	0.193451	0.300922	0.0527635	1.17566e-08	0.257659	0.203218	0.204836	0.958942	8	-0.140648	0.655966	1.2939	0.868795	1.927	1.294(0.869,1.927)	0.910824
	cg00115654	9	ADAMTS13	136294920	rs3118667	9	136291063	C	T	0.490798	0.0476576	0.0375082	0.203873	0.58943	0.0313625	8.43671e-79	0.0808538	0.0637799	0.204905	0.544422	20	-0.0441548	0.205862	1.08421	0.956806	1.22858	1.084(0.957,1.229)	0.910824
	cg04295549	17	RPTOR	78795669	rs35926934	17	78720002	A	G	0.109407	-0.0691039	0.053085	0.192998	-0.277012	0.0497739	2.61548e-08	0.249462	0.196807	0.20496	0.920403	8	-0.13628	0.635204	1.28333	0.872599	1.88741	1.283(0.873,1.887)	0.910824
	cg23303369	20	MMP9	44641161	rs3918253	20	44639511	C	T	0.458078	-0.0450413	0.0354906	0.204403	-0.752876	0.0305352	3.17326e-134	0.0598256	0.0472024	0.205002	0.510158	20	-0.0326911	0.152342	1.06165	0.967837	1.16456	1.062(0.968,1.165)	0.910824
	cg16054184	10	KCNMA1	78944582	rs61867042	10	78936202	T	C	0.0541922	0.094538	0.0745511	0.204763	-1.58824	0.0585607	5.52848e-162	-0.0595238	0.0469907	0.205258	0.301437	20	-0.151626	0.032578	0.942213	0.85931	1.03311	0.942(0.859,1.033)	0.910824
	cg16817229	21	MX1	42798199	rs459482	21	42793791	G	C	0.404908	0.0458781	0.0354105	0.195111	-0.194432	0.0329061	3.44846e-09	-0.23596	0.18645	0.205677			-0.601402	0.129482	0.789812	0.548043	1.13824	0.79(0.548,1.138)	0.910824
	cg10358623	11	MALAT1	65244146	rs7114809	11	65251444	G	A	0.322086	-0.0492927	0.0382048	0.196974	-0.221148	0.0342479	1.06606e-10	0.222895	0.176172	0.205795	0.901082	9	-0.122402	0.568192	1.24969	0.884793	1.76507	1.25(0.885,1.765)	0.910824
	cg22937444	11	KCNJ11	17411766	rs2074314	11	17411821	C	T	0.351738	0.0467232	0.0359959	0.194282	0.193855	0.0346314	2.17265e-08	0.241022	0.190612	0.206064	0.364454	5	-0.132578	0.614622	1.27255	0.875835	1.84896	1.273(0.876,1.849)	0.910824
	cg04145601	20	MMP9	44641469	rs3918253	20	44639511	C	T	0.458078	-0.0450413	0.0354906	0.204403	-0.469841	0.0327703	1.27724e-46	0.0958649	0.0758327	0.206172	0.307475	20	-0.0527672	0.244497	1.10061	0.948601	1.27698	1.101(0.949,1.277)	0.910824
	cg07898303	13	LACC1	44454458	rs17571812	13	44472462	A	G	0.164622	-0.0599825	0.0465396	0.197451	0.274677	0.0424763	1.00232e-10	-0.218374	0.172766	0.206235	0.298112	13	-0.556995	0.120247	0.803825	0.572928	1.12778	0.804(0.573,1.128)	0.910824
	cg26811159	11	NOX4	89223981	rs7925520	11	89214243	C	G	0.328221	-0.048081	0.037905	0.204634	-0.419134	0.035065	6.25684e-33	0.114715	0.0909444	0.207174	0.626115	20	-0.063536	0.292966	1.12155	0.93844	1.3404	1.122(0.938,1.34)	0.910824
	cg01397495	2	UBXN4	136496804	rs62168847	2	136496928	C	T	0.146217	-0.0687626	0.0545249	0.207264	-2.71777	0.0433651	0	0.0253011	0.0200664	0.207356	0.120007	20	-0.014029	0.0646312	1.02562	0.986069	1.06677	1.026(0.986,1.067)	0.910824
	cg20559215	6	MAPK13	36076933	rs3804452	6	36076934	A	G	0.116564	0.0689604	0.0546765	0.207221	-1.80927	0.0375894	0	-0.0381151	0.0302306	0.207376	0.982604	20	-0.0973671	0.0211369	0.962602	0.907223	1.02136	0.963(0.907,1.021)	0.910824
	cg19154116	6	CYP21A2	32005786	rs389512	6	31947594	C	G	0.140082	0.068508	0.053553	0.200806	0.360949	0.0484466	9.3027e-14	0.1898	0.150538	0.207378	0.610725	11	-0.105254	0.484854	1.20901	0.900095	1.62394	1.209(0.9,1.624)	0.910824
	cg24594956	15	PARP16	65592973	rs11637155	15	65589976	T	C	0.132924	-0.0706139	0.0559209	0.20668	0.939614	0.0458153	1.79932e-93	-0.075152	0.0596275	0.20754	0.72957	20	-0.192022	0.0417179	0.927602	0.825289	1.0426	0.928(0.825,1.043)	0.910824
	cg13429614	6	HLA-C	31276667	rs2523612	6	31321123	G	T	0.112474	-0.0695091	0.0544384	0.201659	-0.31761	0.0416125	2.30118e-14	0.218851	0.173782	0.207908	0.34124	20	-0.121762	0.559464	1.24465	0.885359	1.74973	1.245(0.885,1.75)	0.910824
	cg18807011	1	EDEM3	184633572	rs2024765	1	184653541	C	T	0.476483	0.044105	0.0349369	0.206798	0.527325	0.0319025	2.25789e-61	0.0836391	0.066446	0.20812	0.800564	20	-0.0465951	0.213873	1.08724	0.954474	1.23847	1.087(0.954,1.238)	0.910824
	cg20255370	15	EIF2AK4	40268687	rs12900686	15	40260708	T	C	0.328221	-0.0466499	0.0370139	0.207549	-0.649605	0.0319804	9.94908e-92	0.0718127	0.0570887	0.208423	0.0547527	20	-0.0400812	0.183707	1.07445	0.960711	1.20166	1.074(0.961,1.202)	0.910824
	cg11672879	2	LPIN1	11903643	rs72773997	2	11906387	A	C	0.134969	0.0623215	0.0492734	0.205939	0.537726	0.0451906	1.19671e-32	0.115898	0.092149	0.208491	0.265229	20	-0.064714	0.29651	1.12288	0.937335	1.34516	1.123(0.937,1.345)	0.910824
	cg09752223	19	NOTCH3	15281200	rs7249331	19	15266863	C	T	0.237219	0.0537396	0.0420847	0.201624	0.276743	0.03808	3.66463e-13	0.194186	0.154401	0.20851	0.958854	10	-0.10844	0.496812	1.21432	0.897233	1.64347	1.214(0.897,1.643)	0.910824
	cg04837898	3	SACM1L	45731254	rs4682797	3	45731275	G	A	0.250511	-0.0487953	0.0385651	0.205774	0.417817	0.0364147	1.78547e-30	-0.116786	0.0928609	0.208519	0.0186703	20	-0.298793	0.0652214	0.889776	0.741713	1.0674	0.89(0.742,1.067)	0.910824
	cg02962597	12	NOS1	117799749	rs693534	12	117784718	A	G	0.373211	0.0447654	0.0354507	0.206679	0.473846	0.0340014	3.82408e-44	0.0944725	0.0751213	0.208537	0.16023	20	-0.0527652	0.24171	1.09908	0.948603	1.27343	1.099(0.949,1.273)	0.910824
	cg18766864	22	KDELR3	38863605	rs4821788	22	38848204	A	G	0.464213	0.0440665	0.0345438	0.202072	-0.247947	0.0336698	1.78363e-13	-0.177725	0.141394	0.208771	0.66749	7	-0.454857	0.0994072	0.837173	0.634539	1.10452	0.837(0.635,1.105)	0.910824
	cg24806066	1	EDEM3	184633039	rs2024765	1	184653541	C	T	0.476483	0.044105	0.0349369	0.206798	0.388957	0.0319704	4.70713e-34	0.113393	0.0903043	0.209233	0.634606	12	-0.0636034	0.290389	1.12007	0.938377	1.33695	1.12(0.938,1.337)	0.910824
	cg16639595	7	SRI	87856984	rs74552510	7	88139962	A	G	0.0787321	0.0907758	0.0719495	0.207071	-0.85683	0.0664375	4.69264e-38	-0.105944	0.0843726	0.209237	0.849741	20	-0.271314	0.0594263	0.899475	0.762377	1.06123	0.899(0.762,1.061)	0.910824
	cg19679003	15	PCSK6	102035794	rs62027253	15	102043820	T	C	0.142127	0.0687429	0.0544732	0.206964	-0.55049	0.0466432	3.80451e-32	-0.124876	0.0995181	0.20955	0.730265	20	-0.319931	0.0701795	0.882606	0.726199	1.0727	0.883(0.726,1.073)	0.910824
	cg23583739	22	KDELR3	38863908	rs4821788	22	38848204	A	G	0.464213	0.0440665	0.0345438	0.202072	-0.232303	0.0336149	4.82201e-12	-0.189694	0.151214	0.209669	0.999547	11	-0.486073	0.106685	0.827212	0.615037	1.11258	0.827(0.615,1.113)	0.910824
	cg18996202	6	HLA-B	31324565	rs2523612	6	31321123	G	T	0.112474	-0.0695091	0.0544384	0.201659	-0.27987	0.0416495	1.82156e-11	0.248362	0.197994	0.209699	0.422148	8	-0.139706	0.63643	1.28192	0.869614	1.88972	1.282(0.87,1.89)	0.910824
	cg26124115	14	PSEN1	73602899	rs61986932	14	73711953	A	C	0.0838446	-0.0826737	0.0648965	0.202687	0.402146	0.0561515	7.96229e-13	-0.205581	0.163909	0.209753	0.690896	20	-0.526843	0.115681	0.814174	0.590466	1.12264	0.814(0.59,1.123)	0.910824
	cg16946445	6	ELOVL5	53181687	rs209483	6	53173323	T	A	0.364008	-0.0450995	0.0355982	0.205189	0.300715	0.0340035	9.26388e-19	-0.149974	0.119587	0.209805	0.585608	20	-0.384365	0.0844165	0.86073	0.680883	1.08808	0.861(0.681,1.088)	0.910824
	cg00846647	17	MAPT	44060252	rs111751251	17	44042951	T	C	0.234151	0.0568161	0.0453992	0.21076	-1.18696	0.0317564	9.22815e-306	-0.0478669	0.0382698	0.211016	0.218482	20	-0.122876	0.0271419	0.953261	0.884374	1.02751	0.953(0.884,1.028)	0.910824
	cg20980271	1	CLCC1	109506696	rs12025134	1	109509043	T	C	0.424335	-0.0443289	0.0353824	0.21026	0.655398	0.0312391	9.9719e-98	-0.0676366	0.0540823	0.211072	0.335615	20	-0.173638	0.0383647	0.9346	0.840601	1.03911	0.935(0.841,1.039)	0.910824
	cg24118521	13	HTR2A	47472330	rs732821	13	47472879	C	T	0.49182	-0.0436274	0.0348801	0.211013	-0.993924	0.0269182	1.91374e-298	0.0438941	0.0351134	0.211275	0.146752	20	-0.0249282	0.112716	1.04487	0.97538	1.11931	1.045(0.975,1.119)	0.910824
	cg24320398	13	HTR2A	47472158	rs732821	13	47472879	C	T	0.49182	-0.0436274	0.0348801	0.211013	-0.954216	0.0277558	5.19898e-259	0.0457207	0.0365778	0.211315	0.157314	20	-0.0259718	0.117413	1.04678	0.974363	1.12458	1.047(0.974,1.125)	0.910824
	cg06020661	13	HTR2A	47472138	rs732821	13	47472879	C	T	0.49182	-0.0436274	0.0348801	0.211013	-0.891836	0.0290582	7.41975e-207	0.0489187	0.0391429	0.211392	0.154049	20	-0.0278014	0.125639	1.05013	0.972582	1.13387	1.05(0.973,1.134)	0.910824
	cg00352043	22	KDELR3	38863594	rs4821788	22	38848204	A	G	0.464213	0.0440665	0.0345438	0.202072	-0.212172	0.0340664	4.71881e-10	-0.207692	0.16619	0.2114	0.902172	11	-0.533424	0.11804	0.812457	0.586593	1.12529	0.812(0.587,1.125)	0.910824
	cg04658615	6	ELOVL5	53181709	rs209515	6	53205947	G	A	0.364008	-0.0445636	0.0355504	0.210012	0.521571	0.0331582	9.45761e-56	-0.0854411	0.0683763	0.211456	0.541713	20	-0.219459	0.0485764	0.918107	0.802953	1.04978	0.918(0.803,1.05)	0.910824
	cg07075299	13	HTR2A	47472360	rs732821	13	47472879	C	T	0.49182	-0.0436274	0.0348801	0.211013	-0.653381	0.0318188	1.06009e-93	0.0667718	0.0534829	0.211859	0.142368	20	-0.0380547	0.171598	1.06905	0.96266	1.1872	1.069(0.963,1.187)	0.910824
	cg12170654	6	MICB	31459698	rs2395040	6	31461711	G	A	0.461145	0.0435707	0.0349009	0.211881	0.845565	0.0285404	6.72098e-193	0.0515285	0.0413119	0.212286	0.293451	20	-0.0294428	0.1325	1.05288	0.970986	1.14168	1.053(0.971,1.142)	0.910824
	cg01192538	13	HTR2A	47472050	rs732821	13	47472879	C	T	0.49182	-0.0436274	0.0348801	0.211013	-0.492473	0.0324417	4.77911e-52	0.0885885	0.0710664	0.212559	0.16317	20	-0.0507016	0.227879	1.09263	0.950562	1.25593	1.093(0.951,1.256)	0.910824
	cg07471203	11	TM7SF2	64880911	rs112671673	11	64827523	G	T	0.0347648	0.0990501	0.0792278	0.211229	1.43515	0.0889997	1.69353e-58	0.0690172	0.0553709	0.212598	0.0778111	10	-0.0395098	0.177544	1.07145	0.961261	1.19428	1.071(0.961,1.194)	0.910824
	cg05340686	17	NFE2L1	46124771	rs11654342	17	46126689	T	G	0.110429	0.0682243	0.0544732	0.210411	0.610611	0.0503134	6.79519e-34	0.111731	0.0896848	0.21283	0.717743	20	-0.0640512	0.287513	1.11821	0.937957	1.33311	1.118(0.938,1.333)	0.910824
	cg20066792	20	PRNP	4664695	rs6076714	20	4661143	C	T	0.113497	0.0697769	0.0548412	0.203251	-0.307323	0.0516656	2.70924e-09	-0.227047	0.182485	0.213426	0.827699	7	-0.584718	0.130624	0.796883	0.557263	1.13954	0.797(0.557,1.14)	0.910824
	cg01640635	22	KDELR3	38864868	rs4821788	22	38848204	A	G	0.464213	0.0440665	0.0345438	0.202072	0.186185	0.033274	2.19976e-08	0.236681	0.190295	0.213589			-0.136297	0.609659	1.26704	0.872583	1.8398	1.267(0.873,1.84)	0.910824
	cg02625536	20	STAU1	47749901	rs6063351	20	47707944	T	C	0.440695	-0.0448927	0.0351691	0.201785	0.183076	0.0334297	4.33947e-08	-0.245214	0.19725	0.213809	0.593855	7	-0.631824	0.141396	0.782537	0.531621	1.15188	0.783(0.532,1.152)	0.910824
	cg21236500	9	TRAF2	139779897	rs7869864	9	139749067	C	T	0.241309	0.056559	0.0444222	0.202942	0.210855	0.0367176	9.32287e-09	0.268237	0.215792	0.213857	0.720454	8	-0.154715	0.691189	1.30766	0.856659	1.99609	1.308(0.857,1.996)	0.910824
	cg09394608	13	HTR2A	47472429	rs732821	13	47472879	C	T	0.49182	-0.0436274	0.0348801	0.211013	-0.353416	0.0333995	3.63224e-26	0.123445	0.0993812	0.214186	0.179038	20	-0.0713422	0.318232	1.13139	0.931143	1.3747	1.131(0.931,1.375)	0.910824
	cg10523019	2	RHBDD1	227700458	rs10192769	2	227699918	T	C	0.211656	-0.0518122	0.0412621	0.209231	-0.320594	0.0387431	1.2859e-16	0.161613	0.130179	0.214431	0.987444	14	-0.0935378	0.416764	1.17541	0.910704	1.51704	1.175(0.911,1.517)	0.910824
	cg15519474	17	PRKCA	64300902	rs12936396	17	64300114	T	C	0.246421	0.0497324	0.0396305	0.209515	0.295883	0.0367151	7.69913e-16	0.168081	0.135554	0.214991	0.678075	20	-0.0976048	0.433767	1.18303	0.907007	1.54306	1.183(0.907,1.543)	0.910824
	cg00613255	11	INS	2182376	rs3842727	11	2184848	G	T	0.294479	-0.0560566	0.0449589	0.212456	-0.38968	0.0343527	7.98707e-30	0.143853	0.116069	0.215207	0.915813	20	-0.0836422	0.371348	1.15471	0.91976	1.44969	1.155(0.92,1.45)	0.910824
	cg19451698	2	RHBDD1	227700467	rs10192769	2	227699918	T	C	0.211656	-0.0518122	0.0412621	0.209231	-0.284666	0.0386734	1.82856e-13	0.182011	0.147043	0.215789	0.946886	9	-0.106193	0.470215	1.19963	0.899251	1.60034	1.2(0.899,1.6)	0.910824
	cg21390682	13	F7	113743751	rs497724	13	113735733	G	A	0.398773	-0.0439437	0.0353414	0.213719	0.414903	0.0326475	5.29917e-37	-0.105913	0.0855867	0.215903	0.946853	20	-0.273663	0.0618369	0.899503	0.760588	1.06379	0.9(0.761,1.064)	0.910824
	cg12373184	4	QDPR	17438451	rs10035009	4	17440247	T	C	0.4591	0.0431319	0.0343666	0.209459	0.230452	0.031266	1.69755e-13	0.187162	0.151273	0.215996	0.519535	10	-0.109333	0.483657	1.20582	0.896432	1.622	1.206(0.896,1.622)	0.910824
	cg25010508	6	VEGFA	43726326	rs4711748	6	43694598	T	C	0.231084	0.0517318	0.0410355	0.207431	-0.24372	0.0393099	5.64737e-10	-0.212259	0.171817	0.216688	0.714426	5	-0.54902	0.124502	0.808755	0.577515	1.13258	0.809(0.578,1.133)	0.910824
	cg20754708	3	OPA1	193419842	rs11719309	3	193414780	C	T	0.44274	0.0427845	0.0344957	0.21487	0.442557	0.0319056	9.51467e-44	0.0966757	0.0782573	0.216698	0.0711044	20	-0.0567086	0.25006	1.1015	0.944869	1.2841	1.102(0.945,1.284)	0.910824
	cg13490352	7	EGFR	55072042	rs3757408	7	55071961	G	C	0.282209	-0.0490298	0.0394086	0.213448	0.353124	0.0350832	7.86249e-24	-0.138846	0.112449	0.216926	0.43385	20	-0.359246	0.081554	0.870362	0.698203	1.08497	0.87(0.698,1.085)	0.910824
	cg11084718	12	UBE2N	93834066	rs1021136	12	93813934	T	C	0.149284	0.0589358	0.0473831	0.213568	0.44161	0.0453091	1.90754e-22	0.133457	0.108167	0.217274	0.652717	20	-0.0785503	0.345464	1.14277	0.924456	1.41265	1.143(0.924,1.413)	0.910824
	cg17780731	5	PIK3R1	67483678	rs12652394	5	67461215	T	G	0.331288	0.0461688	0.0370737	0.213012	-0.281259	0.0333314	3.22115e-17	-0.16415	0.133241	0.217956	0.370359	20	-0.425302	0.0970024	0.848615	0.653572	1.10186	0.849(0.654,1.102)	0.910824
	cg08703151	4	WFS1	6299846	rs1079216	4	6282473	T	C	0.372188	-0.0449551	0.035731	0.208336	0.195596	0.0327721	2.39625e-09	-0.229837	0.186692	0.218287	0.411012	20	-0.595753	0.136079	0.794663	0.551147	1.14577	0.795(0.551,1.146)	0.910824
	cg09864961	11	INS	2183434	rs3842727	11	2184848	G	T	0.294479	-0.0560566	0.0449589	0.212456	-0.265732	0.0342311	8.30165e-15	0.210952	0.171357	0.2183	0.629187	13	-0.124908	0.546812	1.23485	0.882578	1.72774	1.235(0.883,1.728)	0.910824
	cg13380612	1	EDEM3	184633847	rs10797987	1	184651822	C	T	0.47546	0.04382	0.0349422	0.209816	0.207617	0.0321836	1.11107e-10	0.211062	0.171452	0.218313	0.251564	7	-0.124984	0.547108	1.23499	0.882511	1.72825	1.235(0.883,1.728)	0.910824
	cg19314866	1	CAPN2	223888956	rs61823965	1	223888955	A	C	0.139059	0.0620038	0.0503615	0.218258	0.81706	0.04474	1.64866e-74	0.0758864	0.0617774	0.219303	0.291244	20	-0.0451973	0.19697	1.07884	0.955809	1.21771	1.079(0.956,1.218)	0.910824
	cg04408448	6	MAN1A1	119674313	rs11153821	6	119736507	G	A	0.43047	0.0434006	0.0351537	0.216981	0.377206	0.0326342	6.67805e-31	0.115058	0.0937252	0.219592	0.0959791	20	-0.0686434	0.298759	1.12194	0.93366	1.34819	1.122(0.934,1.348)	0.910824
	cg00073380	16	ALG1	5122085	rs4786588	16	5124000	A	G	0.331288	-0.0628968	0.05043	0.21232	-0.227223	0.0331796	7.47503e-12	0.276807	0.225591	0.219812	0.930933	8	-0.165351	0.718965	1.31891	0.847596	2.05231	1.319(0.848,2.052)	0.910824
	cg04000281	11	STIP1	63949212	rs11601522	11	63958409	T	C	0.302658	-0.0463029	0.0376587	0.218869	-0.472405	0.0329834	1.583e-46	0.0980153	0.0800102	0.220562	0.797814	20	-0.0588047	0.254835	1.10298	0.942891	1.29025	1.103(0.943,1.29)	0.910824
	cg16591304	10	CASP7	115439377	rs7918733	10	115439394	T	C	0.396728	-0.0448962	0.0359798	0.212098	-0.210758	0.0337006	4.00511e-10	0.213023	0.174081	0.221067			-0.128176	0.554222	1.23741	0.879699	1.74059	1.237(0.88,1.741)	0.910824
	cg21919729	8	CTSB	11719367	rs1293303	8	11720227	C	G	0.431493	0.0441638	0.0360534	0.220591	0.743388	0.0288825	4.35534e-146	0.0594088	0.0485536	0.221114	0.867907	20	-0.0357563	0.154574	1.06121	0.964875	1.16716	1.061(0.965,1.167)	0.910824
	cg16624891	8	CTSB	11717853	rs1293303	8	11720227	C	G	0.431493	0.0441638	0.0360534	0.220591	0.606952	0.031107	8.72406e-85	0.0727633	0.0595176	0.2215	0.892592	20	-0.0438912	0.189418	1.07548	0.957058	1.20855	1.075(0.957,1.209)	0.910824
	cg22045253	1	ATP13A2	17337346	rs56047197	1	17338460	A	G	0.277096	0.0484037	0.0394644	0.220006	0.554431	0.0365248	4.82846e-52	0.0873033	0.0714121	0.221508	0.800011	20	-0.0526644	0.227271	1.09123	0.948698	1.25517	1.091(0.949,1.255)	0.910824
	cg03560973	2	POMC	25390400	rs111675422	2	25408582	T	C	0.197342	-0.0551869	0.0446383	0.216342	-0.348813	0.0425355	2.39352e-16	0.158214	0.129418	0.221519	0.446064	20	-0.0954453	0.411873	1.17142	0.908968	1.50964	1.171(0.909,1.51)	0.910824
	cg24063856	17	CRHR1	43863303	rs62057073	17	43861117	T	C	0.235174	0.0568165	0.0460256	0.217034	-0.315348	0.0387757	4.20106e-16	-0.180171	0.147624	0.222286	0.210301	15	-0.469514	0.109172	0.835127	0.625306	1.11535	0.835(0.625,1.115)	0.910824
	cg03870138	16	CYBA	88717850	rs3794624	16	88717074	A	G	0.315951	0.0464927	0.0377117	0.217634	0.28261	0.032955	9.85484e-18	0.164512	0.134813	0.222351	0.970251	13	-0.0997215	0.428745	1.17882	0.905089	1.53533	1.179(0.905,1.535)	0.910824
	cg16419418	12	MGST1	16539032	rs3759207	12	16516710	C	T	0.312883	-0.0464047	0.0379466	0.221369	-0.624822	0.0339811	1.65894e-75	0.0742687	0.060866	0.222389	0.0731494	20	-0.0450287	0.193566	1.0771	0.95597	1.21357	1.077(0.956,1.214)	0.910824
	cg05913451	5	VTRNA1-1	140090684	rs2531359	5	140117068	A	C	0.192229	-0.0540932	0.0440026	0.218953	0.378284	0.0383765	6.38162e-23	-0.142996	0.117223	0.222515	0.69918	20	-0.372753	0.0867611	0.866758	0.688835	1.09064	0.867(0.689,1.091)	0.910824
	cg07884764	11	CCDC88B	64107517	rs604203	11	64016935	C	A	0.460123	0.0424388	0.0346749	0.220988	-0.482493	0.0328221	6.42313e-49	-0.0879574	0.0721147	0.222584	0.263404	20	-0.229302	0.0533874	0.9158	0.795088	1.05484	0.916(0.795,1.055)	0.910824
	cg22654980	8	CTSB	11721826	rs1293303	8	11720227	C	G	0.431493	0.0441638	0.0360534	0.220591	0.404283	0.0318891	7.8529e-37	0.10924	0.0895938	0.222738	0.711668	20	-0.0663638	0.284844	1.11543	0.93579	1.32955	1.115(0.936,1.33)	0.910824
	cg14059288	13	HTR2A	47468240	rs9590997	13	47476046	A	G	0.0531697	-0.105904	0.0865401	0.221045	-0.745192	0.0724508	8.19289e-25	0.142116	0.11695	0.224296	0.266458	7	-0.087106	0.371338	1.15271	0.91658	1.44967	1.153(0.917,1.45)	0.910824
	cg03661164	7	EZH2	148560646	rs6963089	7	148499227	A	G	0.0674847	-0.0880961	0.0711148	0.215425	0.365034	0.0605793	1.68357e-09	-0.241337	0.198891	0.224973	0.0517469	3	-0.631163	0.148489	0.785577	0.531973	1.16008	0.786(0.532,1.16)	0.910824
	cg12860391	15	RYR3	33602821	rs8024512	15	33520413	T	G	0.498978	0.043211	0.0348845	0.215461	-0.196018	0.0325749	1.77171e-09	-0.220444	0.181697	0.225034	0.372764	4	-0.57657	0.135682	0.802163	0.561822	1.14532	0.802(0.562,1.145)	0.910824
	cg27554954	15	ANXA2	60691595	rs8033800	15	60689179	T	A	0.419223	0.0455951	0.0375644	0.22483	-0.934225	0.0276842	1.23273e-249	-0.0488052	0.0402351	0.22513	0.750584	20	-0.127666	0.0300556	0.952367	0.880147	1.03051	0.952(0.88,1.031)	0.910824
	cg06886789	4	WFS1	6299403	rs11725494	4	6293855	C	T	0.382413	-0.0424827	0.0348988	0.223486	-0.45931	0.0326257	5.17454e-45	0.0924923	0.0762645	0.225212	0.788547	20	-0.0569861	0.241971	1.0969	0.944607	1.27376	1.097(0.945,1.274)	0.910824
	cg19344881	6	CNR1	89241236	rs4707462	6	89095222	T	A	0.515337	0.0428741	0.0345685	0.214878	-0.177329	0.0318173	2.49882e-08	-0.241777	0.199709	0.22603			-0.633207	0.149653	0.785231	0.530887	1.16143	0.785(0.531,1.161)	0.910824
	cg13507964	21	MX1	42792703	rs459498	21	42795027	A	G	0.390593	0.0424272	0.0349563	0.224854	0.488568	0.0328396	4.62e-50	0.0868399	0.0717862	0.226393	0.0263988	20	-0.0538611	0.227541	1.09072	0.947564	1.25551	1.091(0.948,1.256)	0.910824
	cg00632466	8	MTDH	98610888	rs1904271	8	98610808	G	T	0.334356	-0.0500103	0.0406367	0.218447	-0.232657	0.0354982	5.59974e-11	0.214953	0.177716	0.22646	0.386138	4	-0.13337	0.563276	1.2398	0.875141	1.75642	1.24(0.875,1.756)	0.910824
	cg21549285	21	MX1	42799141	rs459498	21	42795027	A	G	0.390593	0.0424272	0.0349563	0.224854	0.467023	0.0328089	5.58395e-46	0.090846	0.0751208	0.226535	0.0273309	20	-0.0563908	0.238083	1.0951	0.94517	1.26881	1.095(0.945,1.269)	0.910824
	cg16228356	17	CRHR1	43848958	rs17689882	17	43906828	A	G	0.234151	0.0536897	0.0443588	0.226144	-0.917366	0.0361815	8.0025e-142	-0.058526	0.0484096	0.226672	0.279998	20	-0.153409	0.0363568	0.943154	0.857779	1.03703	0.943(0.858,1.037)	0.910824
	cg21705961	17	MAPT	44060775	rs17689882	17	43906828	A	G	0.234151	0.0536897	0.0443588	0.226144	-0.736163	0.0364129	6.92222e-91	-0.0729318	0.0603646	0.226975	0.175353	20	-0.191246	0.0453828	0.929664	0.825929	1.04643	0.93(0.826,1.046)	0.910824
	cg17132535	2	MCFD2	47133191	rs11890177	2	47133055	C	T	0.194274	0.0580964	0.0473192	0.219539	0.276692	0.0410029	1.49792e-11	0.209968	0.173825	0.227076	0.92737	15	-0.130729	0.550665	1.23364	0.877456	1.73441	1.234(0.877,1.734)	0.910824
	cg25725418	10	CAMK2G	75639879	rs2461867	10	75624645	G	T	0.232106	-0.0504881	0.0413969	0.222612	-0.319168	0.036882	4.9834e-18	0.158186	0.130984	0.227172	0.305963	18	-0.0985426	0.414915	1.17138	0.906157	1.51424	1.171(0.906,1.514)	0.910824
	cg26898376	11	CCDC88B	64110657	rs76247963	11	64217467	G	C	0.0419223	-0.112712	0.0920196	0.220623	0.536951	0.0745095	5.7418e-13	-0.209912	0.173832	0.227219	0.603329	3	-0.550623	0.130799	0.810656	0.576591	1.13974	0.811(0.577,1.14)	0.910824
	cg07713192	7	SERPINE1	100757628	rs73168398	7	100695138	A	G	0.113497	0.0659364	0.0539802	0.2219	0.44812	0.0560731	1.33085e-15	0.14714	0.121858	0.227251	0.872618	20	-0.0917017	0.385982	1.15852	0.912377	1.47106	1.159(0.912,1.471)	0.910824
	cg27226214	3	VHL	10190289	rs2272125	3	10138069	G	T	0.141104	0.0591367	0.0483389	0.221187	0.312571	0.0417845	7.40109e-14	0.189195	0.156704	0.227302	0.635243	17	-0.117945	0.496335	1.20828	0.888745	1.64269	1.208(0.889,1.643)	0.910824
	cg05301556	17	MAPT	43971177	rs10445363	17	43914558	A	G	0.235174	0.0533744	0.0440499	0.225634	-0.558812	0.0393179	7.64548e-46	-0.0955141	0.0791136	0.227316	0.200463	20	-0.250577	0.0595486	0.908906	0.778352	1.06136	0.909(0.778,1.061)	0.910824
	cg00020340	7	GET4	910388	rs6961643	7	884279	A	G	0.149284	-0.0659379	0.054301	0.224632	0.511691	0.0462103	1.69443e-28	-0.128863	0.106757	0.227406	0.939204	20	-0.338107	0.0803807	0.879094	0.713119	1.0837	0.879(0.713,1.084)	0.910824
	cg08455676	17	SREBF1	17743186	rs11652144	17	17733934	C	T	0.421268	0.0426181	0.0350493	0.224005	0.324738	0.0331505	1.17296e-22	0.131238	0.108759	0.227553	0.772165	20	-0.0819296	0.344406	1.14024	0.921337	1.41115	1.14(0.921,1.411)	0.910824
	cg16733866	21	MX1	42792609	rs459498	21	42795027	A	G	0.390593	0.0424272	0.0349563	0.224854	0.365777	0.0329938	1.46315e-28	0.115992	0.0961383	0.22762	0.0458891	16	-0.0724391	0.304423	1.12299	0.930122	1.35584	1.123(0.93,1.356)	0.910824
	cg05703996	16	PDIA2	335830	rs1150189	16	355583	G	A	0.375256	-0.0441885	0.0361445	0.221499	0.24582	0.0331292	1.17078e-13	-0.17976	0.149019	0.227706	0.0793196	20	-0.471837	0.112317	0.835471	0.623855	1.11887	0.835(0.624,1.119)	0.910824
	cg03871267	5	PIK3R1	67483475	rs12188596	5	67492833	G	A	0.095092	-0.0759774	0.0629144	0.227189	-0.805816	0.0538179	1.10205e-50	0.0942863	0.0783289	0.228697	0.0171716	20	-0.0592383	0.247811	1.09887	0.942482	1.28122	1.099(0.942,1.281)	0.910824
	cg05532980	16	ERN2	23721859	rs189875	16	23966492	A	G	0.0531697	0.10385	0.0850718	0.222186	-0.501829	0.0694588	5.0168e-13	-0.206943	0.171926	0.228715	0.554265	9	-0.543918	0.130032	0.813066	0.58047	1.13886	0.813(0.58,1.139)	0.910824
	cg11211624	8	TUSC3	15542010	rs2736016	8	15697730	T	C	0.0429448	-0.117338	0.0974059	0.228347	-2.31807	0.0789024	1.02012e-189	0.0506188	0.0420556	0.228738	0.870364	20	-0.0318102	0.133048	1.05192	0.96869	1.1423	1.052(0.969,1.142)	0.910824
	cg16614020	5	SLC6A3	1414806	rs1973489	5	1381260	A	G	0.238241	0.0487811	0.0400945	0.223736	0.299466	0.0363757	1.83211e-16	0.162894	0.135341	0.228752	0.91958	7	-0.102374	0.428162	1.17691	0.902692	1.53444	1.177(0.903,1.534)	0.910824
	cg08900409	19	GDF15	18475669	rs4072287	19	18475675	C	A	0.320041	0.0498139	0.0413117	0.227892	-0.634304	0.0341233	3.97702e-77	-0.0785332	0.0652661	0.228869	0.676153	20	-0.206455	0.0493884	0.924471	0.813463	1.05063	0.924(0.813,1.051)	0.910824
	cg17052885	17	RPTOR	78896012	rs2271608	17	78899458	A	G	0.230061	0.0531294	0.0437578	0.224683	0.335441	0.039958	4.66566e-17	0.158387	0.131806	0.229492	0.960666	15	-0.0999528	0.416727	1.17162	0.90488	1.51699	1.172(0.905,1.517)	0.910824
	cg00564723	10	CAMK2G	75632066	rs2688626	10	75611090	G	A	0.221881	-0.0500429	0.0415029	0.227907	0.505332	0.0371438	3.75225e-42	-0.0990297	0.0824519	0.229728	0.0705529	20	-0.260635	0.062576	0.905716	0.770562	1.06458	0.906(0.771,1.065)	0.910824
	cg11924019	15	CYP1A1	75019283	rs12903896	15	75052495	C	T	0.407975	-0.0444921	0.0365201	0.223114	0.240357	0.0340525	1.68409e-12	-0.185108	0.154188	0.22993	0.98374	16	-0.487316	0.1171	0.831015	0.614273	1.12423	0.831(0.614,1.124)	0.910824
	cg18413339	17	RPTOR	78519192	rs12937147	17	78526565	C	T	0.213701	-0.0518423	0.0424437	0.221921	-0.256696	0.0396835	9.89241e-11	0.20196	0.168268	0.230051	0.214308	8	-0.127845	0.531765	1.2238	0.87999	1.70193	1.224(0.88,1.702)	0.910824
	cg09038676	11	GSTP1	67351608	rs4930444	11	67342580	A	G	0.412065	-0.0423656	0.0352169	0.228981	0.537415	0.0309709	1.89642e-67	-0.0788321	0.0656875	0.230098	0.229956	20	-0.20758	0.0499154	0.924195	0.812549	1.05118	0.924(0.813,1.051)	0.910824
	cg24937675	6	SGK1	134639482	rs395172	6	134645054	T	A	0.392638	-0.0424411	0.0347591	0.222084	-0.206291	0.0319442	1.06192e-10	0.205734	0.171481	0.230237	0.116048	12	-0.130369	0.541837	1.22843	0.877772	1.71916	1.228(0.878,1.719)	0.910824
	cg13696706	9	DAB2IP	124396830	rs10120537	9	124224316	T	G	0.393661	0.0445434	0.0368016	0.226138	0.284135	0.032632	3.11364e-18	0.156768	0.130767	0.23059	0.0179066	20	-0.0995353	0.413071	1.16972	0.905258	1.51145	1.17(0.905,1.511)	0.910824
	cg21416237	17	FKBP10	39970091	rs77597339	17	39963639	T	C	0.0920245	-0.0752339	0.062208	0.226512	0.480203	0.0529965	1.29215e-19	-0.156671	0.130694	0.23062	0.976093	11	-0.412831	0.0994892	0.854985	0.661774	1.10461	0.855(0.662,1.105)	0.910824
	cg13432087	8	ANK1	41523480	rs13275940	8	41460789	C	T	0.44274	0.0425972	0.0350508	0.224251	0.234367	0.0322606	3.73598e-13	0.181754	0.151633	0.230666	0.712677	16	-0.115447	0.478955	1.19932	0.890968	1.61439	1.199(0.891,1.614)	0.910824
	cg02722434	15	FURIN	91362469	rs439188	15	91365342	T	C	0.327198	-0.0444203	0.037017	0.23014	-0.774987	0.0322261	8.6722e-128	0.0573175	0.0478241	0.23072	0.607985	20	-0.0364177	0.151053	1.05899	0.964237	1.16306	1.059(0.964,1.163)	0.910824
	cg11503396	2	POMC	25419761	rs2384092	2	25402891	C	T	0.201431	-0.0534509	0.0444404	0.229071	0.578034	0.0411351	7.47795e-45	-0.0924702	0.0771631	0.230772	0.440018	20	-0.24371	0.0587695	0.911676	0.783715	1.06053	0.912(0.784,1.061)	0.910824
	cg22467052	7	CFTR	117307076	rs17547853	7	117226904	A	G	0.183027	0.0561381	0.0460828	0.223148	0.317242	0.0478047	3.21866e-11	0.176957	0.147688	0.230847	0.101097	20	-0.112511	0.466425	1.19358	0.893587	1.59429	1.194(0.894,1.594)	0.910824
	cg08923054	8	ANK1	41654455	rs10099197	8	41654458	C	T	0.230061	-0.0490738	0.0408591	0.229732	-0.662161	0.0399703	1.22024e-61	0.0741116	0.0618677	0.230954	0.796271	20	-0.0471491	0.195372	1.07693	0.953945	1.21576	1.077(0.954,1.216)	0.910824
	cg03687700	2	FKBP1B	24271844	rs112055711	2	24282759	T	C	0.107362	0.0642406	0.0530081	0.22555	0.393054	0.0501287	4.47315e-15	0.16344	0.136463	0.231042	0.429198	7	-0.104027	0.430907	1.17755	0.901201	1.53865	1.178(0.901,1.539)	0.910824
	cg23991055	11	TM7SF2	64880626	rs111903700	11	64922708	T	C	0.0357873	0.0963913	0.0793454	0.22443	0.626516	0.0894219	2.44718e-12	0.153853	0.128535	0.231318	0.0989698	4	-0.0980756	0.405782	1.16632	0.90658	1.50047	1.166(0.907,1.5)	0.910824
	cg25344376	1	CAPN2	223906133	rs6674492	1	223906113	G	A	0.236196	0.052044	0.0432148	0.22847	0.367754	0.0375881	1.3217e-22	0.141518	0.118397	0.231974	0.511206	20	-0.0905401	0.373576	1.15202	0.913438	1.45292	1.152(0.913,1.453)	0.910824
	cg02717061	13	COL4A1	110959356	rs4773140	13	110954237	A	G	0.258691	0.0532165	0.0441136	0.227682	0.325121	0.037282	2.76775e-18	0.163682	0.136976	0.232098			-0.104791	0.432155	1.17784	0.900513	1.54057	1.178(0.901,1.541)	0.910824
	cg20937981	17	RPTOR	78679630	rs60469059	17	78668313	T	C	0.179959	-0.0529039	0.0438692	0.227838	0.361604	0.0417439	4.61791e-18	-0.146303	0.122488	0.232311	0.98756	20	-0.386379	0.0937735	0.863896	0.679513	1.09831	0.864(0.68,1.098)	0.910824
	cg23202277	17	MAPT	43971911	rs112995313	17	43795768	C	T	0.235174	0.0537335	0.0447369	0.229712	0.405064	0.0375729	4.24474e-27	0.132654	0.111127	0.23259	0.212275	20	-0.0851549	0.350463	1.14185	0.91837	1.41972	1.142(0.918,1.42)	0.910824
	cg19894980	7	FAM20C	175967	rs7798239	7	175401	C	T	0.0674847	-0.0873427	0.0725779	0.228808	0.647426	0.0688861	5.53471e-21	-0.134908	0.113017	0.2326	0.845014	3	-0.356421	0.0866053	0.873796	0.700178	1.09047	0.874(0.7,1.09)	0.910824
	cg05549655	15	CYP1A1	75019143	rs12903896	15	75052495	C	T	0.407975	-0.0444921	0.0365201	0.223114	0.205655	0.0345026	2.51356e-09	-0.216344	0.181251	0.232629	0.915791	10	-0.571596	0.138908	0.805458	0.564624	1.14902	0.805(0.565,1.149)	0.910824
	cg18092474	15	CYP1A1	75019302	rs12903896	15	75052495	C	T	0.407975	-0.0444921	0.0365201	0.223114	0.202297	0.0344322	4.22258e-09	-0.219935	0.184368	0.232903	0.723047	4	-0.581296	0.141426	0.802571	0.559173	1.15192	0.803(0.559,1.152)	0.910824
	cg16785077	21	MX1	42791867	rs459498	21	42795027	A	G	0.390593	0.0424272	0.0349563	0.224854	0.21658	0.0336132	1.16905e-10	0.195896	0.16424	0.232969	0.887481	5	-0.126014	0.517806	1.2164	0.881602	1.67834	1.216(0.882,1.678)	0.910824
	cg23668222	8	ANK1	41542092	rs7823698	8	41577121	G	C	0.0817996	-0.0822573	0.0688719	0.23234	-1.20691	0.0545495	1.81406e-108	0.0681553	0.0571477	0.23302	0.374401	10	-0.0438542	0.180165	1.07053	0.957093	1.19741	1.071(0.957,1.197)	0.910824
	cg14316565	11	CAT	34460789	rs35960263	11	34510012	A	G	0.400818	0.0424003	0.0348649	0.223935	-0.195667	0.0321992	1.22633e-09	-0.216696	0.181718	0.233071	0.956206	12	-0.572863	0.139471	0.805175	0.563908	1.14967	0.805(0.564,1.15)	0.910824
	cg14599956	5	LMAN2	176779173	rs4131290	5	176780682	C	A	0.311861	0.0468979	0.0387432	0.226095	0.246881	0.0362829	1.01516e-11	0.189961	0.159395	0.233352	0.905605	20	-0.122453	0.502375	1.2092	0.884747	1.65264	1.209(0.885,1.653)	0.910824
	cg05433222	7	PON1	94948020	rs3917558	7	94932904	C	T	0.0633947	0.0914928	0.0751951	0.223703	-0.371553	0.0630129	3.71388e-09	-0.246244	0.206644	0.233405	0.193881	4	-0.651266	0.158778	0.781731	0.521385	1.17208	0.782(0.521,1.172)	0.910824
	cg00192773	16	MAPK3	30131641	rs116922328	16	29965785	A	G	0.0848671	-0.0826704	0.0680613	0.224501	-0.392381	0.0641216	9.39706e-10	0.210689	0.176841	0.233495	0.0728228	6	-0.135919	0.557297	1.23453	0.872913	1.74595	1.235(0.873,1.746)	0.910824
	cg10772086	3	TF	133464651	rs9847885	3	133438344	T	C	0.0654397	0.0991172	0.0828855	0.231762	-1.08261	0.078963	8.80306e-43	-0.0915539	0.0768515	0.233532	0.712857	9	-0.242183	0.059075	0.912512	0.784913	1.06085	0.913(0.785,1.061)	0.910824
	cg13570656	15	CYP1A1	75019196	rs12903896	15	75052495	C	T	0.407975	-0.0444921	0.0365201	0.223114	0.196615	0.0345631	1.28105e-08	-0.226291	0.189956	0.233545	0.804671	12	-0.598605	0.146023	0.797486	0.549578	1.15722	0.797(0.55,1.157)	0.910824
	cg20131968	17	CCDC47	61850012	rs3826341	17	61819222	C	A	0.40184	0.0440856	0.0367276	0.230008	0.316135	0.0326244	3.3204e-22	0.139452	0.117065	0.233562	0.0873704	20	-0.0899954	0.368899	1.14964	0.913935	1.44614	1.15(0.914,1.446)	0.910824
	cg26172342	8	ANK1	41654331	rs10099197	8	41654458	C	T	0.230061	-0.0490738	0.0408591	0.229732	0.375048	0.0410495	6.45159e-20	-0.130847	0.109881	0.233731	0.854761	20	-0.346214	0.0845198	0.877352	0.707361	1.08819	0.877(0.707,1.088)	0.910824
	cg09577511	12	AQP2	50349173	rs3759126	12	50343862	G	A	0.194274	-0.0518722	0.0433147	0.231086	-0.424474	0.0393455	3.90605e-27	0.122204	0.10267	0.233946	0.959005	10	-0.0790292	0.323437	1.12998	0.924013	1.38187	1.13(0.924,1.382)	0.910824
	cg25308976	11	KCNJ11	17434268	rs7932122	11	17431361	A	G	0.095092	-0.0703404	0.0589516	0.232795	0.774362	0.0498225	1.7909e-54	-0.0908366	0.0763533	0.234169	0.505717	20	-0.240489	0.0588159	0.913167	0.786243	1.06058	0.913(0.786,1.061)	0.910824
	cg23598419	2	POMC	25391042	rs2384092	2	25402891	C	T	0.201431	-0.0534509	0.0444404	0.229071	-0.322043	0.0415998	9.8278e-15	0.165975	0.139651	0.234638	0.500045	17	-0.107741	0.439691	1.18054	0.89786	1.55223	1.181(0.898,1.552)	0.910824
	cg22902089	11	CREB3L1	46318223	rs72910027	11	46276544	C	T	0.207566	-0.0563867	0.0465886	0.226159	0.274501	0.0437576	3.53651e-10	-0.205415	0.172851	0.234678	0.948136	11	-0.544203	0.133373	0.814309	0.580304	1.14268	0.814(0.58,1.143)	0.910824
	cg18070470	3	ATP2C1	130614013	rs852211	3	130573787	T	C	0.383436	0.0428114	0.035402	0.226551	0.214808	0.0334675	1.37716e-10	0.199301	0.167708	0.234683	0.970714	15	-0.129407	0.528009	1.22055	0.878617	1.69555	1.221(0.879,1.696)	0.910824
	cg09149648	20	MMP9	44642370	rs6094239	20	44653549	G	A	0.0460123	0.0938315	0.0772419	0.224452	0.472021	0.0824201	1.02213e-08	0.198787	0.167282	0.234701	0.95891	6	-0.129086	0.52666	1.21992	0.878899	1.69327	1.22(0.879,1.693)	0.910824
	cg04523291	3	OXTR	8809501	rs4686302	3	8809222	T	C	0.117587	-0.0635352	0.0524099	0.225408	0.299854	0.0502589	2.4286e-09	-0.211887	0.178356	0.234834	0.784169	6	-0.561465	0.137691	0.809056	0.570373	1.14762	0.809(0.57,1.148)	0.910824
	cg15706250	8	ANK1	41583321	rs7823698	8	41577121	G	C	0.0817996	-0.0822573	0.0688719	0.23234	0.671108	0.0583257	1.22748e-30	-0.122569	0.103176	0.234845	0.47164	9	-0.324794	0.079656	0.884645	0.722676	1.08291	0.885(0.723,1.083)	0.910824
	cg14030674	8	ANK1	41654557	rs10099197	8	41654458	C	T	0.230061	-0.0490738	0.0408591	0.229732	0.319193	0.0410794	7.8391e-15	-0.153743	0.129528	0.235246	0.835767	20	-0.407618	0.100132	0.857492	0.665233	1.10532	0.857(0.665,1.105)	0.910824
	cg19537719	8	ANK1	41583498	rs7823698	8	41577121	G	C	0.0817996	-0.0822573	0.0688719	0.23234	0.619302	0.0582394	2.07661e-26	-0.132823	0.111908	0.235271	0.665956	6	-0.352163	0.0865167	0.87562	0.703166	1.09037	0.876(0.703,1.09)	0.910824
	cg02192228	3	OXTR	8809536	rs4686302	3	8809222	T	C	0.117587	-0.0635352	0.0524099	0.225408	0.28879	0.0504739	1.05545e-08	-0.220005	0.18551	0.235644	0.97027	3	-0.583605	0.143595	0.802515	0.557884	1.15442	0.803(0.558,1.154)	0.910824
	cg01163369	3	RPN1	128370232	rs9848287	3	128347642	C	T	0.210634	-0.0495759	0.0417406	0.234946	-0.664541	0.0363708	1.40075e-74	0.0746018	0.0629437	0.235933	0.430278	20	-0.0487679	0.197971	1.07746	0.952402	1.21893	1.077(0.952,1.219)	0.910824
	cg18614735	8	ANK1	41583523	rs7823698	8	41577121	G	C	0.0817996	-0.0822573	0.0688719	0.23234	0.54695	0.0582072	5.63495e-21	-0.150393	0.126933	0.236089			-0.399182	0.0983957	0.86037	0.670869	1.1034	0.86(0.671,1.103)	0.910824
	cg20683151	2	TM4SF20	228243972	rs79763692	2	228268484	T	C	0.175869	0.053455	0.0445783	0.230479	-0.325532	0.0425715	2.06194e-14	-0.164208	0.138613	0.236156	0.571019	19	-0.435889	0.107473	0.848566	0.646689	1.11346	0.849(0.647,1.113)	0.910824
	cg05064567	17	RPTOR	78870138	rs8064817	17	78865950	T	C	0.155419	-0.0584252	0.0492781	0.235772	-1.00663	0.0401271	7.06416e-139	0.0580404	0.0490082	0.236294	0.910675	20	-0.0380157	0.154096	1.05976	0.962698	1.1666	1.06(0.963,1.167)	0.910824
	cg15192041	11	CCND1	69414923	rs1872568	11	69418138	G	A	0.279141	0.0447705	0.0376362	0.234219	-0.444479	0.0355553	7.36755e-36	-0.100726	0.0850574	0.236329	0.143549	20	-0.267439	0.0659865	0.904181	0.765337	1.06821	0.904(0.765,1.068)	0.910824
	cg16960046	7	EGFR	55053391	rs11238340	7	55020736	C	T	0.284254	-0.0487759	0.0403923	0.227218	0.211904	0.0355492	2.50899e-09	-0.230179	0.194488	0.236605	0.466573	12	-0.611375	0.151017	0.794391	0.542604	1.16302	0.794(0.543,1.163)	0.910824
	cg12636421	7	CD36	79998795	rs1878214	7	79998913	C	G	0.128834	0.0630638	0.0527357	0.231756	-0.396703	0.0484353	2.60413e-16	-0.15897	0.134344	0.23669	0.630847	5	-0.422284	0.104344	0.853022	0.655548	1.10998	0.853(0.656,1.11)	0.910824
	cg21249771	2	BOK	242484705	rs76527535	2	242484701	T	C	0.268916	0.0515427	0.0434846	0.235895	0.746514	0.037456	2.21674e-88	0.0690445	0.0583531	0.236722	0.0372436	20	-0.0453276	0.183417	1.07148	0.955684	1.20131	1.071(0.956,1.201)	0.910824
	cg26544377	7	SEC61G	54955929	rs6964716	7	54957745	G	A	0.497955	0.0415173	0.0346632	0.23102	-0.23965	0.0320241	7.24119e-14	-0.173241	0.146482	0.236935	0.225812	5	-0.460346	0.113864	0.840935	0.631065	1.1206	0.841(0.631,1.121)	0.910824
	cg06824812	8	CLN8	1731480	rs55991725	8	1722495	C	T	0.110429	0.0677851	0.0572142	0.236112	0.859106	0.0521504	5.67808e-61	0.0789019	0.0667694	0.237321	0.24362	20	-0.0519661	0.20977	1.0821	0.949361	1.23339	1.082(0.949,1.233)	0.910824
	cg21605333	4	SEC24D	119757512	rs17515340	4	118939270	G	C	0.0541922	-0.0890682	0.0739457	0.228393	0.401976	0.0666063	1.58858e-09	-0.221576	0.187584	0.237519	0.957874	20	-0.589241	0.146089	0.801255	0.554748	1.1573	0.801(0.555,1.157)	0.910824
	cg16556677	11	KCNQ1OT1	2722401	rs463924	11	2717680	T	C	0.294479	-0.0443841	0.0373526	0.234736	-0.336033	0.033854	3.21033e-23	0.132083	0.111951	0.238071	0.959461	20	-0.087341	0.351507	1.1412	0.916365	1.42121	1.141(0.916,1.421)	0.910824
	cg10017888	19	CALM3	47105860	rs4803982	19	47067476	T	C	0.180982	-0.0542316	0.0454867	0.233163	0.339666	0.0419954	6.05693e-16	-0.159661	0.135363	0.238197	0.568624	12	-0.424972	0.10565	0.852433	0.653788	1.11143	0.852(0.654,1.111)	0.910824
	cg09760422	2	PROC	128146352	rs4536600	2	128002572	G	A	0.333333	0.042933	0.0363773	0.237915	0.913513	0.0295234	3.25535e-210	0.0469977	0.0398503	0.238256	0.173334	20	-0.0311089	0.125104	1.04812	0.96937	1.13327	1.048(0.969,1.133)	0.910824
	cg10462778	5	ERGIC1	172314133	rs693557	5	172314091	G	A	0.305726	0.0449445	0.0379928	0.236819	-0.502867	0.0338265	5.47407e-50	-0.0893766	0.0757912	0.238299	0.568863	20	-0.237927	0.0591742	0.914501	0.78826	1.06096	0.915(0.788,1.061)	0.910824
	cg15337538	11	SMPD1	6408135	rs73398846	11	6404889	C	T	0.0633947	-0.0809571	0.0677119	0.231848	0.469322	0.0656778	8.94602e-13	-0.172498	0.146282	0.238311	0.83214	9	-0.459211	0.114215	0.84156	0.631782	1.12099	0.842(0.632,1.121)	0.910824
	cg15926420	1	CASQ1	160159672	rs1408664	1	160147148	G	A	0.315951	0.0456701	0.038094	0.230575	-0.228345	0.0357876	1.76437e-10	-0.200005	0.169746	0.238693	0.8681	3	-0.532707	0.132697	0.818727	0.587014	1.1419	0.819(0.587,1.142)	0.910824
	cg03474731	11	CHEK1	125495234	rs3740901	11	125476543	C	A	0.287321	0.0470422	0.0395522	0.234294	0.293022	0.0343162	1.35517e-17	0.160542	0.136283	0.238798	0.548457	20	-0.106573	0.427657	1.17415	0.89891	1.53366	1.174(0.899,1.534)	0.910824
	cg04777474	2	SPAST	32288478	rs13034714	2	32204162	A	G	0.111452	0.0671009	0.0568497	0.237873	0.922729	0.0496627	4.6707e-77	0.07272	0.0617346	0.238818	0.745466	20	-0.0482798	0.19372	1.07543	0.952867	1.21376	1.075(0.953,1.214)	0.910824
	cg22902288	7	GET4	925032	rs7785205	7	925032	T	C	0.149284	-0.0662242	0.0562325	0.238922	-1.51923	0.0365105	0	0.0435907	0.0370286	0.23911	0.932508	20	-0.0289854	0.116167	1.04455	0.971431	1.12318	1.045(0.971,1.123)	0.910824
	cg11059357	8	ANK1	41649676	rs2111804	8	41644266	A	T	0.238241	-0.0489079	0.0412163	0.235379	0.348442	0.0389022	3.3401e-19	-0.140362	0.119321	0.23946	0.66947	20	-0.374231	0.0935072	0.869044	0.687818	1.09802	0.869(0.688,1.098)	0.910824
	cg10174333	1	CASQ2	116336029	rs12039739	1	116333111	T	C	0.281186	-0.045835	0.0385382	0.234306	-0.279732	0.0356303	4.12869e-15	0.163853	0.13934	0.239626	0.263921	3	-0.109253	0.436959	1.17804	0.896503	1.54799	1.178(0.897,1.548)	0.910824
	cg23200218	19	RYR1	39050485	rs12327672	19	39050479	C	G	0.0756646	0.0856855	0.0713451	0.229751	-0.453268	0.0786176	8.14282e-09	-0.189039	0.16078	0.23969	0.781057	7	-0.504168	0.12609	0.827754	0.604008	1.13438	0.828(0.604,1.134)	0.910824
	cg02240665	17	RPTOR	78683272	rs9674559	17	78715608	G	A	0.223926	0.0498974	0.0419335	0.234079	-0.286477	0.0385687	1.10502e-13	-0.174176	0.148243	0.24002	0.99928	20	-0.464732	0.11638	0.840149	0.628303	1.12342	0.84(0.628,1.123)	0.910824
	cg00176210	8	ANK1	41654967	rs10099197	8	41654458	C	T	0.230061	-0.0490738	0.0408591	0.229732	0.232895	0.0411482	1.5145e-08	-0.210712	0.179347	0.24004	0.685375	6	-0.562232	0.140808	0.810007	0.569935	1.1512	0.81(0.57,1.151)	0.910824
	cg20438286	11	CSNK2A1	11371451	rs2071461	11	11373960	C	T	0.273006	-0.0458679	0.0388055	0.237208	0.340942	0.0361564	4.11452e-21	-0.134533	0.114709	0.24087	0.207252	19	-0.359363	0.0902966	0.874124	0.698121	1.0945	0.874(0.698,1.094)	0.910824
	cg14659346	2	ALPP	233246431	rs1048995	2	233274509	G	C	0.0879346	0.0790595	0.06732	0.240242	1.30151	0.0582195	1.07449e-110	0.0607445	0.0517959	0.24089	0.278214	20	-0.0407755	0.162264	1.06263	0.960045	1.17617	1.063(0.96,1.176)	0.910824
	cg12728665	13	F7	113744906	rs503176	13	113744874	A	G	0.124744	-0.0689782	0.0579558	0.233973	0.358748	0.0522334	6.50273e-12	-0.192275	0.163958	0.240913	0.235968	7	-0.513633	0.129083	0.82508	0.598318	1.13778	0.825(0.598,1.138)	0.910824
	cg21887591	3	EDEM1	5259831	rs74677825	3	5197305	C	A	0.0562372	0.0996541	0.0832479	0.231276	-0.448562	0.0769749	5.63031e-09	-0.222164	0.189464	0.240959	0.534134	7	-0.593513	0.149185	0.800784	0.552383	1.16089	0.801(0.552,1.161)	0.910824
	cg23176538	14	AKT1	105238924	rs3803304	14	105239146	G	C	0.264826	-0.050023	0.0425202	0.239414	0.51694	0.0358238	3.34799e-47	-0.0967675	0.0825265	0.240971	0.997147	20	-0.258519	0.0649844	0.907767	0.772194	1.06714	0.908(0.772,1.067)	0.910824
	cg21191514	11	TH	2187921	rs12419447	11	2187855	C	G	0.360941	-0.0487534	0.0415074	0.240166	0.628998	0.0320129	5.98232e-86	-0.0775097	0.0661076	0.241005	0.670111	20	-0.207081	0.0520612	0.925418	0.812954	1.05344	0.925(0.813,1.053)	0.910824
	cg23080546	6	MICA	31382831	rs79556279	6	31329846	T	G	0.0777096	0.087938	0.0740018	0.234706	-0.611215	0.0855305	8.92374e-13	-0.143874	0.122736	0.241106	0.901355	4	-0.384437	0.0966886	0.865997	0.680834	1.10152	0.866(0.681,1.102)	0.910824
	cg04118462	3	RNF13	149530148	rs1552596	3	149519843	G	A	0.0736196	-0.0839105	0.0702022	0.231982	-0.410149	0.0694552	3.52158e-09	0.204585	0.174634	0.241393	0.476407	4	-0.137698	0.546868	1.22702	0.871362	1.72783	1.227(0.871,1.728)	0.910824
	cg20412244	6	HLA-C	31276664	rs2442721	6	31320242	C	T	0.350716	-0.0507055	0.0430448	0.238808	-0.367947	0.0338156	1.42027e-27	0.137806	0.11767	0.241547	0.691437	20	-0.0928272	0.368439	1.14775	0.911351	1.44548	1.148(0.911,1.445)	0.910824
	cg00377727	14	SEC23A	39573919	rs72673317	14	39579193	A	T	0.0695297	0.081025	0.0692857	0.242229	-2.60176	0.0373659	0	-0.0311424	0.0266341	0.242296	0.435746	20	-0.0833452	0.0210604	0.969338	0.920033	1.02128	0.969(0.92,1.021)	0.910824
	cg09135529	11	UBXN1	62448703	rs7937698	11	62240811	G	A	0.0572597	0.14188	0.119359	0.234562	-0.552139	0.0856393	1.13891e-10	-0.256965	0.219819	0.242409			-0.68781	0.17388	0.773395	0.502676	1.18991	0.773(0.503,1.19)	0.910824
	cg14210321	2	NCK2	106509881	rs35677272	2	106509202	T	C	0.350716	-0.0438905	0.0374985	0.241816	-0.526002	0.0331035	7.47596e-57	0.0834417	0.0714828	0.24309	0.395058	20	-0.0566646	0.223548	1.08702	0.944911	1.25051	1.087(0.945,1.251)	0.910824
	cg04731988	20	OXT	3051954	rs877172	20	3049890	G	T	0.352761	-0.0549975	0.0465556	0.237472	0.263107	0.0350862	6.43725e-14	-0.209031	0.179128	0.243235	0.21048	8	-0.560122	0.14206	0.81137	0.571139	1.15265	0.811(0.571,1.153)	0.910824
	cg16623098	16	AMFR	56374383	rs9930839	16	56374384	A	G	0.0664622	-0.0846853	0.0726084	0.243481	-2.53045	0.0514486	0	0.0334665	0.0287019	0.243614	0.270324	20	-0.0227892	0.0897222	1.03403	0.977468	1.09387	1.034(0.977,1.094)	0.910824
	cg06069861	17	NFE2L1	46124725	rs8067470	17	46128122	G	A	0.110429	0.063479	0.0543693	0.242987	1.04729	0.0483273	3.87271e-104	0.0606127	0.0519896	0.243671	0.871873	20	-0.0412869	0.162512	1.06249	0.959554	1.17646	1.062(0.96,1.176)	0.910824
	cg10533397	6	HLA-A	29924310	rs115313680	6	29952107	G	C	0.0460123	-0.0873649	0.0738079	0.23654	-0.5182	0.0792798	6.30395e-11	0.168593	0.144748	0.244126			-0.115113	0.452299	1.18364	0.891265	1.57192	1.184(0.891,1.572)	0.910824
	cg16924061	18	CYB5A	71955528	rs6566789	18	71933499	A	G	0.254601	0.0452985	0.0385332	0.239766	-0.292616	0.0353149	1.17203e-16	-0.154805	0.133004	0.244458	0.584329	20	-0.415493	0.105883	0.856582	0.660015	1.11169	0.857(0.66,1.112)	0.910824
	cg16843718	22	CRELD2	50322571	rs62232059	22	50257459	G	A	0.0879346	-0.0752984	0.0641923	0.24079	0.507247	0.0545316	1.37961e-20	-0.148445	0.127553	0.244506	0.28454	20	-0.398449	0.101559	0.862047	0.671361	1.1069	0.862(0.671,1.107)	0.910824
	cg21520111	19	TRPM4	49713645	rs11882563	19	49661547	G	A	0.134969	-0.0736214	0.0628471	0.241424	0.460853	0.0482915	1.38549e-21	-0.15975	0.137395	0.244948	0.6415	6	-0.429044	0.109544	0.852357	0.651131	1.11577	0.852(0.651,1.116)	0.910824
	cg16615348	5	VTRNA1-1	140090765	rs2563337	5	140107452	G	A	0.185072	-0.0522115	0.0442315	0.237835	0.26528	0.0394963	1.86037e-11	-0.196816	0.16929	0.244993	0.438854	18	-0.528624	0.134992	0.821342	0.589415	1.14453	0.821(0.589,1.145)	0.910824
	cg26955850	20	OXT	3052345	rs877172	20	3049890	G	T	0.352761	-0.0549975	0.0465556	0.237472	0.222065	0.035215	2.86392e-10	-0.247664	0.213295	0.245589	0.198656	7	-0.665722	0.170394	0.780622	0.513902	1.18577	0.781(0.514,1.186)	0.910824
	cg03744383	16	CES1	55867072	rs35914948	16	55788829	C	T	0.213701	-0.0692799	0.0595023	0.244294	-0.631315	0.0407427	3.73978e-54	0.109739	0.0945171	0.245622	0.660231	18	-0.0755145	0.294993	1.11599	0.927266	1.34312	1.116(0.927,1.343)	0.910824
	cg01255465	6	BAG6	31619581	rs433061	6	32014828	A	G	0.0715746	-0.0715298	0.0602586	0.235209	-0.260452	0.0471403	3.29416e-08	0.274637	0.236641	0.245819	0.167858	19	-0.189179	0.738453	1.31605	0.827638	2.0927	1.316(0.828,2.093)	0.910824
	cg23144852	3	OPA1	193405999	rs13067959	3	193407703	A	C	0.437628	0.0403904	0.0345533	0.242433	0.315588	0.0328787	8.10683e-22	0.127984	0.110298	0.245904	0.129022	20	-0.0882001	0.344168	1.13653	0.915578	1.41082	1.137(0.916,1.411)	0.910824
	cg09554406	19	TRPM4	49714044	rs11882563	19	49661547	G	A	0.134969	-0.0736214	0.0628471	0.241424	0.404026	0.0481702	4.96762e-17	-0.182219	0.157062	0.245978	0.397116	6	-0.490061	0.125623	0.833419	0.612589	1.13385	0.833(0.613,1.134)	0.910824
	cg18225577	19	TRPM4	49713901	rs11882563	19	49661547	G	A	0.134969	-0.0736214	0.0628471	0.241424	0.403578	0.0483658	7.16506e-17	-0.182422	0.157252	0.246025	0.410605	6	-0.490636	0.125792	0.83325	0.612237	1.13405	0.833(0.612,1.134)	0.910824
	cg13765939	22	MIAT	27053250	rs5752374	22	27050962	C	T	0.462168	-0.0405966	0.0346832	0.241801	-0.276652	0.0326103	2.18367e-17	0.146743	0.126555	0.246248	0.625928	20	-0.101305	0.394791	1.15806	0.903658	1.48407	1.158(0.904,1.484)	0.910824
	cg10951975	19	TRPM4	49713828	rs11882563	19	49661547	G	A	0.134969	-0.0736214	0.0628471	0.241424	0.392939	0.0484329	4.936e-16	-0.187361	0.1616	0.246288	0.657295	6	-0.504097	0.129375	0.829144	0.604051	1.13812	0.829(0.604,1.138)	0.910824
	cg09109383	16	ABCC1	16083164	rs215065	16	16078641	G	A	0.244376	0.0466502	0.0401519	0.2453	0.64282	0.0365879	4.23969e-69	0.0725711	0.0625986	0.24633	0.384204	20	-0.0501222	0.195264	1.07527	0.951113	1.21563	1.075(0.951,1.216)	0.910824
	cg18790057	7	FAM20C	204337	rs4075862	7	198401	T	C	0.424335	0.0444758	0.0382237	0.2446	0.439529	0.0327086	3.63555e-41	0.10119	0.0872906	0.246363	0.650971	17	-0.0698996	0.27228	1.10649	0.932487	1.31295	1.106(0.932,1.313)	0.910824
	cg13512830	3	RNF13	149530294	rs76414616	3	149528859	G	A	0.0725971	-0.0820153	0.0704667	0.24447	-0.829893	0.0694248	6.1987e-33	0.0988264	0.0853121	0.246697	0.304802	18	-0.0683853	0.266038	1.10387	0.933901	1.30478	1.104(0.934,1.305)	0.910824
	cg21464289	4	UCHL1	41256169	rs13115546	4	41280472	T	G	0.447853	-0.0412344	0.0348971	0.237365	-0.18538	0.0316274	4.59065e-09	0.222432	0.192033	0.246743	0.690192	14	-0.153953	0.598817	1.24911	0.857313	1.81996	1.249(0.857,1.82)	0.910824
	cg22144450	17	ORMDL3	38080378	rs2290400	17	38066240	T	C	0.48773	-0.0403483	0.0347002	0.244924	-0.407799	0.032235	1.10729e-36	0.0989416	0.0854501	0.24691	0.276987	20	-0.0685406	0.266424	1.104	0.933756	1.30529	1.104(0.934,1.305)	0.910824
	cg09357140	16	PDIA2	332745	rs2685120	16	342080	G	C	0.349693	-0.0427503	0.0361317	0.236738	-0.182473	0.0328066	2.66583e-08	0.234283	0.202442	0.247156	0.157607	12	-0.162503	0.631069	1.264	0.850013	1.87962	1.264(0.85,1.88)	0.910824
	cg10802371	3	RNF13	149530305	rs76414616	3	149528859	G	A	0.0725971	-0.0820153	0.0704667	0.24447	-0.7163	0.0699663	1.34279e-24	0.114499	0.0990097	0.247502	0.314648	17	-0.07956	0.308558	1.12131	0.923523	1.36146	1.121(0.924,1.361)	0.910824
	cg09175289	11	TM7SF2	64879080	rs72932837	11	64876740	T	C	0.224949	-0.0483126	0.041371	0.242892	0.318106	0.0385126	1.4593e-16	-0.151876	0.131347	0.247563	0.761625	20	-0.409316	0.105564	0.859095	0.664104	1.11134	0.859(0.664,1.111)	0.910824
	cg06872548	17	RPTOR	78716983	rs35434628	17	78714760	T	C	0.108384	-0.0618177	0.0533975	0.246991	1.11581	0.0480707	3.45762e-119	-0.0554017	0.0479148	0.247578	0.964244	20	-0.149315	0.0385113	0.946105	0.861298	1.03926	0.946(0.861,1.039)	0.910824
	cg00717279	7	FAM20C	208985	rs4075862	7	198401	T	C	0.424335	0.0444758	0.0382237	0.2446	0.333558	0.032748	2.29955e-24	0.133338	0.115339	0.247662	0.745191	16	-0.0927264	0.359402	1.14264	0.911443	1.43247	1.143(0.911,1.432)	0.910824
	cg25044876	22	CYB5R3	43041146	rs130333	22	43066379	C	T	0.488753	0.0404719	0.03463	0.242527	-0.242799	0.0321437	4.23586e-14	-0.166689	0.144325	0.24811	0.389094	19	-0.449566	0.116188	0.846463	0.637905	1.12321	0.846(0.638,1.123)	0.910824
	cg27280266	8	UBXN2B	59259265	rs10101033	8	59290963	A	G	0.330266	0.0414148	0.0355097	0.243495	0.273114	0.0334965	3.53515e-16	0.151639	0.131341	0.248277	0.113972	20	-0.105789	0.409067	1.16374	0.899614	1.50541	1.164(0.9,1.505)	0.910824
	cg06418238	17	RPTOR	78755442	rs4969246	17	78740579	G	A	0.109407	-0.0611052	0.0529362	0.248369	1.25704	0.0445524	3.84265e-175	-0.0486104	0.042147	0.248765	0.709357	20	-0.131219	0.0339977	0.952552	0.877026	1.03458	0.953(0.877,1.035)	0.910824
	cg17838626	11	ACER3	76571610	rs10899326	11	76649172	T	C	0.123722	-0.0702757	0.0598529	0.240339	0.317879	0.0517595	8.17625e-10	-0.221077	0.191698	0.248806	0.190889	5	-0.596805	0.154651	0.801655	0.550568	1.16725	0.802(0.551,1.167)	0.910824
	cg06153925	17	RPTOR	78755379	rs4969246	17	78740579	G	A	0.109407	-0.0611052	0.0529362	0.248369	1.20369	0.0456451	2.97714e-153	-0.0507649	0.0440203	0.248822	0.82627	20	-0.137045	0.0355149	0.950502	0.871931	1.03615	0.951(0.872,1.036)	0.910824
	cg22878693	17	RPTOR	78755604	rs4969246	17	78740579	G	A	0.109407	-0.0611052	0.0529362	0.248369	0.982514	0.0481217	1.17457e-92	-0.0621928	0.0539643	0.249124	0.942105	20	-0.167963	0.0435772	0.939702	0.845385	1.04454	0.94(0.845,1.045)	0.910824
	cg02017208	14	HSP90AA1	102547744	rs4947	14	102550803	G	A	0.160532	-0.0531386	0.0459272	0.247264	-0.562495	0.0442414	4.92913e-37	0.0944695	0.0819864	0.249215	0.961534	20	-0.0662238	0.255163	1.09908	0.935921	1.29067	1.099(0.936,1.291)	0.910824
	cg14343513	17	RPTOR	78753273	rs4969246	17	78740579	G	A	0.109407	-0.0611052	0.0529362	0.248369	0.822691	0.0486608	4.02008e-64	-0.0742748	0.0644949	0.24947	0.837528	20	-0.200685	0.0521352	0.928417	0.81817	1.05352	0.928(0.818,1.054)	0.910824
	cg05098037	17	RPTOR	78753327	rs4969246	17	78740579	G	A	0.109407	-0.0611052	0.0529362	0.248369	0.804106	0.0491771	4.26227e-60	-0.0759915	0.0659961	0.249546	0.805157	20	-0.205344	0.0533609	0.926824	0.814367	1.05481	0.927(0.814,1.055)	0.910824
	cg15541987	11	H19	2077307	rs80293987	11	2078745	T	A	0.0777096	-0.077747	0.0674517	0.249061	-1.24145	0.0597965	9.70285e-96	0.062626	0.0544167	0.24979	0.291139	20	-0.0440307	0.169283	1.06463	0.956925	1.18445	1.065(0.957,1.184)	0.910824
	cg06244754	7	FAM20C	204966	rs4075862	7	198401	T	C	0.424335	0.0444758	0.0382237	0.2446	0.252422	0.0333264	3.61254e-14	0.176196	0.153204	0.250113	0.708276	9	-0.124084	0.476476	1.19267	0.883306	1.61039	1.193(0.883,1.61)	0.910824
	cg26474666	13	F7	113739251	rs41286606	13	113739357	C	A	0.0654397	-0.0781355	0.0672345	0.245181	0.451539	0.0607432	1.05705e-13	-0.173043	0.150709	0.250891	0.504126	12	-0.468433	0.122347	0.841101	0.625983	1.13015	0.841(0.626,1.13)	0.910824
	cg17059388	4	SPCS3	177262070	rs13103064	4	177280028	C	G	0.297546	-0.0474567	0.041224	0.249654	0.553124	0.0359273	1.75035e-53	-0.0857976	0.0747375	0.250974	0.909579	20	-0.232283	0.0606879	0.91778	0.792722	1.06257	0.918(0.793,1.063)	0.910824
	cg00747849	22	SLC25A1	19165386	rs112198122	22	19165997	A	G	0.0848671	0.0806512	0.0697769	0.247745	-0.591024	0.0620339	1.61207e-21	-0.13646	0.118927	0.251204	0.991008	13	-0.369557	0.0966369	0.872441	0.69104	1.10146	0.872(0.691,1.101)	0.910824
	cg04394641	1	ATP13A2	17350304	rs2746474	1	17348544	G	T	0.197342	-0.0526011	0.0452649	0.245207	-0.293788	0.0418033	2.09706e-12	0.179044	0.156166	0.251587	0.100482	16	-0.127041	0.485129	1.19607	0.880697	1.62439	1.196(0.881,1.624)	0.910824
	cg14163049	7	EPO	100324222	rs56261104	7	100324836	G	C	0.344581	-0.0558224	0.0485136	0.249875	-0.445505	0.0347121	1.0537e-37	0.125301	0.109333	0.251771	0.168993	20	-0.0889917	0.339594	1.13349	0.914853	1.40438	1.133(0.915,1.404)	0.910824
	cg22900229	2	POMC	25391773	rs4665775	2	25407121	G	A	0.201431	-0.05153	0.0444381	0.246215	0.319433	0.0426837	7.22494e-14	-0.161317	0.140776	0.251829	0.363283	17	-0.437238	0.114604	0.851022	0.645818	1.12143	0.851(0.646,1.121)	0.910824
	cg23518678	18	GRP	56889748	rs72952220	18	56870956	C	G	0.196319	-0.0582661	0.050259	0.246327	-0.312853	0.0415191	4.87773e-14	0.186241	0.162538	0.251864	0.0674312	9	-0.132333	0.504815	1.20471	0.876049	1.65668	1.205(0.876,1.657)	0.910824
	cg03652561	7	FAM20C	205900	rs4075862	7	198401	T	C	0.424335	0.0444758	0.0382237	0.2446	0.214713	0.0327809	5.75588e-11	0.207141	0.18081	0.251948	0.448049	6	-0.147247	0.561529	1.23016	0.863081	1.75335	1.23(0.863,1.753)	0.910824
	cg04064452	2	BOK	242486462	rs79355916	2	242486020	A	G	0.215746	0.0508365	0.0436425	0.244084	0.237337	0.0381479	4.92444e-10	0.214195	0.187079	0.252232	0.292542	17	-0.15248	0.58087	1.23886	0.858576	1.78759	1.239(0.859,1.788)	0.910824
	cg20893956	6	ESR1	152126736	rs862346	6	152016369	T	A	0.44683	0.0410658	0.0356321	0.249119	-0.324786	0.0327134	3.13792e-23	-0.126439	0.110446	0.25229	0.039071	20	-0.342913	0.0900352	0.881228	0.7097	1.09421	0.881(0.71,1.094)	0.910824
	cg02043342	7	FAM20C	204593	rs4075862	7	198401	T	C	0.424335	0.0444758	0.0382237	0.2446	0.213262	0.0334072	1.72837e-10	0.20855	0.182187	0.252331	0.290642	4	-0.148537	0.565637	1.23189	0.861969	1.76057	1.232(0.862,1.761)	0.910824
	cg27619457	5	TERT	1298761	rs27068	5	1347239	T	C	0.255624	0.0486684	0.0422569	0.249434	0.367104	0.0361471	3.12155e-24	0.132574	0.115847	0.252462	0.967115	19	-0.0944861	0.359634	1.14176	0.90984	1.43281	1.142(0.91,1.433)	0.910824
	cg15524516	14	RTN1	60336659	rs968124	14	60325695	C	A	0.244376	-0.0473547	0.0410631	0.248822	0.360846	0.0390604	2.50784e-20	-0.131232	0.11468	0.252485	0.611413	10	-0.356005	0.0935408	0.877014	0.700469	1.09806	0.877(0.7,1.098)	0.910824
	cg16302441	2	POMC	25391830	rs4665769	2	25403310	T	C	0.201431	-0.0524589	0.0455307	0.249253	0.374063	0.0424622	1.25922e-18	-0.140241	0.122756	0.253273	0.416715	20	-0.380843	0.100361	0.869149	0.683285	1.10557	0.869(0.683,1.106)	0.910824
	cg08639283	12	HSPB8	119589848	rs73213438	12	119599129	A	G	0.160532	0.0562971	0.0490291	0.25087	0.475901	0.0419585	8.10869e-30	0.118296	0.10355	0.253288	0.595088	11	-0.084662	0.321254	1.12558	0.918823	1.37886	1.126(0.919,1.379)	0.910824
	cg09592546	17	RPTOR	78652902	rs35542453	17	78687242	G	T	0.099182	-0.0614829	0.0538191	0.253289	-1.97443	0.0316508	0	0.0311396	0.0272626	0.253368	0.849675	20	-0.0222951	0.0845743	1.03163	0.977952	1.08825	1.032(0.978,1.088)	0.910824
	cg02272150	14	CALM3	90864424	rs9806062	14	90849408	G	T	0.119632	-0.0608872	0.0531182	0.251688	0.657711	0.0516643	4.0042e-37	-0.0925744	0.081089	0.253603	0.130854	20	-0.251509	0.06636	0.911581	0.777627	1.06861	0.912(0.778,1.069)	0.910824
	cg10909506	17	ORMDL3	38081995	rs56380902	17	38066372	T	C	0.488753	-0.0396802	0.0347069	0.252917	-0.638548	0.0306627	2.57525e-96	0.0621412	0.0544347	0.253631	0.240294	20	-0.0445508	0.168833	1.06411	0.956427	1.18392	1.064(0.956,1.184)	0.910824
	cg15409939	20	CEBPB	48789081	rs6122884	20	48789388	G	A	0.347648	0.0425824	0.0365855	0.244459	-0.198989	0.0346105	8.95741e-09	-0.213994	0.187587	0.253965	0.463307	4	-0.581665	0.153677	0.807353	0.558967	1.16611	0.807(0.559,1.166)	0.910824
	cg14131038	2	NCK2	106360709	rs997136	2	106366022	T	C	0.391616	-0.0406212	0.0354018	0.251203	-0.29474	0.0333448	9.64429e-19	0.13782	0.12112	0.255168	0.0535069	20	-0.0995752	0.375215	1.14777	0.905222	1.4553	1.148(0.905,1.455)	0.910824
	cg24384816	20	SRC	35972312	rs6017916	20	35971278	C	A	0.246421	0.0447611	0.0393118	0.254862	-0.799459	0.0316787	1.59393e-140	-0.0559893	0.049223	0.255345	0.317317	20	-0.152466	0.0404878	0.945549	0.858588	1.04132	0.946(0.859,1.041)	0.910824
	cg11210813	20	SRC	35972385	rs6017916	20	35971278	C	A	0.246421	0.0447611	0.0393118	0.254862	-0.78176	0.0317342	5.37602e-134	-0.0572569	0.0503399	0.255369	0.277782	20	-0.155923	0.0414093	0.944351	0.855625	1.04228	0.944(0.856,1.042)	0.910824
	cg04037970	7	SEC61G	54955965	rs12538812	7	54970059	A	C	0.497955	0.0391528	0.0342855	0.253468	-0.39976	0.0314786	5.95692e-37	-0.0979408	0.0861112	0.255381	0.528421	20	-0.266719	0.0708372	0.906703	0.765888	1.07341	0.907(0.766,1.073)	0.910824
	cg24764793	6	ESR1	152126745	rs862346	6	152016369	T	A	0.44683	0.0410658	0.0356321	0.249119	-0.228045	0.0329622	4.56839e-12	-0.180077	0.158404	0.255611	0.0469469	12	-0.490549	0.130395	0.835206	0.61229	1.13928	0.835(0.612,1.139)	0.910824
	cg25902229	17	RPTOR	78864088	rs7223646	17	78874242	A	G	0.205521	-0.0507799	0.0446975	0.255923	0.889053	0.0357155	8.93698e-137	-0.0571169	0.0503277	0.256418	0.944908	20	-0.155759	0.0415254	0.944484	0.855765	1.0424	0.944(0.856,1.042)	0.910824
	cg13775306	6	ITPR3	33577711	rs11757612	6	33574488	G	T	0.183027	0.0488964	0.0430024	0.255513	0.527377	0.039892	6.71591e-40	0.0927161	0.0818412	0.257265	0.996423	20	-0.0676927	0.253125	1.09715	0.934548	1.28804	1.097(0.935,1.288)	0.910824
	cg01803928	13	DLEU2	50701619	rs1523178	13	50652456	C	A	0.222904	-0.0494945	0.0427942	0.247448	0.218724	0.0389779	2.00588e-08	-0.226288	0.199767	0.257315	0.492191	8	-0.617831	0.165255	0.797488	0.539112	1.17969	0.797(0.539,1.18)	0.910824
	cg19071367	11	RAB1B	66036015	rs484261	11	66061233	C	A	0.276074	0.0451366	0.0390941	0.248269	0.199781	0.0342456	5.41856e-09	0.225931	0.19948	0.257384	0.425729	4	-0.16505	0.616912	1.25349	0.847851	1.8532	1.253(0.848,1.853)	0.910824
	cg23903787	4	LRPAP1	3527371	rs2252054	4	3496058	T	C	0.095092	-0.0681295	0.0599846	0.256047	-0.691334	0.0510224	7.96427e-42	0.0985479	0.0870707	0.257712	0.712494	11	-0.0721107	0.269206	1.10357	0.930428	1.30893	1.104(0.93,1.309)	0.910824
	cg01018437	12	AQP2	50345765	rs402813	12	50348674	C	T	0.196319	-0.0501059	0.0436769	0.2513	-0.268844	0.0388153	4.3219e-12	0.186376	0.164675	0.257728	0.923881	10	-0.136387	0.509139	1.20488	0.872505	1.66386	1.205(0.873,1.664)	0.910824
	cg24046689	7	GET4	922235	rs4076072	7	892902	T	C	0.184049	-0.0527971	0.0459857	0.250919	0.271801	0.0421731	1.15684e-10	-0.194249	0.171852	0.258339	0.552222	5	-0.531079	0.142581	0.823453	0.58797	1.15325	0.823(0.588,1.153)	0.910824
	cg24425171	2	POMC	25391711	rs874401	2	25402280	A	G	0.201431	-0.0508463	0.044625	0.254531	0.360574	0.0416468	4.80524e-18	-0.141015	0.124828	0.258615	0.404192	20	-0.385678	0.103648	0.868476	0.67999	1.10921	0.868(0.68,1.109)	0.910824
	cg17737471	19	CHERP	16633898	rs10413178	19	16676327	T	C	0.120654	0.0682132	0.0597431	0.253547	0.412216	0.0530908	8.20552e-15	0.165479	0.14649	0.258633	0.840149	11	-0.121641	0.452599	1.17996	0.885466	1.57239	1.18(0.885,1.572)	0.910824
	cg25167838	7	SHH	155605092	rs9333596	7	155603978	G	A	0.195297	-0.0604098	0.0528453	0.252979	-0.28858	0.0417071	4.54167e-12	0.209335	0.185604	0.259381	0.760914	3	-0.154449	0.573119	1.23286	0.856887	1.77379	1.233(0.857,1.774)	0.910824
	cg05045817	1	EDEM3	184633523	rs4498770	1	184638266	C	T	0.477505	0.0392814	0.0347772	0.258681	0.63521	0.0311201	1.32025e-92	0.0618399	0.0548329	0.259409	0.778884	20	-0.0456326	0.169312	1.06379	0.955393	1.18449	1.064(0.955,1.184)	0.910824
	cg08194989	8	ANK1	41655154	rs11774972	8	41624105	T	C	0.412065	0.0432951	0.0375803	0.249293	0.183081	0.0335165	4.69717e-08	0.23648	0.209782	0.259629	0.29237	7	-0.174693	0.647653	1.26678	0.839715	1.91105	1.267(0.84,1.911)	0.910824
	cg02079741	2	POMC	25390424	rs7590512	2	25406403	T	C	0.202454	-0.0519777	0.045789	0.25631	-0.404177	0.0424119	1.5757e-21	0.128601	0.11409	0.259663	0.333791	20	-0.0950154	0.352217	1.13724	0.909359	1.42222	1.137(0.909,1.422)	0.910824
	cg16077055	2	NCK2	106428750	rs34530540	2	106434395	T	C	0.359918	-0.0417799	0.0370284	0.259185	0.62034	0.0322974	3.22807e-82	-0.06735	0.0597934	0.260005	0.471014	20	-0.184545	0.0498451	0.934868	0.831482	1.05111	0.935(0.831,1.051)	0.910824
	cg15093383	17	RPA1	1820445	rs66506713	17	1819511	T	C	0.373211	-0.0442807	0.0390254	0.256517	0.316957	0.0341694	1.7587e-20	-0.139706	0.124043	0.260052	0.339533	20	-0.38283	0.103418	0.869614	0.681929	1.10896	0.87(0.682,1.109)	0.910824
	cg00306721	11	BSCL2	62477480	rs7112576	11	62511420	A	G	0.187117	0.0505067	0.0441674	0.25282	-0.246631	0.038189	1.05981e-10	-0.204786	0.181869	0.26016	0.801934	8	-0.561249	0.151677	0.814822	0.570496	1.16378	0.815(0.57,1.164)	0.910824
	cg11010744	7	FAM20C	171613	rs73671758	7	190734	T	G	0.522495	0.0411942	0.0365532	0.259757	-0.71005	0.0293747	4.36981e-129	-0.0580159	0.0515356	0.260274	0.890085	20	-0.159026	0.0429939	0.943635	0.852974	1.04393	0.944(0.853,1.044)	0.910824
	cg24642169	1	ATF3	212731669	rs1331060	1	212702656	G	A	0.126789	0.0566304	0.050215	0.259421	-0.832869	0.0476236	1.75076e-68	-0.0679944	0.0604168	0.26041	0.229585	20	-0.186411	0.0504225	0.934266	0.829932	1.05172	0.934(0.83,1.052)	0.910824
	cg18702104	4	QDPR	17488243	rs2597771	4	17491370	A	G	0.287321	-0.0423491	0.0376131	0.260202	1.00904	0.0295234	5.19768e-256	-0.0419697	0.0372963	0.260461	0.638496	20	-0.11507	0.031131	0.958899	0.891303	1.03162	0.959(0.891,1.032)	0.910824
	cg01307671	17	NFE2L1	46126298	rs7222646	17	46185421	T	C	0.110429	0.0616917	0.0546306	0.258792	0.625851	0.0477418	2.92141e-39	0.0985726	0.0876135	0.260553	0.629269	14	-0.0731499	0.270295	1.10359	0.929462	1.31035	1.104(0.929,1.31)	0.910824
	cg18745416	6	ESR1	152011399	rs851996	6	152016803	T	C	0.445808	0.0401119	0.0354391	0.257696	0.334279	0.0327807	2.03579e-24	0.119995	0.106668	0.260612	0.0369217	20	-0.0890743	0.329064	1.12749	0.914778	1.38967	1.127(0.915,1.39)	0.910824
	cg15739309	8	CLN8	1711235	rs56394020	8	1756462	C	G	0.102249	0.0726283	0.0632729	0.251027	0.313175	0.0554239	1.5994e-08	0.23191	0.206163	0.260639	0.0776215	10	-0.172169	0.635989	1.26101	0.841836	1.88889	1.261(0.842,1.889)	0.910824
	cg15736220	7	FAM20C	183875	rs73671758	7	190734	T	G	0.522495	0.0411942	0.0365532	0.259757	0.546438	0.0308741	4.27695e-70	0.0753867	0.067029	0.260721	0.680173	20	-0.0559901	0.206764	1.0783	0.945548	1.22969	1.078(0.946,1.23)	0.910824
	cg06908052	17	RPTOR	78880396	rs12951596	17	78880383	T	C	0.127812	-0.0563837	0.0497306	0.256886	-0.404922	0.0461264	1.65638e-18	0.139246	0.123835	0.260825	0.112238	20	-0.103471	0.381963	1.14941	0.901703	1.46516	1.149(0.902,1.465)	0.910824
	cg14190534	14	CALM3	90848416	rs3814847	14	90862036	G	C	0.326176	-0.0407078	0.0359505	0.257497	-0.315783	0.0335633	5.02921e-21	0.128911	0.114667	0.260922	0.161903	20	-0.0958363	0.353658	1.13759	0.908613	1.42427	1.138(0.909,1.424)	0.910824
	cg19708576	6	HSP90AB1	44214097	rs3757283	6	44214417	C	A	0.193252	0.0509468	0.0446914	0.254299	-0.266297	0.0401671	3.36315e-11	-0.191316	0.170288	0.261233	0.0734401	4	-0.52508	0.142448	0.825872	0.591508	1.15309	0.826(0.592,1.153)	0.910824
	cg01035869	6	HLA-C	31242584	rs28380932	6	31319977	G	A	0.187117	-0.0574753	0.051149	0.261147	-0.939745	0.0365566	9.87287e-146	0.0611606	0.0544806	0.261602	0.102528	20	-0.0456214	0.167943	1.06307	0.955404	1.18287	1.063(0.955,1.183)	0.910824
	cg13622265	9	DAB2IP	124584474	rs7862029	9	124600375	G	T	0.403885	0.0404566	0.0358045	0.258506	0.303817	0.032332	5.62462e-21	0.133161	0.118698	0.261927	0.960627	20	-0.0994871	0.365809	1.14243	0.905302	1.44168	1.142(0.905,1.442)	0.910824
	cg21714557	13	F10	113776873	rs522487	13	113737099	C	T	0.392638	-0.0396752	0.0352324	0.260123	-0.393437	0.0327128	2.56238e-33	0.100843	0.089942	0.262205	0.429085	20	-0.0754433	0.277129	1.1061	0.927332	1.31934	1.106(0.927,1.319)	0.910824
	cg17211562	2	LPIN1	11886253	rs62113309	2	11896225	T	C	0.137014	0.0552783	0.0488809	0.258107	-0.380021	0.0458038	1.07029e-16	-0.145461	0.129816	0.262494	0.171991	19	-0.3999	0.108978	0.864624	0.670387	1.11514	0.865(0.67,1.115)	0.910824
	cg05488279	17	RPA1	1819770	rs66506713	17	1819511	T	C	0.373211	-0.0442807	0.0390254	0.256517	0.236068	0.0341331	4.64265e-12	-0.187576	0.167524	0.262844	0.118937	4	-0.515923	0.140771	0.828966	0.596949	1.15116	0.829(0.597,1.151)	0.910824
	cg03904897	3	ATP2C1	130612806	rs62282193	3	130650432	T	C	0.120654	0.0534234	0.0474984	0.260699	-0.536268	0.0476614	2.27383e-29	-0.0996207	0.0890136	0.263071	0.894672	20	-0.274087	0.074846	0.905181	0.760266	1.07772	0.905(0.76,1.078)	0.910824
	cg27621484	13	F7	113739510	rs522487	13	113737099	C	T	0.392638	-0.0396752	0.0352324	0.260123	0.301381	0.0312764	5.6316e-22	-0.131645	0.117699	0.263359	0.719978	10	-0.362335	0.099045	0.876652	0.696049	1.10412	0.877(0.696,1.104)	0.910824
	cg17519955	1	EDEM3	184634036	rs4498770	1	184638266	C	T	0.477505	0.0392814	0.0347772	0.258681	0.263882	0.0329041	1.05972e-15	0.14886	0.133092	0.263364	0.440994	9	-0.112	0.40972	1.16051	0.894044	1.5064	1.161(0.894,1.506)	0.910824
	cg05927268	14	ABCD4	74769367	rs12887650	14	74741448	G	A	0.496933	0.0411999	0.0361687	0.254659	0.183729	0.0311495	3.67284e-09	0.224243	0.200496	0.26338	0.696925	5	-0.168729	0.617215	1.25138	0.844738	1.85376	1.251(0.845,1.854)	0.910824
	cg17860962	6	HSP90AB1	44214684	rs1875324	6	44223010	T	G	0.193252	0.0503725	0.0446099	0.258822	-0.309794	0.0387702	1.34363e-15	-0.1626	0.145429	0.263537	0.560179	5	-0.447641	0.122441	0.849931	0.639134	1.13025	0.85(0.639,1.13)	0.910824
	cg10784511	3	AGTR1	148426295	rs12695877	3	148427034	C	T	0.333333	0.0409078	0.0363011	0.259784	0.299032	0.0345319	4.73501e-18	0.136801	0.122419	0.263789	0.545373	4	-0.10314	0.376742	1.1466	0.902	1.45753	1.147(0.902,1.458)	0.910824
	cg23209878	13	F7	113739344	rs2236372	13	113731644	T	C	0.0685072	-0.0784367	0.0691248	0.256496	0.377109	0.0597049	2.68055e-10	-0.207995	0.186236	0.264066	0.66029	11	-0.573018	0.157028	0.812211	0.563822	1.17003	0.812(0.564,1.17)	0.910824
	cg17628491	17	RPTOR	78867822	rs7208146	17	78874167	T	C	0.216769	-0.0492662	0.0441129	0.264071	-1.54813	0.0188207	0	0.031823	0.0284969	0.264115	0.975854	20	-0.0240309	0.0876769	1.03233	0.976256	1.09164	1.032(0.976,1.092)	0.910824
	cg01109867	21	UBE2G2	46222390	rs2838691	21	46223571	T	C	0.157464	0.054259	0.0482952	0.261231	-0.420835	0.0437071	6.05936e-22	-0.128932	0.115539	0.264459	0.174126	20	-0.355388	0.0975244	0.879034	0.700901	1.10244	0.879(0.701,1.102)	0.910824
	cg07287107	15	EIF2AK4	40224001	rs1656895	15	40224107	A	G	0.307771	-0.043539	0.038963	0.263805	-0.593562	0.0356587	3.25502e-62	0.0733521	0.0657905	0.264879	0.736475	20	-0.0555973	0.202301	1.07611	0.94592	1.22422	1.076(0.946,1.224)	0.910824
	cg08035323	2	YWHAQ	9843525	rs11680429	2	9844178	A	G	0.335378	-0.0451102	0.0402792	0.26274	0.40421	0.0343204	5.0951e-32	-0.111601	0.100099	0.26489	0.167943	20	-0.307795	0.084593	0.894401	0.735066	1.08827	0.894(0.735,1.088)	0.910824
	cg20831708	10	SEC31B	102279373	rs3750632	10	102279295	C	G	0.192229	-0.0475021	0.0420634	0.258772	-0.264918	0.0388984	9.72481e-12	0.179309	0.160947	0.265242	0.728259	11	-0.136147	0.494765	1.19639	0.872714	1.64011	1.196(0.873,1.64)	0.910824
	cg16435808	2	TIA1	70475954	rs2592177	2	70475933	T	G	0.321063	0.0430918	0.0379965	0.256753	0.194365	0.0335639	7.001e-09	0.221706	0.199204	0.265727			-0.168734	0.612146	1.2482	0.844734	1.84438	1.248(0.845,1.844)	0.910824
	cg01072942	10	SEC31B	102279330	rs3750631	10	102279294	G	A	0.192229	-0.0475105	0.0420621	0.258673	-0.246801	0.0388347	2.08193e-10	0.192505	0.1731	0.266093	0.712761	10	-0.146771	0.531781	1.21228	0.863492	1.70196	1.212(0.863,1.702)	0.910824
	cg19645788	14	AKT1	105240170	rs77631658	14	105227822	G	A	0.189162	-0.0519769	0.0467514	0.266237	0.671617	0.0380734	1.21295e-69	-0.0773907	0.0697484	0.267185	0.99756	20	-0.214098	0.0593162	0.925528	0.80727	1.06111	0.926(0.807,1.061)	0.910824
	cg24902995	7	GET4	922165	rs7794185	7	898565	T	C	0.185072	-0.0520515	0.0460392	0.258227	0.244896	0.0427125	9.83278e-09	-0.212545	0.191615	0.26733	0.848979	6	-0.58811	0.16302	0.808524	0.555376	1.17706	0.809(0.555,1.177)	0.910824
	cg16516405	1	LBR	225655154	rs76374387	1	225655151	A	G	0.112474	-0.0718206	0.0646903	0.266904	-1.2854	0.0520068	7.20114e-135	0.0558741	0.0503778	0.267386	0.662857	20	-0.0428664	0.154615	1.05746	0.958039	1.16721	1.057(0.958,1.167)	0.910824
	cg24072166	1	PCSK9	55529107	rs2454215	1	55673828	A	G	0.225971	0.0449345	0.0401176	0.262684	0.252752	0.0362194	2.98664e-12	0.177781	0.160755	0.268763	0.103249	20	-0.137299	0.492861	1.19456	0.87171	1.63699	1.195(0.872,1.637)	0.910824
	cg18405544	5	PIK3R1	67615770	rs451157	5	67616407	G	A	0.266871	-0.0439934	0.0397664	0.268598	-1.13971	0.0281492	0	0.0386006	0.0349047	0.268777	0.514207	20	-0.0298126	0.107014	1.03936	0.970627	1.11295	1.039(0.971,1.113)	0.910824
	cg08269402	6	HLA-DRB1	32549631	rs9270567	6	32560801	G	T	0.431493	0.0604598	0.0546612	0.268691	1.12494	0.0240336	0	0.0537449	0.0486039	0.268825	0.0452551	20	-0.0415187	0.149009	1.05522	0.959331	1.16068	1.055(0.959,1.161)	0.910824
	cg12570429	17	MPO	56345839	rs2526378	17	56404349	G	A	0.474438	0.0387192	0.0345132	0.261919	-0.210948	0.0323962	7.44007e-11	-0.183549	0.166021	0.268909	0.452676	20	-0.50895	0.141852	0.832311	0.601126	1.15241	0.832(0.601,1.152)	0.910824
	cg05968904	7	FAM20C	194719	rs73671758	7	190734	T	G	0.522495	0.0411942	0.0365532	0.259757	0.185382	0.032733	1.48358e-08	0.222212	0.201043	0.269031	0.78405	7	-0.171832	0.616256	1.24884	0.84212	1.85198	1.249(0.842,1.852)	0.910824
	cg25638870	11	NOX4	89224717	rs2289125	11	89224453	A	C	0.221881	-0.0480811	0.0434991	0.269014	-1.16078	0.0311384	3.71764e-304	0.0414213	0.0374905	0.269225	0.584492	20	-0.0320601	0.114903	1.04229	0.968448	1.12176	1.042(0.968,1.122)	0.910824
	cg18296956	5	VTRNA1-1	140090936	rs2563305	5	140071735	G	A	0.186094	-0.048027	0.0429518	0.263498	0.270127	0.0389354	3.98166e-12	-0.177794	0.161058	0.269629	0.914779	17	-0.493468	0.13788	0.837115	0.610506	1.14784	0.837(0.611,1.148)	0.910824
	cg03820779	11	KCNQ1	2573972	rs3944148	11	2563137	T	C	0.120654	-0.0628368	0.0567582	0.268253	-0.589026	0.0519968	9.52211e-30	0.106679	0.0968185	0.270528	0.172987	8	-0.0830853	0.296443	1.11258	0.920273	1.34507	1.113(0.92,1.345)	0.910824
	cg10381520	10	ITGB1	33396942	rs10827191	10	33384641	A	G	0.358896	0.0406261	0.0364694	0.265289	0.25486	0.0341076	7.88477e-14	0.159406	0.144677	0.270548	0.668671	20	-0.124161	0.442973	1.17281	0.883238	1.55733	1.173(0.883,1.557)	0.910824
	cg13211008	7	ESYT2	158541253	rs710422	7	158546543	G	A	0.228016	-0.0456876	0.0414742	0.270639	1.53157	0.017681	0	-0.0298306	0.0270817	0.270678	0.607082	20	-0.0829107	0.0232495	0.97061	0.920433	1.02352	0.971(0.92,1.024)	0.910824
	cg04692870	22	CYP2D6	42525206	rs1058164	22	42525132	C	G	0.452965	0.0412014	0.0372841	0.269131	0.42674	0.0327016	6.39591e-39	0.0965493	0.0876824	0.270842	0.963685	20	-0.0753082	0.268407	1.10136	0.927458	1.30788	1.101(0.927,1.308)	0.910824
	cg01082199	11	NOX4	89224714	rs2289125	11	89224453	A	C	0.221881	-0.0480811	0.0434991	0.269014	0.44869	0.0380258	3.92088e-32	-0.107159	0.0973713	0.271107	0.568514	20	-0.298007	0.0836887	0.898383	0.742296	1.08729	0.898(0.742,1.087)	0.910824
	cg25080348	8	ASPH	62596090	rs10099866	8	62617691	A	C	0.513292	0.0382971	0.0343327	0.264649	0.209263	0.0312944	2.27908e-11	0.183009	0.166332	0.271215	0.168284	17	-0.143002	0.50902	1.20083	0.866753	1.66366	1.201(0.867,1.664)	0.910824
	cg05337636	17	RPTOR	78720537	rs7221823	17	78645538	A	T	0.308793	0.0427822	0.0382649	0.263544	-0.206278	0.0356678	7.32463e-09	-0.207401	0.188936	0.272323	0.660735	10	-0.577716	0.162914	0.812694	0.561179	1.17693	0.813(0.561,1.177)	0.910824
	cg24536244	11	BRSK2	1372638	rs4247481	11	1402629	A	T	0.45092	-0.0389444	0.0352899	0.269786	-0.327819	0.0323734	4.2288e-24	0.118798	0.108288	0.272615	0.205743	20	-0.0934465	0.331042	1.12614	0.910787	1.39242	1.126(0.911,1.392)	0.910824
	cg07841815	7	EPO	100318223	rs221790	7	100278282	G	C	0.406953	0.0387211	0.0350238	0.268915	-0.290506	0.0329255	1.11311e-18	-0.133288	0.121504	0.272647	0.20253	20	-0.371436	0.10486	0.875213	0.689743	1.11055	0.875(0.69,1.111)	0.910824
	cg25677261	15	PCSK6	102009856	rs1552948	15	101993989	T	C	0.305726	-0.0412468	0.0375698	0.27226	-0.724806	0.031646	4.27886e-116	0.0569074	0.0518937	0.272811	0.101711	20	-0.0448043	0.158619	1.05856	0.956185	1.17189	1.059(0.956,1.172)	0.910824
	cg04661709	9	DAB2IP	124360264	rs7869336	9	124365213	T	G	0.359918	-0.0392867	0.0356546	0.27052	0.359136	0.033257	3.48643e-27	-0.109392	0.0997944	0.273002	0.0325668	15	-0.304989	0.086205	0.896379	0.737131	1.09003	0.896(0.737,1.09)	0.910824
	cg07434008	17	RPTOR	78848766	rs6565484	17	78848856	T	C	0.498978	-0.0374734	0.0340682	0.271353	0.359901	0.0310866	5.36762e-31	-0.104121	0.0950862	0.273507	0.708387	20	-0.29049	0.082248	0.901116	0.747897	1.08572	0.901(0.748,1.086)	0.910824
	cg03012028	7	CRHR2	30739812	rs255112	7	30737133	G	A	0.345603	0.0397984	0.0362567	0.272342	0.514572	0.0327903	1.69386e-55	0.0773427	0.070632	0.273513	0.248919	12	-0.061096	0.215781	1.08041	0.940733	1.24083	1.08(0.941,1.241)	0.910824
	cg07380026	5	TERT	1296007	rs381949	5	1322468	A	G	0.404908	0.039282	0.035375	0.266806	0.222148	0.033776	4.79715e-11	0.176828	0.161494	0.273538	0.977063	16	-0.1397	0.493356	1.19343	0.869619	1.6378	1.193(0.87,1.638)	0.910824
	cg25909396	17	PRKCA	64300729	rs78510726	17	64312983	A	G	0.248466	0.0450869	0.0405723	0.266451	0.227422	0.0362259	3.43203e-10	0.198252	0.181174	0.273841	0.584443	7	-0.156849	0.553353	1.21927	0.854833	1.73907	1.219(0.855,1.739)	0.910824
	cg10671054	12	TNFRSF1A	6456430	rs2228576	12	6457062	T	C	0.305726	-0.0453209	0.0409039	0.267867	0.235737	0.0338539	3.32266e-12	-0.192252	0.175698	0.273858	0.794918	7	-0.53662	0.152116	0.825099	0.584721	1.1643	0.825(0.585,1.164)	0.910824
	cg18749617	15	PCSK6	102028637	rs1552948	15	101993989	T	C	0.305726	-0.0412468	0.0375698	0.27226	0.453667	0.0343334	7.32479e-40	-0.0909187	0.0830989	0.27391	0.119249	20	-0.253793	0.0719551	0.913092	0.775853	1.07461	0.913(0.776,1.075)	0.910824
	cg02891314	5	MAPK9	179741120	rs55901738	5	179741374	A	C	0.392638	-0.0393568	0.0359711	0.2739	-1.20822	0.0222305	0	0.0325742	0.029778	0.273998	0.572596	20	-0.0257907	0.0909391	1.03311	0.974539	1.0952	1.033(0.975,1.095)	0.910824
	cg23248424	5	MAPK9	179741104	rs55901738	5	179741374	A	C	0.392638	-0.0393568	0.0359711	0.2739	-1.19808	0.022676	0	0.0328499	0.0300304	0.274003	0.569152	20	-0.0260097	0.0917095	1.0334	0.974326	1.09605	1.033(0.974,1.096)	0.910824
	cg13944838	5	MAPK9	179740914	rs55901738	5	179741374	A	C	0.392638	-0.0393568	0.0359711	0.2739	-1.15491	0.0236794	0	0.0340778	0.0311541	0.274021	0.151462	20	-0.0269842	0.0951398	1.03467	0.973377	1.09981	1.035(0.973,1.1)	0.910824
	cg23221052	5	MAPK9	179740743	rs55901738	5	179741374	A	C	0.392638	-0.0393568	0.0359711	0.2739	-1.13444	0.0243684	0	0.0346928	0.031717	0.274033	0.288287	20	-0.0274725	0.0968581	1.0353	0.972901	1.1017	1.035(0.973,1.102)	0.910824
	cg11920449	6	CDKN1A	36645608	rs2395655	6	36645696	G	A	0.380368	0.0394067	0.0360231	0.273987	-0.947178	0.0280628	9.96368e-250	-0.0416043	0.038052	0.274238	0.899263	20	-0.116186	0.0329776	0.959249	0.890309	1.03353	0.959(0.89,1.034)	0.910824
	cg24425727	6	CDKN1A	36645648	rs2395655	6	36645696	G	A	0.380368	0.0394067	0.0360231	0.273987	-0.921574	0.0286891	2.11912e-226	-0.0427602	0.0391113	0.274265	0.894701	20	-0.119418	0.0338979	0.958141	0.887436	1.03448	0.958(0.887,1.034)	0.910824
	cg15848620	12	OS9	58087721	rs2928064	12	58085198	T	C	0.315951	-0.0402595	0.0364439	0.26929	0.254298	0.0335637	3.54776e-14	-0.158316	0.144827	0.274332	0.727067	18	-0.442177	0.125545	0.85358	0.642636	1.13377	0.854(0.643,1.134)	0.910824
	cg01276466	12	IFNG	68542151	rs10878774	12	68580272	G	A	0.412065	-0.0386057	0.0351059	0.271466	-0.32459	0.0323886	1.22323e-23	0.118937	0.108804	0.274337	0.816594	20	-0.0943188	0.332193	1.1263	0.909993	1.39402	1.126(0.91,1.394)	0.910824
	cg14831085	15	PCSK6	101991828	rs1552948	15	101993989	T	C	0.305726	-0.0412468	0.0375698	0.27226	-0.402192	0.0343407	1.10864e-31	0.102555	0.093822	0.274359	0.0696872	18	-0.0813361	0.286446	1.108	0.921884	1.33169	1.108(0.922,1.332)	0.910824
	cg26071806	7	EPO	100318239	rs221790	7	100278282	G	C	0.406953	0.0387211	0.0350238	0.268915	-0.236295	0.0326197	4.35857e-13	-0.163867	0.149937	0.274434	0.312531	20	-0.457744	0.13001	0.848855	0.63271	1.13884	0.849(0.633,1.139)	0.910824
	cg12089079	13	HTR2A	47470350	rs4942579	13	47433844	G	C	0.192229	0.0574807	0.0524152	0.272799	-0.577479	0.043876	1.45923e-39	-0.0995373	0.0910802	0.274458	0.580135	13	-0.278054	0.0789799	0.905256	0.757256	1.08218	0.905(0.757,1.082)	0.910824
	cg15474579	6	CDKN1A	36645812	rs762624	6	36645588	C	A	0.240286	0.0435335	0.0397765	0.273756	-0.557486	0.0361977	1.6079e-53	-0.078089	0.0715296	0.274964	0.693223	20	-0.218287	0.062109	0.924882	0.803895	1.06408	0.925(0.804,1.064)	0.910824
	cg24981058	11	NOX4	89224736	rs2289125	11	89224453	A	C	0.221881	-0.0480811	0.0434991	0.269014	-0.267055	0.0386502	4.86259e-12	0.180042	0.164955	0.275072	0.439949	12	-0.14327	0.503354	1.19727	0.86652	1.65426	1.197(0.867,1.654)	0.910824
	cg26271591	2	NFE2L2	178125956	rs17647588	2	178136077	T	C	0.380368	-0.0401227	0.0366818	0.274041	-0.508525	0.0331277	3.51778e-53	0.0789002	0.0723166	0.275256	0.889518	20	-0.0628403	0.220641	1.0821	0.939093	1.24688	1.082(0.939,1.247)	0.910824
	cg14871010	14	LGALS3	55603225	rs2075602	14	55609774	G	A	0.441718	0.0405472	0.0365738	0.267585	0.190813	0.0318994	2.20808e-09	0.212497	0.194938	0.27568	0.785487	15	-0.169581	0.594575	1.23676	0.844018	1.81226	1.237(0.844,1.812)	0.910824
	cg14794799	5	MAPK9	179740188	rs55901738	5	179741374	A	C	0.392638	-0.0393568	0.0359711	0.2739	0.392925	0.0334428	7.13226e-32	-0.100164	0.091943	0.275973	0.720541	20	-0.280372	0.0800443	0.904689	0.755502	1.08334	0.905(0.756,1.083)	0.910824
	cg03567652	19	LDLR	11242272	rs2738464	19	11242307	G	C	0.117587	0.0590777	0.0541618	0.275377	-0.934612	0.0480559	3.00538e-84	-0.0632109	0.0580422	0.276131	0.52267	20	-0.176974	0.0505518	0.938745	0.837802	1.05185	0.939(0.838,1.052)	0.910824
	cg10752315	3	EIF2A	150238463	rs13326592	3	150240342	G	T	0.310838	-0.0421143	0.038471	0.273647	0.359012	0.0348229	6.37253e-25	-0.117306	0.10776	0.276338	0.992347	20	-0.328516	0.0939036	0.889313	0.719992	1.09845	0.889(0.72,1.098)	0.910824
	cg24524396	6	ELOVL5	53214019	rs209503	6	53189459	G	T	0.366053	-0.0400511	0.0362552	0.26929	0.209751	0.0329337	1.90395e-10	-0.190946	0.17543	0.276398	0.792629	18	-0.534789	0.152897	0.826177	0.585793	1.1652	0.826(0.586,1.165)	0.910824
	cg03151554	15	BCL2L10	52405123	rs3794543	15	52441524	T	C	0.138037	-0.0534025	0.0486545	0.272385	-0.370694	0.0442488	5.40628e-17	0.144061	0.132374	0.276469	0.192501	20	-0.115392	0.403514	1.15495	0.891017	1.49708	1.155(0.891,1.497)	0.910824
	cg16304521	14	TRA	22191827	rs7145641	14	22117475	A	G	0.314928	-0.0409443	0.0369596	0.267943	-0.200406	0.0346665	7.42698e-09	0.204307	0.187779	0.276589			-0.16374	0.572354	1.22667	0.848963	1.77243	1.227(0.849,1.772)	0.910824
	cg21857885	14	RTN1	60337864	rs74061335	14	60338809	T	C	0.101227	0.0610096	0.0559838	0.275814	-1.0671	0.0562096	2.29928e-80	-0.0571732	0.0525499	0.276604	0.203255	20	-0.160171	0.0458246	0.94443	0.851998	1.04689	0.944(0.852,1.047)	0.910824
	cg08214808	11	MAPK8IP1	45922166	rs17787136	11	45894636	G	C	0.239264	-0.0459963	0.042276	0.276595	0.878031	0.0342715	9.16476e-145	-0.0523857	0.048192	0.277028	0.104162	20	-0.146842	0.0420706	0.948963	0.86343	1.04297	0.949(0.863,1.043)	0.910824
	cg03714916	6	CDKN1A	36645886	rs2395655	6	36645696	G	A	0.380368	0.0394067	0.0360231	0.273987	-0.294896	0.0329585	3.63665e-19	-0.133629	0.123065	0.277549	0.79031	20	-0.374836	0.107578	0.874915	0.687402	1.11358	0.875(0.687,1.114)	0.910824
	cg18963239	17	ATP2A3	3861144	rs3826482	17	3860356	T	A	0.431493	0.0409459	0.0373943	0.273527	0.259823	0.0319837	4.52541e-16	0.157592	0.145224	0.27785	0.933547	20	-0.127047	0.442231	1.17069	0.880692	1.55618	1.171(0.881,1.556)	0.910824
	cg07528484	11	MAPK8IP1	45907808	rs17787136	11	45894636	G	C	0.239264	-0.0459963	0.042276	0.276595	0.550094	0.036789	1.49634e-50	-0.0836154	0.0770555	0.277863	0.343725	19	-0.234644	0.0674134	0.919785	0.790852	1.06974	0.92(0.791,1.07)	0.910824
	cg08690876	22	CYB5R3	43040721	rs1109585	22	43040921	C	T	0.486708	0.0374171	0.0344418	0.277309	-0.617065	0.0309365	1.61844e-88	-0.0606371	0.0558983	0.278021	0.150518	20	-0.170198	0.0489236	0.941165	0.843498	1.05014	0.941(0.843,1.05)	0.910824
	cg13809236	11	MAPK8IP1	45908036	rs17787136	11	45894636	G	C	0.239264	-0.0459963	0.042276	0.276595	0.474505	0.0375314	1.22496e-36	-0.0969354	0.0894243	0.278367	0.19527	15	-0.272207	0.0783362	0.907615	0.761697	1.08149	0.908(0.762,1.081)	0.910824
	cg26361533	12	CACNA1C	2445561	rs3819530	12	2436797	A	G	0.403885	0.0392886	0.0359131	0.273959	-0.249132	0.0329652	4.11162e-14	-0.157702	0.145655	0.27894	0.603794	11	-0.443186	0.127782	0.854104	0.641988	1.13631	0.854(0.642,1.136)	0.910824
	cg09075610	11	MAPK8IP1	45923319	rs17787136	11	45894636	G	C	0.239264	-0.0459963	0.042276	0.276595	0.411756	0.0376366	7.39516e-28	-0.111708	0.103179	0.27896	0.23876	12	-0.313939	0.0905228	0.894305	0.730564	1.09475	0.894(0.731,1.095)	0.910824
	cg15022015	17	RPTOR	78869527	rs7225783	17	78874350	G	A	0.216769	-0.0486114	0.0440997	0.270329	0.218366	0.0382595	1.14654e-08	-0.222614	0.205685	0.279117	0.986308	7	-0.625757	0.180529	0.800424	0.534857	1.19785	0.8(0.535,1.198)	0.910824
	cg23725454	11	GSTP1	67350195	rs694746	11	67350720	C	G	0.49182	0.0372784	0.0343843	0.27829	0.579661	0.0316613	7.11938e-75	0.0643107	0.0594218	0.279131	0.354804	20	-0.052156	0.180777	1.06642	0.949181	1.19815	1.066(0.949,1.198)	0.910824
	cg03424844	1	EDEM3	184641175	rs6663178	1	184661642	A	G	0.47546	0.0385292	0.0349943	0.270892	-0.182945	0.0320696	1.16597e-08	-0.210605	0.194814	0.27967	0.17667	4	-0.59244	0.17123	0.810094	0.552976	1.18676	0.81(0.553,1.187)	0.910824
	cg02568083	8	TRAM1	71516655	rs448036	8	71570555	A	G	0.0644172	0.0785394	0.0714248	0.271503	0.371334	0.0638092	5.90435e-09	0.211506	0.19575	0.279924	0.246964	5	-0.172164	0.595176	1.23554	0.841841	1.81335	1.236(0.842,1.813)	0.910824
	cg09641325	7	AKR1B1	134157797	rs2974975	7	134134135	G	A	0.292434	0.0449768	0.0411505	0.274401	-0.242586	0.0351076	4.85401e-12	-0.185405	0.171741	0.280338	0.193143	20	-0.522017	0.151207	0.830768	0.593322	1.16324	0.831(0.593,1.163)	0.910824
	cg23750151	6	TAP2	32808504	rs9276815	6	32825507	T	C	0.304703	-0.0395687	0.0360012	0.271728	-0.197886	0.0344208	8.97564e-09	0.199957	0.185224	0.280346	0.387145	13	-0.163082	0.562996	1.22135	0.849521	1.75593	1.221(0.85,1.756)	0.910824
	cg06433467	5	PIK3R1	67730071	rs116600738	5	67730110	A	G	0.0603272	0.0734501	0.0679509	0.279729	1.34963	0.0657248	1.05746e-93	0.0544224	0.0504175	0.280394	0.715394	20	-0.0443959	0.153241	1.05593	0.956575	1.16561	1.056(0.957,1.166)	0.910824
	cg03568064	11	MAPK8IP1	45907500	rs17787136	11	45894636	G	C	0.239264	-0.0459963	0.042276	0.276595	0.227467	0.029663	1.74182e-14	-0.202211	0.187717	0.281386	0.284592	9	-0.570136	0.165714	0.816923	0.565448	1.18024	0.817(0.565,1.18)	0.910824
	cg22569340	19	RTN2	46000819	rs8110916	19	46006212	A	G	0.360941	0.0410124	0.037418	0.273053	-0.194953	0.0337457	7.59895e-09	-0.210371	0.195357	0.281548	0.0990259	10	-0.593271	0.172529	0.810284	0.552517	1.18831	0.81(0.553,1.188)	0.910824
	cg01770232	7	IL6	22766155	rs1800796	7	22766246	C	G	0.0490798	-0.080268	0.0744822	0.281176	1.46113	0.0624146	3.37412e-121	-0.0549356	0.0510297	0.281686	0.965993	16	-0.154954	0.0450826	0.946546	0.856455	1.04611	0.947(0.856,1.046)	0.910824
	cg24390590	15	PCSK6	101991512	rs1552952	15	101994302	G	A	0.305726	-0.0407782	0.0377851	0.280493	-0.435813	0.0346042	2.27213e-36	0.0935682	0.0870181	0.282253	0.131325	20	-0.0769873	0.264124	1.09809	0.925902	1.30229	1.098(0.926,1.302)	0.910824
	cg15681853	15	FURIN	91388648	rs4331318	15	91582257	T	C	0.0470348	-0.102601	0.0950371	0.280327	-0.800214	0.0693356	8.18105e-31	0.128217	0.119283	0.282422	0.601357	6	-0.105578	0.362012	1.1368	0.899805	1.43622	1.137(0.9,1.436)	0.910824
	cg10010898	16	PDIA2	339598	rs214249	16	348687	G	T	0.378323	-0.038281	0.0353005	0.278173	0.259307	0.0324985	1.47482e-15	-0.147628	0.137385	0.282575	0.0708456	20	-0.416903	0.121647	0.862752	0.659085	1.12935	0.863(0.659,1.129)	0.910824
	cg00854166	7	EPO	100318718	rs475339	7	100316367	T	G	0.406953	0.0396536	0.0363272	0.275023	-0.19734	0.0327882	1.75899e-09	-0.200941	0.187088	0.282802	0.485178	9	-0.567633	0.165751	0.817961	0.566865	1.18028	0.818(0.567,1.18)	0.910824
	cg00524289	1	EPHX1	225996377	rs4653436	1	225995211	A	G	0.331288	-0.0396781	0.0366963	0.279584	0.322392	0.0347422	1.70213e-20	-0.123074	0.114595	0.282828	0.705838	18	-0.34768	0.101532	0.884198	0.706325	1.10687	0.884(0.706,1.107)	0.910824
	cg06142740	2	PPP1CB	28973577	rs7562170	2	28943516	C	T	0.287321	0.0399165	0.0370047	0.280727	0.352006	0.0344202	1.50519e-24	0.113397	0.105708	0.283389	0.601601	20	-0.0937907	0.320585	1.12008	0.910473	1.37793	1.12(0.91,1.378)	0.910824
	cg03018058	2	RHBDD1	227700114	rs61166131	2	227759455	C	A	0.170757	-0.0495037	0.0458479	0.28026	-0.386757	0.0421598	4.57464e-20	0.127997	0.119363	0.28357	0.97863	12	-0.105954	0.361948	1.13655	0.899466	1.43612	1.137(0.899,1.436)	0.910824
	cg10693767	17	RPTOR	78773124	rs72852801	17	78773088	A	G	0.0644172	-0.0785672	0.0725863	0.279076	0.468782	0.0604613	8.94495e-15	-0.167599	0.156342	0.28372	0.968019	6	-0.474029	0.138831	0.845693	0.622489	1.14893	0.846(0.622,1.149)	0.910824
	cg13685833	1	SCP2	53393034	rs12040433	1	53232766	G	A	0.337423	0.041274	0.0383734	0.282111	0.42126	0.0323123	7.52168e-39	0.0979775	0.0914014	0.283744	0.0206256	20	-0.0811692	0.277124	1.10294	0.922038	1.31933	1.103(0.922,1.319)	0.910824
	cg14688342	7	EGFR	55147074	rs7780270	7	55151886	T	G	0.485685	-0.0373888	0.0344992	0.278473	0.228861	0.0321249	1.04767e-12	-0.163369	0.152478	0.283977	0.341649	14	-0.462226	0.135488	0.849278	0.62988	1.1451	0.849(0.63,1.145)	0.910824
	cg06233593	16	PDIA2	337645	rs214247	16	349221	C	T	0.380368	-0.0381185	0.0352626	0.279702	0.270063	0.0335288	7.97086e-16	-0.141147	0.131742	0.283997	0.0373785	20	-0.399361	0.117067	0.868362	0.670748	1.1242	0.868(0.671,1.124)	0.910824
	cg07995438	11	GSTP1	67349309	rs7952081	11	67324933	A	G	0.407975	-0.0384322	0.0355455	0.279602	-0.249471	0.0321365	8.30331e-15	0.154055	0.143859	0.284225	0.375959	20	-0.127909	0.436019	1.16656	0.879934	1.54654	1.167(0.88,1.547)	0.910824
	cg20950843	22	CYB5R3	43044387	rs5751323	22	43057833	T	C	0.484663	0.0370804	0.0345274	0.282849	0.429392	0.0322423	1.82761e-40	0.0863556	0.080671	0.28441	0.249843	20	-0.0717596	0.244471	1.09019	0.930755	1.27695	1.09(0.931,1.277)	0.910824
	cg20102019	20	RRBP1	17592922	rs6080761	20	17629162	A	G	0.436605	0.0376958	0.0351906	0.284084	-0.817337	0.0291635	7.83029e-173	-0.0461202	0.0430866	0.284436	0.25722	20	-0.13057	0.0383295	0.954927	0.877595	1.03907	0.955(0.878,1.039)	0.910824
	cg01938018	1	NPHS2	179545425	rs1410592	1	179520506	G	A	0.382413	-0.0387318	0.0359657	0.281521	0.318705	0.0332885	1.0281e-21	-0.121529	0.113561	0.284547	0.012008	20	-0.344109	0.101051	0.885565	0.708852	1.10633	0.886(0.709,1.106)	0.910824
	cg26729380	6	TNF	31543655	rs1799724	6	31542482	T	C	0.093047	0.055116	0.0512493	0.282174	-0.687487	0.0637429	4.03862e-27	-0.0801703	0.0749155	0.284555	0.734567	9	-0.227005	0.0666641	0.922959	0.796917	1.06894	0.923(0.797,1.069)	0.910824
	cg08198851	6	TXNDC5	7847437	rs267195	6	7847928	T	C	0.392638	0.0378635	0.035387	0.284627	-1.27257	0.0190686	0	-0.0297536	0.0278111	0.284689	0.86013	20	-0.0842634	0.0247562	0.970685	0.919189	1.02507	0.971(0.919,1.025)	0.910824
	cg13177873	20	RRBP1	17661522	rs6080761	20	17629162	A	G	0.436605	0.0376958	0.0351906	0.284084	-0.661381	0.0311315	3.68614e-100	-0.0569956	0.0532753	0.284695	0.445057	20	-0.161415	0.047424	0.944598	0.850939	1.04857	0.945(0.851,1.049)	0.910824
	cg05141787	11	TH	2193284	rs2070762	11	2186335	G	A	0.472393	0.0454791	0.0423485	0.282857	0.384167	0.0316191	5.74779e-34	0.118384	0.110664	0.28473	0.594369	20	-0.0985174	0.335285	1.12568	0.90618	1.39834	1.126(0.906,1.398)	0.910824
	cg02451508	20	RRBP1	17595472	rs6080761	20	17629162	A	G	0.436605	0.0376958	0.0351906	0.284084	-0.633647	0.0315277	7.66747e-90	-0.0594902	0.0556154	0.284767	0.425953	20	-0.168496	0.049516	0.942245	0.844934	1.05076	0.942(0.845,1.051)	0.910824
	cg09673807	6	ITPR3	33575719	rs7768202	6	33598284	T	C	0.243354	-0.0450886	0.0413523	0.275559	-0.211699	0.0386011	4.15178e-08	0.212984	0.199159	0.28488	0.616737	5	-0.177368	0.603336	1.23736	0.837472	1.82821	1.237(0.837,1.828)	0.910824
	cg07512258	10	CAMK2G	75619420	rs2675668	10	75636148	G	A	0.4182	-0.0379593	0.0352476	0.28151	-0.278815	0.0324009	7.62113e-18	0.136145	0.127405	0.285251	0.102753	20	-0.113569	0.385859	1.14585	0.892643	1.47088	1.146(0.893,1.471)	0.910824
	cg00417151	20	RRBP1	17598356	rs6080761	20	17629162	A	G	0.436605	0.0376958	0.0351906	0.284084	-0.487625	0.0325695	1.12228e-50	-0.0773049	0.0723518	0.285314	0.287277	20	-0.219114	0.0645046	0.925608	0.80323	1.06663	0.926(0.803,1.067)	0.910824
	cg00659931	15	PCSK6	102010125	rs1552952	15	101994302	G	A	0.305726	-0.0407782	0.0377851	0.280493	-0.259094	0.0344495	5.43705e-14	0.157388	0.147329	0.285398	0.0674824	11	-0.131377	0.446153	1.17045	0.876887	1.56229	1.17(0.877,1.562)	0.910824
	cg01877155	1	DHCR24	55307556	rs35953780	1	55296114	G	C	0.223926	0.0456003	0.0425999	0.284424	-0.64779	0.0386868	6.21252e-63	-0.0703937	0.0658961	0.285406	0.642195	20	-0.19955	0.0587627	0.932027	0.819099	1.06052	0.932(0.819,1.061)	0.910824
	cg26417985	20	RRBP1	17633832	rs6080761	20	17629162	A	G	0.436605	0.0376958	0.0351906	0.284084	-0.453752	0.0324328	1.78054e-44	-0.0830757	0.0777816	0.285492	0.374987	20	-0.235528	0.0693762	0.920281	0.790154	1.07184	0.92(0.79,1.072)	0.910824
	cg05955436	20	RRBP1	17660838	rs6080761	20	17629162	A	G	0.436605	0.0376958	0.0351906	0.284084	-0.440257	0.0325336	1.00739e-41	-0.0856222	0.0801819	0.285588	0.250825	20	-0.242779	0.0715343	0.917941	0.784445	1.07416	0.918(0.784,1.074)	0.910824
	cg06449334	20	RRBP1	17593441	rs6080761	20	17629162	A	G	0.436605	0.0376958	0.0351906	0.284084	-0.440128	0.0326716	2.30885e-41	-0.0856473	0.0802077	0.285602	0.256766	20	-0.242854	0.0715598	0.917918	0.784386	1.07418	0.918(0.784,1.074)	0.910824
	cg00523683	17	RPTOR	78748471	rs12452137	17	78755149	G	A	0.278119	0.0428794	0.0401184	0.28515	0.784206	0.0336381	3.27014e-120	0.0546788	0.0512118	0.285656	0.80971	20	-0.0456963	0.155054	1.0562	0.955332	1.16772	1.056(0.955,1.168)	0.910824
	cg16267236	3	TF	133464463	rs8177184	3	133464496	G	A	0.149284	0.0518184	0.0479836	0.280178	0.30384	0.0438818	4.38903e-12	0.170545	0.159833	0.285963	0.44155	5	-0.142728	0.483818	1.18595	0.86699	1.62226	1.186(0.867,1.622)	0.910824
	cg02385173	11	ACER3	76571534	rs113153306	11	76645180	T	C	0.123722	-0.0704963	0.0656629	0.282998	0.490932	0.053425	3.95848e-20	-0.143597	0.134661	0.286263	0.116902	5	-0.407533	0.120339	0.866237	0.66529	1.12788	0.866(0.665,1.128)	0.910824
	cg22107710	2	RTN4	55289198	rs6707036	2	55287327	G	A	0.289366	-0.0403489	0.0376834	0.28429	-0.388323	0.033873	1.99882e-30	0.103905	0.0974637	0.286382	0.326135	20	-0.0871239	0.294934	1.1095	0.916564	1.34304	1.109(0.917,1.343)	0.910824
	cg26161708	20	RRBP1	17595448	rs3790316	20	17629439	G	A	0.436605	0.0375876	0.035197	0.285556	-0.547561	0.0318213	2.33789e-66	-0.0686456	0.0644032	0.286482	0.302045	20	-0.194876	0.0575847	0.933658	0.822937	1.05927	0.934(0.823,1.059)	0.910824
	cg23698271	10	TIAL1	121346762	rs11199030	10	121346763	A	G	0.157464	0.0465875	0.043707	0.286466	-1.61073	0.0208395	0	-0.0289232	0.0271375	0.286512	0.175151	20	-0.0821127	0.0242663	0.971491	0.921168	1.02456	0.971(0.921,1.025)	0.910824
	cg11705651	21	UBE2G2	46220932	rs4818737	21	46259360	A	G	0.249489	0.0451242	0.0419726	0.282336	0.312507	0.0386897	6.62318e-16	0.144394	0.135494	0.286565	0.0539202	20	-0.121174	0.409962	1.15534	0.88588	1.50676	1.155(0.886,1.507)	0.910824
	cg21644468	11	TH	2193293	rs2070762	11	2186335	G	A	0.472393	0.0454791	0.0423485	0.282857	0.258922	0.030674	3.14368e-17	0.175648	0.164875	0.286724	0.505791	20	-0.147507	0.498803	1.19202	0.862856	1.64675	1.192(0.863,1.647)	0.910824
	cg22721256	6	HLA-A	29924407	rs116706170	6	29908415	A	G	0.091002	0.099265	0.0915112	0.278041	0.357807	0.063323	1.59975e-08	0.277426	0.260426	0.286749	0.142294	3	-0.233009	0.787861	1.31973	0.792146	2.19869	1.32(0.792,2.199)	0.910824
	cg00733978	7	CD36	80352237	rs74880111	7	80370315	C	A	0.0644172	-0.0844426	0.0787365	0.283508	-0.650724	0.0716599	1.0785e-19	0.129767	0.121839	0.286845	0.361057	13	-0.109037	0.368571	1.13856	0.896697	1.44567	1.139(0.897,1.446)	0.910824
	cg01923020	11	BACE1	117185292	rs2445939	11	117186073	T	A	0.358896	0.040884	0.0382376	0.284975	-0.38327	0.0329502	2.84098e-31	-0.106672	0.100187	0.287002	0.105383	20	-0.303039	0.0896945	0.89882	0.738571	1.09384	0.899(0.739,1.094)	0.910824
	cg27168573	12	PXN	120700929	rs11065056	12	120670379	C	A	0.144172	-0.0614692	0.0574476	0.284617	0.480494	0.0463418	3.44976e-25	-0.127929	0.120194	0.287169	0.268191	20	-0.363509	0.107651	0.879916	0.695232	1.11366	0.88(0.695,1.114)	0.910824
	cg07600623	7	ESYT2	158533890	rs78357128	7	158533891	A	G	0.0613497	0.0868873	0.0812662	0.284994	-0.751229	0.0695785	3.56167e-27	-0.11566	0.108707	0.287345	0.51515	17	-0.328726	0.0974057	0.890778	0.71984	1.10231	0.891(0.72,1.102)	0.910824
	cg00520135	15	TPM1	63333846	rs3809566	15	63333724	A	G	0.325153	-0.0388086	0.03646	0.28714	0.903316	0.0323439	1.20361e-171	-0.0429624	0.0403917	0.28749	0.231496	20	-0.12213	0.0362053	0.957947	0.885033	1.03687	0.958(0.885,1.037)	0.910824
	cg08198488	15	TPM1	63333792	rs3809566	15	63333724	A	G	0.325153	-0.0388086	0.03646	0.28714	0.795318	0.033323	6.75525e-126	-0.0487964	0.0458889	0.287619	0.261171	20	-0.138739	0.0411458	0.952375	0.870455	1.042	0.952(0.87,1.042)	0.910824
	cg26603275	5	TERT	1298965	rs37002	5	1356944	T	C	0.506135	0.0412237	0.038269	0.281386	0.218232	0.0332759	5.44362e-11	0.188899	0.177709	0.287797	0.999735	15	-0.159411	0.537209	1.20792	0.852646	1.71122	1.208(0.853,1.711)	0.910824
	cg25963429	11	CREB3L1	46301410	rs34771037	11	46300911	G	A	0.330266	-0.0416319	0.0385672	0.28038	0.208498	0.0343339	1.25812e-09	-0.199675	0.187876	0.287871	0.878716	4	-0.567912	0.168562	0.818997	0.566708	1.1836	0.819(0.567,1.184)	0.910824
	cg18711369	17	ORMDL3	38081186	rs4065275	17	38080865	G	A	0.492843	-0.0370116	0.0348025	0.287567	-0.675934	0.0306156	5.13645e-108	0.0547562	0.0515477	0.288125	0.0827987	20	-0.0462773	0.15579	1.05628	0.954777	1.16858	1.056(0.955,1.169)	0.910824
	cg11656478	2	CYP1B1	38297759	rs4670813	2	38317710	A	G	0.497955	-0.0371444	0.0347164	0.284647	0.28419	0.032222	1.14706e-18	-0.130703	0.123055	0.288167	0.0355892	20	-0.371891	0.110485	0.877478	0.68943	1.11682	0.877(0.689,1.117)	0.910824
	cg24483493	15	TPM1	63333476	rs3809566	15	63333724	A	G	0.325153	-0.0388086	0.03646	0.28714	0.498471	0.0353425	3.58869e-45	-0.0778553	0.0733517	0.288509	0.274096	20	-0.221625	0.065914	0.925098	0.801216	1.06813	0.925(0.801,1.068)	0.910824
	cg12632411	20	RRBP1	17595355	rs6080761	20	17629162	A	G	0.436605	0.0376958	0.0351906	0.284084	-0.249476	0.032398	1.3569e-14	-0.1511	0.142416	0.288702	0.304847	20	-0.430235	0.128035	0.859762	0.650356	1.13659	0.86(0.65,1.137)	0.910824
	cg13549638	17	RPTOR	78860076	rs55880615	17	78867906	A	G	0.207566	-0.0475383	0.044663	0.287158	0.496602	0.0382735	1.69394e-38	-0.0957271	0.0902393	0.288775	0.884306	20	-0.272596	0.0811419	0.908712	0.7614	1.08452	0.909(0.761,1.085)	0.910824
	cg19021383	11	MAPK8IP1	45922184	rs4756036	11	45878070	C	G	0.224949	-0.0440517	0.0415076	0.288557	0.87039	0.0353952	1.59272e-133	-0.0506114	0.0477329	0.289006	0.0755189	20	-0.144168	0.0429451	0.950648	0.865742	1.04388	0.951(0.866,1.044)	0.910824
	cg16660971	17	RPTOR	78860029	rs55880615	17	78867906	A	G	0.207566	-0.0475383	0.044663	0.287158	0.464552	0.0386588	2.90279e-33	-0.102331	0.0965185	0.289042	0.890017	20	-0.291507	0.0868453	0.902731	0.747137	1.09073	0.903(0.747,1.091)	0.910824
	cg11808100	6	HLA-A	29910755	rs17369215	6	29647715	T	C	0.242331	0.0428247	0.0404516	0.289752	0.747082	0.0369273	5.20528e-91	0.0573227	0.0542202	0.290411	0.956251	20	-0.0489489	0.163594	1.059	0.95223	1.17774	1.059(0.952,1.178)	0.910824
	cg10650821	6	TNF	31543686	rs1799724	6	31542482	T	C	0.093047	0.055116	0.0512493	0.282174	-0.365022	0.0646347	1.62833e-08	-0.150994	0.142924	0.290756	0.26005	3	-0.431125	0.129137	0.859853	0.649778	1.13785	0.86(0.65,1.138)	0.910824
	cg16163826	11	KCNJ5	128756444	rs10736569	11	128756564	T	C	0.0961145	-0.0595943	0.055996	0.287211	-0.455284	0.0521652	2.59816e-18	0.130895	0.123902	0.29077			-0.111953	0.373743	1.13985	0.894086	1.45316	1.14(0.894,1.453)	0.910824
	cg15700009	11	LDHA	18415711	rs10766473	11	18401531	G	A	0.416155	-0.0368601	0.0347662	0.289041	-0.40262	0.0327367	9.1985e-35	0.0915507	0.0866702	0.290826	0.321085	20	-0.0783229	0.261424	1.09587	0.924666	1.29878	1.096(0.925,1.299)	0.910824
	cg08322244	17	VAMP2	8066669	rs9899533	17	8068045	C	G	0.339468	0.0386374	0.0365784	0.290836	-1.11908	0.0253312	0	-0.0345261	0.0326955	0.290973	0.157064	20	-0.0986093	0.0295571	0.966063	0.906097	1.03	0.966(0.906,1.03)	0.910824
	cg27343900	5	ERGIC1	172331791	rs17660328	5	172340822	C	T	0.302658	-0.041175	0.038698	0.287325	0.309829	0.0365278	2.21352e-17	-0.132896	0.12588	0.29109	0.259564	20	-0.379621	0.113829	0.875556	0.684121	1.12056	0.876(0.684,1.121)	0.910824
	cg18861547	1	HSPG2	22196887	rs7528670	1	22197940	G	A	0.210634	-0.0439435	0.0415972	0.290783	0.870718	0.0353829	1.02595e-133	-0.0504681	0.0478174	0.291227	0.664527	20	-0.14419	0.043254	0.950784	0.865723	1.0442	0.951(0.866,1.044)	0.910824
	cg07126783	17	RPTOR	78800767	rs12452137	17	78755149	G	A	0.278119	0.0428794	0.0401184	0.28515	0.246218	0.0375939	5.77653e-11	0.174152	0.165094	0.291486	0.838069	14	-0.149432	0.497736	1.19024	0.861197	1.64499	1.19(0.861,1.645)	0.910824
	cg19670883	11	KCNQ1	2502357	rs11604980	11	2494017	T	C	0.215746	0.0470974	0.044184	0.286452	-0.275283	0.0387656	1.23654e-12	-0.171087	0.162302	0.291825	0.852184	20	-0.489199	0.147025	0.842748	0.613117	1.15838	0.843(0.613,1.158)	0.910824
	cg02293118	7	CAMK2B	44349704	rs79592059	7	44356800	A	G	0.153374	-0.0532577	0.050158	0.288327	0.371354	0.0423284	1.73715e-18	-0.143415	0.136054	0.291834	0.696462	10	-0.410081	0.123251	0.866394	0.663597	1.13117	0.866(0.664,1.131)	0.910824
	cg10920316	5	HSPA9	137946599	rs34858014	5	137944006	C	T	0.448875	-0.0380466	0.0359754	0.29025	-0.428789	0.032968	1.12803e-38	0.0887305	0.084177	0.29184	0.432247	20	-0.0762564	0.253717	1.09279	0.926579	1.28881	1.093(0.927,1.289)	0.910824
	cg05361096	12	AQP2	50349307	rs10875989	12	50351075	C	T	0.263804	-0.0424995	0.0396683	0.284003	-0.20458	0.0358493	1.15213e-08	0.20774	0.197289	0.292353	0.971321	9	-0.178946	0.594426	1.23089	0.836151	1.81199	1.231(0.836,1.812)	0.910824
	cg09265876	12	KRAS	25537944	rs7952763	12	25551695	T	C	0.0613497	0.0752083	0.0711541	0.290521	0.702996	0.0593319	2.18994e-32	0.106983	0.101617	0.292434	0.383271	13	-0.0921863	0.306152	1.11292	0.911935	1.35819	1.113(0.912,1.358)	0.910824
	cg27176614	16	CYBA	88717989	rs13306296	16	88717957	A	G	0.342536	0.0416622	0.0396825	0.293769	0.915008	0.0300205	4.88085e-204	0.0455321	0.0433942	0.294055	0.982748	20	-0.0395205	0.130585	1.04658	0.96125	1.13949	1.047(0.961,1.139)	0.910824
	cg25042710	7	FAM20C	175423	rs4618643	7	169179	G	A	0.298569	-0.0423981	0.0397581	0.286242	-0.205451	0.0353639	6.26103e-09	0.206366	0.196749	0.294234	0.594256	4	-0.179262	0.591994	1.2292	0.835887	1.80759	1.229(0.836,1.808)	0.910824
	cg05566961	3	RPN1	128398685	rs4481172	3	128372657	C	A	0.368098	-0.0384597	0.036548	0.292659	-0.342987	0.0318478	4.7932e-27	0.112132	0.107066	0.294953	0.684976	20	-0.0977174	0.321981	1.11866	0.906905	1.37986	1.119(0.907,1.38)	0.910824
	cg16382077	7	FAM20C	171543	rs4618643	7	169179	G	A	0.298569	-0.0423981	0.0397581	0.286242	0.188792	0.0340623	2.98086e-08	-0.224576	0.214455	0.29501			-0.644908	0.195756	0.798855	0.524711	1.21623	0.799(0.525,1.216)	0.910824
	cg13014531	12	GABARAPL1	10366500	rs1841957	12	10562025	C	T	0.337423	-0.0385804	0.0365196	0.290771	-0.269444	0.0341447	2.99215e-15	0.143185	0.136746	0.295058	0.153896	20	-0.124837	0.411207	1.15394	0.882641	1.50864	1.154(0.883,1.509)	0.910824
	cg12447832	2	TRAPPC12	3383257	rs62120468	2	3383362	G	A	0.201431	-0.0459589	0.0438894	0.295029	-1.21078	0.0315826	0	0.0379581	0.0362624	0.295209	0.585395	20	-0.0331162	0.109032	1.03869	0.967426	1.1152	1.039(0.967,1.115)	0.910824
	cg08913410	7	CRHR2	30726859	rs7794226	7	30726923	G	C	0.175869	-0.0560052	0.0526049	0.28704	-0.247932	0.0432705	1.00539e-08	0.225889	0.215806	0.295227	0.606262	4	-0.197091	0.648869	1.25344	0.821116	1.91338	1.253(0.821,1.913)	0.910824
	cg26393630	14	PRKD1	30399576	rs6571329	14	30402762	G	T	0.381391	0.0372859	0.0353776	0.29191	0.28721	0.0332493	5.71728e-18	0.129821	0.12409	0.295477	0.330707	12	-0.113395	0.373037	1.13862	0.892798	1.45214	1.139(0.893,1.452)	0.910824
	cg01472464	2	TRAPPC12	3383078	rs62120468	2	3383362	G	A	0.201431	-0.0459589	0.0438894	0.295029	-0.833022	0.0371345	1.8946e-111	0.0551713	0.0527443	0.295554	0.722831	20	-0.0482075	0.15855	1.05672	0.952936	1.17181	1.057(0.953,1.172)	0.910824
	cg20917241	13	COL4A1	110852526	rs1981316	13	110851808	A	C	0.46728	0.038138	0.0361153	0.290965	-0.241004	0.0320335	5.33311e-14	-0.158246	0.151322	0.295674	0.748433	13	-0.454837	0.138345	0.85364	0.634551	1.14837	0.854(0.635,1.148)	0.910824
	cg11566244	11	GSTP1	67351786	rs4930436	11	67329337	A	G	0.417178	-0.0367647	0.0351236	0.295228	0.649554	0.0304846	9.64911e-101	-0.0565998	0.0541386	0.29581	0.239468	20	-0.162711	0.0495119	0.944972	0.849836	1.05076	0.945(0.85,1.051)	0.910824
	cg17916418	3	RPN1	128368141	rs6439135	3	128358633	G	A	0.369121	-0.0368317	0.0350398	0.293194	-0.316606	0.0325516	2.3296e-22	0.116333	0.111317	0.295998	0.884364	20	-0.101848	0.334514	1.12337	0.903167	1.39726	1.123(0.903,1.397)	0.910824
	cg03996735	11	H19	2020104	rs2735971	11	2021649	T	C	0.175869	0.050688	0.0483732	0.294705	0.588308	0.0433752	6.61566e-42	0.086159	0.0824692	0.296142	0.431611	20	-0.0754806	0.247799	1.08998	0.927298	1.2812	1.09(0.927,1.281)	0.910824
	cg19314992	11	ACER3	76614479	rs7927658	11	76574326	C	A	0.281186	0.0429862	0.0404218	0.287581	-0.206106	0.036988	2.51484e-08	-0.208564	0.199661	0.296212	0.922503	9	-0.5999	0.182772	0.811749	0.548867	1.20054	0.812(0.549,1.201)	0.910824
	cg18104242	11	H19	2020118	rs2735971	11	2021649	T	C	0.175869	0.050688	0.0483732	0.294705	0.561452	0.0434384	3.24309e-38	0.0902803	0.0864399	0.296287	0.424363	19	-0.0791419	0.259703	1.09448	0.923909	1.29654	1.094(0.924,1.297)	0.910824
	cg21040360	2	TRAPPC12	3383326	rs62120468	2	3383362	G	A	0.201431	-0.0459589	0.0438894	0.295029	-0.530703	0.0381653	5.87419e-44	0.0866001	0.0829346	0.296394	0.888161	20	-0.0759517	0.249152	1.09046	0.926861	1.28294	1.09(0.927,1.283)	0.910824
	cg20234170	11	CAT	34460107	rs10836229	11	34447300	G	A	0.392638	0.0371318	0.0351106	0.290253	-0.21779	0.0331605	5.10813e-11	-0.170494	0.16329	0.296431	0.759308	20	-0.490542	0.149554	0.843248	0.612294	1.16132	0.843(0.612,1.161)	0.910824
	cg16675558	11	H19	2020101	rs2735971	11	2021649	T	C	0.175869	0.050688	0.0483732	0.294705	0.536854	0.0439898	2.95763e-34	0.0944168	0.0904364	0.296479	0.392684	18	-0.0828385	0.271672	1.09902	0.9205	1.31216	1.099(0.92,1.312)	0.910824
	cg24605090	11	H19	2019943	rs2735971	11	2021649	T	C	0.175869	0.050688	0.0483732	0.294705	0.517463	0.0437647	2.94219e-32	0.0979549	0.0938478	0.296594	0.158437	19	-0.0859868	0.281897	1.10291	0.917606	1.32564	1.103(0.918,1.326)	0.910824
	cg06928838	11	GSTP1	67351490	rs4930436	11	67329337	A	G	0.417178	-0.0367647	0.0351236	0.295228	0.400173	0.0310369	4.89983e-38	-0.0918719	0.0880598	0.296814	0.283723	20	-0.264469	0.0807253	0.912222	0.767613	1.08407	0.912(0.768,1.084)	0.910824
	cg04326540	14	PACS2	105747951	rs11626001	14	105762637	A	G	0.319018	0.0426245	0.040449	0.291983	-0.255845	0.0345978	1.4159e-13	-0.166603	0.159697	0.296836	0.687424	6	-0.479609	0.146403	0.846536	0.619025	1.15766	0.847(0.619,1.158)	0.910824
	cg17657820	13	UFM1	38784087	rs12876396	13	38797842	C	T	0.238241	0.0417677	0.0397065	0.292841	0.301531	0.0377085	1.28134e-15	0.138519	0.132817	0.296983	0.85318	18	-0.121802	0.39884	1.14857	0.885323	1.4901	1.149(0.885,1.49)	0.910824
	cg27072683	10	SEC31B	102289885	rs4919470	10	102298920	T	C	0.191207	-0.0434346	0.0415413	0.295757	-0.530686	0.0384029	1.95993e-43	0.0818461	0.0785023	0.297136	0.674751	20	-0.0720184	0.235711	1.08529	0.930514	1.26581	1.085(0.931,1.266)	0.910824
	cg06908474	11	CAT	34460516	rs10836229	11	34447300	G	A	0.392638	0.0371318	0.0351106	0.290253	-0.20419	0.0332526	8.22225e-10	-0.181849	0.174482	0.297308	0.686998	15	-0.523834	0.160136	0.833727	0.592246	1.17367	0.834(0.592,1.174)	0.910824
	cg19790294	16	CYBA	88717755	rs13306296	16	88717957	A	G	0.342536	0.0416622	0.0396825	0.293769	0.280955	0.0340685	1.6275e-16	0.148288	0.142381	0.297651	0.978896	14	-0.130779	0.427355	1.15985	0.877412	1.5332	1.16(0.877,1.533)	0.910824
	cg17985533	11	H19	2019116	rs2735971	11	2021649	T	C	0.175869	0.050688	0.0483732	0.294705	-0.398285	0.0432637	3.3857e-20	-0.127266	0.122238	0.297814	0.150887	19	-0.366852	0.11232	0.880499	0.692912	1.11887	0.88(0.693,1.119)	0.910824
	cg02376097	19	DMPK	46275166	rs60356458	19	46234632	C	T	0.458078	0.0368808	0.0353306	0.296542	0.437421	0.0309394	2.21553e-45	0.0843142	0.08099	0.297855	0.988034	20	-0.0744262	0.243055	1.08797	0.928276	1.27514	1.088(0.928,1.275)	0.910824
	cg20624886	19	DMPK	46275613	rs2341096	19	46261762	G	A	0.46728	0.0362465	0.034477	0.293109	0.232206	0.031704	2.4035e-13	0.156096	0.149998	0.298034	0.982663	9	-0.1379	0.450092	1.16894	0.871186	1.56846	1.169(0.871,1.568)	0.910824
	cg22183016	5	CD74	149784443	rs11750343	5	149707778	G	A	0.100204	0.0667192	0.0629774	0.289411	-0.294842	0.0533164	3.20161e-08	-0.226288	0.217481	0.298111	0.0797046	4	-0.652551	0.199975	0.797488	0.520716	1.22137	0.797(0.521,1.221)	0.910824
	cg08575537	7	EPO	100318626	rs1734909	7	100309582	C	G	0.406953	0.0376144	0.0359029	0.294791	-0.275658	0.0329862	6.4454e-17	-0.136453	0.131264	0.298558	0.503784	20	-0.39373	0.120824	0.872447	0.674536	1.12843	0.872(0.675,1.128)	0.910824
	cg01591025	7	OSBPL3	25018595	rs181	7	25033620	G	A	0.297546	0.0389371	0.0372734	0.296191	0.365671	0.0353276	4.14779e-25	0.106481	0.102449	0.298639	0.33768	20	-0.094319	0.307281	1.11236	0.909992	1.35972	1.112(0.91,1.36)	0.910824
	cg00688620	4	WFS1	6246051	rs7686248	4	6245915	T	A	0.46319	-0.0382899	0.0362986	0.29149	0.19414	0.032083	1.43782e-09	-0.197228	0.189791	0.298717	0.226823	7	-0.569218	0.174762	0.821003	0.565968	1.19096	0.821(0.566,1.191)	0.910824
	cg18041960	11	GRAMD1B	123415568	rs743633	11	123410974	A	G	0.328221	-0.0392652	0.0371004	0.289896	-0.185786	0.0340641	4.92438e-08	0.211347	0.203419	0.298819	0.913583	6	-0.187354	0.610048	1.23534	0.82915	1.84052	1.235(0.829,1.841)	0.910824
	cg16714091	9	ADAMTSL1	18473902	rs1281350	9	18473576	G	C	0.440695	0.0369412	0.0351738	0.293605	-0.234746	0.0335842	2.7534e-12	-0.157367	0.15152	0.298996	0.465134	18	-0.454346	0.139612	0.85439	0.634863	1.14983	0.854(0.635,1.15)	0.910824
	cg08996506	16	ABCC1	16070868	rs182482	16	16071020	G	A	0.299591	0.0392478	0.0377332	0.298275	-0.57731	0.0356463	5.42355e-59	-0.067984	0.0654951	0.29927	0.56851	20	-0.196354	0.0603864	0.934275	0.821721	1.06225	0.934(0.822,1.062)	0.910824
	cg23889338	19	DNAJB1	14628461	rs35698604	19	14619821	A	G	0.0674847	0.0859805	0.0819373	0.294019	0.470413	0.0670088	2.21598e-12	0.182777	0.176117	0.299356			-0.162412	0.527966	1.20055	0.850091	1.69548	1.201(0.85,1.695)	0.910824
	cg22796265	7	OSBPL3	24963055	rs135	7	24950897	C	T	0.312883	0.0398779	0.0382292	0.296889	-0.348022	0.0341177	1.96975e-24	-0.114585	0.11042	0.299402	0.730489	20	-0.331008	0.101838	0.891736	0.718199	1.1072	0.892(0.718,1.107)	0.910824
	cg18362496	11	H19	2019930	rs2735971	11	2021649	T	C	0.175869	0.050688	0.0483732	0.294705	0.334876	0.0449137	8.91988e-14	0.151364	0.14587	0.29943	0.210677	7	-0.134541	0.437269	1.16342	0.874117	1.54847	1.163(0.874,1.548)	0.910824
	cg11351987	19	MIR7-3HG	4769047	rs8100888	19	4758513	C	T	0.378323	0.038523	0.036709	0.293986	0.230274	0.0337271	8.63684e-12	0.167292	0.161286	0.299626	0.58681	8	-0.148829	0.483413	1.1821	0.861717	1.6216	1.182(0.862,1.622)	0.910824
	cg11231349	1	NOS1AP	162050656	rs1415257	1	162062044	C	T	0.364008	0.0374029	0.035872	0.297098	0.319611	0.0339117	4.30895e-21	0.117026	0.112921	0.300037	0.965463	20	-0.104299	0.338351	1.12415	0.900956	1.40263	1.124(0.901,1.403)	0.910824
	cg15005677	11	MAPK8IP1	45918197	rs7121775	11	45864323	C	T	0.226994	-0.0423387	0.0408062	0.299477	0.726683	0.036766	5.94728e-87	-0.0582629	0.0562314	0.300142	0.080103	20	-0.168476	0.0519506	0.943402	0.844951	1.05332	0.943(0.845,1.053)	0.910824
	cg16874494	7	FAM20C	210873	rs112426303	7	182774	T	C	0.0695297	-0.0783873	0.0747594	0.294395	0.456894	0.0693586	4.4753e-11	-0.171566	0.165685	0.300439	0.959268	3	-0.496309	0.153177	0.842345	0.608774	1.16553	0.842(0.609,1.166)	0.910824
	cg07926758	7	FAM20C	192015	rs112426303	7	182774	T	C	0.0695297	-0.0783873	0.0747594	0.294395	-0.423963	0.0679088	4.28928e-10	0.184892	0.178804	0.301115	0.966713	7	-0.165564	0.535348	1.20309	0.847416	1.70804	1.203(0.847,1.708)	0.910824
	cg25941151	11	TYR	88910913	rs34202080	11	88916646	A	G	0.121677	0.0555452	0.053571	0.299805	-0.605793	0.0510418	1.72412e-32	-0.0916901	0.088768	0.301642	0.544628	20	-0.265675	0.0822952	0.912388	0.766688	1.08578	0.912(0.767,1.086)	0.910824
	cg01631333	13	COL4A1	110747452	rs4773122	13	110747499	A	G	0.245399	-0.0426494	0.0412004	0.30059	-0.553062	0.0364729	6.15489e-52	0.077115	0.0746684	0.301714	0.519223	20	-0.0692351	0.223465	1.08017	0.933107	1.2504	1.08(0.933,1.25)	0.910824
	cg27516404	7	SHH	155640019	rs1225381	7	155641708	T	C	0.354806	-0.0373047	0.0360718	0.301053	0.551345	0.0319048	6.54942e-67	-0.0676612	0.0655422	0.301917	0.976447	20	-0.196124	0.0608015	0.934577	0.82191	1.06269	0.935(0.822,1.063)	0.910824
	cg01192746	5	MAPK9	179717478	rs35703820	5	179717446	T	C	0.158487	-0.0505811	0.0488314	0.300282	0.524639	0.0428378	1.7408e-34	-0.0964112	0.0934086	0.302004	0.21873	19	-0.279492	0.0866697	0.908091	0.756168	1.09054	0.908(0.756,1.091)	0.910824
	cg13454199	7	LEP	127914981	rs4731435	7	127912044	C	T	0.440695	-0.0387934	0.037365	0.299164	-0.308824	0.0328046	4.77459e-21	0.125616	0.121725	0.302086	0.0477455	14	-0.112965	0.364197	1.13385	0.893182	1.43936	1.134(0.893,1.439)	0.910824
	cg06154633	17	RPTOR	78860605	rs2248843	17	78854487	A	G	0.47546	-0.0363642	0.0352454	0.302192	0.478716	0.0314649	2.844e-52	-0.0759619	0.0737939	0.303302	0.683109	20	-0.220598	0.0686741	0.926852	0.802039	1.07109	0.927(0.802,1.071)	0.910824
	cg14184729	14	AKT1	105238773	rs4983384	14	105208057	T	C	0.327198	-0.039192	0.0379272	0.301441	0.371738	0.033471	1.1696e-28	-0.105429	0.102467	0.303525	0.987614	20	-0.306264	0.0954063	0.899938	0.736192	1.10011	0.9(0.736,1.1)	0.910824
	cg25741609	1	MAPKAPK2	206898306	rs7547594	1	206900229	G	C	0.211656	-0.0449129	0.0436456	0.303462	0.989987	0.0373269	5.39309e-155	-0.0453672	0.0441202	0.303826	0.216474	20	-0.131843	0.0411084	0.955647	0.876479	1.04197	0.956(0.876,1.042)	0.910824
	cg05656497	13	COL4A1	110809038	rs631428	13	110808681	C	T	0.139059	0.0553771	0.0532058	0.297964	-0.293763	0.0455526	1.12685e-10	-0.188509	0.183462	0.304179	0.336494	5	-0.548095	0.171077	0.828193	0.57805	1.18658	0.828(0.578,1.187)	0.910824
	cg23163513	11	BRSK2	1481925	rs12577343	11	1477008	T	C	0.387526	-0.0393799	0.0380964	0.30128	-0.27904	0.03291	2.27359e-17	0.141126	0.137537	0.304847	0.8934	20	-0.128447	0.410699	1.15157	0.879461	1.50787	1.152(0.879,1.508)	0.910824
	cg10453419	15	PCSK6	101991560	rs11639051	15	101992998	A	C	0.303681	-0.0388607	0.037721	0.30291	-0.376469	0.0347157	2.1217e-27	0.103224	0.100648	0.305083	0.0647946	19	-0.0940461	0.300494	1.10874	0.910241	1.35053	1.109(0.91,1.351)	0.910824
	cg26209990	7	LEP	127911258	rs7811892	7	127923778	T	C	0.451943	-0.035827	0.0349387	0.305163	-0.996498	0.0251931	0	0.0359529	0.0350732	0.305325	0.0412441	20	-0.0327906	0.104696	1.03661	0.967741	1.11037	1.037(0.968,1.11)	0.910824
	cg21885361	7	LEP	127911034	rs7811892	7	127923778	T	C	0.451943	-0.035827	0.0349387	0.305163	-0.884445	0.0270959	1.06534e-233	0.0405078	0.039523	0.305401	0.0380372	20	-0.0369573	0.117973	1.04134	0.963717	1.12521	1.041(0.964,1.125)	0.910824
	cg08234689	7	LEP	127910927	rs7811892	7	127923778	T	C	0.451943	-0.035827	0.0349387	0.305163	-0.875746	0.0273971	3.35251e-224	0.0409102	0.0399164	0.305412	0.0433307	20	-0.0373259	0.119146	1.04176	0.963362	1.12653	1.042(0.963,1.127)	0.910824
	cg07617283	7	LEP	127913660	rs7811892	7	127923778	T	C	0.451943	-0.035827	0.0349387	0.305163	-0.810703	0.0286635	5.52102e-176	0.0441925	0.0431251	0.30548	0.0356344	20	-0.0403327	0.128718	1.04518	0.96047	1.13737	1.045(0.96,1.137)	0.910824
	cg17821453	1	OMA1	59008471	rs12133823	1	58982005	G	A	0.185072	0.0476367	0.0465224	0.305858	-1.67408	0.0219054	0	-0.0284554	0.0277923	0.305902	0.350504	20	-0.0829283	0.0260175	0.971946	0.920417	1.02636	0.972(0.92,1.026)	0.910824
	cg05332270	2	EIF2AK2	37384401	rs2270414	2	37375932	A	G	0.492843	-0.0366722	0.0356087	0.303072	-0.294305	0.0323399	9.00324e-20	0.124606	0.121765	0.306149	0.87338	20	-0.114053	0.363265	1.1327	0.89221	1.43802	1.133(0.892,1.438)	0.910824
	cg11342234	11	KCNQ1OT1	2710838	rs462402	11	2717293	T	C	0.47546	0.0362156	0.0349256	0.299766	-0.20079	0.0320821	3.88393e-10	-0.180365	0.176312	0.306313	0.890292	16	-0.525937	0.165207	0.834965	0.591002	1.17964	0.835(0.591,1.18)	0.910824
	cg26219069	14	CALM3	90845668	rs5871	14	90871478	C	T	0.0817996	0.0637971	0.0619697	0.30325	-0.428212	0.0562497	2.68419e-14	-0.148985	0.146035	0.307633			-0.435214	0.137244	0.861582	0.647126	1.14711	0.862(0.647,1.147)	0.910824
	cg18676967	2	ALPP	233217476	rs938866	2	233214734	G	A	0.279141	-0.0402563	0.0390298	0.302342	0.257558	0.0373162	5.12626e-12	-0.1563	0.15322	0.307682	0.819382	9	-0.456611	0.144011	0.855303	0.633427	1.1549	0.855(0.633,1.155)	0.910824
	cg07267600	12	CACNA1C	2750053	rs2238096	12	2749913	C	A	0.0695297	0.0747053	0.0725063	0.302856	-0.489524	0.0677745	5.09154e-13	-0.152608	0.149615	0.307727	0.888088	19	-0.445853	0.140637	0.858466	0.640278	1.15101	0.858(0.64,1.151)	0.910824
	cg25171685	15	TPM1	63334355	rs3809565	15	63333619	A	G	0.319018	-0.0373228	0.0365028	0.306561	0.466315	0.0353224	8.57981e-40	-0.0800377	0.0785136	0.308008	0.140583	20	-0.233924	0.073849	0.923082	0.791422	1.07664	0.923(0.791,1.077)	0.910824
	cg17180011	17	RPTOR	78869278	rs2280145	17	78875620	G	A	0.216769	-0.0449751	0.0440678	0.307449	0.583068	0.038086	6.63452e-53	-0.0771353	0.0757469	0.308521	0.87652	20	-0.225599	0.0713286	0.925765	0.798038	1.07393	0.926(0.798,1.074)	0.910824
	cg12089656	2	NCK2	106362717	rs12712216	2	106372671	A	G	0.099182	0.0469562	0.0461023	0.30843	1.46175	0.0402182	3.09662e-289	0.0321233	0.0315515	0.30862	0.49077	20	-0.0297176	0.0939642	1.03264	0.97072	1.09852	1.033(0.971,1.099)	0.910824
	cg10454121	7	KCNH2	150675859	rs4496877	7	150680506	T	G	0.419223	-0.0363976	0.035654	0.307323	-0.419518	0.0317186	6.18969e-40	0.0867605	0.0852409	0.30876	0.789332	20	-0.0803117	0.253833	1.09064	0.922829	1.28896	1.091(0.923,1.289)	0.910824
	cg21152488	11	MUC5AC	1220954	rs10794291	11	1094690	T	C	0.511247	-0.0356586	0.0345073	0.301433	-0.188657	0.0333868	1.5984e-08	0.189013	0.185944	0.309388			-0.175437	0.553463	1.20806	0.83909	1.73927	1.208(0.839,1.739)	0.910824
	cg06787422	15	TPM1	63331851	rs3809565	15	63333619	A	G	0.319018	-0.0373228	0.0365028	0.306561	-0.330372	0.0361616	6.48075e-20	0.112972	0.11118	0.309572	0.335176	20	-0.104941	0.330885	1.1196	0.900378	1.3922	1.12(0.9,1.392)	0.910824
	cg08495860	11	MUC5AC	1220171	rs10902089	11	1094357	A	G	0.506135	-0.0352884	0.0346882	0.309009	0.534242	0.0311772	8.04404e-66	-0.0660532	0.065044	0.30986	0.357094	19	-0.193539	0.061433	0.936081	0.824037	1.06336	0.936(0.824,1.063)	0.910824
	cg19114050	15	BCL2L10	52405026	rs4776019	15	52501213	T	C	0.0582822	0.0810626	0.0791864	0.30598	0.600228	0.075186	1.42535e-15	0.135053	0.133007	0.309925	0.164078	12	-0.125641	0.395747	1.1446	0.881932	1.48549	1.145(0.882,1.485)	0.910824
	cg18240062	17	NPLOC4	79603768	rs7406360	17	79591545	A	G	0.453988	0.035194	0.0344772	0.307354	0.297814	0.0301766	5.67076e-23	0.118174	0.116385	0.309928	0.958117	20	-0.109941	0.346289	1.12544	0.895887	1.41381	1.125(0.896,1.414)	0.910824
	cg19454317	20	PRNP	4573571	rs6133147	20	4579758	A	G	0.210634	-0.046081	0.0451203	0.307116	0.389729	0.0423489	3.48684e-20	-0.118239	0.116484	0.310077	0.515724	20	-0.346548	0.11007	0.888484	0.707125	1.11636	0.888(0.707,1.116)	0.910824
	cg25169784	13	UGGT2	96706045	rs634236	13	96721638	G	A	0.151329	-0.047371	0.0462595	0.305823	0.333666	0.045372	1.92345e-13	-0.141971	0.139978	0.310468	0.0713325	20	-0.416328	0.132386	0.867646	0.659464	1.14155	0.868(0.659,1.142)	0.910824
	cg22814622	11	SLN	107621204	rs57495756	11	107621235	G	C	0.226994	0.0440207	0.0430766	0.30682	0.316181	0.0389269	4.5691e-16	0.139226	0.137314	0.310619	0.617341	9	-0.129909	0.408361	1.14938	0.878175	1.50435	1.149(0.878,1.504)	0.910824
	cg20393620	6	SGK1	134609828	rs9373088	6	134609981	A	T	0.178937	-0.0441338	0.0432951	0.308027	-0.362224	0.0390177	1.6386e-20	0.121841	0.120244	0.310926	0.0840899	20	-0.113837	0.357519	1.12957	0.892403	1.42978	1.13(0.892,1.43)	0.910824
	cg08331398	6	TAP2	32808918	rs3763366	6	32807446	G	C	0.49591	-0.034955	0.0343262	0.308526	-0.317208	0.0320398	4.14438e-23	0.110196	0.108784	0.311072	0.112051	20	-0.103021	0.323413	1.1165	0.902108	1.38184	1.116(0.902,1.382)	0.910824
	cg22091236	17	RPTOR	78853966	rs7217623	17	78873014	A	G	0.184049	-0.0478888	0.0465697	0.303797	0.230933	0.0398451	6.80113e-09	-0.207371	0.204808	0.311293	0.929165	13	-0.608795	0.194053	0.812718	0.544006	1.21416	0.813(0.544,1.214)	0.910824
	cg00570635	2	RAB1A	65355269	rs12713532	2	65356552	G	C	0.311861	0.037216	0.036756	0.311292	1.36963	0.0187812	0	0.0271723	0.026839	0.311339	0.925555	20	-0.0254321	0.0797767	1.02754	0.974889	1.08305	1.028(0.975,1.083)	0.910824
	cg26024566	14	CGRRF1	54977199	rs58230752	14	55003629	C	G	0.091002	-0.0629903	0.0612203	0.303521	-0.305163	0.055791	4.50667e-08	0.206415	0.204134	0.311931	0.81128	4	-0.193688	0.606518	1.22926	0.823915	1.83403	1.229(0.824,1.834)	0.910824
	cg24206507	11	BRSK2	1483099	rs10835060	11	1488143	T	G	0.202454	-0.0451985	0.0445178	0.309968	-0.435204	0.040465	5.6092e-27	0.103856	0.102747	0.312114	0.280852	20	-0.0975281	0.30524	1.10944	0.907077	1.35695	1.109(0.907,1.357)	0.910824
	cg00857968	6	TAP2	32806547	rs3763366	6	32807446	G	C	0.49591	-0.034955	0.0343262	0.308526	-0.262262	0.0320879	3.00237e-16	0.133283	0.131897	0.312252	0.0973209	16	-0.125235	0.391801	1.14257	0.882289	1.47964	1.143(0.882,1.48)	0.910824
	cg15030378	17	SREBF1	17726965	rs12938501	17	17737258	A	C	0.41411	0.0353061	0.0348661	0.311242	-0.476248	0.0322044	1.74293e-49	-0.0741339	0.0733815	0.312373	0.991276	20	-0.217962	0.0696938	0.928547	0.804156	1.07218	0.929(0.804,1.072)	0.910824
	cg21646366	19	RYR1	39010023	rs111335424	19	39014907	C	G	0.0746421	0.0710403	0.0703131	0.312332	-2.91351	0.0409079	0	-0.024383	0.0241359	0.312381	0.817234	20	-0.0716894	0.0229234	0.975912	0.93082	1.02319	0.976(0.931,1.023)	0.910824
	cg03209130	11	SLN	107621307	rs57495756	11	107621235	G	C	0.226994	0.0440207	0.0430766	0.30682	-0.260729	0.0389344	2.13291e-11	-0.168837	0.167129	0.312389	0.566981	4	-0.49641	0.158736	0.844647	0.608712	1.17203	0.845(0.609,1.172)	0.910824
	cg21932452	7	NOS3	150702471	rs2070744	7	150690079	C	T	0.432515	-0.0379824	0.0370212	0.304909	0.186144	0.0328642	1.47847e-08	-0.204048	0.202121	0.312718	0.374465	7	-0.600205	0.192109	0.815423	0.548699	1.2118	0.815(0.549,1.212)	0.910824
	cg20840426	12	NOS1	117800609	rs56202923	12	117793750	T	G	0.212679	0.0446848	0.0441444	0.311422	-0.489689	0.0377648	1.88752e-38	-0.0912514	0.0904221	0.312892	0.134181	20	-0.268479	0.0859759	0.912788	0.764542	1.08978	0.913(0.765,1.09)	0.910824
	cg18505752	6	TAP2	32808752	rs3763366	6	32807446	G	C	0.49591	-0.034955	0.0343262	0.308526	-0.236904	0.0316349	6.95691e-14	0.147549	0.146228	0.312958	0.124203	18	-0.139058	0.434156	1.15899	0.870178	1.54366	1.159(0.87,1.544)	0.910824
	cg04461143	3	STT3B	31494586	rs9824199	3	31494993	T	C	0.282209	0.0394809	0.0391777	0.31358	-1.47558	0.0178895	0	-0.0267562	0.0265527	0.313616	0.798207	20	-0.0787995	0.0252871	0.973599	0.924225	1.02561	0.974(0.924,1.026)	0.910824
	cg14377687	11	MUC5AC	1220228	rs10902089	11	1094357	A	G	0.506135	-0.0352884	0.0346882	0.309009	0.242516	0.0331713	2.65108e-13	-0.145509	0.144413	0.313649	0.672055	5	-0.428558	0.13754	0.864582	0.651447	1.14745	0.865(0.651,1.147)	0.910824
	cg14065526	9	NOTCH1	139406352	rs3124599	9	139403770	A	G	0.0869121	-0.0901243	0.089232	0.312495	-1.11347	0.0778659	2.19328e-46	0.08094	0.0803383	0.313699			-0.0765231	0.238403	1.08431	0.926332	1.26922	1.084(0.926,1.269)	0.910824
	cg08039322	17	NPLOC4	79604097	rs113723749	17	79529322	C	T	0.188139	-0.0630153	0.0624067	0.312614	0.60481	0.0452163	8.36017e-41	-0.10419	0.103478	0.313989	0.326012	20	-0.307007	0.0986269	0.901054	0.735646	1.10365	0.901(0.736,1.104)	0.910824
	cg00000658	9	MAN1B1	139997924	rs4880091	9	140002989	T	C	0.245399	-0.0418462	0.0415031	0.313325	-0.634357	0.0349543	1.32772e-73	0.0659664	0.0655263	0.314071	0.943124	20	-0.0624651	0.194398	1.06819	0.939446	1.21458	1.068(0.939,1.215)	0.910824
	cg12474444	5	TERT	1298644	rs10462706	5	1343794	T	C	0.153374	-0.0506644	0.0502714	0.313542	-0.876138	0.0415003	6.2225e-99	0.057827	0.0574437	0.314092	0.249217	20	-0.0547627	0.170417	1.05953	0.94671	1.1858	1.06(0.947,1.186)	0.910824
	cg00945507	7	SEC61G	54827677	rs35729349	7	54839832	G	T	0.254601	0.043203	0.0426215	0.310752	-0.346919	0.0417501	9.61779e-17	-0.124533	0.123768	0.314326	0.745174	20	-0.367118	0.118052	0.882909	0.692728	1.1253	0.883(0.693,1.125)	0.910824
	cg20099806	17	CCDC47	61849988	rs2584597	17	61941284	C	T	0.329243	0.0410409	0.0404468	0.310254	-0.285426	0.0366648	6.98549e-15	-0.143788	0.142905	0.31433	0.166202	20	-0.423882	0.136306	0.866071	0.654501	1.14603	0.866(0.655,1.146)	0.910824
	cg06639733	16	PIEZO1	88858204	rs861400	16	88862343	C	G	0.411043	-0.0370696	0.0367478	0.313092	-0.444039	0.0317753	2.23505e-44	0.0834827	0.0829734	0.31435	0.685834	20	-0.0791452	0.246111	1.08707	0.923906	1.27904	1.087(0.924,1.279)	0.910824
	cg07133434	3	RPN1	128395694	rs2811490	3	128351755	C	T	0.368098	-0.0348833	0.0346806	0.314491	-1.02243	0.0248314	0	0.034118	0.0339299	0.314635	0.586943	20	-0.0323846	0.100621	1.03471	0.968134	1.10586	1.035(0.968,1.106)	0.910824
	cg10794374	12	TRPV4	110278745	rs6606743	12	110279179	G	A	0.493865	0.0351166	0.0348741	0.313957	0.515371	0.0315313	4.7416e-60	0.0681384	0.0677962	0.314874	0.517734	20	-0.0647422	0.201019	1.07051	0.937309	1.22265	1.071(0.937,1.223)	0.910824
	cg01823414	16	MMP2	55504852	rs1005912	16	55504827	T	A	0.53681	0.0353468	0.0350702	0.313509	0.38743	0.0315337	1.07416e-34	0.091234	0.0908241	0.315132	0.459244	20	-0.0867812	0.269249	1.09553	0.916878	1.30898	1.096(0.917,1.309)	0.910824
	cg20089744	3	RPN1	128372087	rs2811490	3	128351755	C	T	0.368098	-0.0348833	0.0346806	0.314491	-0.582087	0.0317602	4.98706e-75	0.0599279	0.0596694	0.315218	0.532555	20	-0.0570241	0.17688	1.06176	0.944571	1.19349	1.062(0.945,1.193)	0.910824
	cg14225168	9	NOTCH1	139403827	rs3124599	9	139403770	A	G	0.0869121	-0.0901243	0.089232	0.312495	0.623999	0.0772181	6.42398e-16	-0.14443	0.144113	0.316246			-0.426891	0.138031	0.865515	0.652534	1.14801	0.866(0.653,1.148)	0.910824
	cg07786220	17	RPTOR	78683082	rs62068297	17	78567775	T	C	0.179959	-0.0451632	0.0447861	0.313253	0.346281	0.0403129	8.70946e-18	-0.130424	0.130223	0.316565	0.95719	20	-0.385661	0.124813	0.877723	0.680001	1.13294	0.878(0.68,1.133)	0.910824
	cg11429997	2	EIF2AK2	37384286	rs10187017	2	37386731	C	T	0.489775	-0.0349612	0.0346791	0.313389	0.272848	0.0315572	5.32681e-18	-0.128134	0.127961	0.316657	0.768553	20	-0.378938	0.12267	0.879735	0.684588	1.13051	0.88(0.685,1.131)	0.910824
	cg04473763	6	CNR1	88879765	rs754387	6	88878859	A	C	0.324131	-0.0378883	0.0375099	0.312454	-0.262567	0.0344362	2.44509e-14	0.144299	0.144107	0.316663	0.090666	11	-0.138151	0.426749	1.15523	0.870967	1.53227	1.155(0.871,1.532)	0.910824
	cg07969781	6	TAPBP	33282628	rs1061783	6	33282628	T	C	0.511247	0.0342991	0.0343115	0.317485	-0.927155	0.0263885	1.98304e-270	-0.036994	0.0370223	0.317681	0.548771	20	-0.109558	0.0355697	0.963682	0.89623	1.03621	0.964(0.896,1.036)	0.910824
	cg15665090	6	HSPA1L	31778371	rs2227956	6	31778272	G	A	0.155419	-0.0473354	0.0468417	0.312236	0.267455	0.0400837	2.51633e-11	-0.176985	0.177136	0.317723	0.651996	12	-0.524172	0.170202	0.837792	0.592046	1.18554	0.838(0.592,1.186)	0.910824
	cg12406822	1	EPHX1	226033550	rs12405730	1	226042596	G	T	0.0725971	-0.0737552	0.0727323	0.310552	-0.372535	0.0644095	7.3008e-09	0.197982	0.198214	0.317878			-0.190517	0.586481	1.21894	0.826531	1.79765	1.219(0.827,1.798)	0.910824
	cg08573355	6	TAPBP	33282624	rs1061783	6	33282628	T	C	0.511247	0.0342991	0.0343115	0.317485	-0.686947	0.0290769	2.1228e-123	-0.0499298	0.0499925	0.317918	0.54985	20	-0.147915	0.0480555	0.951296	0.862504	1.04923	0.951(0.863,1.049)	0.910824
	cg07895437	6	TAPBP	33282971	rs1061783	6	33282628	T	C	0.511247	0.0342991	0.0343115	0.317485	0.623819	0.0303623	8.38904e-94	0.0549825	0.0550674	0.318057	0.568736	20	-0.0529496	0.162915	1.05652	0.948428	1.17694	1.057(0.948,1.177)	0.910824
	cg05210804	6	TAPBP	33282896	rs1061783	6	33282628	T	C	0.511247	0.0342991	0.0343115	0.317485	0.618998	0.0303848	2.96485e-92	0.0554107	0.0554974	0.318067	0.578585	20	-0.0533642	0.164186	1.05697	0.948035	1.17843	1.057(0.948,1.178)	0.910824
	cg14288848	6	TAPBP	33282873	rs1061783	6	33282628	T	C	0.511247	0.0342991	0.0343115	0.317485	0.618636	0.0304889	1.55978e-91	0.0554431	0.0555304	0.318072	0.555488	20	-0.0533965	0.164283	1.05701	0.948004	1.17855	1.057(0.948,1.179)	0.910824
	cg10376053	6	TAPBP	33282867	rs1061783	6	33282628	T	C	0.511247	0.0342991	0.0343115	0.317485	0.607164	0.0304651	2.2438e-88	0.0564907	0.0565821	0.318093	0.558663	20	-0.0544102	0.167392	1.05812	0.947044	1.18222	1.058(0.947,1.182)	0.910824
	cg14473643	6	TAPBP	33282885	rs1061783	6	33282628	T	C	0.511247	0.0342991	0.0343115	0.317485	0.534132	0.0310321	2.14929e-66	0.0642147	0.0643461	0.3183	0.554269	20	-0.0619037	0.190333	1.06632	0.939973	1.20965	1.066(0.94,1.21)	0.910824
	cg08771019	6	TAPBP	33283145	rs1061783	6	33282628	T	C	0.511247	0.0342991	0.0343115	0.317485	0.536632	0.0313869	1.55383e-65	0.0639155	0.0640478	0.318311	0.521757	20	-0.0616182	0.189449	1.066	0.940242	1.20858	1.066(0.94,1.209)	0.910824
	cg17055704	6	TAPBP	33282879	rs1061783	6	33282628	T	C	0.511247	0.0342991	0.0343115	0.317485	0.525039	0.0315594	3.78855e-62	0.0653268	0.0654683	0.318357	0.52154	20	-0.0629911	0.193645	1.06751	0.938952	1.21366	1.068(0.939,1.214)	0.910824
	cg11917542	6	TAPBP	33283158	rs1061783	6	33282628	T	C	0.511247	0.0342991	0.0343115	0.317485	0.478872	0.031493	3.24225e-52	0.0716248	0.0718054	0.318529	0.479082	20	-0.0691138	0.212363	1.07425	0.93322	1.2366	1.074(0.933,1.237)	0.910824
	cg04975775	11	H19	2019587	rs2735972	11	2021581	A	G	0.174847	0.0490768	0.0490492	0.317038	-0.518119	0.0432424	4.42914e-33	-0.0947212	0.0949973	0.318719	0.381558	18	-0.280916	0.0914735	0.909627	0.755092	1.09579	0.91(0.755,1.096)	0.910824
	cg05314679	8	PABPC1	101821998	rs3847155	8	101820269	A	G	0.4182	-0.0344917	0.0345451	0.31806	0.594324	0.0316518	1.16634e-78	-0.0580352	0.0582072	0.318743	0.655317	20	-0.172121	0.0560509	0.943617	0.841877	1.05765	0.944(0.842,1.058)	0.910824
	cg27300742	11	H19	2020129	rs2735972	11	2021581	A	G	0.174847	0.0490768	0.0490492	0.317038	0.511926	0.0430268	1.21452e-32	0.095867	0.0961513	0.318743	0.371008	18	-0.0925895	0.284324	1.10061	0.911568	1.32886	1.101(0.912,1.329)	0.910824
	cg25954512	6	TAPBP	33283021	rs1061783	6	33282628	T	C	0.511247	0.0342991	0.0343115	0.317485	0.436221	0.0319359	1.77806e-42	0.0786279	0.0788666	0.318778	0.593865	20	-0.0759506	0.233206	1.0818	0.926862	1.26264	1.082(0.927,1.263)	0.910824
	cg14309283	6	TAPBP	33282890	rs1061783	6	33282628	T	C	0.511247	0.0342991	0.0343115	0.317485	0.417157	0.0318722	3.83443e-39	0.0822212	0.0824904	0.318893	0.47677	20	-0.07946	0.243902	1.0857	0.923615	1.27622	1.086(0.924,1.276)	0.910824
	cg03000593	6	TAPBP	33283162	rs1061783	6	33282628	T	C	0.511247	0.0342991	0.0343115	0.317485	0.409754	0.0319379	1.1181e-37	0.0837066	0.0839906	0.31895	0.422472	16	-0.080915	0.248328	1.08731	0.922272	1.28188	1.087(0.922,1.282)	0.910824
	cg25356697	6	TAPBP	33282736	rs1061783	6	33282628	T	C	0.511247	0.0342991	0.0343115	0.317485	0.373104	0.0320476	2.51444e-31	0.0919291	0.0923007	0.319263	0.36022	15	-0.0889803	0.272838	1.09629	0.914864	1.31369	1.096(0.915,1.314)	0.910824
	cg13027595	6	TAPBP	33283184	rs1061783	6	33282628	T	C	0.511247	0.0342991	0.0343115	0.317485	0.369302	0.0319551	6.8131e-31	0.0928756	0.093256	0.319289	0.644428	18	-0.0899062	0.275657	1.09733	0.914017	1.3174	1.097(0.914,1.317)	0.910824
	cg14096569	6	TAPBP	33283064	rs1061783	6	33282628	T	C	0.511247	0.0342991	0.0343115	0.317485	0.373101	0.0325569	2.09629e-30	0.0919299	0.0923123	0.319319	0.435835	20	-0.0890022	0.272862	1.09629	0.914844	1.31372	1.096(0.915,1.314)	0.910824
	cg26381313	10	SEC31B	102279455	rs4919471	10	102299239	G	A	0.191207	-0.0418751	0.0415906	0.314011	-0.256469	0.0384365	2.51412e-11	0.163276	0.164002	0.319458	0.71935	12	-0.158168	0.48472	1.17736	0.853706	1.62372	1.177(0.854,1.624)	0.910824
	cg09318921	4	QDPR	17490309	rs2597778	4	17508754	C	T	0.287321	-0.0390118	0.0391146	0.318585	-0.540345	0.0337628	1.19534e-57	0.0721979	0.0725287	0.319523	0.720329	20	-0.0699584	0.214354	1.07487	0.932433	1.23906	1.075(0.932,1.239)	0.910824
	cg00610991	2	SLC8A1	40677600	rs4450659	2	40674259	G	C	0.389571	-0.0354994	0.0352673	0.314136	-0.216543	0.0334233	9.24567e-11	0.163937	0.164819	0.319908	0.495397	15	-0.159108	0.486982	1.17814	0.852904	1.6274	1.178(0.853,1.627)	0.910824
	cg22717235	1	MCL1	150554875	rs11204674	1	150569968	C	T	0.0879346	0.053692	0.0539812	0.31991	-2.2633	0.028638	0	-0.0237229	0.0238525	0.319949	0.314586	20	-0.0704738	0.023028	0.976556	0.931952	1.0233	0.977(0.932,1.023)	0.910824
	cg02217815	22	FOXRED2	36890079	rs2281087	22	36889930	G	A	0.222904	0.0417902	0.0416788	0.316018	-0.32599	0.0417929	6.18434e-15	-0.128195	0.128905	0.319984	0.96977	20	-0.380849	0.124459	0.879682	0.683281	1.13254	0.88(0.683,1.133)	0.910824
	cg06750524	19	APOE	45409955	rs769449	19	45410002	A	G	0.124744	-0.0592747	0.0591512	0.316301	0.374295	0.0483123	9.3783e-15	-0.158364	0.15935	0.320315	0.0514402	14	-0.47069	0.153962	0.853539	0.624571	1.16645	0.854(0.625,1.166)	0.910824
	cg15886040	11	H19	2019606	rs2735972	11	2021581	A	G	0.174847	0.0490768	0.0490492	0.317038	-0.369338	0.0435282	2.1565e-17	-0.132878	0.133723	0.320379	0.359728	8	-0.394975	0.129219	0.875572	0.673697	1.13794	0.876(0.674,1.138)	0.910824
	cg25449950	4	SOD3	24797174	rs4351004	4	24676608	A	G	0.295501	0.0401228	0.0402476	0.318814	0.396339	0.0369786	8.37501e-27	0.101234	0.101987	0.320898	0.762477	15	-0.0986605	0.301129	1.10654	0.90605	1.35138	1.107(0.906,1.351)	0.910824
	cg16216407	4	SOD3	24797140	rs4351004	4	24676608	A	G	0.295501	0.0401228	0.0402476	0.318814	0.40276	0.0376454	1.03135e-26	0.0996197	0.100362	0.320905	0.801701	16	-0.0970898	0.296329	1.10475	0.907474	1.34491	1.105(0.907,1.345)	0.910824
	cg21411366	4	SOD3	24797176	rs4351004	4	24676608	A	G	0.295501	0.0401228	0.0402476	0.318814	0.386061	0.0370686	2.12298e-25	0.103929	0.104728	0.32102	0.846852	12	-0.101338	0.309196	1.10952	0.903628	1.36233	1.11(0.904,1.362)	0.910824
	cg11372436	4	SOD3	24797007	rs4351004	4	24676608	A	G	0.295501	0.0401228	0.0402476	0.318814	0.366897	0.0375091	1.35139e-22	0.109357	0.110266	0.321314	0.818555	11	-0.106764	0.325478	1.11556	0.898737	1.38469	1.116(0.899,1.385)	0.910824
	cg15922305	11	H19	2019129	rs2735972	11	2021581	A	G	0.174847	0.0490768	0.0490492	0.317038	-0.329292	0.0441726	9.00907e-14	-0.149037	0.150289	0.321358	0.104728	15	-0.443603	0.145529	0.861537	0.64172	1.15665	0.862(0.642,1.157)	0.910824
	cg10024799	12	CACNA1C	2641381	rs73046278	12	2641608	A	T	0.0511247	0.076845	0.077446	0.32108	-1.84302	0.071005	1.54749e-148	-0.0416952	0.0420519	0.321434	0.507285	20	-0.124117	0.0407265	0.959162	0.883277	1.04157	0.959(0.883,1.042)	0.910824
	cg00034003	16	PIEZO1	88779146	rs80304559	16	88775254	A	G	0.107362	0.0585818	0.0590412	0.321091	1.1474	0.0439554	3.30784e-150	0.0510561	0.0514936	0.32144	0.627951	20	-0.0498714	0.151984	1.05238	0.951352	1.16414	1.052(0.951,1.164)	0.910824
	cg08165487	1	JUN	59211967	rs13376301	1	59213743	A	G	0.320041	-0.0371767	0.0373212	0.319187	0.357429	0.0360045	3.16554e-23	-0.104012	0.10494	0.321611	0.176576	20	-0.309694	0.10167	0.901214	0.733671	1.10702	0.901(0.734,1.107)	0.910824
	cg27368379	6	TAPBP	33283328	rs1061783	6	33282628	T	C	0.511247	0.0342991	0.0343115	0.317485	0.235081	0.0319744	1.95038e-13	0.145903	0.147299	0.321917	0.729973	7	-0.142803	0.434609	1.15708	0.866925	1.54436	1.157(0.867,1.544)	0.910824
	cg09548275	11	NR1H3	47282999	rs10838684	11	47283862	G	A	0.293456	-0.0383316	0.0381045	0.314436	-0.200836	0.0355639	1.63089e-08	0.19086	0.192716	0.321994	0.669335	5	-0.186863	0.568583	1.21029	0.829557	1.76576	1.21(0.83,1.766)	0.910824
	cg08129017	17	SREBF1	17728660	rs9902941	17	17733760	C	T	0.41411	0.0346237	0.0348176	0.320013	0.360268	0.0341098	4.47045e-26	0.0961055	0.0970711	0.322148	0.992655	20	-0.0941539	0.286365	1.10088	0.910143	1.33158	1.101(0.91,1.332)	0.910824
	cg03577139	4	SOD3	24796988	rs4351004	4	24676608	A	G	0.295501	0.0401228	0.0402476	0.318814	0.314809	0.0380243	1.24061e-16	0.127451	0.128771	0.322296	0.882284	7	-0.12494	0.379842	1.13593	0.88255	1.46205	1.136(0.883,1.462)	0.910824
	cg22699500	12	GABARAPL1	10366566	rs1841958	12	10562089	A	C	0.321063	-0.0366919	0.0367483	0.318053	-0.253492	0.0338183	6.59439e-14	0.144746	0.146249	0.322309	0.146462	15	-0.141902	0.431394	1.15575	0.867706	1.5394	1.156(0.868,1.539)	0.910824
	cg01830271	6	HLA-C	31275148	rs2844623	6	31232543	T	C	0.157464	-0.0505944	0.0510287	0.321446	0.579365	0.0409575	1.9908e-45	-0.0873274	0.088293	0.322632	0.0244378	20	-0.260382	0.0857269	0.916377	0.770757	1.08951	0.916(0.771,1.09)	0.910824
	cg20712659	3	SEC13	10360004	rs40608	3	10341836	C	T	0.230061	0.040847	0.0412443	0.321994	0.687875	0.0370314	5.07626e-77	0.0593815	0.0600442	0.322681	0.487225	20	-0.0583051	0.177068	1.06118	0.943362	1.19371	1.061(0.943,1.194)	0.910824
	cg04609694	6	HSP90AB1	44204009	rs34083426	6	44217374	G	T	0.245399	0.0416716	0.0417893	0.318675	0.295552	0.0387608	2.44004e-14	0.140996	0.142598	0.322778	0.262296	12	-0.138496	0.420488	1.15142	0.870667	1.5227	1.151(0.871,1.523)	0.910824
	cg02730678	6	CDKN1A	36641554	rs12199346	6	36641546	A	C	0.208589	0.0397378	0.0401514	0.322321	0.692108	0.0367128	2.83242e-79	0.0574156	0.0580931	0.322987	0.589884	20	-0.0564469	0.171278	1.0591	0.945117	1.18682	1.059(0.945,1.187)	0.910824
	cg08257088	16	TRAP1	3726052	rs117036567	16	3708316	G	C	0.0613497	-0.0657871	0.0663674	0.32156	0.632671	0.0624484	4.02088e-24	-0.103983	0.105401	0.323865	0.950272	20	-0.310569	0.102603	0.901241	0.73303	1.10805	0.901(0.733,1.108)	0.910824
	cg00651216	6	HSP90AB1	44213720	rs504697	6	44220076	T	C	0.274029	-0.0395004	0.0396611	0.319275	-0.245923	0.0350987	2.44163e-12	0.160621	0.162896	0.324115	0.182968	12	-0.158655	0.479897	1.17424	0.853291	1.61591	1.174(0.853,1.616)	0.910824
	cg14004921	9	GRIN1	140023416	rs6420281	9	140004959	C	T	0.247444	-0.0411685	0.0414126	0.320171	-0.279606	0.0365063	1.87204e-14	0.147238	0.149353	0.324213	0.967554	17	-0.145494	0.43997	1.15863	0.864595	1.55266	1.159(0.865,1.553)	0.910824
	cg12226135	12	HSPB8	119563359	rs6490238	12	119567389	C	T	0.264826	-0.0398423	0.0399957	0.319171	0.245488	0.0357743	6.78377e-12	-0.162298	0.164631	0.324216	0.584117	4	-0.484975	0.160379	0.850188	0.615713	1.17396	0.85(0.616,1.174)	0.910824
	cg07103722	6	MICA	31370532	rs59727727	6	31329797	C	T	0.171779	-0.0503272	0.0510007	0.323744	0.93995	0.0478557	6.85412e-86	-0.0535425	0.0543274	0.324353	0.0669558	20	-0.160024	0.0529392	0.947866	0.852123	1.05437	0.948(0.852,1.054)	0.910824
	cg10021122	1	TTF2	117610620	rs2801938	1	117623030	G	C	0.0715746	-0.0565322	0.0573162	0.323975	-1.13809	0.0516359	1.17344e-107	0.0496729	0.0504121	0.324459	0.318516	20	-0.0491348	0.148481	1.05093	0.952053	1.16007	1.051(0.952,1.16)	0.910824
	cg09185587	7	AGR3	16890973	rs11977666	7	16892312	G	C	0.423313	-0.0365499	0.0370202	0.323497	-0.493891	0.0325176	4.21863e-52	0.074004	0.0751144	0.324517	0.348744	20	-0.0732202	0.221228	1.07681	0.929396	1.24761	1.077(0.929,1.248)	0.910824
	cg10792982	14	PACS2	105748885	rs8022526	14	105756485	G	A	0.324131	0.0384137	0.0389454	0.323963	0.680784	0.0330527	2.92507e-94	0.0564256	0.0572722	0.324517	0.729167	7	-0.0558279	0.168679	1.05805	0.945702	1.18374	1.058(0.946,1.184)	0.910824
	cg20185718	6	TAPBP	33283317	rs1061783	6	33282628	T	C	0.511247	0.0342991	0.0343115	0.317485	0.180859	0.032372	2.31164e-08	0.189646	0.192727	0.32511			-0.188099	0.567391	1.20882	0.828533	1.76366	1.209(0.829,1.764)	0.910824
	cg00787305	9	SEC16A	139378815	rs4451431	9	139324680	T	C	0.133947	0.0534583	0.0536755	0.319273	0.282942	0.0451031	3.53629e-10	0.188937	0.192081	0.325296	0.300378	10	-0.187542	0.565416	1.20796	0.828994	1.76018	1.208(0.829,1.76)	0.910824
	cg04678230	6	TAPBP	33283189	rs1061783	6	33282628	T	C	0.511247	0.0342991	0.0343115	0.317485	0.179093	0.0325386	3.71242e-08	0.191516	0.194719	0.325337			-0.190133	0.573165	1.21108	0.826849	1.77387	1.211(0.827,1.774)	0.910824
	cg02775129	4	SEC24D	119771670	rs1365548	4	119779351	A	T	0.122699	0.0532273	0.0541458	0.325589	1.08635	0.0470974	1.01534e-117	0.0489965	0.0498872	0.326028	0.372053	19	-0.0487824	0.146775	1.05022	0.952388	1.15809	1.05(0.952,1.158)	0.910824
	cg00077738	4	FGFR3	1801866	rs405669	4	2025082	G	C	0.261759	0.0436054	0.0440225	0.321917	-0.27755	0.0366948	3.91627e-14	-0.157108	0.159965	0.326031	0.915004	11	-0.470639	0.156423	0.854612	0.624603	1.16932	0.855(0.625,1.169)	0.910824
	cg02856338	8	PABPC1	101822108	rs3843557	8	101817853	A	C	0.417178	-0.0340654	0.0346356	0.325343	0.573423	0.031751	6.58108e-73	-0.0594071	0.060491	0.326059	0.652884	20	-0.177969	0.0591553	0.942323	0.836968	1.06094	0.942(0.837,1.061)	0.910824
	cg01799856	17	STARD3	37794335	rs4794817	17	37794351	T	A	0.199387	-0.0436538	0.0444207	0.325738	-0.992905	0.0390114	6.76478e-143	0.0439657	0.0447715	0.326098	0.492639	20	-0.0437864	0.131718	1.04495	0.957158	1.14079	1.045(0.957,1.141)	0.910824
	cg14364472	9	NOTCH1	139394549	rs4880054	9	139394573	G	T	0.45501	-0.0419203	0.042667	0.325854	0.85345	0.0290187	4.04978e-190	-0.0491186	0.0500214	0.326124	0.487935	20	-0.147161	0.0489233	0.952068	0.863155	1.05014	0.952(0.863,1.05)	0.910824
	cg18790646	6	CYP21A2	32006196	rs77913858	6	32066815	T	C	0.0449898	0.0771813	0.0778362	0.321399	-0.46901	0.068378	6.93082e-12	-0.164562	0.167684	0.326403			-0.493223	0.164099	0.848265	0.610655	1.17833	0.848(0.611,1.178)	0.911003
	cg06955417	7	AGR3	16890879	rs11977666	7	16892312	G	C	0.423313	-0.0365499	0.0370202	0.323497	-0.255476	0.0331153	1.21218e-14	0.143066	0.146088	0.327427	0.163721	13	-0.143266	0.429398	1.15381	0.866523	1.53633	1.154(0.867,1.536)	0.91171
	cg06857263	19	FKRP	47260556	rs3810288	19	47248979	G	C	0.316973	-0.0372552	0.0377082	0.323159	-0.244467	0.0339779	6.25116e-13	0.152394	0.155694	0.327678	0.833414	11	-0.152766	0.457554	1.16462	0.85833	1.5802	1.165(0.858,1.58)	0.91171
	cg17352422	20	TGM2	36793970	rs4811528	20	36787429	G	A	0.249489	0.041696	0.0421961	0.32308	0.267574	0.0377185	1.30312e-12	0.15583	0.159221	0.327729	0.708647	14	-0.156243	0.467903	1.16863	0.855351	1.59664	1.169(0.855,1.597)	0.91171
	cg03027379	6	MICB	31462183	rs3130573	6	31106268	G	A	0.346626	0.035448	0.0358005	0.322098	-0.218229	0.0340729	1.50591e-10	-0.162435	0.165999	0.327812	0.0453385	8	-0.487793	0.162923	0.850071	0.61398	1.17695	0.85(0.614,1.177)	0.91171
	cg21904251	19	DMPK	46279757	rs1865116	19	46294510	A	G	0.46728	0.0334113	0.0341196	0.327462	-0.674399	0.0293578	8.94722e-117	-0.0495423	0.0506386	0.327901	0.932325	20	-0.148794	0.0497094	0.951665	0.861747	1.05097	0.952(0.862,1.051)	0.91171
	cg04191403	16	JPH3	87637999	rs2562060	16	87643605	T	C	0.447853	0.0344755	0.0350533	0.325354	0.302153	0.0319031	2.77268e-21	0.114099	0.116636	0.327948	0.0948926	20	-0.114508	0.342706	1.12086	0.891805	1.40875	1.121(0.892,1.409)	0.91171
	cg00828618	19	TRAPPC5	7754029	rs57720845	19	7753450	G	C	0.0797546	-0.0669604	0.0674715	0.320991	0.339037	0.0600512	1.64418e-08	-0.197502	0.202061	0.328352			-0.593542	0.198538	0.820778	0.552368	1.21962	0.821(0.552,1.22)	0.912233
	cg24032252	14	CDKN3	54864572	rs3886518	14	54862463	C	T	0.488753	-0.033776	0.0343882	0.326003	-0.303112	0.0326126	1.48138e-20	0.111431	0.114082	0.328689	0.942171	20	-0.11217	0.335032	1.11788	0.893893	1.39798	1.118(0.894,1.398)	0.912522
	cg25601886	11	INS	2183420	rs3842755	11	2180796	A	C	0.212679	-0.0436571	0.0444418	0.32593	-0.335477	0.0378749	8.18345e-19	0.130134	0.133286	0.328887	0.625236	20	-0.131107	0.391375	1.13898	0.877124	1.47901	1.139(0.877,1.479)	0.912522
	cg02474032	16	JPH3	87678659	rs66690883	16	87691310	G	A	0.231084	-0.043022	0.0436914	0.324782	-0.239083	0.0375931	2.02064e-10	0.179946	0.184923	0.330511	0.992005	11	-0.182503	0.542395	1.19715	0.833182	1.72012	1.197(0.833,1.72)	0.916427
	cg02538829	17	MAP2K3	21226533	rs62051440	17	22195937	G	A	0.0429448	-0.100588	0.102194	0.324977	-0.325138	0.0553427	4.22873e-09	0.309371	0.318692	0.331671	0.607557	8	-0.315265	0.934007	1.36257	0.729595	2.54469	1.363(0.73,2.545)	0.917077
	cg18504989	19	DMPK	46286198	rs635299	19	46274171	C	A	0.46728	0.0334324	0.0342656	0.32922	0.288272	0.0317134	9.91247e-20	0.115975	0.119548	0.33199	0.998861	16	-0.118339	0.350289	1.12297	0.888395	1.41948	1.123(0.888,1.419)	0.917077
	cg08220120	5	MZB1	138727711	rs10063949	5	138719526	C	T	0.381391	-0.0360457	0.0371354	0.331719	0.643038	0.0268285	5.93843e-127	-0.0560553	0.0577972	0.332115	0.341943	20	-0.169338	0.0572272	0.945487	0.844224	1.0589	0.945(0.844,1.059)	0.917077
	cg01030886	12	MSRB3	65766936	rs66584980	12	65706289	C	T	0.200409	-0.0411894	0.0421667	0.328657	-0.296194	0.0395082	6.52862e-14	0.139062	0.143565	0.332727	0.598852	5	-0.142325	0.420449	1.1492	0.867339	1.52265	1.149(0.867,1.523)	0.917077
	cg00704970	17	RPTOR	78865368	rs7208835	17	78874759	A	G	0.205521	-0.043172	0.0445719	0.332748	1.25434	0.0296238	0	-0.0344181	0.0355434	0.332875	0.917315	20	-0.104083	0.035247	0.966167	0.90115	1.03588	0.966(0.901,1.036)	0.917077
	cg03502601	17	RPTOR	78865373	rs7208835	17	78874759	A	G	0.205521	-0.043172	0.0445719	0.332748	1.1751	0.0316986	8.23052e-301	-0.036739	0.0379433	0.332913	0.912204	20	-0.111108	0.0376299	0.963928	0.894842	1.03835	0.964(0.895,1.038)	0.917077
	cg14240223	9	NOTCH1	139429185	rs10870084	9	139458533	C	T	0.0705521	-0.0696743	0.0712525	0.328148	0.373991	0.0565751	3.82961e-11	-0.186299	0.192592	0.333382	0.740736	3	-0.563779	0.191181	0.830025	0.569054	1.21068	0.83(0.569,1.211)	0.917077
	cg24674445	1	LMNA	156076363	rs915179	1	156078249	G	A	0.381391	0.0340427	0.0352076	0.333589	1.099	0.0240226	0	0.030976	0.0320432	0.333697	0.328602	20	-0.0318287	0.0937807	1.03146	0.968673	1.09832	1.031(0.969,1.098)	0.917077
	cg21533971	17	ATP2A3	3884911	rs7223218	17	3877392	C	T	0.0981595	0.0569502	0.0582301	0.328065	-0.320914	0.051053	3.25961e-10	-0.177462	0.183634	0.333848	0.51856	20	-0.537385	0.182461	0.837393	0.584274	1.20017	0.837(0.584,1.2)	0.917077
	cg18276016	1	LMNA	156076340	rs915179	1	156078249	G	A	0.381391	0.0340427	0.0352076	0.333589	0.677384	0.030629	2.22697e-108	0.0502561	0.0520256	0.33405	0.428775	20	-0.0517141	0.152226	1.05154	0.9496	1.16442	1.052(0.95,1.164)	0.917077
	cg21806273	1	NLRP3	247578953	rs3738447	1	247588960	A	G	0.0613497	-0.0687199	0.0702357	0.327868	0.390156	0.0652297	2.21412e-09	-0.176134	0.182412	0.334252			-0.533662	0.181394	0.838506	0.586454	1.19889	0.839(0.586,1.199)	0.917077
	cg08839020	6	DNAH8	38679582	rs34897279	6	38636717	T	C	0.119632	-0.0529725	0.0544664	0.330765	-0.423989	0.0532483	1.68615e-15	0.124938	0.129416	0.334345	0.820202	9	-0.128717	0.378593	1.13308	0.879222	1.46023	1.133(0.879,1.46)	0.917077
	cg10438121	1	PLOD1	11991667	rs72640281	1	11954877	C	G	0.0736196	-0.0599946	0.0619311	0.332679	-0.625831	0.0584383	9.20942e-27	0.095864	0.0993623	0.334649	0.799238	9	-0.0988861	0.290614	1.10061	0.905846	1.33725	1.101(0.906,1.337)	0.917077
	cg05244766	11	GSTP1	67350499	rs4320958	11	67310334	A	G	0.403885	-0.035521	0.0366833	0.332887	-0.356921	0.0316002	1.3908e-29	0.0995207	0.103154	0.334657	0.318403	20	-0.102661	0.301703	1.10464	0.902433	1.35216	1.105(0.902,1.352)	0.917077
	cg14061069	19	DMPK	46274453	rs4802276	19	46260748	C	T	0.468303	0.033027	0.034234	0.334674	1.2099	0.0182168	0	0.0272973	0.0282979	0.334725	0.933984	20	-0.0281666	0.0827612	1.02767	0.972226	1.08628	1.028(0.972,1.086)	0.917077
	cg26990733	6	MICA	31371465	rs2523605	6	31323409	T	C	0.170757	-0.0470361	0.0484397	0.331537	0.312423	0.0387816	7.88611e-16	-0.150553	0.156167	0.335023	0.448561	20	-0.45664	0.155534	0.860232	0.633408	1.16828	0.86(0.633,1.168)	0.917077
	cg17328514	10	SEC31B	102290094	rs7079756	10	102302105	A	G	0.190184	-0.0405071	0.0418405	0.332979	-0.405072	0.0389437	2.44112e-25	0.0999997	0.103738	0.335064	0.464542	15	-0.103327	0.303326	1.10517	0.901832	1.35436	1.105(0.902,1.354)	0.917077
	cg20908204	19	DMPK	46285434	rs4802276	19	46260748	C	T	0.468303	0.033027	0.034234	0.334674	0.62529	0.0304642	1.27639e-93	0.0528187	0.0548095	0.335207	0.803774	20	-0.0546079	0.160245	1.05424	0.946856	1.1738	1.054(0.947,1.174)	0.917077
	cg17263974	15	PCSK6	102030215	rs7183866	15	102035895	A	G	0.178937	-0.0452743	0.0468435	0.333793	-0.490796	0.0409352	4.02941e-33	0.0922467	0.0957535	0.335358	0.759534	20	-0.0954302	0.279924	1.09664	0.908982	1.32303	1.097(0.909,1.323)	0.917077
	cg11101109	19	DMPK	46274119	rs4802276	19	46260748	C	T	0.468303	0.033027	0.034234	0.334674	0.49705	0.0302109	8.02376e-61	0.0664461	0.0689927	0.335504	0.94602	20	-0.0687796	0.201672	1.0687	0.933532	1.22345	1.069(0.934,1.223)	0.917077
	cg00559992	5	PIK3R1	67581342	rs72757693	5	67581304	A	G	0.127812	0.0533982	0.055171	0.333111	0.422215	0.0448025	4.34571e-21	0.126472	0.131358	0.335647	0.0966192	11	-0.13099	0.383934	1.13482	0.877227	1.46805	1.135(0.877,1.468)	0.917077
	cg23935261	1	TMCO1	165811207	rs6702462	1	165812120	C	A	0.412065	0.0334655	0.0346866	0.334647	-0.454865	0.0328843	1.62784e-43	-0.0735724	0.0764422	0.33582	0.210015	12	-0.223399	0.0762543	0.929069	0.799796	1.07924	0.929(0.8,1.079)	0.917077
	cg23012547	2	TM4SF20	228245511	rs35656365	2	228264803	G	C	0.101227	-0.0590111	0.0604721	0.329144	0.315096	0.0551154	1.08406e-08	-0.18728	0.194692	0.336086	0.676833	10	-0.568876	0.194316	0.829212	0.566161	1.21448	0.829(0.566,1.214)	0.917077
	cg05859264	6	MAPK13	36097692	rs10447396	6	36113598	A	G	0.307771	-0.0371724	0.0384804	0.33404	-0.302239	0.0347993	3.78059e-18	0.12299	0.128103	0.337011	0.924428	14	-0.128092	0.374072	1.13087	0.879773	1.45364	1.131(0.88,1.454)	0.917077
	cg22955899	14	LGALS3	55617843	rs66871576	14	55629050	T	C	0.41002	0.0354849	0.036966	0.337089	-1.07707	0.0251189	0	-0.0329458	0.0343295	0.33721	0.715856	20	-0.100232	0.03434	0.967591	0.904628	1.03494	0.968(0.905,1.035)	0.917077
	cg05012902	17	VAMP2	8065517	rs58356259	17	8040151	T	C	0.44274	-0.0348128	0.0359654	0.333068	-0.238272	0.0333317	8.77283e-13	0.146105	0.15232	0.337458	0.210236	18	-0.152442	0.444652	1.15732	0.858609	1.55995	1.157(0.859,1.56)	0.917077
	cg17949162	10	TIAL1	121355153	rs7087527	10	121311498	G	A	0.195297	0.0388562	0.0400657	0.33214	0.225183	0.036998	1.15512e-09	0.172554	0.180169	0.338199	0.036076	8	-0.180577	0.525685	1.18834	0.834788	1.69162	1.188(0.835,1.692)	0.917077
	cg04002298	3	PRKCD	53230319	rs6772648	3	53244603	C	T	0.220859	-0.0435961	0.0454231	0.337168	0.555254	0.0396988	1.87991e-44	-0.0785155	0.0819984	0.338303	0.808156	20	-0.239232	0.0822014	0.924488	0.787232	1.08567	0.924(0.787,1.086)	0.917077
	cg18273401	14	LGALS3	55600338	rs72718804	14	55630610	A	G	0.41002	0.0355513	0.0370203	0.336894	0.415166	0.0330937	4.22459e-36	0.0856316	0.0894307	0.338305	0.757113	20	-0.0896526	0.260916	1.0894	0.914249	1.29812	1.089(0.914,1.298)	0.917077
	cg25654774	2	LPIN1	11924984	rs3795974	2	11924950	T	C	0.40593	-0.0350154	0.0361711	0.33302	-0.216155	0.0334582	1.04395e-10	0.161992	0.169207	0.338385	0.658581	7	-0.169654	0.493638	1.17585	0.843957	1.63826	1.176(0.844,1.638)	0.917077
	cg05772917	17	MAPT	44027251	rs112155389	17	43758078	A	G	0.235174	0.0428692	0.0444435	0.334756	0.303643	0.0394199	1.33132e-14	0.141183	0.147511	0.338515	0.105563	18	-0.147939	0.430305	1.15164	0.862484	1.53773	1.152(0.862,1.538)	0.917077
	cg14581475	20	MMP9	44643110	rs1888235	20	44623967	T	C	0.170757	-0.0458956	0.0479071	0.338056	0.880223	0.0420386	2.39207e-97	-0.0521409	0.054483	0.338561	0.37156	20	-0.158928	0.0546458	0.949195	0.853058	1.05617	0.949(0.853,1.056)	0.917077
	cg11848244	4	STIM2	27058499	rs73251786	4	27067456	A	G	0.0695297	-0.0701608	0.0729629	0.336253	-0.538848	0.0606162	6.13859e-19	0.130205	0.136195	0.339062	0.126968	12	-0.136737	0.397147	1.13906	0.872199	1.48757	1.139(0.872,1.488)	0.917077
	cg21230427	15	PCSK6	101991580	rs11637184	15	101991748	C	G	0.305726	-0.0361938	0.0377691	0.337916	-0.441177	0.0347636	6.65387e-37	0.0820392	0.0858535	0.339289	0.0835295	19	-0.0862337	0.250312	1.0855	0.91738	1.28443	1.085(0.917,1.284)	0.917077
	cg14344620	2	TRAPPC12	3418831	rs10166880	2	3428508	G	T	0.368098	-0.0347663	0.0362937	0.338106	-0.426626	0.0313782	4.21476e-42	0.0814913	0.0852824	0.339301	0.0570661	20	-0.0856622	0.248645	1.0849	0.917904	1.28229	1.085(0.918,1.282)	0.917077
	cg21570130	2	NFE2L2	178128687	rs34551701	2	178127040	C	A	0.382413	-0.0354856	0.0368829	0.335992	0.243672	0.0327686	1.0367e-13	-0.145628	0.152625	0.340002	0.701577	15	-0.444773	0.153517	0.864479	0.64097	1.16593	0.864(0.641,1.166)	0.917077
	cg07664173	8	REEP4	21999976	rs4872320	8	22001072	G	A	0.398773	-0.0372282	0.0388532	0.337974	-0.331448	0.03399	1.82077e-22	0.11232	0.117787	0.340294	0.0222793	16	-0.118543	0.343183	1.11887	0.888214	1.40943	1.119(0.888,1.409)	0.917077
	cg00241281	14	PACS2	105779794	rs7146683	14	105759385	G	A	0.323108	0.0369149	0.0386707	0.339782	-0.593745	0.0334491	1.70224e-70	-0.062173	0.0652243	0.34048	0.761903	7	-0.190013	0.0656666	0.93972	0.826949	1.06787	0.94(0.827,1.068)	0.917077
	cg23534142	1	ATF3	212739113	rs11571536	1	212786920	A	G	0.0715746	0.0738212	0.0771452	0.338612	-0.756271	0.0703688	6.10515e-27	-0.0976121	0.102411	0.340518	0.376927	20	-0.298338	0.103113	0.907001	0.742051	1.10862	0.907(0.742,1.109)	0.917077
	cg09278107	14	PACS2	105779826	rs7146683	14	105759385	G	A	0.323108	0.0369149	0.0386707	0.339782	-0.476669	0.0337126	2.17742e-45	-0.0774435	0.0813117	0.340881	0.897092	5	-0.236814	0.0819274	0.925479	0.789138	1.08538	0.925(0.789,1.085)	0.917077
	cg13313836	15	ANXA2	60687284	rs12440452	15	60687230	A	C	0.416155	0.0360314	0.0376586	0.338672	-0.316861	0.0326589	2.9526e-22	-0.113714	0.119425	0.341009	0.611566	16	-0.347787	0.120359	0.892513	0.706249	1.1279	0.893(0.706,1.128)	0.917077
	cg09298313	14	LGALS3	55569959	rs17740741	14	55762712	C	G	0.417178	0.0343365	0.0355534	0.334158	-0.183859	0.0336304	4.57602e-08	-0.186755	0.196367	0.341581	0.523102	16	-0.571634	0.198124	0.829647	0.564602	1.21911	0.83(0.565,1.219)	0.917077
	cg26343183	5	GRIA1	153008721	rs9686257	5	153107260	G	A	0.354806	0.0356671	0.0371622	0.337172	-0.243188	0.0353151	5.7289e-12	-0.146665	0.15429	0.341818	0.905131	16	-0.449073	0.155743	0.863583	0.638219	1.16853	0.864(0.638,1.169)	0.917077
	cg03508284	9	JAK2	4985524	rs1887425	9	4970601	C	A	0.399796	0.0338391	0.0352045	0.336443	0.206825	0.0323941	1.71789e-10	0.163612	0.172132	0.341855	0.124571	20	-0.173767	0.500991	1.17776	0.840493	1.65036	1.178(0.84,1.65)	0.917077
	cg10188410	19	MIR7-3HG	4760503	rs879563	19	4768948	A	G	0.375256	0.0341152	0.035686	0.339081	-0.290442	0.0340618	1.50291e-17	-0.11746	0.123638	0.342097	0.472108	12	-0.35979	0.12487	0.889176	0.697823	1.133	0.889(0.698,1.133)	0.917077
	cg18737534	17	RPA1	1800702	rs3744768	17	1800886	A	G	0.216769	0.0393053	0.0408194	0.335594	0.216112	0.0373994	7.53721e-09	0.181875	0.191485	0.342209	0.250794	7	-0.193436	0.557186	1.19946	0.824123	1.74575	1.199(0.824,1.746)	0.917077
	cg00146027	10	ITGB1	33299147	rs6481820	10	33299937	T	C	0.212679	-0.0398258	0.0419412	0.342334	-1.33064	0.0300941	0	0.0299298	0.0315269	0.342446	0.466915	20	-0.0318629	0.0917225	1.03038	0.968639	1.09606	1.03(0.969,1.096)	0.917077
	cg07502417	1	AGT	230849801	rs7549179	1	230855217	C	G	0.231084	-0.0388001	0.0408915	0.342694	1.02094	0.0338114	2.74358e-200	-0.0380043	0.0400726	0.342932	0.940584	20	-0.116547	0.040538	0.962709	0.889989	1.04137	0.963(0.89,1.041)	0.917077
	cg25931491	11	BRSK2	1422468	rs7394830	11	1408892	G	A	0.331288	0.0379838	0.0395505	0.33686	0.206583	0.0344007	1.91104e-09	0.183867	0.193884	0.342958	0.0710108	7	-0.196146	0.56388	1.20186	0.821893	1.75748	1.202(0.822,1.757)	0.917077
	cg26434881	16	JPH3	87669476	rs4843667	16	87705322	G	A	0.258691	-0.0375163	0.0394292	0.341358	0.401328	0.0377119	1.9011e-26	-0.0934804	0.0986387	0.34328	0.964434	20	-0.286812	0.0998515	0.910756	0.750653	1.10501	0.911(0.751,1.105)	0.917077
	cg21950534	6	ESR1	152128483	rs543648	6	152110944	A	G	0.415133	0.0340288	0.0353914	0.336301	0.180372	0.032585	3.10461e-08	0.188659	0.199151	0.343478	0.0468996	6	-0.201677	0.578995	1.20763	0.817359	1.78424	1.208(0.817,1.784)	0.917077
	cg12461469	3	RNF13	149530341	rs13091511	3	149497184	C	T	0.412065	-0.0334263	0.0352456	0.342935	0.46625	0.0320672	6.78322e-48	-0.0716918	0.0757544	0.343959	0.164802	20	-0.22017	0.0767868	0.930818	0.802382	1.07981	0.931(0.802,1.08)	0.917077
	cg19967554	13	UGGT2	96705908	rs549594	13	96727123	A	G	0.153374	-0.0466172	0.0486583	0.338036	0.274095	0.0460475	2.64178e-09	-0.170077	0.179808	0.34421	0.411586	20	-0.522501	0.182347	0.8436	0.593036	1.20003	0.844(0.593,1.2)	0.917077
	cg01567771	14	TRA	22191382	rs12883985	14	22214273	G	T	0.43047	-0.034309	0.0357924	0.337784	-0.186818	0.0331382	1.72499e-08	0.183649	0.19434	0.344663	0.772689	12	-0.197257	0.564555	1.20159	0.820979	1.75867	1.202(0.821,1.759)	0.917077
	cg10136168	14	POMT2	77783447	rs56247319	14	77739936	C	T	0.226994	0.0425373	0.0444688	0.338787	-0.239067	0.0395489	1.49554e-09	-0.177931	0.188324	0.344757	0.240391	13	-0.547046	0.191184	0.837	0.578657	1.21068	0.837(0.579,1.211)	0.917077
	cg26868097	16	MBTPS1	84118667	rs12920129	16	84209354	A	T	0.336401	-0.0349481	0.0369275	0.343945	-0.462929	0.0334722	1.67393e-43	0.0754934	0.0799557	0.345072	0.562035	20	-0.0812198	0.232207	1.07842	0.921991	1.26138	1.078(0.922,1.261)	0.917077
	cg16795804	2	EIF2AK2	37384523	rs12994023	2	37385057	T	C	0.406953	-0.0337962	0.0357526	0.344516	-0.60876	0.0325032	2.85993e-78	0.0555164	0.0588049	0.345129	0.718301	20	-0.0597412	0.170774	1.05709	0.942008	1.18622	1.057(0.942,1.186)	0.917077
	cg23432654	7	ACTB	5595804	rs852537	7	5594216	C	G	0.121677	-0.051785	0.0542034	0.339384	-0.295532	0.0497098	2.76209e-09	0.175226	0.185763	0.345537			-0.188869	0.539321	1.19152	0.827895	1.71484	1.192(0.828,1.715)	0.917077
	cg09591406	17	ATP2A3	3833873	rs9747965	17	3832182	A	G	0.238241	-0.0412645	0.043104	0.338404	-0.206941	0.0375315	3.51186e-08	0.199402	0.211407	0.345572	0.459961	3	-0.214956	0.61376	1.22067	0.806577	1.84736	1.221(0.807,1.847)	0.917077
	cg14126601	2	EIF2AK2	37384708	rs12994023	2	37385057	T	C	0.406953	-0.0337962	0.0357526	0.344516	-0.465483	0.0328401	1.32259e-45	0.0726046	0.076978	0.345586	0.931426	20	-0.0782723	0.223481	1.07531	0.924713	1.25042	1.075(0.925,1.25)	0.917077
	cg17508639	1	PINK1	20959617	rs74320203	1	20921903	G	A	0.0756646	0.0756551	0.0797974	0.343084	-0.584505	0.0655483	4.7838e-19	-0.129435	0.137291	0.345795	0.0881935	11	-0.398525	0.139655	0.878592	0.671309	1.14988	0.879(0.671,1.15)	0.917077
	cg19511844	17	ORMDL3	38084119	rs11658278	17	38031164	T	C	0.488753	-0.0337767	0.0356933	0.343994	0.336991	0.0324361	2.77144e-25	-0.10023	0.106356	0.345987	0.947051	20	-0.308688	0.108228	0.904629	0.73441	1.1143	0.905(0.734,1.114)	0.917077
	cg08865458	20	TGM2	36793866	rs13045748	20	36800167	A	T	0.365031	0.0334631	0.0355057	0.345952	-1.09985	0.0245527	0	-0.0304251	0.0322895	0.346058	0.473868	20	-0.0937125	0.0328623	0.970033	0.910544	1.03341	0.97(0.911,1.033)	0.917077
[truncated: 2,644 more rows]
